# Supplementary material for: Ionomic and proteomic changes highlight the effect of silicon supply on the nodules functioning of Trifolium incarnatum L
Source: Front Plant Sci. 2024 Nov 6;15:1462149. doi: 10.3389/fpls.2024.1462149 (PMC11576322; doi:10.3389/fpls.2024.1462149)
Supplement: Supplementary file 1 [file DataSheet1.xlsx]

## Sheet: All_Proteins from nodule
Gobal comparative proteomic analysis (+Si versus -Si) of nodules of Trifolium incarnatum L. for 25 days treated (+Si) or not (-Si) with silicon (Si: 1.7 mM) for 25 days.
UNIPROT ID	Organism	logFC	pvalue	FDR	Expression	Protein Name from Uniprot	Gene Ontology IDs	Gene Ontology (biological process)	Gene Ontology (cellular component)	Gene Ontology (molecular function)	Arabidopsis Thaliana or Rizobium leguminosarum Jonhstonnii proteins orthologs	Arabidopsis Thaliana or Rizobium leguminosarum Jonhstonnii gene orthologs
A0A2K3JK72	Trifolium	0.238	0.495457	0.965	Unchanged	Inositol-3-phosphate synthase-like protein	GO:0004512; GO:0006021; GO:0008654	inositol biosynthetic process [GO:0006021]; phospholipid biosynthetic process [GO:0008654]		inositol-3-phosphate synthase activity [GO:0004512]	A0A1P8B151	#N/A
A0A2K3JLM5	Trifolium	0.238	0.542027	0.967	Unchanged	HMG-Y-related protein A	GO:0000786; GO:0003677; GO:0005634; GO:0006334; GO:0006355; GO:0008757	nucleosome assembly [GO:0006334]; regulation of DNA-templated transcription [GO:0006355]	nucleosome [GO:0000786]; nucleus [GO:0005634]	DNA binding [GO:0003677]; S-adenosylmethionine-dependent methyltransferase activity [GO:0008757]	Q43386	AT1G14900
A0A2K3JLX2	Trifolium	-2.1	4.2857e-05	0.0662	Down-regulated	LRR receptor-like kinase resistance protein	GO:0004674; GO:0005524; GO:0016310	phosphorylation [GO:0016310]		ATP binding [GO:0005524]; protein serine/threonine kinase activity [GO:0004674]	C0LGT1	AT5G10290
A0A2K3JLZ8	Trifolium	1.01	0.0252902	0.782	Up-regulated	Protein TOC75 chloroplastic-like	GO:0016020		membrane [GO:0016020]		Q9STE8	AT3G46740
A0A2K3JNZ4	Trifolium	0.78	0.0280964	0.796	Up-regulated	Ctc-interacting domain 11 protein					F4JME0	#N/A
A0A2K3JP94	Trifolium	-0.297	0.285025	0.951	Unchanged	Splicing factor 3A subunit 2-like protein	GO:0003676; GO:0005634; GO:0006397; GO:0008270; GO:0016020	mRNA processing [GO:0006397]	membrane [GO:0016020]; nucleus [GO:0005634]	nucleic acid binding [GO:0003676]; zinc ion binding [GO:0008270]	O80897	AT2G32600
A0A2K3JQ54	Trifolium	1.18	0.115334	0.914	Unchanged	DNA topoisomerase 1-like protein	GO:0016853			isomerase activity [GO:0016853]	A0A1P8B5I9	AT4G31210
A0A2K3JQP2	Trifolium	-1.04	0.0156238	0.715	Down-regulated	Geraniol 8-hydroxylase-like	GO:0004497; GO:0005506; GO:0016020; GO:0016705; GO:0020037		membrane [GO:0016020]	heme binding [GO:0020037]; iron ion binding [GO:0005506]; monooxygenase activity [GO:0004497]; oxidoreductase activity, acting on paired donors, with incorporation or reduction of molecular oxygen [GO:0016705]	F4HRA1	AT1G33730
A0A2K3JSB6	Trifolium	-0.786	0.130152	0.92	Unchanged	Single-stranded DNA-binding protein WHY1 chloroplastic-like	GO:0003697; GO:0006355; GO:0006952	defense response [GO:0006952]; regulation of DNA-templated transcription [GO:0006355]		single-stranded DNA binding [GO:0003697]	Q9M9S3	AT1G14410
A0A2K3JTZ9	Trifolium	-1.59	0.00168072	0.43	Down-regulated	ABC transporter B family member	GO:0005524; GO:0016020; GO:0016887		membrane [GO:0016020]	ATP binding [GO:0005524]; ATP hydrolysis activity [GO:0016887]	Q9FWX7	AT1G02520
A0A2K3JUL7	Trifolium	-0.203	0.691488	0.972	Unchanged	Uncharacterized protein					#N/A	#N/A
A0A2K3K0F7	Trifolium	0.479	0.5521	0.967	Unchanged	Cysteine-rich transmembrane CYSTM domain-containing protein	GO:0005886		plasma membrane [GO:0005886]		Q9SKX9	AT2G32210
A0A2K3K2N6	Trifolium	-0.349	0.619296	0.97	Unchanged	Auxin-induced protein pcnt115-like					Q9ASZ9	AT1G60730
A0A2K3K3E3	Trifolium	-0.167	0.763578	0.974	Unchanged	Pathogenesis-related protein 2	GO:0005576		extracellular region [GO:0005576]		Q9ZNS4	AT2G14580
A0A2K3K4H9	Trifolium	0.28	0.505019	0.966	Unchanged	Ribonuclease HI-like protein	GO:0003676; GO:0004523			nucleic acid binding [GO:0003676]; RNA-DNA hybrid ribonuclease activity [GO:0004523]	F4JEB4	AT3G01410
A0A2K3K4Y4	Trifolium	0.503	0.223091	0.943	Unchanged	Pentatricopeptide repeat-containing protein at3g49240-like protein					Q9M3A8	AT3G49240
A0A2K3KCP6	Trifolium	2.6	0.00166872	0.429	Up-regulated	Heat shock protein	GO:0005524; GO:0140662			ATP binding [GO:0005524]; ATP-dependent protein folding chaperone [GO:0140662]	Q9LHA8	AT3G12580
A0A2K3KDI4	Trifolium	0.0157	0.945374	0.977	Unchanged	Cinnamoyl CoA reductase	GO:0016491			oxidoreductase activity [GO:0016491]	A0A1P8ASX1	#N/A
A0A2K3KFC9	Trifolium	-0.212	0.64993	0.971	Unchanged	Aldehyde dehydrogenase family 2 member c4-like protein	GO:0016620			oxidoreductase activity, acting on the aldehyde or oxo group of donors, NAD or NADP as acceptor [GO:0016620]	Q56YU0	AT3G24503
A0A2K3KH19	Trifolium	-0.387	0.189825	0.937	Unchanged	Uncharacterized protein					#N/A	#N/A
A0A2K3KIB8	Trifolium	-0.479	0.493983	0.965	Unchanged	Aldo/keto-reductase family protein					Q93ZN2	AT1G60710
A0A2K3KLB8	Trifolium	-1.78	0.000197251	0.159	Down-regulated	DUF2752 domain-containing protein					A0A1P8AW47	AT1G29320
A0A2K3KPE9	Trifolium	-1.45	0.0256029	0.784	Down-regulated	PfkB family carbohydrate kinase	GO:0016301; GO:0016310	phosphorylation [GO:0016310]		kinase activity [GO:0016301]	Q9LN35	AT1G19600
A0A2K3KSR4	Trifolium	0.584	0.257671	0.948	Unchanged	Carbonic anhydrase (EC 4.2.1.1)	GO:0004089; GO:0008270; GO:0009570		chloroplast stroma [GO:0009570]	carbonate dehydratase activity [GO:0004089]; zinc ion binding [GO:0008270]	Q8L817	AT1G08080
A0A2K3KVJ5	Trifolium	-0.063	0.843411	0.975	Unchanged	Glutathione S-transferase-like protein	GO:0016740			transferase activity [GO:0016740]	Q9ZW24	AT2G29420
A0A2K3KVP1	Trifolium	-1.01	0.0838502	0.896	Unchanged	NADH dehydrogenase [ubiquinone] 1 alpha subcomplex subunit 13	GO:0005747		mitochondrial respiratory chain complex I [GO:0005747]		A0A1P8B0W9	#N/A
A0A2K3KVU6	Trifolium	-0.0644	0.903928	0.976	Unchanged	UDP-glycosyltransferase 73C2-like protein	GO:0008194; GO:0071704	organic substance metabolic process [GO:0071704]		UDP-glycosyltransferase activity [GO:0008194]	Q9SCP5	AT3G53160
A0A2K3KY31	Trifolium	0.0512	0.850634	0.975	Unchanged	Rhamnose synthase					Q9LQ04	AT1G63000
A0A2K3KY89	Trifolium	0.494	0.0581654	0.869	Unchanged	glucose-1-phosphate adenylyltransferase (EC 2.7.7.27)	GO:0005978; GO:0008878	glycogen biosynthetic process [GO:0005978]		glucose-1-phosphate adenylyltransferase activity [GO:0008878]	P55230	AT1G27680
A0A2K3KYJ1	Trifolium	0.703	0.0404107	0.836	Up-regulated	Putative sulfate transporter 3.5-like protein	GO:0016020; GO:0055085	transmembrane transport [GO:0055085]	membrane [GO:0016020]		Q94LW6	AT5G19600
A0A2K3KZM5	Trifolium	-0.541	0.403488	0.96	Unchanged	Thaumatin-like pathogenesis-related protein 4-like					P50700	AT4G11650
A0A2K3KZZ5	Trifolium	-0.845	0.0160254	0.718	Down-regulated	inositol-3-phosphate synthase (EC 5.5.1.4)	GO:0004512; GO:0006021; GO:0008654	inositol biosynthetic process [GO:0006021]; phospholipid biosynthetic process [GO:0008654]		inositol-3-phosphate synthase activity [GO:0004512]	P42801	AT4G39800
A0A2K3L049	Trifolium	-0.233	0.712794	0.972	Unchanged	Translation initiation factor eIF-2B subunit delta-like protein	GO:0003743			translation initiation factor activity [GO:0003743]	Q9FFV8	AT5G38640
A0A2K3L099	Trifolium	-0.313	0.140714	0.924	Unchanged	ABC-type xenobiotic transporter (EC 7.6.2.2)	GO:0005524; GO:0016020; GO:0016887; GO:0140359		membrane [GO:0016020]	ABC-type transporter activity [GO:0140359]; ATP binding [GO:0005524]; ATP hydrolysis activity [GO:0016887]	Q9LZJ5	AT3G62700
A0A2K3L222	Trifolium	0.683	0.0960331	0.904	Unchanged	UDP-glycosyltransferase 83A1-like protein	GO:0016740			transferase activity [GO:0016740]	Q9SGA8	AT3G02100
A0A2K3L230	Trifolium	0.366	0.251784	0.947	Unchanged	KS-dehydrin	GO:0046872			metal ion binding [GO:0046872]	#N/A	#N/A
A0A2K3L2A0	Trifolium	-0.743	0.0095632	0.66	Down-regulated	UDP-glucuronate 4-epimerase 6-like protein	GO:0016020		membrane [GO:0016020]		Q9LIS3	AT3G23820
A0A2K3L2G9	Trifolium	1	0.00197067	0.455	Up-regulated	hydroxyacylglutathione hydrolase (EC 3.1.2.6) (Glyoxalase II)	GO:0016787			hydrolase activity [GO:0016787]	O24496	AT3G10850
A0A2K3L3M9	Trifolium	0.479	0.283747	0.951	Unchanged	Glutathione S-transferase (EC 2.5.1.18)	GO:0004364; GO:0005829; GO:0006749; GO:0042221	glutathione metabolic process [GO:0006749]; response to chemical [GO:0042221]	cytosol [GO:0005829]	glutathione transferase activity [GO:0004364]	Q9ZRW8	AT1G78380
A0A2K3L3N7	Trifolium	0.357	0.310632	0.953	Unchanged	ABC-type xenobiotic transporter (EC 7.6.2.2)	GO:0005524; GO:0016020; GO:0016887; GO:0140359		membrane [GO:0016020]	ABC-type transporter activity [GO:0140359]; ATP binding [GO:0005524]; ATP hydrolysis activity [GO:0016887]	A0A1P8AW42	#N/A
A0A2K3L4I6	Trifolium	0.461	0.516942	0.966	Unchanged	Pathogenesis-related protein p2-like	GO:0004540; GO:0042742; GO:0050832	defense response to bacterium [GO:0042742]; defense response to fungus [GO:0050832]		RNA nuclease activity [GO:0004540]	P43082	AT3G04720
A0A2K3L4M8	Trifolium	1.86	0.00105758	0.355	Up-regulated	Dynamin-related protein 3a-like	GO:0003924; GO:0005525; GO:0005737; GO:0043231		cytoplasm [GO:0005737]; intracellular membrane-bounded organelle [GO:0043231]	GTP binding [GO:0005525]; GTPase activity [GO:0003924]	A0A1P8AX46	#N/A
A0A2K3L686	Trifolium	1.6	0.0112315	0.675	Up-regulated	valine--tRNA ligase (EC 6.1.1.9) (Valyl-tRNA synthetase)	GO:0004832; GO:0005524; GO:0006438	valyl-tRNA aminoacylation [GO:0006438]		ATP binding [GO:0005524]; valine-tRNA ligase activity [GO:0004832]	P93736	AT1G14610
A0A2K3L694	Trifolium	1.08	0.022618	0.767	Up-regulated	peroxidase (EC 1.11.1.7)	GO:0006979; GO:0020037; GO:0046872; GO:0140825	response to oxidative stress [GO:0006979]		heme binding [GO:0020037]; lactoperoxidase activity [GO:0140825]; metal ion binding [GO:0046872]	Q9FLC0	AT5G05340
A0A2K3L6T5	Trifolium	2.04	5.18152e-05	0.0758	Up-regulated	60S ribosome subunit biogenesis protein NIP7 homolog	GO:0003723; GO:0005730; GO:0042255	ribosome assembly [GO:0042255]	nucleolus [GO:0005730]	RNA binding [GO:0003723]	Q6NM52	AT4G15770
A0A2K3L715	Trifolium	-0.409	0.0383615	0.831	Unchanged	Protein SSUH2					Q9SH87	AT2G38000
A0A2K3L777	Trifolium	-1.28	0.00951591	0.659	Down-regulated	Vinorine synthase-like protein	GO:0016746; GO:0071704	organic substance metabolic process [GO:0071704]		acyltransferase activity [GO:0016746]	Q9FYM0	AT1G24430
A0A2K3L870	Trifolium	-0.895	0.00334408	0.524	Down-regulated	Isoflavone synthase	GO:0004497; GO:0005506; GO:0016020; GO:0016705; GO:0020037		membrane [GO:0016020]	heme binding [GO:0020037]; iron ion binding [GO:0005506]; monooxygenase activity [GO:0004497]; oxidoreductase activity, acting on paired donors, with incorporation or reduction of molecular oxygen [GO:0016705]	Q9FL56	AT5G06900
A0A2K3L9F6	Trifolium	-0.582	0.120848	0.917	Unchanged	Cytochrome p450 76c4-like protein	GO:0004497; GO:0005506; GO:0016020; GO:0016705; GO:0020037		membrane [GO:0016020]	heme binding [GO:0020037]; iron ion binding [GO:0005506]; monooxygenase activity [GO:0004497]; oxidoreductase activity, acting on paired donors, with incorporation or reduction of molecular oxygen [GO:0016705]	A0A1P8ANS0	#N/A
A0A2K3L9U7	Trifolium	-0.345	0.246458	0.946	Unchanged	superoxide dismutase (EC 1.15.1.1)	GO:0004784; GO:0005507			copper ion binding [GO:0005507]; superoxide dismutase activity [GO:0004784]	P24704	AT1G08830
A0A2K3LC55	Trifolium	1.28	0.00900992	0.654	Up-regulated	Flowering-promoting factor 1-like protein 2-like	GO:0009909	regulation of flower development [GO:0009909]			Q9LXB5	AT5G10625
A0A2K3LCA0	Trifolium	-0.856	0.168109	0.932	Unchanged	Palmitoyl-protein thioesterase 1-like	GO:0016787			hydrolase activity [GO:0016787]	Q9LY31	AT3G60340
A0A2K3LE99	Trifolium	0.221	0.716895	0.972	Unchanged	Aminotransferase-like plant mobile domain-containing protein					#N/A	#N/A
A0A2K3LEP8	Trifolium	-0.822	0.151183	0.927	Unchanged	Vacuolar-processing enzyme-like protein	GO:0006508; GO:0008234	proteolysis [GO:0006508]		cysteine-type peptidase activity [GO:0008234]	Q39044	AT1G62710
A0A2K3LFB9	Trifolium	0.172	0.685947	0.972	Unchanged	Asparagine synthetase	GO:0004066; GO:0006529	asparagine biosynthetic process [GO:0006529]		asparagine synthase (glutamine-hydrolyzing) activity [GO:0004066]	P49078	AT3G47340
A0A2K3LFW5	Trifolium	0.615	0.148282	0.927	Unchanged	Fructose-bisphosphate aldolase (EC 4.1.2.13)	GO:0003729; GO:0004332; GO:0006096	glycolytic process [GO:0006096]		fructose-bisphosphate aldolase activity [GO:0004332]; mRNA binding [GO:0003729]	Q9SJQ9	AT2G36460
A0A2K3LFX0	Trifolium	0.321	0.206521	0.94	Unchanged	Aldose 1-epimerase-like protein	GO:0005975; GO:0016853; GO:0030246	carbohydrate metabolic process [GO:0005975]		carbohydrate binding [GO:0030246]; isomerase activity [GO:0016853]	Q9STT3	AT3G47800
A0A2K3LHK0	Trifolium	-0.983	0.07936	0.892	Unchanged	NADP-dependent alkenal double bond reductase p1-like protein	GO:0016628			oxidoreductase activity, acting on the CH-CH group of donors, NAD or NADP as acceptor [GO:0016628]	Q39173	AT5G16990
A0A2K3LI32	Trifolium	1.2	0.0313777	0.809	Up-regulated	Cytochrome p450 71a1-like protein	GO:0004497; GO:0005506; GO:0016020; GO:0016705; GO:0020037		membrane [GO:0016020]	heme binding [GO:0020037]; iron ion binding [GO:0005506]; monooxygenase activity [GO:0004497]; oxidoreductase activity, acting on paired donors, with incorporation or reduction of molecular oxygen [GO:0016705]	Q9STL1	AT3G48310
A0A2K3LKQ6	Trifolium	-1.54	0.0101304	0.665	Down-regulated	Acetamidase formamidase family protein	GO:0016811			hydrolase activity, acting on carbon-nitrogen (but not peptide) bonds, in linear amides [GO:0016811]	A0A1P8B5Z4	#N/A
A0A2K3LLA5	Trifolium	-0.671	0.175547	0.934	Unchanged	Uncharacterized protein	GO:0051225; GO:0070652	spindle assembly [GO:0051225]	HAUS complex [GO:0070652]		Q8GYM3	AT1G50710
A0A2K3LLM5	Trifolium	-0.604	0.268168	0.949	Unchanged	Random slug protein 5-like					Q9LM14	AT1G22180
A0A2K3LM94	Trifolium	-1.32	0.00252482	0.49	Down-regulated	Adenylosuccinate synthetase (EC 6.3.4.4)	GO:0004019; GO:0005525; GO:0044208; GO:0046872	'de novo' AMP biosynthetic process [GO:0044208]		adenylosuccinate synthase activity [GO:0004019]; GTP binding [GO:0005525]; metal ion binding [GO:0046872]	Q96529	AT3G57610
A0A2K3LMA4	Trifolium	-1.49	0.00749743	0.634	Down-regulated	Pyruvate dehydrogenase E1 component subunit alpha mitochondrial-like	GO:0016624			oxidoreductase activity, acting on the aldehyde or oxo group of donors, disulfide as acceptor [GO:0016624]	Q8H1Y0	AT1G24180
A0A2K3LMR6	Trifolium	1.82	0.0183216	0.736	Up-regulated	Putative glutamyl endopeptidase chloroplastic-like					Q8VZF3	AT2G47390
A0A2K3LPY5	Trifolium	0.241	0.754454	0.973	Unchanged	DNA-directed RNA polymerases I, II, and III subunit RPABC1	GO:0003677; GO:0003899; GO:0006351; GO:0055029	DNA-templated transcription [GO:0006351]	nuclear DNA-directed RNA polymerase complex [GO:0055029]	DNA binding [GO:0003677]; DNA-directed 5'-3' RNA polymerase activity [GO:0003899]	O81098	AT3G22320
A0A2K3LQ26	Trifolium	0.55	0.262571	0.948	Unchanged	Amine oxidase (EC 1.4.3.-)	GO:0005507; GO:0009308; GO:0042221; GO:0048038; GO:0052593; GO:0052594; GO:0052596	amine metabolic process [GO:0009308]; response to chemical [GO:0042221]		aminoacetone:oxygen oxidoreductase(deaminating) activity [GO:0052594]; copper ion binding [GO:0005507]; phenethylamine:oxygen oxidoreductase (deaminating) activity [GO:0052596]; quinone binding [GO:0048038]; tryptamine:oxygen oxidoreductase (deaminating) activity [GO:0052593]	F4IAX0	AT1G31690
A0A2K3LQ64	Trifolium	-1.45	0.00822495	0.645	Down-regulated	14-3-3-like protein gf14 iota-like					Q9C5W6	AT1G26480
A0A2K3LRD0	Trifolium	-2.42	0.013019	0.69	Down-regulated	Amine oxidase (EC 1.4.3.-)	GO:0005507; GO:0009308; GO:0042221; GO:0048038; GO:0052593; GO:0052594; GO:0052596	amine metabolic process [GO:0009308]; response to chemical [GO:0042221]		aminoacetone:oxygen oxidoreductase(deaminating) activity [GO:0052594]; copper ion binding [GO:0005507]; phenethylamine:oxygen oxidoreductase (deaminating) activity [GO:0052596]; quinone binding [GO:0048038]; tryptamine:oxygen oxidoreductase (deaminating) activity [GO:0052593]	F4IAX1	AT1G31710
A0A2K3LRJ6	Trifolium	0.261	0.278959	0.95	Unchanged	Vesicle-associated membrane protein 726-like protein	GO:0016020		membrane [GO:0016020]		B9DH97	#N/A
A0A2K3LSY3	Trifolium	-1.07	0.00203323	0.46	Down-regulated	Glycosyltransferase (EC 2.4.1.-)	GO:0008194			UDP-glycosyltransferase activity [GO:0008194]	Q8W491	AT4G34131
A0A2K3LUK0	Trifolium	0.691	0.0982313	0.905	Unchanged	ATP sulfurylase chloroplastic-like	GO:0004781; GO:0005524; GO:0009507		chloroplast [GO:0009507]	ATP binding [GO:0005524]; sulfate adenylyltransferase (ATP) activity [GO:0004781]	Q9LIK9	AT3G22890
A0A2K3LV99	Trifolium	1.4	0.00683998	0.624	Up-regulated	UDP-glycosyltransferase 75D1-like protein	GO:0008194			UDP-glycosyltransferase activity [GO:0008194]	O23406	AT4G15550
A0A2K3LW51	Trifolium	-0.327	0.36957	0.958	Unchanged	Isoflavone 7-O-methyltransferase-like protein	GO:0008171; GO:0008757; GO:0032259; GO:0046983	methylation [GO:0032259]		O-methyltransferase activity [GO:0008171]; protein dimerization activity [GO:0046983]; S-adenosylmethionine-dependent methyltransferase activity [GO:0008757]	Q9T002	AT4G35150
A0A2K3LZ10	Trifolium	-1.83	0.000155862	0.144	Down-regulated	Aldo/keto reductase					Q93ZN2	AT1G60710
A0A2K3LZU8	Trifolium	-0.555	0.25067	0.947	Unchanged	Aldehyde dehydrogenase family 2 member c4-like protein	GO:0016491			oxidoreductase activity [GO:0016491]	Q56YU0	AT3G24503
A0A2K3M085	Trifolium	-2.41	1.52792e-05	0.0241	Down-regulated	Protein VAC14	GO:0006661; GO:0070772	phosphatidylinositol biosynthetic process [GO:0006661]	PAS complex [GO:0070772]		Q9ZU97	AT2G01690
A0A2K3M175	Trifolium	-0.713	0.0321142	0.812	Down-regulated	Glutathione reductase cytosolic-like	GO:0016491; GO:0045454; GO:0050660	cell redox homeostasis [GO:0045454]		flavin adenine dinucleotide binding [GO:0050660]; oxidoreductase activity [GO:0016491]	P48641	AT3G24170
A0A2K3M1Y4	Trifolium	-1.49	6.43487e-05	0.0859	Down-regulated	Uncharacterized protein					Q93W02	AT5G24690
A0A2K3M2J2	Trifolium	-0.879	0.189855	0.937	Unchanged	Carbon catabolite repressor-like protein					A0A1P8AWP9	#N/A
A0A2K3M2X6	Trifolium	0.954	0.0197828	0.748	Up-regulated	RING-H2 finger protein ATL80-like	GO:0004842; GO:0016020; GO:0046872		membrane [GO:0016020]	metal ion binding [GO:0046872]; ubiquitin-protein transferase activity [GO:0004842]	Q8LC69	AT1G76410
A0A2K3M589	Trifolium	1.82	0.00254903	0.491	Up-regulated	UDP-galactose:fucoside alpha-3-galactosyltransferase	GO:0016757			glycosyltransferase activity [GO:0016757]	A0A1P8AMK7	#N/A
A0A2K3M5S7	Trifolium	0.71	0.101352	0.907	Unchanged	Early nodulin enod18					Q8LC99	#N/A
A0A2K3M701	Trifolium	0.114	0.674476	0.971	Unchanged	NADH dehydrogenase [ubiquinone] 1 beta subcomplex subunit 9 (Complex I-B22) (NADH-ubiquinone oxidoreductase B22 subunit)	GO:0005743; GO:0006120; GO:0070469	mitochondrial electron transport, NADH to ubiquinone [GO:0006120]	mitochondrial inner membrane [GO:0005743]; respirasome [GO:0070469]		Q945M1	AT4G34700
A0A2K3M7L4	Trifolium	1.01	0.0214335	0.76	Up-regulated	Uncharacterized protein					#N/A	#N/A
A0A2K3M8Q3	Trifolium	-0.229	0.644475	0.97	Unchanged	Uncharacterized protein					#N/A	#N/A
A0A2K3MCE6	Trifolium	1.23	0.000988497	0.346	Up-regulated	6-phosphofructokinase 3-like protein	GO:0016301; GO:0016310	phosphorylation [GO:0016310]		kinase activity [GO:0016301]	Q94AA4	AT4G26270
A0A2K3MDR1	Trifolium	2.18	0.00318628	0.518	Up-regulated	Putative glutamyl endopeptidase chloroplastic-like	GO:0006508; GO:0008236	proteolysis [GO:0006508]		serine-type peptidase activity [GO:0008236]	Q8VZF3	AT2G47390
A0A2K3ME72	Trifolium	-0.495	0.24907	0.947	Unchanged	Cinnamoyl-CoA reductase 1-like protein	GO:0016491			oxidoreductase activity [GO:0016491]	A0A1P8B2J5	#N/A
A0A2K3MEA8	Trifolium	-0.0256	0.967378	0.977	Unchanged	chitinase (EC 3.2.1.14)	GO:0004553; GO:0005975	carbohydrate metabolic process [GO:0005975]		hydrolase activity, hydrolyzing O-glycosyl compounds [GO:0004553]	P19172	AT5G24090
A0A2K3MFK3	Trifolium	0.0362	0.961065	0.977	Unchanged	ABC-type xenobiotic transporter (EC 7.6.2.2)	GO:0005524; GO:0016887			ATP binding [GO:0005524]; ATP hydrolysis activity [GO:0016887]	Q9LYS2	AT3G59140
A0A2K3MFY3	Trifolium	-2.13	5.7564e-05	0.0809	Down-regulated	AMP deaminase	GO:0016020		membrane [GO:0016020]		O80452	AT2G38280
A0A2K3MGM6	Trifolium	0.293	0.241097	0.946	Unchanged	Vesicle transport V-SNARE amino-terminal protein	GO:0005737; GO:0015031; GO:0016020	protein transport [GO:0015031]	cytoplasm [GO:0005737]; membrane [GO:0016020]		Q9SEL5	AT1G26670
A0A2K3MGZ1	Trifolium	0.0648	0.920565	0.977	Unchanged	chitinase (EC 3.2.1.14)	GO:0004553; GO:0005975	carbohydrate metabolic process [GO:0005975]		hydrolase activity, hydrolyzing O-glycosyl compounds [GO:0004553]	P19172	AT5G24090
A0A2K3MHS9	Trifolium	-0.108	0.732671	0.973	Unchanged	DNA-damage-repair/toleration protein DRT111 chloroplastic-like protein	GO:0003723; GO:0009507; GO:0043484; GO:0045292	mRNA cis splicing, via spliceosome [GO:0045292]; regulation of RNA splicing [GO:0043484]	chloroplast [GO:0009507]	RNA binding [GO:0003723]	P42698	AT1G30480
A0A2K3MJS6	Trifolium	0.776	0.0641309	0.877	Unchanged	Basic blue protein	GO:0009055			electron transfer activity [GO:0009055]	Q8LG89	AT2G02850
A0A2K3MKR9	Trifolium	-0.51	0.112795	0.913	Unchanged	Crooked neck 1-like protein	GO:0000398	mRNA splicing, via spliceosome [GO:0000398]			F4JZX8	AT5G41770
A0A2K3MPK4	Trifolium	-0.121	0.744943	0.973	Unchanged	GroES chaperonin	GO:0005524; GO:0044183; GO:0046914			ATP binding [GO:0005524]; protein folding chaperone [GO:0044183]; transition metal ion binding [GO:0046914]	O65282	AT5G20720
A0A2K3MPN2	Trifolium	2.82	0.000749389	0.308	Up-regulated	Ribonuclease H	GO:0003676; GO:0004523			nucleic acid binding [GO:0003676]; RNA-DNA hybrid ribonuclease activity [GO:0004523]	P0C2F6	#N/A
A0A2K3MQB1	Trifolium	-0.027	0.904047	0.976	Unchanged	RNA helicase (EC 3.6.4.13)	GO:0003723; GO:0003724; GO:0005524; GO:0016787; GO:0044238	primary metabolic process [GO:0044238]		ATP binding [GO:0005524]; hydrolase activity [GO:0016787]; RNA binding [GO:0003723]; RNA helicase activity [GO:0003724]	Q39189	AT5G62190
A0A2K3MQS8	Trifolium	-0.622	0.0237034	0.774	Down-regulated	Ras GTPase-activating protein-binding protein 1-like	GO:0003723; GO:0005737; GO:0043229		cytoplasm [GO:0005737]; intracellular organelle [GO:0043229]	RNA binding [GO:0003723]	Q8VYJ4	#N/A
A0A2K3MQZ7	Trifolium	-0.689	0.211622	0.941	Unchanged	Cytochrome p450 82a3-like protein	GO:0004497; GO:0005506; GO:0016020; GO:0016705; GO:0020037		membrane [GO:0016020]	heme binding [GO:0020037]; iron ion binding [GO:0005506]; monooxygenase activity [GO:0004497]; oxidoreductase activity, acting on paired donors, with incorporation or reduction of molecular oxygen [GO:0016705]	Q9SZ46	AT4G31940
A0A2K3MR61	Trifolium	-2.71	0.000581935	0.271	Down-regulated	Pachytene checkpoint protein 2 homolog	GO:0005524; GO:0005634; GO:0005694; GO:0007131; GO:0042138	meiotic DNA double-strand break formation [GO:0042138]; reciprocal meiotic recombination [GO:0007131]	chromosome [GO:0005694]; nucleus [GO:0005634]	ATP binding [GO:0005524]	A0A1P8B3Y3	#N/A
A0A2K3MR62	Trifolium	-0.0365	0.913697	0.976	Unchanged	amino-acid N-acetyltransferase (EC 2.3.1.1)	GO:0004042; GO:0005737; GO:0006526; GO:0103045	arginine biosynthetic process [GO:0006526]	cytoplasm [GO:0005737]	acetyl-CoA:L-glutamate N-acetyltransferase activity [GO:0004042]; methione N-acyltransferase activity [GO:0103045]	B5X4Z4	AT4G37670
A0A2K3MR63	Trifolium	1.17	0.000429108	0.233	Up-regulated	Elongation factor Tu mitochondrial-like	GO:0003746; GO:0003924; GO:0005525			GTP binding [GO:0005525]; GTPase activity [GO:0003924]; translation elongation factor activity [GO:0003746]	Q9ZT91	AT4G02930
A0A2K3MR74	Trifolium	-0.228	0.514185	0.966	Unchanged	12-oxophytodienoate reductase	GO:0010181; GO:0016491			FMN binding [GO:0010181]; oxidoreductase activity [GO:0016491]	Q8LAH7	AT1G76680
A0A2K3MRB8	Trifolium	-2.62	0.000226194	0.17	Down-regulated	S-adenosyl-L-methionine-dependent methyltransferase	GO:0008168; GO:0016020; GO:0032259	methylation [GO:0032259]	membrane [GO:0016020]	methyltransferase activity [GO:0008168]	O64850	#N/A
A0A2K3MRM0	Trifolium	-1.25	0.00160298	0.423	Down-regulated	Patellin-4-like protein	GO:0007049; GO:0008289; GO:0051301; GO:0071365; GO:1901703	cell cycle [GO:0007049]; cell division [GO:0051301]; cellular response to auxin stimulus [GO:0071365]; protein localization involved in auxin polar transport [GO:1901703]		lipid binding [GO:0008289]	Q94C59	AT1G30690
A0A2K3MSH0	Trifolium	0.406	0.0539941	0.863	Unchanged	Bah and coiled-coil domain-containing protein 1-like	GO:0000976; GO:0003682; GO:0005634; GO:0010228; GO:0035064; GO:0045814; GO:0046872; GO:2000028	negative regulation of gene expression, epigenetic [GO:0045814]; regulation of photoperiodism, flowering [GO:2000028]; vegetative to reproductive phase transition of meristem [GO:0010228]	nucleus [GO:0005634]	chromatin binding [GO:0003682]; metal ion binding [GO:0046872]; methylated histone binding [GO:0035064]; transcription cis-regulatory region binding [GO:0000976]	Q9FEN9	AT4G39100
A0A2K3MTC4	Trifolium	0.439	0.0227189	0.768	Unchanged	Glyceraldehyde-3-phosphate dehydrogenase (EC 1.2.1.-)	GO:0006006; GO:0006096; GO:0016620; GO:0050661; GO:0051287	glucose metabolic process [GO:0006006]; glycolytic process [GO:0006096]		NAD binding [GO:0051287]; NADP binding [GO:0050661]; oxidoreductase activity, acting on the aldehyde or oxo group of donors, NAD or NADP as acceptor [GO:0016620]	P25858	AT3G04120
A0A2K3MTQ7	Trifolium	-0.994	0.00415905	0.555	Down-regulated	D-3-phosphoglycerate dehydrogenase (EC 1.1.1.95)	GO:0004617; GO:0006564; GO:0051287	L-serine biosynthetic process [GO:0006564]		NAD binding [GO:0051287]; phosphoglycerate dehydrogenase activity [GO:0004617]	O04130	AT1G17745
A0A2K3MU11	Trifolium	-1.24	0.000308672	0.19	Down-regulated	Phospholipid-transporting ATPase (EC 7.6.2.1)	GO:0000287; GO:0005524; GO:0015914; GO:0016020; GO:0016887; GO:0140326	phospholipid transport [GO:0015914]	membrane [GO:0016020]	ATP binding [GO:0005524]; ATP hydrolysis activity [GO:0016887]; ATPase-coupled intramembrane lipid transporter activity [GO:0140326]; magnesium ion binding [GO:0000287]	P98204	AT5G04930
A0A2K3MU46	Trifolium	-0.251	0.240694	0.945	Unchanged	S-adenosylmethionine synthase (EC 2.5.1.6)	GO:0004478; GO:0005524; GO:0005737; GO:0006556; GO:0006730; GO:0046872	one-carbon metabolic process [GO:0006730]; S-adenosylmethionine biosynthetic process [GO:0006556]	cytoplasm [GO:0005737]	ATP binding [GO:0005524]; metal ion binding [GO:0046872]; methionine adenosyltransferase activity [GO:0004478]	P23686	AT1G02500
A0A2K3MU51	Trifolium	-0.299	0.651139	0.971	Unchanged	Sister chromatid cohesion PDS5-like protein	GO:0005634; GO:0007064; GO:0035825; GO:0051301	cell division [GO:0051301]; homologous recombination [GO:0035825]; mitotic sister chromatid cohesion [GO:0007064]	nucleus [GO:0005634]		F4I736	#N/A
A0A2K3MUC7	Trifolium	-1.17	0.000335707	0.201	Down-regulated	Adenosylhomocysteinase (EC 3.13.2.1)	GO:0004013; GO:0006730	one-carbon metabolic process [GO:0006730]		adenosylhomocysteinase activity [GO:0004013]	O23255	AT4G13940
A0A2K3MUD0	Trifolium	0.278	0.577588	0.968	Unchanged	Urease accessory protein UreG-like	GO:0003924; GO:0005525; GO:0006807; GO:0016151	nitrogen compound metabolic process [GO:0006807]		GTP binding [GO:0005525]; GTPase activity [GO:0003924]; nickel cation binding [GO:0016151]	O64700	AT2G34470
A0A2K3MUK7	Trifolium	0.742	0.0507184	0.858	Unchanged	Potassium channel	GO:0005249; GO:0034702; GO:0034765	regulation of monoatomic ion transmembrane transport [GO:0034765]	monoatomic ion channel complex [GO:0034702]	voltage-gated potassium channel activity [GO:0005249]	A0A1P8B0E9	#N/A
A0A2K3MUN3	Trifolium	-1.13	0.0232503	0.771	Down-regulated	Transcription initiation factor IIF subunit beta-like protein	GO:0003743; GO:0005674; GO:0006367; GO:0008757	transcription initiation at RNA polymerase II promoter [GO:0006367]	transcription factor TFIIF complex [GO:0005674]	S-adenosylmethionine-dependent methyltransferase activity [GO:0008757]; translation initiation factor activity [GO:0003743]	Q9LQZ4	AT1G75510
A0A2K3MUX7	Trifolium	-0.963	0.0402631	0.836	Down-regulated	Protein strubbelig-receptor family 3-like	GO:0004672; GO:0005524; GO:0016310; GO:0050896	phosphorylation [GO:0016310]; response to stimulus [GO:0050896]		ATP binding [GO:0005524]; protein kinase activity [GO:0004672]	Q6R2K3	AT4G03390
A0A2K3MVC5	Trifolium	-0.928	0.0491769	0.855	Down-regulated	Cytochrome p450 93a1-like protein	GO:0004497; GO:0005506; GO:0016020; GO:0016705; GO:0020037		membrane [GO:0016020]	heme binding [GO:0020037]; iron ion binding [GO:0005506]; monooxygenase activity [GO:0004497]; oxidoreductase activity, acting on paired donors, with incorporation or reduction of molecular oxygen [GO:0016705]	F4JDI1	AT3G20120
A0A2K3MVE5	Trifolium	0.105	0.726775	0.973	Unchanged	Methylmalonate-semialdehyde dehydrogenase	GO:0004491			methylmalonate-semialdehyde dehydrogenase (acylating, NAD) activity [GO:0004491]	A8MQR6	#N/A
A0A2K3MVP1	Trifolium	-0.676	0.148077	0.927	Unchanged	Uncharacterized protein					F4K1C7	AT5G26850
A0A2K3MVV8	Trifolium	0.173	0.4634	0.964	Unchanged	ABC-type xenobiotic transporter (EC 7.6.2.2)	GO:0005524; GO:0016020; GO:0016887; GO:0140359		membrane [GO:0016020]	ABC-type transporter activity [GO:0140359]; ATP binding [GO:0005524]; ATP hydrolysis activity [GO:0016887]	Q7DM58	AT2G47800
A0A2K3MWG8	Trifolium	-0.0553	0.916336	0.977	Unchanged	Pectinesterase (EC 3.1.1.11)	GO:0004857; GO:0030599; GO:0042545; GO:0045330; GO:0045490	cell wall modification [GO:0042545]; pectin catabolic process [GO:0045490]		aspartyl esterase activity [GO:0045330]; enzyme inhibitor activity [GO:0004857]; pectinesterase activity [GO:0030599]	Q8RXK7	AT4G02330
A0A2K3MX77	Trifolium	0.518	0.0499883	0.856	Unchanged	25.3 kDa vesicle transport-like protein	GO:0005484; GO:0005789; GO:0005794; GO:0006888; GO:0006890; GO:0007029; GO:0007030; GO:0009553; GO:0009555; GO:0015031	embryo sac development [GO:0009553]; endoplasmic reticulum organization [GO:0007029]; endoplasmic reticulum to Golgi vesicle-mediated transport [GO:0006888]; Golgi organization [GO:0007030]; pollen development [GO:0009555]; protein transport [GO:0015031]; retrograde vesicle-mediated transport, Golgi to endoplasmic reticulum [GO:0006890]	endoplasmic reticulum membrane [GO:0005789]; Golgi apparatus [GO:0005794]	SNAP receptor activity [GO:0005484]	Q94AU2	AT1G11890
A0A2K3MY42	Trifolium	0.0667	0.740815	0.973	Unchanged	1,4-alpha-D-glucan glucanohydrolase					Q94A41	AT1G69830
A0A2K3MY83	Trifolium	0.287	0.662068	0.971	Unchanged	Peptidyl-prolyl cis-trans isomerase (PPIase) (EC 5.2.1.8)	GO:0003755; GO:0006457	protein folding [GO:0006457]		peptidyl-prolyl cis-trans isomerase activity [GO:0003755]	Q9SIH1	AT2G36130
A0A2K3MY85	Trifolium	0.306	0.297763	0.952	Unchanged	Universal stress A-like protein					Q9M9P5	#N/A
A0A2K3MYJ0	Trifolium	0.397	0.167641	0.932	Unchanged	Cullin-3a-like protein	GO:0006511; GO:0031625	ubiquitin-dependent protein catabolic process [GO:0006511]		ubiquitin protein ligase binding [GO:0031625]	Q9ZVH4	AT1G26830
A0A2K3MYN1	Trifolium	-0.874	0.137187	0.923	Unchanged	Thaumatin-like protein					O65638	AT4G36010
A0A2K3MZ68	Trifolium	-0.0307	0.935434	0.977	Unchanged	NAC domain-containing protein	GO:0003677; GO:0005634; GO:0006355; GO:0016020	regulation of DNA-templated transcription [GO:0006355]	membrane [GO:0016020]; nucleus [GO:0005634]	DNA binding [GO:0003677]	F4HPG6	#N/A
A0A2K3N0A3	Trifolium	-0.219	0.547903	0.967	Unchanged	Cysteine-rich receptor-like protein kinase 29-like protein	GO:0004674; GO:0005524; GO:0016020; GO:0016310	phosphorylation [GO:0016310]	membrane [GO:0016020]	ATP binding [GO:0005524]; protein serine/threonine kinase activity [GO:0004674]	A0A2H1ZEN4	#N/A
A0A2K3N0E6	Trifolium	-2.15	1.59718e-05	0.0241	Down-regulated	Uncharacterized protein					Q9FXB5	AT1G56660
A0A2K3N132	Trifolium	-2.03	2.26817e-05	0.0342	Down-regulated	PPM-type phosphatase domain-containing protein	GO:0004722			protein serine/threonine phosphatase activity [GO:0004722]	Q9S9Z7	AT1G34750
A0A2K3N315	Trifolium	0.276	0.423422	0.962	Unchanged	O-acyltransferase WSD1-like protein	GO:0004144; GO:0005886; GO:0019432	triglyceride biosynthetic process [GO:0019432]	plasma membrane [GO:0005886]	diacylglycerol O-acyltransferase activity [GO:0004144]	Q9M3B3	AT3G49190
A0A2K3N3Q6	Trifolium	0.425	0.190659	0.937	Unchanged	NADH-dependent glutamate synthase					Q9LV03	AT5G53460
A0A2K3N443	Trifolium	-0.396	0.248146	0.946	Unchanged	aminocyclopropanecarboxylate oxidase (EC 1.14.17.4) (Ethylene-forming enzyme)	GO:0009693; GO:0016491; GO:0046872	ethylene biosynthetic process [GO:0009693]		metal ion binding [GO:0046872]; oxidoreductase activity [GO:0016491]	Q06588	AT1G05010
A0A2K3N4R6	Trifolium	0.668	0.134404	0.922	Unchanged	Cox viia-like protein	GO:0005743		mitochondrial inner membrane [GO:0005743]		Q944S8	#N/A
A0A2K3N5B4	Trifolium	-0.0571	0.883362	0.976	Unchanged	Inorganic phosphate transporter	GO:0005315; GO:0006817; GO:0016020	phosphate ion transport [GO:0006817]	membrane [GO:0016020]	inorganic phosphate transmembrane transporter activity [GO:0005315]	O48639	AT5G43360
A0A2K3N674	Trifolium	1.43	0.016216	0.719	Up-regulated	Plastid division protein PDV2-like	GO:0009707; GO:0009739; GO:0010020; GO:0070273	chloroplast fission [GO:0010020]; response to gibberellin [GO:0009739]	chloroplast outer membrane [GO:0009707]	phosphatidylinositol-4-phosphate binding [GO:0070273]	Q9XII1	AT2G16070
A0A2K3N682	Trifolium	0.348	0.346669	0.956	Unchanged	Chaperone protein dnaJ					Q9SLA7	AT2G25560
A0A2K3N6B3	Trifolium	-1.29	0.000789594	0.315	Down-regulated	Transcription factor (bHLH transcription factor) (Basic helix-loop-helix protein)	GO:0003700; GO:0005634; GO:0046983		nucleus [GO:0005634]	DNA-binding transcription factor activity [GO:0003700]; protein dimerization activity [GO:0046983]	O23487	AT4G16430
A0A2K3N6M8	Trifolium	-0.536	0.148993	0.927	Unchanged	Putative RNA ligase	GO:0003972; GO:0006388	tRNA splicing, via endonucleolytic cleavage and ligation [GO:0006388]		RNA ligase (ATP) activity [GO:0003972]	Q0WL81	AT1G07910
A0A2K3N6Q0	Trifolium	-0.147	0.796315	0.974	Unchanged	Isoflavonoid malonyl transferase	GO:0016740			transferase activity [GO:0016740]	Q940Z5	AT5G39050
A0A2K3N7J4	Trifolium	-0.0286	0.896235	0.976	Unchanged	Serine/threonine-protein phosphatase	GO:0010073	meristem maintenance [GO:0010073]			Q9C6J9	AT1G50790
A0A2K3N8B6	Trifolium	-2.16	0.000869631	0.329	Down-regulated	Glycosyltransferase (EC 2.4.1.-)	GO:0008194			UDP-glycosyltransferase activity [GO:0008194]	Q9M156	AT4G01070
A0A2K3N8M8	Trifolium	-1.06	0.00892555	0.653	Down-regulated	Subtilisin-like protease-like protein	GO:0004252; GO:0006508; GO:0009610; GO:0048046	proteolysis [GO:0006508]; response to symbiotic fungus [GO:0009610]	apoplast [GO:0048046]	serine-type endopeptidase activity [GO:0004252]	Q9LVJ1	AT3G14067
A0A2K3N8U6	Trifolium	0.238	0.289668	0.951	Unchanged	Putative nucleolar protein 5-2-like protein	GO:0005730; GO:0030515; GO:0031428; GO:0032040; GO:0042254	ribosome biogenesis [GO:0042254]	box C/D RNP complex [GO:0031428]; nucleolus [GO:0005730]; small-subunit processome [GO:0032040]	snoRNA binding [GO:0030515]	O04658	AT5G27120
A0A2K3NAN3	Trifolium	0.781	0.115967	0.915	Unchanged	Cytochrome p450 71a1-like protein	GO:0004497; GO:0005506; GO:0016020; GO:0016705; GO:0020037		membrane [GO:0016020]	heme binding [GO:0020037]; iron ion binding [GO:0005506]; monooxygenase activity [GO:0004497]; oxidoreductase activity, acting on paired donors, with incorporation or reduction of molecular oxygen [GO:0016705]	Q9LTL8	AT3G26230
A0A2K3NB11	Trifolium	-0.572	0.00855556	0.649	Unchanged	Reticulon-like protein	GO:0005789		endoplasmic reticulum membrane [GO:0005789]		Q9SUT9	AT4G11220
A0A2K3NCQ8	Trifolium	-0.466	0.201253	0.939	Unchanged	Ammonium transporter	GO:0005886; GO:0008519		plasma membrane [GO:0005886]	ammonium transmembrane transporter activity [GO:0008519]	P54144	AT4G13510
A0A2K3NDF9	Trifolium	1.31	0.00866187	0.65	Up-regulated	peroxidase (EC 1.11.1.7)	GO:0006979; GO:0020037; GO:0042744; GO:0046872; GO:0140825	hydrogen peroxide catabolic process [GO:0042744]; response to oxidative stress [GO:0006979]		heme binding [GO:0020037]; lactoperoxidase activity [GO:0140825]; metal ion binding [GO:0046872]	Q42578	AT5G06720
A0A2K3NDK7	Trifolium	-0.17	0.566399	0.968	Unchanged	40S ribosomal protein s29-like	GO:0003735; GO:0005840; GO:0006412; GO:0008270; GO:1990904	translation [GO:0006412]	ribonucleoprotein complex [GO:1990904]; ribosome [GO:0005840]	structural constituent of ribosome [GO:0003735]; zinc ion binding [GO:0008270]	Q680P8	AT4G33865
A0A2K3NDU0	Trifolium	0.959	0.00987636	0.663	Up-regulated	Acidic leucine-rich nuclear phosphoprotein 32-related					Q9SCQ7	AT3G50690
A0A2K3NE01	Trifolium	-0.575	0.211505	0.941	Unchanged	Beta-galactosidase (EC 3.2.1.23)	GO:0004565; GO:0016020; GO:0016760; GO:0030244	cellulose biosynthetic process [GO:0030244]	membrane [GO:0016020]	beta-galactosidase activity [GO:0004565]; cellulose synthase (UDP-forming) activity [GO:0016760]	Q9SCV5	AT5G20710
A0A2K3NET2	Trifolium	-1.2	0.0793181	0.892	Unchanged	Equilibrative nucleotide transporter 3-like protein	GO:0005337; GO:0016020		membrane [GO:0016020]	nucleoside transmembrane transporter activity [GO:0005337]	Q9M0Y3	AT4G05120
A0A2K3NEV4	Trifolium	1.26	0.0933176	0.902	Unchanged	Uncharacterized protein					#N/A	#N/A
A0A2K3NFD6	Trifolium	1.02	0.0402386	0.836	Up-regulated	Glycosyltransferase (EC 2.4.1.-)	GO:0008194			UDP-glycosyltransferase activity [GO:0008194]	O23406	AT4G15550
A0A2K3NFJ0	Trifolium	0.69	0.145536	0.926	Unchanged	Spatacsin C-terminal domain-containing protein					A0A1P8B3P8	#N/A
A0A2K3NGI1	Trifolium	1.23	0.00898563	0.654	Up-regulated	GDSL esterase/lipase	GO:0016788			hydrolase activity, acting on ester bonds [GO:0016788]	Q9FXB6	AT1G56670
A0A2K3NGS9	Trifolium	-0.35	0.101779	0.907	Unchanged	Sphingomyelin synthase-like domain-containing protein	GO:0006665; GO:0016020; GO:0016780	sphingolipid metabolic process [GO:0006665]	membrane [GO:0016020]	phosphotransferase activity, for other substituted phosphate groups [GO:0016780]	Q9XIG2	AT1G43580
A0A2K3NGT5	Trifolium	-1.94	0.00029684	0.188	Down-regulated	SGT1-1	GO:0051087			protein-folding chaperone binding [GO:0051087]	Q9SUT5	AT4G11260
A0A2K3NHF9	Trifolium	-0.172	0.68551	0.972	Unchanged	Pectinesterase (EC 3.1.1.11)	GO:0030599; GO:0042545; GO:0045330; GO:0045490	cell wall modification [GO:0042545]; pectin catabolic process [GO:0045490]		aspartyl esterase activity [GO:0045330]; pectinesterase activity [GO:0030599]	Q9LVQ0	AT3G29090
A0A2K3NJ65	Trifolium	-0.226	0.689881	0.972	Unchanged	Thaumatin-like protein					P50700	AT4G11650
A0A2K3NJB6	Trifolium	0.786	0.0147419	0.707	Up-regulated	Heat shock cognate 70 kDa	GO:0005524; GO:0140662			ATP binding [GO:0005524]; ATP-dependent protein folding chaperone [GO:0140662]	P22953	AT5G02500
A0A2K3NJI6	Trifolium	-2.32	1.23279e-05	0.0241	Down-regulated	Benzyl alcohol O-benzoyltransferase-like protein	GO:0016740			transferase activity [GO:0016740]	Q9LF70	AT5G17540
A0A2K3NKU1	Trifolium	0.164	0.566858	0.968	Unchanged	Cinnamyl alcohol dehydrogenase	GO:0008270; GO:0009809; GO:0016616	lignin biosynthetic process [GO:0009809]		oxidoreductase activity, acting on the CH-OH group of donors, NAD or NADP as acceptor [GO:0016616]; zinc ion binding [GO:0008270]	Q02971	AT4G37980
A0A2K3NLH3	Trifolium	-0.174	0.489465	0.965	Unchanged	Isoamylase 2 chloroplastic-like	GO:0009507; GO:0019156; GO:0019252	starch biosynthetic process [GO:0019252]	chloroplast [GO:0009507]	isoamylase activity [GO:0019156]	Q8L735	AT1G03310
A0A2K3NLX3	Trifolium	-2.23	0.000143321	0.139	Down-regulated	ABC transporter B family member	GO:0005524; GO:0016020; GO:0016887; GO:0140359		membrane [GO:0016020]	ABC-type transporter activity [GO:0140359]; ATP binding [GO:0005524]; ATP hydrolysis activity [GO:0016887]	Q9M1Q9	AT3G62150
A0A2K3NM85	Trifolium	0.417	0.202974	0.939	Unchanged	asparagine synthase (glutamine-hydrolyzing) (EC 6.3.5.4)	GO:0004066; GO:0005524; GO:0006529; GO:0006541	asparagine biosynthetic process [GO:0006529]; glutamine metabolic process [GO:0006541]		asparagine synthase (glutamine-hydrolyzing) activity [GO:0004066]; ATP binding [GO:0005524]	P49078	AT3G47340
A0A2K3NMI8	Trifolium	-0.179	0.443917	0.963	Unchanged	Sucrose synthase (EC 2.4.1.13)	GO:0005985; GO:0016157	sucrose metabolic process [GO:0005985]		sucrose synthase activity [GO:0016157]	Q9LXL5	AT3G43190
A0A2K3NMJ8	Trifolium	0.242	0.547677	0.967	Unchanged	Cellulose synthase A catalytic subunit 3	GO:0016020; GO:0016760; GO:0030244	cellulose biosynthetic process [GO:0030244]	membrane [GO:0016020]	cellulose synthase (UDP-forming) activity [GO:0016760]	Q941L0	AT5G05170
A0A2K3NNR7	Trifolium	-0.227	0.417826	0.961	Unchanged	Hydroxymethylglutaryl-CoA synthase (HMG-CoA synthase) (EC 2.3.3.10) (3-hydroxy-3-methylglutaryl coenzyme A synthase)	GO:0004421; GO:0006084; GO:0010142; GO:0016126	acetyl-CoA metabolic process [GO:0006084]; farnesyl diphosphate biosynthetic process, mevalonate pathway [GO:0010142]; sterol biosynthetic process [GO:0016126]		hydroxymethylglutaryl-CoA synthase activity [GO:0004421]	P54873	AT4G11820
A0A2K3NNS5	Trifolium	-0.321	0.494562	0.965	Unchanged	Myosin-H heavy chain-like protein	GO:0003774; GO:0003779; GO:0005516; GO:0005524; GO:0016459; GO:0030048	actin filament-based movement [GO:0030048]	myosin complex [GO:0016459]	actin binding [GO:0003779]; ATP binding [GO:0005524]; calmodulin binding [GO:0005516]; cytoskeletal motor activity [GO:0003774]	A0A1P8AXP2	#N/A
A0A2K3NNY4	Trifolium	-1.74	0.017612	0.73	Down-regulated	tRNA/rRNA methyltransferase SpoU family protein	GO:0008168; GO:0032259	methylation [GO:0032259]		methyltransferase activity [GO:0008168]	A0A1P8B800	#N/A
A0A2K3NP15	Trifolium	0.355	0.163015	0.931	Unchanged	Nuclear matrix constituent protein 1-like	GO:0005652; GO:0006997	nucleus organization [GO:0006997]	nuclear lamina [GO:0005652]		F4HRT5	AT1G67230
A0A2K3NPC2	Trifolium	-0.165	0.51744	0.966	Unchanged	Rac-like GTP-binding protein RHO1-like	GO:0003924; GO:0005525; GO:0007264	small GTPase mediated signal transduction [GO:0007264]		GTP binding [GO:0005525]; GTPase activity [GO:0003924]	Q38902	AT2G17800
A0A2K3NPS8	Trifolium	-1.03	0.00628624	0.613	Down-regulated	Iron-sulfur protein nubpl-like	GO:0005524; GO:0016226; GO:0051536; GO:0140663	iron-sulfur cluster assembly [GO:0016226]		ATP binding [GO:0005524]; ATP-dependent FeS chaperone activity [GO:0140663]; iron-sulfur cluster binding [GO:0051536]	O49472	AT4G19540
A0A2K3NQ33	Trifolium	-0.03	0.904827	0.976	Unchanged	TLDc domain-containing protein					Q9FKA3	AT5G39590
A0A2K3NQF0	Trifolium	1.45	0.0122499	0.683	Up-regulated	Uncharacterized protein					A0A1I9LR13	AT3G05900
A0A2K3NQF9	Trifolium	-0.69	0.0391543	0.833	Down-regulated	cyclin-dependent kinase (EC 2.7.11.22)	GO:0004674; GO:0005524; GO:0016310; GO:0051301	cell division [GO:0051301]; phosphorylation [GO:0016310]		ATP binding [GO:0005524]; protein serine/threonine kinase activity [GO:0004674]	P24100	AT3G48750
A0A2K3NQZ2	Trifolium	0.164	0.520149	0.966	Unchanged	Ubiquitin carboxyl-terminal hydrolase 3-like protein	GO:0004843			cysteine-type deubiquitinase activity [GO:0004843]	O24454	AT4G39910
A0A2K3NRQ9	Trifolium	-0.821	0.0369816	0.827	Down-regulated	tRNA uridine 5-carboxymethylaminomethyl modification enzyme mnmG-like protein	GO:0002098; GO:0050660	tRNA wobble uridine modification [GO:0002098]		flavin adenine dinucleotide binding [GO:0050660]	Q9SHS2	AT2G13440
A0A2K3NSI3	Trifolium	-0.617	0.0103089	0.667	Down-regulated	Glutamate--cysteine ligase (EC 6.3.2.2)	GO:0004357; GO:0005524; GO:0006750; GO:0009507; GO:0042398	cellular modified amino acid biosynthetic process [GO:0042398]; glutathione biosynthetic process [GO:0006750]	chloroplast [GO:0009507]	ATP binding [GO:0005524]; glutamate-cysteine ligase activity [GO:0004357]	P46309	AT4G23100
A0A2K3NSQ2	Trifolium	0.305	0.243739	0.946	Unchanged	glutamate synthase (NADH) (EC 1.4.1.14)	GO:0005506; GO:0006541; GO:0010181; GO:0016040; GO:0050660; GO:0051538; GO:0097054	glutamine metabolic process [GO:0006541]; L-glutamate biosynthetic process [GO:0097054]		3 iron, 4 sulfur cluster binding [GO:0051538]; flavin adenine dinucleotide binding [GO:0050660]; FMN binding [GO:0010181]; glutamate synthase (NADH) activity [GO:0016040]; iron ion binding [GO:0005506]	Q9LV03	AT5G53460
A0A2K3NSR3	Trifolium	0.0731	0.787734	0.974	Unchanged	Glycosyltransferase (EC 2.4.1.-)	GO:0008194; GO:0046527			glucosyltransferase activity [GO:0046527]; UDP-glycosyltransferase activity [GO:0008194]	Q9LSY8	AT3G21760
A0A2K3NTD8	Trifolium	0.432	0.226871	0.943	Unchanged	Long chain acyl-CoA synthetase 4-like protein					Q9T009	AT4G11030
A0A2K3NUA4	Trifolium	-0.23	0.647199	0.971	Unchanged	phosphoenolpyruvate carboxykinase (ATP) (EC 4.1.1.49)	GO:0004612; GO:0005524; GO:0006094; GO:0016301; GO:0016310	gluconeogenesis [GO:0006094]; phosphorylation [GO:0016310]		ATP binding [GO:0005524]; kinase activity [GO:0016301]; phosphoenolpyruvate carboxykinase (ATP) activity [GO:0004612]	Q9T074	AT4G37870
A0A2K3NUL2	Trifolium	0.976	0.0026285	0.495	Up-regulated	Protein argonaute 4-like	GO:0003723; GO:0031047; GO:1990904	regulatory ncRNA-mediated gene silencing [GO:0031047]	ribonucleoprotein complex [GO:1990904]	RNA binding [GO:0003723]	Q9ZVD5	AT2G27040
A0A2K3NUN0	Trifolium	-0.465	0.266606	0.949	Unchanged	Lysine-specific demethylase 3B	GO:0005634; GO:0008168; GO:0032259; GO:0032454	methylation [GO:0032259]	nucleus [GO:0005634]	histone H3K9 demethylase activity [GO:0032454]; methyltransferase activity [GO:0008168]	Q8VYB9	AT4G00990
A0A2K3NV83	Trifolium	0.0173	0.965019	0.977	Unchanged	Alpha-dioxygenase 1-like protein	GO:0004601; GO:0006633; GO:0006979; GO:0020037; GO:0031408; GO:0046872; GO:0051213	fatty acid biosynthetic process [GO:0006633]; oxylipin biosynthetic process [GO:0031408]; response to oxidative stress [GO:0006979]		dioxygenase activity [GO:0051213]; heme binding [GO:0020037]; metal ion binding [GO:0046872]; peroxidase activity [GO:0004601]	Q9SGH6	AT3G01420
A0A2K3NVM5	Trifolium	0.137	0.74604	0.973	Unchanged	chitinase (EC 3.2.1.14)	GO:0000272; GO:0004568; GO:0006032; GO:0006952; GO:0008061; GO:0016998	cell wall macromolecule catabolic process [GO:0016998]; chitin catabolic process [GO:0006032]; defense response [GO:0006952]; polysaccharide catabolic process [GO:0000272]		chitin binding [GO:0008061]; chitinase activity [GO:0004568]	P19171	AT3G12500
A0A2K3NVS9	Trifolium	-0.546	0.147931	0.926	Unchanged	Pyrimidine-specific ribonucleoside hydrolase rihB	GO:0006139; GO:0016799; GO:1901564	nucleobase-containing compound metabolic process [GO:0006139]; organonitrogen compound metabolic process [GO:1901564]		hydrolase activity, hydrolyzing N-glycosyl compounds [GO:0016799]	Q8RY23	AT5G18860
A0A2K3NW10	Trifolium	-0.558	0.0191088	0.743	Unchanged	SUMO-activating enzyme subunit	GO:0005524; GO:0016925; GO:0019948; GO:0031510; GO:0046872	protein sumoylation [GO:0016925]	SUMO activating enzyme complex [GO:0031510]	ATP binding [GO:0005524]; metal ion binding [GO:0046872]; SUMO activating enzyme activity [GO:0019948]	F4IHI1	#N/A
A0A2K3NWA1	Trifolium	-1.85	0.00102998	0.352	Down-regulated	Uncharacterized protein					#N/A	#N/A
A0A2K3NWM7	Trifolium	-1.02	0.0588006	0.87	Unchanged	Glycosyltransferase (EC 2.4.1.-)	GO:0008194			UDP-glycosyltransferase activity [GO:0008194]	Q9ZQ97	AT2G36770
A0A2K3NWU2	Trifolium	-0.473	0.421722	0.961	Unchanged	Small glutamine-rich tetratricopeptide repeat-containing					F4JG04	#N/A
A0A2K3NWY6	Trifolium	-0.292	0.178927	0.935	Unchanged	protein-serine/threonine phosphatase (EC 3.1.3.16)	GO:0017018; GO:0046872			metal ion binding [GO:0046872]; myosin phosphatase activity [GO:0017018]	Q9SZ53	AT4G31860
A0A2K3NY70	Trifolium	2.53	8.63948e-05	0.107	Up-regulated	BOS complex subunit TMEM147 (Transmembrane protein 147)	GO:0016020		membrane [GO:0016020]		Q9SX96	AT1G47640
A0A2K3NYP8	Trifolium	0.159	0.568424	0.968	Unchanged	Polyadenylate-binding protein rbp47c-like	GO:0003729; GO:0005634; GO:0006397	mRNA processing [GO:0006397]	nucleus [GO:0005634]	mRNA binding [GO:0003729]	Q9SX79	AT1G47490
A0A2K3NYU5	Trifolium	-0.216	0.242323	0.946	Unchanged	UDP-glucuronate decarboxylase (EC 4.1.1.35)	GO:0016020; GO:0033320; GO:0042732; GO:0048040; GO:0070403	D-xylose metabolic process [GO:0042732]; UDP-D-xylose biosynthetic process [GO:0033320]	membrane [GO:0016020]	NAD+ binding [GO:0070403]; UDP-glucuronate decarboxylase activity [GO:0048040]	Q9LZI2	AT3G62830
A0A2K3P0H7	Trifolium	0.334	0.150772	0.927	Unchanged	Alpha,alpha-trehalose-phosphate synthase	GO:0003824; GO:0005992	trehalose biosynthetic process [GO:0005992]		catalytic activity [GO:0003824]	Q94AH8	AT1G68020
A0A2K3P0Q2	Trifolium	-0.198	0.770527	0.974	Unchanged	Cytochrome p450 83b1-like protein	GO:0004497; GO:0005506; GO:0016020; GO:0016705; GO:0020037		membrane [GO:0016020]	heme binding [GO:0020037]; iron ion binding [GO:0005506]; monooxygenase activity [GO:0004497]; oxidoreductase activity, acting on paired donors, with incorporation or reduction of molecular oxygen [GO:0016705]	Q9LIP3	AT3G26330
A0A2K3P0Q6	Trifolium	-0.162	0.691045	0.972	Unchanged	non-specific serine/threonine protein kinase (EC 2.7.11.1)	GO:0004674; GO:0005524; GO:0016310	phosphorylation [GO:0016310]		ATP binding [GO:0005524]; protein serine/threonine kinase activity [GO:0004674]	Q93Z18	AT4G28880
A0A2K3P1E0	Trifolium	-0.246	0.491238	0.965	Unchanged	Glucosyltransferase	GO:0008194			UDP-glycosyltransferase activity [GO:0008194]	Q940V3	AT2G22590
A0A2K3P1R8	Trifolium	0.349	0.162057	0.931	Unchanged	Neutral ceramidase (EC 3.5.1.23)	GO:0017040; GO:0046514; GO:0102121	ceramide catabolic process [GO:0046514]		ceramidase activity [GO:0102121]; N-acylsphingosine amidohydrolase activity [GO:0017040]	A0A1P8APY2	#N/A
A0A2K3P1R9	Trifolium	-1.97	0.00027505	0.183	Down-regulated	Methyltransferase (EC 2.1.1.-)	GO:0008168; GO:0016020; GO:0032259	methylation [GO:0032259]	membrane [GO:0016020]	methyltransferase activity [GO:0008168]	O22285	AT2G39750
A0A2K3P273	Trifolium	-0.244	0.218089	0.942	Unchanged	ABC transporter C family member 2-like protein	GO:0005524; GO:0016020; GO:0140359		membrane [GO:0016020]	ABC-type transporter activity [GO:0140359]; ATP binding [GO:0005524]	Q9C8G9	AT1G30400
A0A2K3P324	Trifolium	-0.836	0.00321005	0.519	Down-regulated	Protein MOR1-like	GO:0007051; GO:0030951; GO:0046785; GO:0051010; GO:0061863	establishment or maintenance of microtubule cytoskeleton polarity [GO:0030951]; microtubule polymerization [GO:0046785]; spindle organization [GO:0007051]		microtubule plus end polymerase [GO:0061863]; microtubule plus-end binding [GO:0051010]	A0A1P8B2A9	#N/A
A0A2K3P329	Trifolium	-0.481	0.473901	0.964	Unchanged	Estradiol 17-beta-dehydrogenase	GO:0003676; GO:0004523			nucleic acid binding [GO:0003676]; RNA-DNA hybrid ribonuclease activity [GO:0004523]	#N/A	#N/A
A0A2K3P357	Trifolium	-0.282	0.250749	0.947	Unchanged	Dolichyl-diphosphooligosaccharide-protein glycosyltransferase	GO:0004576; GO:0006486; GO:0016020; GO:0046872	protein glycosylation [GO:0006486]	membrane [GO:0016020]	metal ion binding [GO:0046872]; oligosaccharyl transferase activity [GO:0004576]	Q9FX21	AT1G34130
A0A2K3P3J6	Trifolium	0.62	0.0521264	0.86	Unchanged	Pentatricopeptide repeat-containing protein chloroplastic-like	GO:0008380	RNA splicing [GO:0008380]			Q9STK5	AT3G48250
A0A2K3P3R9	Trifolium	0.743	0.190758	0.937	Unchanged	Ubiquinol oxidase (EC 1.10.3.11)	GO:0009916; GO:0043229; GO:0046872; GO:0070469; GO:0102721; GO:0106292		intracellular organelle [GO:0043229]; respirasome [GO:0070469]	alternative oxidase activity [GO:0009916]; metal ion binding [GO:0046872]; superoxide-generating NADPH oxidase activity [GO:0106292]; ubiquinol:oxygen oxidoreductase activity [GO:0102721]	Q56X52	AT4G22260
A0A2K3P3S4	Trifolium	0.203	0.296281	0.952	Unchanged	Granule-bound starch synthase chloroplastic/amyloplastic-like	GO:0004373; GO:0009507; GO:0019252	starch biosynthetic process [GO:0019252]	chloroplast [GO:0009507]	glycogen (starch) synthase activity [GO:0004373]	Q9MAC8	AT3G01180
A0A2K3P4B6	Trifolium	0.607	0.312982	0.954	Unchanged	Delta-1-pyrroline-5-carboxylate synthase-like protein	GO:0004349; GO:0004350; GO:0005524; GO:0016310; GO:0055129	L-proline biosynthetic process [GO:0055129]; phosphorylation [GO:0016310]		ATP binding [GO:0005524]; glutamate 5-kinase activity [GO:0004349]; glutamate-5-semialdehyde dehydrogenase activity [GO:0004350]	P54888	AT3G55610
A0A2K3P4L8	Trifolium	0.126	0.635304	0.97	Unchanged	Uncharacterized protein					Q940I8	AT4G16100
A0A2K3P4S1	Trifolium	-0.348	0.141129	0.924	Unchanged	Putative serine threonine-protein kinase	GO:0004672; GO:0005524; GO:0005886; GO:0009742; GO:0016310	brassinosteroid mediated signaling pathway [GO:0009742]; phosphorylation [GO:0016310]	plasma membrane [GO:0005886]	ATP binding [GO:0005524]; protein kinase activity [GO:0004672]	Q9LS26	AT5G46570
A0A2K3P5I9	Trifolium	-0.143	0.487491	0.965	Unchanged	TPR protein	GO:0005739; GO:0010073; GO:1901703	meristem maintenance [GO:0010073]; protein localization involved in auxin polar transport [GO:1901703]	mitochondrion [GO:0005739]		Q9LZL9	AT5G02130
A0A2K3P5U0	Trifolium	0.0879	0.713976	0.972	Unchanged	Calcineurin B-like protein	GO:0005509; GO:0016020; GO:0019722; GO:0019900	calcium-mediated signaling [GO:0019722]	membrane [GO:0016020]	calcium ion binding [GO:0005509]; kinase binding [GO:0019900]	Q8LEM7	AT4G26570
A0A2K3P6N3	Trifolium	2.16	0.0249915	0.781	Up-regulated	Putative disease resistance protein	GO:0043531; GO:0050832	defense response to fungus [GO:0050832]		ADP binding [GO:0043531]	Q9FKZ1	AT5G66900
A0A2K3P6P8	Trifolium	-0.433	0.179165	0.935	Unchanged	Canopy-like protein					F4I9G7	#N/A
A0A2K3P7I7	Trifolium	-2.02	9.96863e-05	0.117	Down-regulated	DNA binding protein	GO:0003677; GO:0005634; GO:0046872; GO:0046983		nucleus [GO:0005634]	DNA binding [GO:0003677]; metal ion binding [GO:0046872]; protein dimerization activity [GO:0046983]	F4JJC1	AT4G15020
A0A2K3P7K7	Trifolium	0.307	0.33984	0.956	Unchanged	Plastid division protein CDP1 chloroplastic-like	GO:0009507; GO:0009528; GO:0010020; GO:0043621	chloroplast fission [GO:0010020]	chloroplast [GO:0009507]; plastid inner membrane [GO:0009528]	protein self-association [GO:0043621]	Q8VY16	AT3G19180
A0A2K3P7P6	Trifolium	-0.35	0.451705	0.963	Unchanged	Polygalacturonase	GO:0004650; GO:0005975	carbohydrate metabolic process [GO:0005975]		polygalacturonase activity [GO:0004650]	Q949Z1	AT1G48100
A0A2K3P821	Trifolium	-0.513	0.76509	0.974	Unchanged	G-type lectin S-receptor-like serine/threonine-protein kinase	GO:0003955; GO:0004674; GO:0005524; GO:0010181; GO:0016020; GO:0016310; GO:0030246; GO:0048544	phosphorylation [GO:0016310]; recognition of pollen [GO:0048544]	membrane [GO:0016020]	ATP binding [GO:0005524]; carbohydrate binding [GO:0030246]; FMN binding [GO:0010181]; NAD(P)H dehydrogenase (quinone) activity [GO:0003955]; protein serine/threonine kinase activity [GO:0004674]	A0A178V0J5	#N/A
A0A2K3P8B8	Trifolium	-0.288	0.15239	0.928	Unchanged	Phospho-2-dehydro-3-deoxyheptonate aldolase (EC 2.5.1.54)	GO:0003849; GO:0008652; GO:0009073; GO:0009423; GO:0009507	amino acid biosynthetic process [GO:0008652]; aromatic amino acid family biosynthetic process [GO:0009073]; chorismate biosynthetic process [GO:0009423]	chloroplast [GO:0009507]	3-deoxy-7-phosphoheptulonate synthase activity [GO:0003849]	Q9SK84	AT1G22410
A0A2K3P9B7	Trifolium	-0.137	0.463092	0.964	Unchanged	Polyadenylate-binding protein rbp47-like	GO:0003729; GO:0005634; GO:0006397	mRNA processing [GO:0006397]	nucleus [GO:0005634]	mRNA binding [GO:0003729]	Q0WW84	AT3G19130
A0A2K3P9X6	Trifolium	0.237	0.638746	0.97	Unchanged	Putative polygalacturonase-like protein	GO:0004650; GO:0005975	carbohydrate metabolic process [GO:0005975]		polygalacturonase activity [GO:0004650]	Q8RWK6	#N/A
A0A2K3PA23	Trifolium	-1.68	0.00603407	0.608	Down-regulated	U3 small nucleolar RNA-associated protein	GO:0005634		nucleus [GO:0005634]		Q9C8Z4	AT3G06530
A0A2K3PA35	Trifolium	-0.584	0.0064366	0.616	Unchanged	Calmodulin-binding protein	GO:0003677; GO:0005516; GO:0005634		nucleus [GO:0005634]	calmodulin binding [GO:0005516]; DNA binding [GO:0003677]	A0A1P8B0C9	#N/A
A0A2K3PAP8	Trifolium	0.3	0.389106	0.959	Unchanged	SH3 domain protein	GO:0016020		membrane [GO:0016020]		Q8VWF1	AT4G34660
A0A2K3PBI2	Trifolium	0.543	0.0634692	0.876	Unchanged	Sodium/hydrogen exchanger	GO:0006885; GO:0015385; GO:0016020	regulation of pH [GO:0006885]	membrane [GO:0016020]	sodium:proton antiporter activity [GO:0015385]	Q56XP4	AT3G05030
A0A2K3PBY0	Trifolium	-0.371	0.214378	0.941	Unchanged	Glycine-rich protein 2b-like	GO:0003676; GO:0008270			nucleic acid binding [GO:0003676]; zinc ion binding [GO:0008270]	Q38896	AT2G21060
A0A2K3PCB9	Trifolium	-0.235	0.518635	0.966	Unchanged	Cysteine-rich receptor-like protein kinase	GO:0004674; GO:0005524; GO:0016020; GO:0016310	phosphorylation [GO:0016310]	membrane [GO:0016020]	ATP binding [GO:0005524]; protein serine/threonine kinase activity [GO:0004674]	Q9M0X5	AT4G05200
A0A2K3PCV5	Trifolium	0.275	0.229862	0.944	Unchanged	Golgi SNAP receptor complex member 1-2-like protein	GO:0000139; GO:0005801; GO:0006888; GO:0015031	endoplasmic reticulum to Golgi vesicle-mediated transport [GO:0006888]; protein transport [GO:0015031]	cis-Golgi network [GO:0005801]; Golgi membrane [GO:0000139]		O22151	AT2G45200
A0A2K3PD00	Trifolium	0.494	0.0824285	0.895	Unchanged	AP complex subunit sigma	GO:0005802; GO:0006886; GO:0030124	intracellular protein transport [GO:0006886]	AP-4 adaptor complex [GO:0030124]; trans-Golgi network [GO:0005802]		O82201	AT2G19790
A0A2K3PDH4	Trifolium	-0.00347	0.987906	0.978	Unchanged	Ferritin (EC 1.16.3.1)	GO:0004322; GO:0006826; GO:0006879; GO:0008199; GO:0009536	intracellular iron ion homeostasis [GO:0006879]; iron ion transport [GO:0006826]	plastid [GO:0009536]	ferric iron binding [GO:0008199]; ferroxidase activity [GO:0004322]	Q9SRL5	AT3G11050
A0A2K3PDL8	Trifolium	1.09	0.0293796	0.801	Up-regulated	Glycine-rich RNA-binding protein mitochondrial-like	GO:0003723			RNA binding [GO:0003723]	Q9FNR1	AT5G61030
A0A2K3PDN4	Trifolium	0.561	0.199613	0.939	Unchanged	Pollen-specific protein SF3-like	GO:0005856; GO:0046872; GO:0051015; GO:0051017	actin filament bundle assembly [GO:0051017]	cytoskeleton [GO:0005856]	actin filament binding [GO:0051015]; metal ion binding [GO:0046872]	Q9M047	AT3G55770
A0A2K3PFM4	Trifolium	-0.353	0.246738	0.946	Unchanged	Protein SIEVE ELEMENT OCCLUSION B-like	GO:0010088	phloem development [GO:0010088]			Q9SS87	AT3G01680
A0A2K3PFZ1	Trifolium	-0.0284	0.928506	0.977	Unchanged	sucrose synthase (EC 2.4.1.13)	GO:0005985; GO:0016157	sucrose metabolic process [GO:0005985]		sucrose synthase activity [GO:0016157]	Q9FX32	AT1G73370
A0A2K3PG12	Trifolium	-0.247	0.556368	0.968	Unchanged	guanylate kinase (EC 2.7.4.8)	GO:0004385; GO:0005524; GO:0016310	phosphorylation [GO:0016310]		ATP binding [GO:0005524]; guanylate kinase activity [GO:0004385]	F4J3E9	#N/A
A0A2K3PH32	Trifolium	0.275	0.368309	0.958	Unchanged	phosphoenolpyruvate carboxylase (EC 4.1.1.31)	GO:0005737; GO:0006099; GO:0008964; GO:0015977	carbon fixation [GO:0015977]; tricarboxylic acid cycle [GO:0006099]	cytoplasm [GO:0005737]	phosphoenolpyruvate carboxylase activity [GO:0008964]	Q9MAH0	AT1G53310
A0A2K3PHC0	Trifolium	2.04	0.0239107	0.775	Up-regulated	Protein decapping 5-like					Q9C658	AT1G26110
A0A2K3PHE2	Trifolium	-2.25	0.000222637	0.169	Down-regulated	Aldo/keto reductase					Q93ZN2	AT1G60710
A0A2K3PHU5	Trifolium	0.326	0.239733	0.945	Unchanged	40S ribosomal protein s27-2-like	GO:0003735; GO:0005840; GO:0006412	translation [GO:0006412]	ribosome [GO:0005840]	structural constituent of ribosome [GO:0003735]	Q9M2F1	AT3G61110
A0A2K3PHY0	Trifolium	0.193	0.379565	0.959	Unchanged	Amine oxidase (EC 1.4.3.-)	GO:0005507; GO:0009308; GO:0042221; GO:0048038; GO:0052593; GO:0052594; GO:0052596	amine metabolic process [GO:0009308]; response to chemical [GO:0042221]		aminoacetone:oxygen oxidoreductase(deaminating) activity [GO:0052594]; copper ion binding [GO:0005507]; phenethylamine:oxygen oxidoreductase (deaminating) activity [GO:0052596]; quinone binding [GO:0048038]; tryptamine:oxygen oxidoreductase (deaminating) activity [GO:0052593]	Q8L866	AT2G42490
A0A2K3PI60	Trifolium	0.728	0.0105832	0.67	Up-regulated	Choline transporter-like protein	GO:0005886; GO:0022857		plasma membrane [GO:0005886]	transmembrane transporter activity [GO:0022857]	Q94AN2	AT3G15380
A0A2K3PIY2	Trifolium	-0.496	0.0869426	0.898	Unchanged	1-acylglycerol-3-phosphate O-acyltransferase (EC 2.3.1.51)	GO:0003841; GO:0016020; GO:0016024	CDP-diacylglycerol biosynthetic process [GO:0016024]	membrane [GO:0016020]	1-acylglycerol-3-phosphate O-acyltransferase activity [GO:0003841]	Q8LG50	AT3G57650
A0A2K3PJ58	Trifolium	1.06	0.0831728	0.895	Unchanged	Serine carboxypeptidase	GO:0004185; GO:0006508	proteolysis [GO:0006508]		serine-type carboxypeptidase activity [GO:0004185]	Q9C7Z9	AT1G33540
A0A2K3PJH6	Trifolium	-0.4	0.17181	0.933	Unchanged	Methyltransferase (EC 2.1.1.-)	GO:0008757; GO:0016126; GO:0032259	methylation [GO:0032259]; sterol biosynthetic process [GO:0016126]		S-adenosylmethionine-dependent methyltransferase activity [GO:0008757]	Q9LM02	AT5G13710
A0A2K3PK00	Trifolium	-1.15	0.218855	0.942	Unchanged	Pathogenesis-related protein pr10	GO:0004864; GO:0006952; GO:0009607; GO:0009738; GO:0010427; GO:0038023	abscisic acid-activated signaling pathway [GO:0009738]; defense response [GO:0006952]; response to biotic stimulus [GO:0009607]		abscisic acid binding [GO:0010427]; protein phosphatase inhibitor activity [GO:0004864]; signaling receptor activity [GO:0038023]	#N/A	#N/A
A0A2K3PKN5	Trifolium	0.262	0.222459	0.943	Unchanged	40S ribosomal protein s20-2-like	GO:0003735; GO:0006412; GO:0015935	translation [GO:0006412]	small ribosomal subunit [GO:0015935]	structural constituent of ribosome [GO:0003735]	Q9STY6	AT3G47370
A0A2K3PL18	Trifolium	0.184	0.455592	0.963	Unchanged	RNA recognition motif	GO:0003723			RNA binding [GO:0003723]	O80678	AT2G41060
A0A2K3PLW4	Trifolium	1.31	0.00174961	0.437	Up-regulated	Protein bem46-like	GO:0006508; GO:0008236; GO:0016020	proteolysis [GO:0006508]	membrane [GO:0016020]	serine-type peptidase activity [GO:0008236]	Q8RXP6	AT5G20520
A0A2K3PLZ5	Trifolium	2.17	0.00823222	0.645	Up-regulated	Cytochrome c oxidase subunit 2	GO:0003677; GO:0004129; GO:0005507; GO:0005743; GO:0006355; GO:0070469	regulation of DNA-templated transcription [GO:0006355]	mitochondrial inner membrane [GO:0005743]; respirasome [GO:0070469]	copper ion binding [GO:0005507]; cytochrome-c oxidase activity [GO:0004129]; DNA binding [GO:0003677]	P93285	#N/A
A0A2K3PNC7	Trifolium	0.271	0.41922	0.961	Unchanged	Ferredoxin--nitrite reductase, chloroplastic (EC 1.7.7.1)	GO:0016491; GO:0020037; GO:0042128; GO:0051536	nitrate assimilation [GO:0042128]		heme binding [GO:0020037]; iron-sulfur cluster binding [GO:0051536]; oxidoreductase activity [GO:0016491]	Q39161	AT2G15620
A0A2K3PNI0	Trifolium	0.409	0.34733	0.956	Unchanged	BEL1-like homeodomain protein 1-like	GO:0003677; GO:0005634; GO:0006355	regulation of DNA-templated transcription [GO:0006355]	nucleus [GO:0005634]	DNA binding [GO:0003677]	Q9SJ56	AT2G35940
A0A2K3PNL8	Trifolium	-0.862	0.105308	0.909	Unchanged	Heat shock protein	GO:0005524; GO:0140662			ATP binding [GO:0005524]; ATP-dependent protein folding chaperone [GO:0140662]	P22953	AT5G02500
A0A2K3PNM2	Trifolium	0.9	0.0271446	0.791	Up-regulated	Non-specific phospholipase C4	GO:0016788			hydrolase activity, acting on ester bonds [GO:0016788]	Q8L7Y9	AT1G07230
A0A2K3PNX4	Trifolium	0.967	0.0352188	0.822	Up-regulated	Protein HGH1 homolog					Q9M9T2	#N/A
A0A2K3PPJ0	Trifolium	-0.898	0.0522642	0.86	Unchanged	Wall-associated receptor kinase 2-like protein	GO:0004674; GO:0005509; GO:0005524; GO:0007166; GO:0016020; GO:0016310	cell surface receptor signaling pathway [GO:0007166]; phosphorylation [GO:0016310]	membrane [GO:0016020]	ATP binding [GO:0005524]; calcium ion binding [GO:0005509]; protein serine/threonine kinase activity [GO:0004674]	Q9LMN7	AT1G21230
A0A2K3PPV7	Trifolium	-0.259	0.248097	0.946	Unchanged	Inositol-pentakisphosphate 2-kinase (EC 2.7.1.158)	GO:0005524; GO:0016310; GO:0035299	phosphorylation [GO:0016310]		ATP binding [GO:0005524]; inositol pentakisphosphate 2-kinase activity [GO:0035299]	Q1PFT7	AT1G22100
A0A2K3PQJ3	Trifolium	-0.235	0.302898	0.953	Unchanged	Malic enzyme	GO:0004470; GO:0006108; GO:0016616; GO:0046872; GO:0051287	malate metabolic process [GO:0006108]		malic enzyme activity [GO:0004470]; metal ion binding [GO:0046872]; NAD binding [GO:0051287]; oxidoreductase activity, acting on the CH-OH group of donors, NAD or NADP as acceptor [GO:0016616]	Q9CA83	AT1G79750
A0A2K3PRF1	Trifolium	1.12	0.0101245	0.665	Up-regulated	Pentatricopeptide repeat-containing protein at3g50420-like protein					Q9SCT2	AT3G50420
A0A2K3PRV8	Trifolium	-0.877	0.0633349	0.876	Unchanged	Beta-glucosidase 12-like protein	GO:0004553; GO:0005975	carbohydrate metabolic process [GO:0005975]		hydrolase activity, hydrolyzing O-glycosyl compounds [GO:0004553]	A0A1P8B0I8	#N/A
A0A2K3JJW0	Trifolium	-2.23	0.00156654	0.419	Down-regulated	Exocyst subunit Exo70 family protein	GO:0000145; GO:0005546; GO:0006887; GO:0015031	exocytosis [GO:0006887]; protein transport [GO:0015031]	exocyst [GO:0000145]	phosphatidylinositol-4,5-bisphosphate binding [GO:0005546]	Q9FGH9	AT5G58430
A0A2K3JK09	Trifolium	-0.258	0.555103	0.967	Unchanged	Uncharacterized protein					A0A1P8B864	#N/A
A0A2K3JK24	Trifolium	0.295	0.514294	0.966	Unchanged	Pathogen-inducible alpha-dioxygenase	GO:0004601; GO:0006633; GO:0006979; GO:0020037; GO:0051213	fatty acid biosynthetic process [GO:0006633]; response to oxidative stress [GO:0006979]		dioxygenase activity [GO:0051213]; heme binding [GO:0020037]; peroxidase activity [GO:0004601]	Q9SGH6	AT3G01420
A0A2K3JK34	Trifolium	-0.844	0.263018	0.948	Unchanged	(+)-neomenthol dehydrogenase-like protein	GO:0016491			oxidoreductase activity [GO:0016491]	A8MQD9	AT1G01800
A0A2K3JK49	Trifolium	0.176	0.652881	0.971	Unchanged	Dihydroxy-acid dehydratase-like protein	GO:0016836			hydro-lyase activity [GO:0016836]	Q9LIR4	AT3G23940
A0A2K3JK50	Trifolium	-0.0451	0.934581	0.977	Unchanged	Pentatricopeptide repeat-containing protein	GO:0008270			zinc ion binding [GO:0008270]	Q9ZQE5	AT2G15690
A0A2K3JK71	Trifolium	-0.309	0.588348	0.969	Unchanged	Uncharacterized protein					#N/A	#N/A
A0A2K3JK90	Trifolium	1.31	0.0227858	0.768	Up-regulated	60S ribosomal protein l5-like	GO:0003735; GO:0005840; GO:0006412; GO:0008097; GO:1990904	translation [GO:0006412]	ribonucleoprotein complex [GO:1990904]; ribosome [GO:0005840]	5S rRNA binding [GO:0008097]; structural constituent of ribosome [GO:0003735]	F4J912	#N/A
A0A2K3JKA7	Trifolium	-0.322	0.244489	0.946	Unchanged	lactoylglutathione lyase (EC 4.4.1.5) (Glyoxalase I)	GO:0004462; GO:0046872			lactoylglutathione lyase activity [GO:0004462]; metal ion binding [GO:0046872]	O65398	AT1G11840
A0A2K3JKC0	Trifolium	-0.106	0.803942	0.974	Unchanged	factor independent urate hydroxylase (EC 1.7.3.3) (Urate oxidase)	GO:0004846; GO:0005777; GO:0006144; GO:0019628	purine nucleobase metabolic process [GO:0006144]; urate catabolic process [GO:0019628]	peroxisome [GO:0005777]	urate oxidase activity [GO:0004846]	O04420	AT2G26230
A0A2K3JKH8	Trifolium	0.011	0.957661	0.977	Unchanged	Homoserine dehydrogenase (EC 1.1.1.3)	GO:0004072; GO:0004412; GO:0009086; GO:0009088; GO:0009097	isoleucine biosynthetic process [GO:0009097]; methionine biosynthetic process [GO:0009086]; threonine biosynthetic process [GO:0009088]		aspartate kinase activity [GO:0004072]; homoserine dehydrogenase activity [GO:0004412]	Q84JZ4	#N/A
A0A2K3JKK0	Trifolium	-0.818	0.0410648	0.838	Down-regulated	Elongation factor 2-like protein	GO:0003746			translation elongation factor activity [GO:0003746]	Q9ASR1	AT1G56070
A0A2K3JKL2	Trifolium	0.0889	0.903246	0.976	Unchanged	Glycoside hydrolase family 18 protein	GO:0005975; GO:0008061; GO:0016787	carbohydrate metabolic process [GO:0005975]		chitin binding [GO:0008061]; hydrolase activity [GO:0016787]	O81862	AT4G19810
A0A2K3JKM4	Trifolium	-0.531	0.131263	0.921	Unchanged	RNA-dependent RNA polymerase (EC 2.7.7.48)	GO:0003723; GO:0003968; GO:0031047	regulatory ncRNA-mediated gene silencing [GO:0031047]		RNA binding [GO:0003723]; RNA-dependent RNA polymerase activity [GO:0003968]	A0A1P8B192	#N/A
A0A2K3JKN9	Trifolium	-0.426	0.546545	0.967	Unchanged	IAA-amino acid hydrolase ILR1-like protein	GO:0016787			hydrolase activity [GO:0016787]	O04373	AT1G51760
A0A2K3JKP5	Trifolium	-0.563	0.315314	0.954	Unchanged	Serine/threonine-protein kinase	GO:0004672; GO:0005524; GO:0016310	phosphorylation [GO:0016310]		ATP binding [GO:0005524]; protein kinase activity [GO:0004672]	Q8GXZ3	AT5G01020
A0A2K3JKU1	Trifolium	-0.388	0.33282	0.955	Unchanged	Putative carboxylesterase 2-like protein	GO:0016787			hydrolase activity [GO:0016787]	Q9SX78	AT1G47480
A0A2K3JKU3	Trifolium	-0.555	0.144052	0.925	Unchanged	Cysteine synthase	GO:0016020		membrane [GO:0016020]		P47999	AT2G43750
A0A2K3JKV3	Trifolium	-1.54	0.212434	0.941	Unchanged	Long chain acyl-CoA synthetase peroxisomal-like					Q8LPS1	AT3G05970
A0A2K3JKW8	Trifolium	0.851	0.082932	0.895	Unchanged	Asparagine synthetase	GO:0004066; GO:0006529	asparagine biosynthetic process [GO:0006529]		asparagine synthase (glutamine-hydrolyzing) activity [GO:0004066]	A0A1I9LPY0	#N/A
A0A2K3JKX3	Trifolium	1.21	0.169178	0.932	Unchanged	Xyloglucan endotransglucosylase/hydrolase	GO:0004553; GO:0005975	carbohydrate metabolic process [GO:0005975]		hydrolase activity, hydrolyzing O-glycosyl compounds [GO:0004553]	Q38907	AT5G57550
A0A2K3JKY1	Trifolium	0.00585	0.989775	0.978	Unchanged	DNA (Cytosine-5)-methyltransferase	GO:0005634; GO:0008168; GO:0032259	methylation [GO:0032259]	nucleus [GO:0005634]	methyltransferase activity [GO:0008168]	P34881	AT5G49160
A0A2K3JKY5	Trifolium	-0.733	0.215165	0.942	Unchanged	Lysine/histidine transporter 8-like protein	GO:0016020		membrane [GO:0016020]		Q9SX98	AT1G47670
A0A2K3JKZ6	Trifolium	-0.448	0.555231	0.967	Unchanged	Alpha-D-xylosidase	GO:0003824; GO:0005975; GO:0030246	carbohydrate metabolic process [GO:0005975]		carbohydrate binding [GO:0030246]; catalytic activity [GO:0003824]	Q9S7Y7	AT1G68560
A0A2K3JL02	Trifolium	0.313	0.469415	0.964	Unchanged	40S ribosomal protein sa-like	GO:0003735; GO:0005737; GO:0006412; GO:0015935	translation [GO:0006412]	cytoplasm [GO:0005737]; small ribosomal subunit [GO:0015935]	structural constituent of ribosome [GO:0003735]	Q8H173	AT3G04770
A0A2K3JL03	Trifolium	-1.53	0.139306	0.924	Unchanged	Deoxyuridine 5'-triphosphate nucleotidohydrolase (dUTPase) (EC 3.6.1.23) (dUTP pyrophosphatase)	GO:0000287; GO:0004170; GO:0006226; GO:0046081	dUMP biosynthetic process [GO:0006226]; dUTP catabolic process [GO:0046081]		dUTP diphosphatase activity [GO:0004170]; magnesium ion binding [GO:0000287]	Q9STG6	AT3G46940
A0A2K3JL24	Trifolium	-0.251	0.669332	0.971	Unchanged	DNA (Cytosine-5)-methyltransferase	GO:0008168; GO:0032259	methylation [GO:0032259]		methyltransferase activity [GO:0008168]	A0A1P8B8N3	#N/A
A0A2K3JL72	Trifolium	-0.744	0.0192659	0.744	Down-regulated	Transport protein SEC31A-like	GO:0005737; GO:0006888	endoplasmic reticulum to Golgi vesicle-mediated transport [GO:0006888]	cytoplasm [GO:0005737]		Q8L611	AT3G63460
A0A2K3JL93	Trifolium	-0.15	0.78014	0.974	Unchanged	Beta-adaptin C-like protein	GO:0006886; GO:0016192; GO:0030117	intracellular protein transport [GO:0006886]; vesicle-mediated transport [GO:0016192]	membrane coat [GO:0030117]		A0A1P8B3B6	#N/A
A0A2K3JLB5	Trifolium	-1.01	0.169914	0.932	Unchanged	Phospholipase A1 (EC 3.1.1.-)	GO:0008970; GO:0016042	lipid catabolic process [GO:0016042]		phospholipase A1 activity [GO:0008970]	Q9SJI7	AT2G42690
A0A2K3JLD4	Trifolium	0.707	0.0172124	0.727	Up-regulated	Histone H2B	GO:0000786; GO:0003677; GO:0005634; GO:0030527; GO:0046982		nucleosome [GO:0000786]; nucleus [GO:0005634]	DNA binding [GO:0003677]; protein heterodimerization activity [GO:0046982]; structural constituent of chromatin [GO:0030527]	O23629	AT3G45980
A0A2K3JLD7	Trifolium	1.04	0.00237943	0.482	Up-regulated	Bifunctional aspartate aminotransferase and glutamate/aspartate-prephenate aminotransferase-like protein	GO:0008483			transaminase activity [GO:0008483]	Q9C969	AT1G80360
A0A2K3JLF2	Trifolium	-0.327	0.45995	0.963	Unchanged	NADP-dependent alkenal double bond reductase p1-like protein	GO:0016628			oxidoreductase activity, acting on the CH-CH group of donors, NAD or NADP as acceptor [GO:0016628]	Q9M9M7	AT3G03080
A0A2K3JLK3	Trifolium	-0.555	0.0274965	0.793	Unchanged	60S ribosomal protein l24-like	GO:0005840		ribosome [GO:0005840]		Q42347	AT2G36620
A0A2K3JLK4	Trifolium	-0.568	0.151374	0.928	Unchanged	Protein grpE-like	GO:0000774; GO:0006457; GO:0042803; GO:0051087	protein folding [GO:0006457]		adenyl-nucleotide exchange factor activity [GO:0000774]; protein homodimerization activity [GO:0042803]; protein-folding chaperone binding [GO:0051087]	Q8LB47	AT4G26780
A0A2K3JLM6	Trifolium	1.43	0.104887	0.909	Unchanged	Kunitz-type trypsin inhibitor-like 2 protein	GO:0004866; GO:0005576		extracellular region [GO:0005576]	endopeptidase inhibitor activity [GO:0004866]	Q9LMU2	AT1G17860
A0A2K3JLM9	Trifolium	0.255	0.734602	0.973	Unchanged	Calcium-dependent protein kinase 10-like protein	GO:0004674; GO:0005524; GO:0016020; GO:0016310	phosphorylation [GO:0016310]	membrane [GO:0016020]	ATP binding [GO:0005524]; protein serine/threonine kinase activity [GO:0004674]	Q9SSF8	AT1G74740
A0A2K3JLT5	Trifolium	-0.88	0.0251297	0.781	Down-regulated	40S ribosomal protein s15-like	GO:0003735; GO:0005840; GO:0006412; GO:1990904	translation [GO:0006412]	ribonucleoprotein complex [GO:1990904]; ribosome [GO:0005840]	structural constituent of ribosome [GO:0003735]	Q9FY65	AT5G09500
A0A2K3JLU6	Trifolium	-1.05	0.010471	0.669	Down-regulated	Pleiotropic drug resistance protein 1-like	GO:0005524; GO:0016020; GO:0016887; GO:0140359		membrane [GO:0016020]	ABC-type transporter activity [GO:0140359]; ATP binding [GO:0005524]; ATP hydrolysis activity [GO:0016887]	A0A1P8AW07	#N/A
A0A2K3JLV1	Trifolium	0.274	0.598436	0.969	Unchanged	WRKY transcription factor	GO:0003700; GO:0043565			DNA-binding transcription factor activity [GO:0003700]; sequence-specific DNA binding [GO:0043565]	Q9FG77	AT5G56270
A0A2K3JLW1	Trifolium	-0.0323	0.893401	0.976	Unchanged	Large ribosomal subunit protein eL22 (60S ribosomal protein L22)	GO:0003735; GO:0005840; GO:0006412	translation [GO:0006412]	ribosome [GO:0005840]	structural constituent of ribosome [GO:0003735]	Q9M9W1	AT3G05560
A0A2K3JM04	Trifolium	0.278	0.640839	0.97	Unchanged	ATPase asna1	GO:0005524; GO:0016887			ATP binding [GO:0005524]; ATP hydrolysis activity [GO:0016887]	B3H5S5	#N/A
A0A2K3JM09	Trifolium	0.394	0.192801	0.938	Unchanged	SUN domain-containing protein 1-like	GO:0005635; GO:0016020; GO:0043621; GO:0051179	localization [GO:0051179]	membrane [GO:0016020]; nuclear envelope [GO:0005635]	protein self-association [GO:0043621]	Q9FF75	AT5G04990
A0A2K3JM25	Trifolium	-0.329	0.436885	0.962	Unchanged	NADPH-dependent diflavin oxidoreductase ATR3-like protein	GO:0005634; GO:0005737; GO:0009793; GO:0010181; GO:0016651	embryo development ending in seed dormancy [GO:0009793]	cytoplasm [GO:0005737]; nucleus [GO:0005634]	FMN binding [GO:0010181]; oxidoreductase activity, acting on NAD(P)H [GO:0016651]	Q6NPS8	AT3G02280
A0A2K3JM26	Trifolium	0.0112	0.954822	0.977	Unchanged	Casein kinase i isoform delta-like protein	GO:0004674; GO:0016310	phosphorylation [GO:0016310]		protein serine/threonine kinase activity [GO:0004674]	Q9CAI5	AT1G72710
A0A2K3JM57	Trifolium	-0.0406	0.874778	0.976	Unchanged	Glutamyl-tRNA(Gln) amidotransferase subunit A chloroplastic/mitochondrial-like	GO:0016740			transferase activity [GO:0016740]	Q9LI77	AT3G25660
A0A2K3JM95	Trifolium	-0.0871	0.894648	0.976	Unchanged	Magnesium transporter MRS2-1-like protein	GO:0015095			magnesium ion transmembrane transporter activity [GO:0015095]	Q9S9N4	AT1G16010
A0A2K3JMC9	Trifolium	-0.179	0.789149	0.974	Unchanged	Protein SRG1-like					F4I629	AT1G17010
A0A2K3JMD6	Trifolium	0.165	0.389436	0.959	Unchanged	Seryl-tRNA ligase	GO:0004828; GO:0005524; GO:0006434	seryl-tRNA aminoacylation [GO:0006434]		ATP binding [GO:0005524]; serine-tRNA ligase activity [GO:0004828]	Q39230	AT5G27470
A0A2K3JME0	Trifolium	0.321	0.4579	0.963	Unchanged	N-alpha-acetyltransferase 11-like protein	GO:0003729; GO:0004596; GO:0005829; GO:0009414; GO:0009793; GO:0031415	embryo development ending in seed dormancy [GO:0009793]; response to water deprivation [GO:0009414]	cytosol [GO:0005829]; NatA complex [GO:0031415]	mRNA binding [GO:0003729]; peptide alpha-N-acetyltransferase activity [GO:0004596]	Q9FKI4	AT5G13780
A0A2K3JMG1	Trifolium	0.16	0.737337	0.973	Unchanged	Urease accessory protein UreH-like	GO:0016020		membrane [GO:0016020]		Q9SLD9	AT2G16800
A0A2K3JMG8	Trifolium	1.33	0.0406808	0.837	Up-regulated	40S ribosomal protein s2-4-like	GO:0003723; GO:0003735; GO:0006412; GO:0015935	translation [GO:0006412]	small ribosomal subunit [GO:0015935]	RNA binding [GO:0003723]; structural constituent of ribosome [GO:0003735]	Q9SCM3	AT3G57490
A0A2K3JMH9	Trifolium	-0.773	0.00514227	0.587	Down-regulated	60S ribosomal protein l9-like	GO:0003735; GO:0005840; GO:0006412; GO:0019843; GO:1990904	translation [GO:0006412]	ribonucleoprotein complex [GO:1990904]; ribosome [GO:0005840]	rRNA binding [GO:0019843]; structural constituent of ribosome [GO:0003735]	P49209	AT1G33140
A0A2K3JMI3	Trifolium	-0.046	0.947301	0.977	Unchanged	Codeine O-demethylase-like	GO:0008168; GO:0032259; GO:0046872	methylation [GO:0032259]		metal ion binding [GO:0046872]; methyltransferase activity [GO:0008168]	A0A1P8ARH4	AT1G49390
A0A2K3JMJ3	Trifolium	-0.109	0.838047	0.975	Unchanged	WRKY transcription factor 6-like protein	GO:0003700; GO:0005634; GO:0043565		nucleus [GO:0005634]	DNA-binding transcription factor activity [GO:0003700]; sequence-specific DNA binding [GO:0043565]	Q9C519	AT1G62300
A0A2K3JMK3	Trifolium	0.175	0.470424	0.964	Unchanged	Uncharacterized protein					#N/A	#N/A
A0A2K3JMK8	Trifolium	-0.0682	0.852323	0.975	Unchanged	Calcium and calmodulin-dependent serine threonine-protein kinase-like protein	GO:0016301; GO:0016310	phosphorylation [GO:0016310]		kinase activity [GO:0016301]	Q9ZSA2	AT4G04720
A0A2K3JML1	Trifolium	0.166	0.881039	0.976	Unchanged	Putative sulfate transporter					#N/A	#N/A
A0A2K3JMM5	Trifolium	-0.332	0.547026	0.967	Unchanged	(+)-neomenthol dehydrogenase	GO:0016491			oxidoreductase activity [GO:0016491]	A8MQD9	AT1G01800
A0A2K3JMR0	Trifolium	-0.427	0.542991	0.967	Unchanged	26S proteasome non-ATPase regulatory subunit 4-like protein	GO:0000502		proteasome complex [GO:0000502]		P55034	AT4G38630
A0A2K3JMX3	Trifolium	0.0247	0.960025	0.977	Unchanged	Cytochrome p450	GO:0004497; GO:0005506; GO:0016020; GO:0016705; GO:0020037		membrane [GO:0016020]	heme binding [GO:0020037]; iron ion binding [GO:0005506]; monooxygenase activity [GO:0004497]; oxidoreductase activity, acting on paired donors, with incorporation or reduction of molecular oxygen [GO:0016705]	O49396	AT4G31950
A0A2K3JMX7	Trifolium	0.148	0.74534	0.973	Unchanged	Chalcone-flavonone isomerase family protein	GO:0009813; GO:0045430	flavonoid biosynthetic process [GO:0009813]		chalcone isomerase activity [GO:0045430]	Q9FKW3	AT5G66220
A0A2K3JMZ4	Trifolium	0.0287	0.958351	0.977	Unchanged	RNA helicase (EC 3.6.4.13)	GO:0003724			RNA helicase activity [GO:0003724]	Q38953	AT3G26560
A0A2K3JN07	Trifolium	-0.845	0.0884799	0.899	Unchanged	Cathepsin b-like protein	GO:0006508; GO:0008234	proteolysis [GO:0006508]		cysteine-type peptidase activity [GO:0008234]	Q93VC9	AT1G02305
A0A2K3JN09	Trifolium	0.79	0.0319359	0.811	Up-regulated	4-coumarate--CoA ligase (EC 6.2.1.12)	GO:0016020; GO:0016874		membrane [GO:0016020]	ligase activity [GO:0016874]	A8MS69	#N/A
A0A2K3JN46	Trifolium	0.104	0.834586	0.975	Unchanged	1-aminocyclopropane-1-carboxylate oxidase 4-like protein					A0A1P8AM08	#N/A
A0A2K3JN53	Trifolium	0.448	0.573219	0.968	Unchanged	Glyoxylate reductase	GO:0051287			NAD binding [GO:0051287]	Q9CA90	AT1G79870
A0A2K3JN63	Trifolium	0.457	0.509582	0.966	Unchanged	Putative carboxylesterase 2-like protein	GO:0016787			hydrolase activity [GO:0016787]	Q9SX78	AT1G47480
A0A2K3JN70	Trifolium	0.00813	0.984068	0.978	Unchanged	pyridoxal 5'-phosphate synthase (glutamine hydrolyzing) (EC 4.3.3.6)	GO:0005829; GO:0005886; GO:0006520; GO:0006982; GO:0010224; GO:0010335; GO:0012505; GO:0015994; GO:0042538; GO:0042803; GO:0042823; GO:0046982	amino acid metabolic process [GO:0006520]; chlorophyll metabolic process [GO:0015994]; hyperosmotic salinity response [GO:0042538]; pyridoxal phosphate biosynthetic process [GO:0042823]; response to lipid hydroperoxide [GO:0006982]; response to non-ionic osmotic stress [GO:0010335]; response to UV-B [GO:0010224]	cytosol [GO:0005829]; endomembrane system [GO:0012505]; plasma membrane [GO:0005886]	protein heterodimerization activity [GO:0046982]; protein homodimerization activity [GO:0042803]	Q8L940	AT5G01410
A0A2K3JN74	Trifolium	-0.324	0.718758	0.972	Unchanged	Ribosomal RNA small subunit methyltransferase NEP1-like protein	GO:0019843; GO:0070037; GO:0070475	rRNA base methylation [GO:0070475]		rRNA (pseudouridine) methyltransferase activity [GO:0070037]; rRNA binding [GO:0019843]	Q9M1J8	AT3G57000
A0A2K3JN87	Trifolium	1.28	0.0957942	0.904	Unchanged	GDSL esterase/lipase CPRD49	GO:0016788			hydrolase activity, acting on ester bonds [GO:0016788]	Q9SRM5	AT3G11210
A0A2K3JNB4	Trifolium	-1.76	0.0215391	0.76	Down-regulated	Plastid-lipid-associated protein chloroplastic-like					O81439	AT4G04020
A0A2K3JNB9	Trifolium	-0.0877	0.659068	0.971	Unchanged	Metal-dependent protein hydrolase	GO:0016787			hydrolase activity [GO:0016787]	F4K000	AT5G41970
A0A2K3JNC7	Trifolium	-1.04	0.00235576	0.48	Down-regulated	Glycerol-3-phosphate dehydrogenase (EC 1.1.5.3)	GO:0004368; GO:0006072; GO:0009331	glycerol-3-phosphate metabolic process [GO:0006072]	glycerol-3-phosphate dehydrogenase complex [GO:0009331]	glycerol-3-phosphate dehydrogenase (quinone) activity [GO:0004368]	Q9SS48	AT3G10370
A0A2K3JND6	Trifolium	0.388	0.412608	0.961	Unchanged	Dicarboxylate transporter chloroplastic-like	GO:0009706; GO:0015140		chloroplast inner membrane [GO:0009706]	malate transmembrane transporter activity [GO:0015140]	Q9FMF7	AT5G64290
A0A2K3JNG9	Trifolium	-0.728	0.114371	0.914	Unchanged	3-isopropylmalate dehydrogenase chloroplastic-like	GO:0003862; GO:0009098; GO:0046872	leucine biosynthetic process [GO:0009098]		3-isopropylmalate dehydrogenase activity [GO:0003862]; metal ion binding [GO:0046872]	P93832	AT1G80560
A0A2K3JNI2	Trifolium	-2.17	0.080247	0.893	Unchanged	Aspartic proteinase cdr1-like protein					Q6XBF8	AT5G33340
A0A2K3JNI5	Trifolium	0.107	0.706728	0.972	Unchanged	Vacuolar sorting-associated protein 16	GO:0006886; GO:0009705; GO:0030897; GO:0033263; GO:0045992; GO:0051469	intracellular protein transport [GO:0006886]; negative regulation of embryonic development [GO:0045992]; vesicle fusion with vacuole [GO:0051469]	CORVET complex [GO:0033263]; HOPS complex [GO:0030897]; plant-type vacuole membrane [GO:0009705]		Q93VQ0	AT2G38020
A0A2K3JNM5	Trifolium	-0.811	0.181801	0.935	Unchanged	RNA recognition motif-containing protein	GO:0030036; GO:0051015	actin cytoskeleton organization [GO:0030036]		actin filament binding [GO:0051015]	F4J5A7	#N/A
A0A2K3JNP7	Trifolium	-0.425	0.259092	0.948	Unchanged	Peptidyl-prolyl cis-trans isomerase e-like protein	GO:0003723; GO:0016853			isomerase activity [GO:0016853]; RNA binding [GO:0003723]	Q0WRA3	AT1G13690
A0A2K3JNV2	Trifolium	-0.631	0.0148165	0.708	Down-regulated	Phosphoacetylglucosamine mutase-like protein	GO:0005975; GO:0016868	carbohydrate metabolic process [GO:0005975]		intramolecular phosphotransferase activity [GO:0016868]	P57750	AT5G18070
A0A2K3JNX1	Trifolium	0.0496	0.896203	0.976	Unchanged	Zinc-metallopeptidase peroxisomal-like	GO:0004222; GO:0006508; GO:0046872	proteolysis [GO:0006508]		metal ion binding [GO:0046872]; metalloendopeptidase activity [GO:0004222]	F4J3D9	AT3G57470
A0A2K3JNX5	Trifolium	-0.362	0.6575	0.971	Unchanged	RING-type E3 ubiquitin transferase (EC 2.3.2.27)	GO:0004672; GO:0005524			ATP binding [GO:0005524]; protein kinase activity [GO:0004672]	A0A1P8BD07	AT5G26150
A0A2K3JNY0	Trifolium	0.259	0.448036	0.963	Unchanged	DNA (Cytosine-5)-methyltransferase	GO:0005634; GO:0008168; GO:0032259	methylation [GO:0032259]	nucleus [GO:0005634]	methyltransferase activity [GO:0008168]	P34881	AT5G49160
A0A2K3JNY6	Trifolium	-0.884	0.372835	0.958	Unchanged	Calcium-transporting ATPase plasma membrane-type-like protein	GO:0005516; GO:0016020		membrane [GO:0016020]	calmodulin binding [GO:0005516]	Q9LIK7	AT3G22910
A0A2K3JP08	Trifolium	-1.15	0.0440286	0.845	Down-regulated	Apyrase 2-like protein	GO:0016020; GO:0016787		membrane [GO:0016020]	hydrolase activity [GO:0016787]	Q9SPM5	AT5G18280
A0A2K3JP18	Trifolium	-0.646	0.0554803	0.865	Unchanged	Threonine-tRNA ligase mitochondrial-like	GO:0000166; GO:0016874			ligase activity [GO:0016874]; nucleotide binding [GO:0000166]	O04630	AT5G26830
A0A2K3JP19	Trifolium	-1.19	0.111213	0.912	Unchanged	Metallo-beta-lactamase superfamily protein					Q682P6	AT1G25375
A0A2K3JP85	Trifolium	-1.17	0.0094483	0.659	Down-regulated	Peroxisomal acyl-CoA oxidase	GO:0003997; GO:0005777; GO:0006631; GO:0071949	fatty acid metabolic process [GO:0006631]	peroxisome [GO:0005777]	acyl-CoA oxidase activity [GO:0003997]; FAD binding [GO:0071949]	P0CZ23	AT1G06290
A0A2K3JP86	Trifolium	0.972	0.0169917	0.725	Up-regulated	Casein kinase ii subunit alpha chloroplastic-like	GO:0004674; GO:0005524; GO:0016310	phosphorylation [GO:0016310]		ATP binding [GO:0005524]; protein serine/threonine kinase activity [GO:0004674]	O64816	AT2G23070
A0A2K3JPA7	Trifolium	-0.879	0.169325	0.932	Unchanged	Non-specific phospholipase C4	GO:0016788			hydrolase activity, acting on ester bonds [GO:0016788]	Q9SRQ7	AT3G03530
A0A2K3JPB0	Trifolium	-0.582	0.116318	0.915	Unchanged	Heat shock cognate 70 kDa protein 2-like	GO:0005524; GO:0140662			ATP binding [GO:0005524]; ATP-dependent protein folding chaperone [GO:0140662]	O65719	AT3G09440
A0A2K3JPB6	Trifolium	0.0247	0.953942	0.977	Unchanged	acid phosphatase (EC 3.1.3.2)	GO:0003993			acid phosphatase activity [GO:0003993]	Q9SIV9	AT2G16430
A0A2K3JPD7	Trifolium	-0.733	0.0880978	0.899	Unchanged	Lipoxygenase	GO:0016702; GO:0046872			metal ion binding [GO:0046872]; oxidoreductase activity, acting on single donors with incorporation of molecular oxygen, incorporation of two atoms of oxygen [GO:0016702]	Q9FNX8	AT1G72520
A0A2K3JPE5	Trifolium	1.21	0.065193	0.878	Unchanged	Germin-like protein	GO:0030145; GO:0048046		apoplast [GO:0048046]	manganese ion binding [GO:0030145]	P92997	AT5G39100
A0A2K3JPF7	Trifolium	-0.147	0.68121	0.971	Unchanged	Outer envelope pore protein chloroplastic-like	GO:0009707; GO:0022843; GO:0034426; GO:0034765	regulation of monoatomic ion transmembrane transport [GO:0034765]	chloroplast outer membrane [GO:0009707]; etioplast membrane [GO:0034426]	voltage-gated monoatomic cation channel activity [GO:0022843]	Q1H5C9	AT1G45170
A0A2K3JPG3	Trifolium	-1.57	0.00312036	0.516	Down-regulated	Peroxisomal acyl-CoA oxidase 1-like protein	GO:0003997; GO:0005777; GO:0006635; GO:0071949	fatty acid beta-oxidation [GO:0006635]	peroxisome [GO:0005777]	acyl-CoA oxidase activity [GO:0003997]; FAD binding [GO:0071949]	F4JMK8	#N/A
A0A2K3JPG8	Trifolium	0.862	0.0962028	0.904	Unchanged	Uncharacterized protein					F4I181	#N/A
A0A2K3JPI6	Trifolium	0.493	0.173811	0.933	Unchanged	Glutathione S-transferase (EC 2.5.1.18)	GO:0004364; GO:0005829		cytosol [GO:0005829]	glutathione transferase activity [GO:0004364]	Q8GYM1	AT1G78340
A0A2K3JPJ3	Trifolium	-0.325	0.656737	0.971	Unchanged	Eukaryotic translation initiation factor 2d-like protein	GO:0003743			translation initiation factor activity [GO:0003743]	Q0WUR1	AT1G71350
A0A2K3JPJ4	Trifolium	-0.65	0.1985	0.939	Unchanged	Nuclear transport factor 2-like protein	GO:0005635; GO:0005737; GO:0006606; GO:0031267; GO:0051028	mRNA transport [GO:0051028]; protein import into nucleus [GO:0006606]	cytoplasm [GO:0005737]; nuclear envelope [GO:0005635]	small GTPase binding [GO:0031267]	Q9FZK4	AT1G27310
A0A2K3JPM0	Trifolium	0.312	0.463019	0.964	Unchanged	Putative peptide/nitrate transporter	GO:0016020; GO:0022857		membrane [GO:0016020]	transmembrane transporter activity [GO:0022857]	Q9M817	AT1G52190
A0A2K3JPP0	Trifolium	0.572	0.0582911	0.869	Unchanged	Uncharacterized protein					Q9FNP8	AT5G61170
A0A2K3JPR6	Trifolium	-0.335	0.646612	0.97	Unchanged	Pre-mRNA-splicing factor syf1-like protein	GO:0000398; GO:0005634	mRNA splicing, via spliceosome [GO:0000398]	nucleus [GO:0005634]		Q9LKU3	AT5G28740
A0A2K3JPW0	Trifolium	-0.317	0.47387	0.964	Unchanged	ABC transporter C family member 3-like protein	GO:0005524; GO:0016020; GO:0140359		membrane [GO:0016020]	ABC-type transporter activity [GO:0140359]; ATP binding [GO:0005524]	Q9LK64	AT3G13080
A0A2K3JPX8	Trifolium	0.354	0.357732	0.957	Unchanged	L-2-hydroxyglutarate dehydrogenase, mitochondrial (EC 1.1.99.2)	GO:0016614			oxidoreductase activity, acting on CH-OH group of donors [GO:0016614]	A0A2H1ZEL1	AT3G56840
A0A2K3JPZ7	Trifolium	0.397	0.407403	0.961	Unchanged	Isoflavone 2'-hydroxylase-like protein	GO:0004497; GO:0005506; GO:0016020; GO:0016705; GO:0020037		membrane [GO:0016020]	heme binding [GO:0020037]; iron ion binding [GO:0005506]; monooxygenase activity [GO:0004497]; oxidoreductase activity, acting on paired donors, with incorporation or reduction of molecular oxygen [GO:0016705]	Q9SZT7	AT4G37370
A0A2K3JPZ8	Trifolium	1.46	0.224454	0.943	Unchanged	serine O-acetyltransferase (EC 2.3.1.30)	GO:0005737; GO:0006535; GO:0009001	cysteine biosynthetic process from serine [GO:0006535]	cytoplasm [GO:0005737]	serine O-acetyltransferase activity [GO:0009001]	Q39218	AT3G13110
A0A2K3JQ06	Trifolium	-2.26	0.0106219	0.67	Down-regulated	Mannosyl-oligosaccharide 1,2-alpha-mannosidase MNS1-like protein	GO:0004571; GO:0005509; GO:0005975; GO:0012505; GO:0016020	carbohydrate metabolic process [GO:0005975]	endomembrane system [GO:0012505]; membrane [GO:0016020]	calcium ion binding [GO:0005509]; mannosyl-oligosaccharide 1,2-alpha-mannosidase activity [GO:0004571]	Q9C512	AT1G51590
A0A2K3JQ60	Trifolium	0.137	0.579258	0.968	Unchanged	WPP domain-interacting tail-anchored protein					Q8L7E5	AT5G11390
A0A2K3JQ81	Trifolium	-1.96	0.0220141	0.763	Down-regulated	Aspartic proteinase nepenthesin-1-like protein	GO:0004190; GO:0006508	proteolysis [GO:0006508]		aspartic-type endopeptidase activity [GO:0004190]	F4K5B9	AT5G07030
A0A2K3JQB9	Trifolium	-0.515	0.24832	0.947	Unchanged	Cyclin-dependent kinase	GO:0004672; GO:0005524; GO:0016310	phosphorylation [GO:0016310]		ATP binding [GO:0005524]; protein kinase activity [GO:0004672]	Q9LFT8	AT5G10270
A0A2K3JQF6	Trifolium	-0.129	0.586737	0.969	Unchanged	26S proteasome non-ATPase regulatory subunit 2 1a-like protein	GO:0000502		proteasome complex [GO:0000502]		Q9SIV2	AT2G20580
A0A2K3JQG6	Trifolium	-0.218	0.503633	0.965	Unchanged	Eukaryotic translation initiation factor 3 subunit e-like protein	GO:0003743; GO:0005852		eukaryotic translation initiation factor 3 complex [GO:0005852]	translation initiation factor activity [GO:0003743]	Q9C5Z3	AT3G57290
A0A2K3JQH5	Trifolium	0.646	0.274327	0.95	Unchanged	homogentisate 1,2-dioxygenase (EC 1.13.11.5)	GO:0004411; GO:0006559; GO:0006570	L-phenylalanine catabolic process [GO:0006559]; tyrosine metabolic process [GO:0006570]		homogentisate 1,2-dioxygenase activity [GO:0004411]	Q9ZRA2	AT5G54080
A0A2K3JQI6	Trifolium	0.0424	0.906422	0.976	Unchanged	Splicing factor 3A subunit 2-like protein	GO:0005634; GO:0046872		nucleus [GO:0005634]	metal ion binding [GO:0046872]	O80897	AT2G32600
A0A2K3JQI9	Trifolium	0.721	0.0511234	0.858	Unchanged	Alpha-glucosidase 2-like protein					A0A1I9LTS6	AT3G23640
A0A2K3JQJ6	Trifolium	-0.297	0.227846	0.944	Unchanged	Stromal 70 kDa heat shock-related protein chloroplastic-like	GO:0005524; GO:0140662			ATP binding [GO:0005524]; ATP-dependent protein folding chaperone [GO:0140662]	Q9LTX9	AT5G49910
A0A2K3JQR7	Trifolium	-1.03	0.0346398	0.82	Down-regulated	non-specific serine/threonine protein kinase (EC 2.7.11.1)	GO:0004672; GO:0005524; GO:0016310	phosphorylation [GO:0016310]		ATP binding [GO:0005524]; protein kinase activity [GO:0004672]	P43291	AT1G10940
A0A2K3JQZ1	Trifolium	-0.962	0.0581438	0.869	Unchanged	Mitochondrial rho GTPase 1-like protein	GO:0005525; GO:0007264	small GTPase mediated signal transduction [GO:0007264]		GTP binding [GO:0005525]	Q8RXF8	AT5G27540
A0A2K3JRI2	Trifolium	0.268	0.424946	0.962	Unchanged	Fiber protein fb15					Q9SZV4	AT4G30010
A0A2K3JRJ2	Trifolium	-0.925	0.149787	0.927	Unchanged	Malic enzyme	GO:0004470; GO:0016616			malic enzyme activity [GO:0004470]; oxidoreductase activity, acting on the CH-OH group of donors, NAD or NADP as acceptor [GO:0016616]	Q8L7K9	AT4G00570
A0A2K3JRM1	Trifolium	0.268	0.434486	0.962	Unchanged	Aspartate-tRNA ligase cytoplasmic-like	GO:0004815; GO:0005524; GO:0005737; GO:0006422	aspartyl-tRNA aminoacylation [GO:0006422]	cytoplasm [GO:0005737]	aspartate-tRNA ligase activity [GO:0004815]; ATP binding [GO:0005524]	Q9M084	AT4G31180
A0A2K3JRN2	Trifolium	-0.206	0.804507	0.974	Unchanged	dolichyl-diphosphooligosaccharide--protein glycotransferase (EC 2.4.99.18)	GO:0004579; GO:0006486; GO:0016020; GO:0046872	protein glycosylation [GO:0006486]	membrane [GO:0016020]	dolichyl-diphosphooligosaccharide-protein glycotransferase activity [GO:0004579]; metal ion binding [GO:0046872]	Q93ZY3	AT5G19690
A0A2K3JRQ5	Trifolium	-0.433	0.433516	0.962	Unchanged	Alpha-carbonic anhydrase domain-containing protein					O04846	AT3G52720
A0A2K3JRR2	Trifolium	-0.325	0.301877	0.953	Unchanged	Protein RALF-like 34-like	GO:0005576		extracellular region [GO:0005576]		Q9FHA6	AT5G67070
A0A2K3JRU6	Trifolium	-0.671	0.28448	0.951	Unchanged	Aspartyl-tRNA synthetase	GO:0003677; GO:0004815; GO:0005524; GO:0005737; GO:0006422	aspartyl-tRNA aminoacylation [GO:0006422]	cytoplasm [GO:0005737]	aspartate-tRNA ligase activity [GO:0004815]; ATP binding [GO:0005524]; DNA binding [GO:0003677]	Q9M084	AT4G31180
A0A2K3JRZ1	Trifolium	0.13	0.604809	0.969	Unchanged	60S ribosomal protein l18a-like	GO:0003735; GO:0005840; GO:0006412	translation [GO:0006412]	ribosome [GO:0005840]	structural constituent of ribosome [GO:0003735]	P51418	AT2G34480
A0A2K3JRZ5	Trifolium	-0.337	0.413746	0.961	Unchanged	Transferase CAF17 mitochondrial-like	GO:0016740			transferase activity [GO:0016740]	Q8L733	AT4G12130
A0A2K3JS12	Trifolium	0.734	0.277893	0.95	Unchanged	3-hydroxyisobutyryl-CoA hydrolase (HIB-CoA hydrolase) (HIBYL-CoA-H) (EC 3.1.2.4) (3-hydroxyisobutyryl-coenzyme A hydrolase)	GO:0003860; GO:0006574	valine catabolic process [GO:0006574]		3-hydroxyisobutyryl-CoA hydrolase activity [GO:0003860]	Q1PEY5	AT2G30650
A0A2K3JS85	Trifolium	0.11	0.872914	0.976	Unchanged	MLP-like protein	GO:0006952	defense response [GO:0006952]			F4I6Z0	AT1G70870
A0A2K3JSE2	Trifolium	0.025	0.966786	0.977	Unchanged	Clustered mitochondria protein-like	GO:0006996	organelle organization [GO:0006996]			F4J5S1	AT3G52140
A0A2K3JSG1	Trifolium	-1.11	0.0358085	0.824	Down-regulated	Cytochrome p450 89a2-like protein	GO:0004497; GO:0005506; GO:0016020; GO:0016705; GO:0020037		membrane [GO:0016020]	heme binding [GO:0020037]; iron ion binding [GO:0005506]; monooxygenase activity [GO:0004497]; oxidoreductase activity, acting on paired donors, with incorporation or reduction of molecular oxygen [GO:0016705]	Q9XIQ1	AT1G64950
A0A2K3JSI3	Trifolium	0.651	0.274976	0.95	Unchanged	Dihydroflavonol-4-reductase	GO:0016491			oxidoreductase activity [GO:0016491]	A0A1P8AYJ2	#N/A
A0A2K3JSK5	Trifolium	-0.56	0.0988581	0.906	Unchanged	Bpg2-like protein	GO:0005525			GTP binding [GO:0005525]	Q9ZSB8	AT4G10620
A0A2K3JSL1	Trifolium	0.617	0.36137	0.958	Unchanged	Na+/H+ antiporter	GO:0006814; GO:0015297; GO:0016020	sodium ion transport [GO:0006814]	membrane [GO:0016020]	antiporter activity [GO:0015297]	Q9LT68	AT3G19490
A0A2K3JSM6	Trifolium	-0.651	0.129017	0.92	Unchanged	DUF676 domain-containing protein					Q949V0	AT5G51180
A0A2K3JSU3	Trifolium	-1.16	0.0240905	0.776	Down-regulated	Shikimate kinase	GO:0016301; GO:0016310	phosphorylation [GO:0016310]		kinase activity [GO:0016301]	A8MRG1	#N/A
A0A2K3JSY6	Trifolium	-0.605	0.0390835	0.833	Down-regulated	Abscisic acid receptor pyr1-like protein	GO:0004864; GO:0005737; GO:0005886; GO:0009738	abscisic acid-activated signaling pathway [GO:0009738]	cytoplasm [GO:0005737]; plasma membrane [GO:0005886]	protein phosphatase inhibitor activity [GO:0004864]	Q8VZS8	AT5G46790
A0A2K3JSZ4	Trifolium	-0.905	0.177554	0.934	Unchanged	Uncharacterized protein					Q9FGK3	AT5G47540
A0A2K3JSZ5	Trifolium	0.151	0.792076	0.974	Unchanged	ABC transporter C family member 3-like protein	GO:0000166; GO:0016020		membrane [GO:0016020]	nucleotide binding [GO:0000166]	F4JB38	#N/A
A0A2K3JT49	Trifolium	-0.5	0.0830478	0.895	Unchanged	Ubiquitin-activating enzyme E1 1-like protein	GO:0008641			ubiquitin-like modifier activating enzyme activity [GO:0008641]	P92974	AT5G06460
A0A2K3JT95	Trifolium	-0.72	0.110226	0.912	Unchanged	Uncharacterized protein					A0A1P8B864	#N/A
A0A2K3JT96	Trifolium	-3.22	0.00115504	0.366	Down-regulated	Cullin-associated NEDD8-dissociated protein 1-like	GO:0010265	SCF complex assembly [GO:0010265]			Q8L5Y6	AT2G02560
A0A2K3JTA0	Trifolium	-0.206	0.772131	0.974	Unchanged	40S ribosomal protein s9-2-like	GO:0003735; GO:0015935; GO:0019843		small ribosomal subunit [GO:0015935]	rRNA binding [GO:0019843]; structural constituent of ribosome [GO:0003735]	Q9FLF0	AT5G39850
A0A2K3JTA1	Trifolium	0.683	0.123576	0.918	Unchanged	Uncharacterized protein					O64855	AT2G44200
A0A2K3JTD0	Trifolium	0.774	0.118219	0.916	Unchanged	Putative cysteine-rich RLK (Receptor-like kinase) protein	GO:0004672; GO:0005524; GO:0016310	phosphorylation [GO:0016310]		ATP binding [GO:0005524]; protein kinase activity [GO:0004672]	C0LGG7	AT1G53420
A0A2K3JTD3	Trifolium	-1.96	0.00512907	0.586	Down-regulated	3-ketoacyl-CoA thiolase peroxisomal-like	GO:0016020; GO:0016747		membrane [GO:0016020]	acyltransferase activity, transferring groups other than amino-acyl groups [GO:0016747]	Q56WD9	AT2G33150
A0A2K3JTD8	Trifolium	0.338	0.587431	0.969	Unchanged	Serine hydroxymethyltransferase mitochondrial-like	GO:0008168; GO:0032259	methylation [GO:0032259]		methyltransferase activity [GO:0008168]	Q94C74	AT5G26780
A0A2K3JTS9	Trifolium	0.629	0.310957	0.953	Unchanged	Pathogenesis-related protein pr10	GO:0004864; GO:0006952; GO:0009738; GO:0010427; GO:0038023	abscisic acid-activated signaling pathway [GO:0009738]; defense response [GO:0006952]		abscisic acid binding [GO:0010427]; protein phosphatase inhibitor activity [GO:0004864]; signaling receptor activity [GO:0038023]	#N/A	#N/A
A0A2K3JTU8	Trifolium	-1.32	0.0297079	0.802	Down-regulated	Uncharacterized protein					Q8GYJ0	#N/A
A0A2K3JTV6	Trifolium	-0.334	0.479348	0.964	Unchanged	Ribosomal protein L1	GO:0005840		ribosome [GO:0005840]		P59230	AT2G27530
A0A2K3JTW6	Trifolium	-0.136	0.624905	0.97	Unchanged	Pleiotropic drug resistance protein 1-like	GO:0140359			ABC-type transporter activity [GO:0140359]	A0A1P8AW07	#N/A
A0A2K3JTX2	Trifolium	-1.44	0.0792746	0.892	Unchanged	CBS domain-containing protein cbscbspb3-like					Q9SJQ5	AT2G36500
A0A2K3JTX5	Trifolium	-0.383	0.623608	0.97	Unchanged	Cellulose synthase-like protein g1-like	GO:0016020; GO:0016760; GO:0030244	cellulose biosynthetic process [GO:0030244]	membrane [GO:0016020]	cellulose synthase (UDP-forming) activity [GO:0016760]	Q8L778	AT5G09870
A0A2K3JTY8	Trifolium	-0.36	0.100316	0.907	Unchanged	Eukaryotic translation initiation factor 4C	GO:0003723; GO:0003743			RNA binding [GO:0003723]; translation initiation factor activity [GO:0003743]	Q9SJB9	AT2G04520
A0A2K3JU18	Trifolium	0.14	0.692425	0.972	Unchanged	Coatomer subunit alpha-1-like protein					Q9SJT9	AT2G21390
A0A2K3JU68	Trifolium	-0.326	0.261984	0.948	Unchanged	Cytosolic fe-s cluster assembly factor nubp1	GO:0005524; GO:0016226; GO:0051536; GO:0140663	iron-sulfur cluster assembly [GO:0016226]		ATP binding [GO:0005524]; ATP-dependent FeS chaperone activity [GO:0140663]; iron-sulfur cluster binding [GO:0051536]	Q8H1Q2	AT5G50960
A0A2K3JUA7	Trifolium	-1.28	0.0388554	0.832	Down-regulated	K(+) efflux antiporter chloroplastic-like					Q9ZTZ7	AT1G01790
A0A2K3JUE0	Trifolium	-0.192	0.736989	0.973	Unchanged	Glycerol-3-phosphate dehydrogenase					Q9ZNQ5	AT2G01410
A0A2K3JUH1	Trifolium	-0.276	0.478896	0.964	Unchanged	L-idonate 5-dehydrogenase	GO:0016491; GO:0046872			metal ion binding [GO:0046872]; oxidoreductase activity [GO:0016491]	Q9FJ95	AT5G51970
A0A2K3JUJ1	Trifolium	0.186	0.707415	0.972	Unchanged	Flavin-containing monooxygenase (EC 1.-.-.-)	GO:0004499; GO:0050660; GO:0050661			flavin adenine dinucleotide binding [GO:0050660]; N,N-dimethylaniline monooxygenase activity [GO:0004499]; NADP binding [GO:0050661]	A0A1P8APM2	#N/A
A0A2K3JUK7	Trifolium	-1.4	0.0358247	0.824	Down-regulated	Sulfite exporter TauE/SafE family protein	GO:0016020		membrane [GO:0016020]		Q8L7A0	AT2G25737
A0A2K3JUQ4	Trifolium	-0.137	0.657623	0.971	Unchanged	Metaxin-1	GO:0016020		membrane [GO:0016020]		O64471	AT2G19080
A0A2K3JUT3	Trifolium	-0.603	0.462075	0.964	Unchanged	Putative methyltransferase	GO:0005737; GO:0016435; GO:0070476	rRNA (guanine-N7)-methylation [GO:0070476]	cytoplasm [GO:0005737]	rRNA (guanine) methyltransferase activity [GO:0016435]	Q9LVD0	AT5G57280
A0A2K3JUX4	Trifolium	0.141	0.605104	0.969	Unchanged	Elongation factor 2-like protein	GO:0003746; GO:0005525			GTP binding [GO:0005525]; translation elongation factor activity [GO:0003746]	Q9ASR1	AT1G56070
A0A2K3JUZ6	Trifolium	0.488	0.356091	0.957	Unchanged	Mitochondrial rho GTPase 1-like protein					F4J0W4	AT3G63150
A0A2K3JV26	Trifolium	-0.132	0.784914	0.974	Unchanged	Protein LURP-one-related 15-like					Q9LZX1	AT5G01750
A0A2K3JV30	Trifolium	0.712	0.36703	0.958	Unchanged	Type I inositol 145-trisphosphate 5-phosphatase 12-like protein					Q94HW2	#N/A
A0A2K3JV35	Trifolium	0.307	0.626255	0.97	Unchanged	choline-phosphate cytidylyltransferase (EC 2.7.7.15)	GO:0004105			choline-phosphate cytidylyltransferase activity [GO:0004105]	Q9ZV56	AT2G32260
A0A2K3JV67	Trifolium	0.44	0.536293	0.967	Unchanged	glucan endo-1,3-beta-D-glucosidase (EC 3.2.1.39) ((1->3)-beta-glucan endohydrolase) (Beta-1,3-endoglucanase)	GO:0005975; GO:0042973	carbohydrate metabolic process [GO:0005975]		glucan endo-1,3-beta-D-glucosidase activity [GO:0042973]	Q9M2T6	AT3G55430
A0A2K3JV68	Trifolium	0.4	0.172115	0.933	Unchanged	U3 small nucleolar ribonucleoprotein IMP4	GO:0006364; GO:0042134; GO:1990904	rRNA processing [GO:0006364]	ribonucleoprotein complex [GO:1990904]	rRNA primary transcript binding [GO:0042134]	Q9S826	AT1G63780
A0A2K3JV74	Trifolium	-0.578	0.260395	0.948	Unchanged	Beta-(1,2)-xylosyltransferase	GO:0000139; GO:0005797; GO:0006487; GO:0031204; GO:0048367; GO:0050513	post-translational protein targeting to membrane, translocation [GO:0031204]; protein N-linked glycosylation [GO:0006487]; shoot system development [GO:0048367]	Golgi medial cisterna [GO:0005797]; Golgi membrane [GO:0000139]	glycoprotein 2-beta-D-xylosyltransferase activity [GO:0050513]	Q9LDH0	AT5G55500
A0A2K3JV98	Trifolium	0.144	0.519868	0.966	Unchanged	DEAD-box ATP-dependent RNA helicase 2-like protein	GO:0003676; GO:0004386; GO:0005524			ATP binding [GO:0005524]; helicase activity [GO:0004386]; nucleic acid binding [GO:0003676]	Q94A52	AT3G19760
A0A2K3JVB8	Trifolium	0.281	0.501204	0.965	Unchanged	tryptophan synthase (EC 4.2.1.20)	GO:0004834			tryptophan synthase activity [GO:0004834]	P14671	AT5G54810
A0A2K3JVC9	Trifolium	0.257	0.622375	0.97	Unchanged	Protein notum					A0A1P8B651	#N/A
A0A2K3JVD7	Trifolium	-3.06	0.000207719	0.163	Down-regulated	Acyl-coenzyme A thioesterase 13-like protein	GO:0047617			acyl-CoA hydrolase activity [GO:0047617]	A0A1P8APX5	AT1G04290
A0A2K3JVE2	Trifolium	0.0779	0.698376	0.972	Unchanged	40S ribosomal protein s5-like	GO:0003723; GO:0003735; GO:0005840; GO:0006412; GO:1990904	translation [GO:0006412]	ribonucleoprotein complex [GO:1990904]; ribosome [GO:0005840]	RNA binding [GO:0003723]; structural constituent of ribosome [GO:0003735]	Q9ZUT9	AT2G37270
A0A2K3JVE4	Trifolium	0.343	0.219771	0.942	Unchanged	Serine hydroxymethyltransferase mitochondrial-like	GO:0004372; GO:0008168; GO:0019264; GO:0030170; GO:0032259; GO:0035999	glycine biosynthetic process from serine [GO:0019264]; methylation [GO:0032259]; tetrahydrofolate interconversion [GO:0035999]		glycine hydroxymethyltransferase activity [GO:0004372]; methyltransferase activity [GO:0008168]; pyridoxal phosphate binding [GO:0030170]	Q9SZJ5	AT4G37930
A0A2K3JVF0	Trifolium	0.183	0.440844	0.962	Unchanged	Ubiquitin-fold modifier-conjugating enzyme 1	GO:0061657; GO:0071569	protein ufmylation [GO:0071569]		UFM1 conjugating enzyme activity [GO:0061657]	Q9SXC8	AT1G27530
A0A2K3JVJ0	Trifolium	0.229	0.471633	0.964	Unchanged	Uncharacterized protein					A0A1P8AVS1	#N/A
A0A2K3JVL1	Trifolium	-1.11	0.269458	0.949	Unchanged	Uncharacterized protein					B3H797	AT4G36210
A0A2K3JVM5	Trifolium	-0.0961	0.860566	0.976	Unchanged	alpha-1,2-Mannosidase (EC 3.2.1.-)	GO:0004571; GO:0005509; GO:0005975; GO:0012505; GO:0016020	carbohydrate metabolic process [GO:0005975]	endomembrane system [GO:0012505]; membrane [GO:0016020]	calcium ion binding [GO:0005509]; mannosyl-oligosaccharide 1,2-alpha-mannosidase activity [GO:0004571]	Q8H116	AT3G21160
A0A2K3JVP8	Trifolium	-0.637	0.388349	0.959	Unchanged	Mitochondrial chaperone BCS1					Q9FLD5	AT5G40010
A0A2K3JVQ3	Trifolium	-0.19	0.419674	0.961	Unchanged	26S protease regulatory subunit 7-like protein	GO:0005524; GO:0006508; GO:0008233; GO:0016887	proteolysis [GO:0006508]		ATP binding [GO:0005524]; ATP hydrolysis activity [GO:0016887]; peptidase activity [GO:0008233]	Q9SSB5	AT1G53750
A0A2K3JVR3	Trifolium	-0.6	0.217937	0.942	Unchanged	Lariat debranching enzyme-like protein	GO:0008419; GO:0009793	embryo development ending in seed dormancy [GO:0009793]		RNA lariat debranching enzyme activity [GO:0008419]	Q94K01	AT4G31770
A0A2K3JVS7	Trifolium	-1.22	0.0571106	0.868	Unchanged	CC-NBS-LRR resistance protein	GO:0043531; GO:0050832	defense response to fungus [GO:0050832]		ADP binding [GO:0043531]	Q9LRR4	AT3G14470
A0A2K3JVT8	Trifolium	-1.17	0.0217077	0.761	Down-regulated	UDP-glycosyltransferase 73C2-like protein	GO:0016740			transferase activity [GO:0016740]	Q9ZQ98	AT2G36760
A0A2K3JVU0	Trifolium	0.268	0.30936	0.953	Unchanged	Putative mediator of RNA polymerase II transcription subunit 37c-like protein	GO:0005524; GO:0140662			ATP binding [GO:0005524]; ATP-dependent protein folding chaperone [GO:0140662]	F4KCE5	#N/A
A0A2K3JVU6	Trifolium	0.192	0.795264	0.974	Unchanged	Dirigent protein	GO:0048046		apoplast [GO:0048046]		Q9SKQ2	AT2G21110
A0A2K3JVU8	Trifolium	-1.28	0.0776626	0.891	Unchanged	Transmembrane protein	GO:0016020		membrane [GO:0016020]		Q93VT6	AT5G08540
A0A2K3JVY3	Trifolium	0.571	0.343854	0.956	Unchanged	Argininosuccinate synthase chloroplastic-like	GO:0004055; GO:0005524; GO:0006526	arginine biosynthetic process [GO:0006526]		argininosuccinate synthase activity [GO:0004055]; ATP binding [GO:0005524]	B3H778	#N/A
A0A2K3JVY8	Trifolium	-0.794	0.166822	0.932	Unchanged	Small nuclear ribonucleoprotein G (snRNP-G)	GO:0000387; GO:0003723; GO:0005681	spliceosomal snRNP assembly [GO:0000387]	spliceosomal complex [GO:0005681]	RNA binding [GO:0003723]	O82221	AT2G23930
A0A2K3JVZ7	Trifolium	-1.08	0.0315158	0.809	Down-regulated	40S ribosomal protein s28-like	GO:0003735; GO:0005840; GO:0006412; GO:1990904	translation [GO:0006412]	ribonucleoprotein complex [GO:1990904]; ribosome [GO:0005840]	structural constituent of ribosome [GO:0003735]	Q9SR73	AT5G03850
A0A2K3JW18	Trifolium	-0.344	0.356844	0.957	Unchanged	Heat shock cognate 70 kDa protein 2-like	GO:0005524; GO:0140662			ATP binding [GO:0005524]; ATP-dependent protein folding chaperone [GO:0140662]	F4KCE5	#N/A
A0A2K3JW39	Trifolium	-0.282	0.832064	0.975	Unchanged	Retrovirus-related Pol polyprotein from transposon TNT 1-94					A0A1P8B5G3	#N/A
A0A2K3JW54	Trifolium	0.477	0.222446	0.943	Unchanged	Phosphoenolpyruvate carboxylase 4-like protein	GO:0006099; GO:0008964; GO:0015977	carbon fixation [GO:0015977]; tricarboxylic acid cycle [GO:0006099]		phosphoenolpyruvate carboxylase activity [GO:0008964]	Q8GVE8	AT1G68750
A0A2K3JW90	Trifolium	0.652	0.509119	0.966	Unchanged	MLP-like protein 34-like	GO:0004864; GO:0006952; GO:0009738; GO:0010427; GO:0038023	abscisic acid-activated signaling pathway [GO:0009738]; defense response [GO:0006952]		abscisic acid binding [GO:0010427]; protein phosphatase inhibitor activity [GO:0004864]; signaling receptor activity [GO:0038023]	Q9SSK5	AT1G70890
A0A2K3JWQ6	Trifolium	-1.02	0.0166051	0.722	Down-regulated	60S ribosomal protein l27-like	GO:0003735; GO:0005840; GO:0006412; GO:1990904	translation [GO:0006412]	ribonucleoprotein complex [GO:1990904]; ribosome [GO:0005840]	structural constituent of ribosome [GO:0003735]	P51419	AT4G15000
A0A2K3JWR3	Trifolium	1.49	0.3367	0.956	Unchanged	Ribonuclease H					Q9SZD8	AT4G29090
A0A2K3JWR8	Trifolium	-0.127	0.770399	0.974	Unchanged	glutamate decarboxylase (EC 4.1.1.15)	GO:0004351; GO:0006536; GO:0030170	glutamate metabolic process [GO:0006536]		glutamate decarboxylase activity [GO:0004351]; pyridoxal phosphate binding [GO:0030170]	Q9LSH2	AT3G17760
A0A2K3JWW1	Trifolium	-1.41	0.0116594	0.679	Down-regulated	Conserved oligomeric Golgi complex subunit 8 (Component of oligomeric Golgi complex 8)	GO:0015031; GO:0016020; GO:0017119	protein transport [GO:0015031]	Golgi transport complex [GO:0017119]; membrane [GO:0016020]		A0A1P8BAA7	#N/A
A0A2K3JWX1	Trifolium	-0.601	0.697183	0.972	Unchanged	Diphthine--ammonia ligase (EC 6.3.1.14) (Diphthamide synthase) (Diphthamide synthetase)	GO:0017178			diphthine-ammonia ligase activity [GO:0017178]	F4J3Q1	AT3G04480
A0A2K3JWY3	Trifolium	-0.991	0.0902949	0.9	Unchanged	Centromere/kinetochore protein zw17					O48626	AT2G32900
A0A2K3JX00	Trifolium	-0.666	0.0727803	0.886	Unchanged	Nuclear pore complex protein Nup85-like					Q8RXH2	AT4G32910
A0A2K3JX11	Trifolium	0.403	0.189307	0.937	Unchanged	60S ribosomal protein l9-like	GO:0003735; GO:0005840; GO:0006412; GO:0019843; GO:1990904	translation [GO:0006412]	ribonucleoprotein complex [GO:1990904]; ribosome [GO:0005840]	rRNA binding [GO:0019843]; structural constituent of ribosome [GO:0003735]	P49209	AT1G33140
A0A2K3JX77	Trifolium	-1.06	0.158348	0.93	Unchanged	Lysine-specific demethylase 3B	GO:0008168; GO:0032259; GO:0032454	methylation [GO:0032259]		histone H3K9 demethylase activity [GO:0032454]; methyltransferase activity [GO:0008168]	Q8H1S7	AT4G21430
A0A2K3JXC4	Trifolium	-2.87	0.011072	0.674	Down-regulated	Uncharacterized protein					#N/A	#N/A
A0A2K3JXN5	Trifolium	-0.474	0.381494	0.959	Unchanged	Endoplasmic reticulum metallopeptidase 1-like protein					A0A1P8BHD0	#N/A
A0A2K3JXQ2	Trifolium	-0.313	0.363447	0.958	Unchanged	Pleiotropic drug resistance protein					Q9M9E1	AT1G15520
A0A2K3JXR6	Trifolium	0.0763	0.803189	0.974	Unchanged	Uncharacterized protein					Q9SBB2	AT4G01660
A0A2K3JXU1	Trifolium	-1.05	0.085026	0.897	Unchanged	Translocon-associated protein subunit alpha-like	GO:0016020		membrane [GO:0016020]		F4IGI4	#N/A
A0A2K3JY05	Trifolium	-0.553	0.38338	0.959	Unchanged	N-acetylornithine deacetylase-like protein	GO:0016787			hydrolase activity [GO:0016787]	Q9C5C4	AT4G17830
A0A2K3JYC6	Trifolium	-1.01	0.0801612	0.893	Unchanged	Pathogenesis-related protein pr10	GO:0004864; GO:0006952; GO:0009738; GO:0010427; GO:0038023	abscisic acid-activated signaling pathway [GO:0009738]; defense response [GO:0006952]		abscisic acid binding [GO:0010427]; protein phosphatase inhibitor activity [GO:0004864]; signaling receptor activity [GO:0038023]	#N/A	#N/A
A0A2K3JYF4	Trifolium	0.9	0.0184874	0.738	Up-regulated	Annexin	GO:0005509; GO:0005544; GO:0006950	response to stress [GO:0006950]		calcium ion binding [GO:0005509]; calcium-dependent phospholipid binding [GO:0005544]	Q94CK4	AT5G12380
A0A2K3JYG3	Trifolium	0.587	0.00993334	0.664	Up-regulated	Eukaryotic translation initiation factor 3 subunit g-like protein	GO:0003743			translation initiation factor activity [GO:0003743]	Q9SSJ0	#N/A
A0A2K3JYN5	Trifolium	-1.06	0.0472349	0.851	Down-regulated	WD repeat-containing protein 5-like					Q9M2Z2	AT3G49660
A0A2K3JYQ2	Trifolium	-3.05	0.00513123	0.586	Down-regulated	Dirigent protein	GO:0009699; GO:0048046	phenylpropanoid biosynthetic process [GO:0009699]	apoplast [GO:0048046]		Q9C523	AT1G58170
A0A2K3JYS2	Trifolium	0.324	0.504321	0.965	Unchanged	Beta-glucosidase 42-like protein	GO:0004553; GO:0005975	carbohydrate metabolic process [GO:0005975]		hydrolase activity, hydrolyzing O-glycosyl compounds [GO:0004553]	Q9FIW4	AT5G36890
A0A2K3JYS9	Trifolium	0.397	0.310298	0.953	Unchanged	Heat shock 70 kDa protein	GO:0005524; GO:0140662			ATP binding [GO:0005524]; ATP-dependent protein folding chaperone [GO:0140662]	F4HQD4	AT1G79920
A0A2K3JYV0	Trifolium	0.152	0.413131	0.961	Unchanged	26S protease regulatory subunit 6a-like protein	GO:0006508; GO:0008233	proteolysis [GO:0006508]		peptidase activity [GO:0008233]	O04019	AT1G09100
A0A2K3JZ08	Trifolium	0.459	0.396627	0.96	Unchanged	Pathogenesis-related protein pr10	GO:0004864; GO:0006952; GO:0009607; GO:0009738; GO:0010427; GO:0038023	abscisic acid-activated signaling pathway [GO:0009738]; defense response [GO:0006952]; response to biotic stimulus [GO:0009607]		abscisic acid binding [GO:0010427]; protein phosphatase inhibitor activity [GO:0004864]; signaling receptor activity [GO:0038023]	#N/A	#N/A
A0A2K3JZ43	Trifolium	-0.167	0.553198	0.967	Unchanged	40S ribosomal protein s3a-like	GO:0003735; GO:0005737; GO:0005840; GO:0006412; GO:1990904	translation [GO:0006412]	cytoplasm [GO:0005737]; ribonucleoprotein complex [GO:1990904]; ribosome [GO:0005840]	structural constituent of ribosome [GO:0003735]	Q42262	AT4G34670
A0A2K3JZ44	Trifolium	0.607	0.0680832	0.881	Unchanged	Luminal-binding protein 5-like	GO:0005524; GO:0140662			ATP binding [GO:0005524]; ATP-dependent protein folding chaperone [GO:0140662]	Q9LKR3	AT5G28540
A0A2K3JZD8	Trifolium	0.611	0.232729	0.944	Unchanged	U3 small nucleolar ribonucleoprotein IMP4	GO:0006364; GO:0042134; GO:1990904	rRNA processing [GO:0006364]	ribonucleoprotein complex [GO:1990904]	rRNA primary transcript binding [GO:0042134]	Q9S826	AT1G63780
A0A2K3JZF1	Trifolium	-0.904	0.043909	0.844	Down-regulated	Limonoid UDP-glucosyltransferase-like protein	GO:0008194			UDP-glycosyltransferase activity [GO:0008194]	Q5XF20	AT4G15480
A0A2K3JZF9	Trifolium	0.241	0.600622	0.969	Unchanged	Cdpk-related protein kinase-like protein	GO:0016301; GO:0016310	phosphorylation [GO:0016310]		kinase activity [GO:0016301]	Q9ZUZ2	AT2G46700
A0A2K3JZL0	Trifolium	-0.0631	0.941964	0.977	Unchanged	Trypsin inhibitor	GO:0004867; GO:0005576		extracellular region [GO:0005576]	serine-type endopeptidase inhibitor activity [GO:0004867]	#N/A	#N/A
A0A2K3JZQ1	Trifolium	0.52	0.0934429	0.902	Unchanged	Luminal-binding protein 5-like	GO:0005524; GO:0140662			ATP binding [GO:0005524]; ATP-dependent protein folding chaperone [GO:0140662]	Q9LKR3	AT5G28540
A0A2K3JZY4	Trifolium	0.254	0.322125	0.954	Unchanged	Serine/threonine-protein kinase pakD-like protein	GO:0016020; GO:0016301; GO:0016310	phosphorylation [GO:0016310]	membrane [GO:0016020]	kinase activity [GO:0016301]	F4JQR9	AT4G18150
A0A2K3JZZ3	Trifolium	-0.0442	0.845742	0.975	Unchanged	40S ribosomal protein s3a-like	GO:0003735; GO:0005737; GO:0005840; GO:0006412; GO:1990904	translation [GO:0006412]	cytoplasm [GO:0005737]; ribonucleoprotein complex [GO:1990904]; ribosome [GO:0005840]	structural constituent of ribosome [GO:0003735]	Q9CAV0	AT3G04840
A0A2K3K068	Trifolium	0.113	0.742825	0.973	Unchanged	Dirigent protein	GO:0009699; GO:0048046	phenylpropanoid biosynthetic process [GO:0009699]	apoplast [GO:0048046]		Q66GI2	AT3G13660
A0A2K3K099	Trifolium	-2.12	0.032445	0.813	Down-regulated	Cytochrome p450 83b1-like protein	GO:0004497; GO:0005506; GO:0016020; GO:0016705; GO:0020037		membrane [GO:0016020]	heme binding [GO:0020037]; iron ion binding [GO:0005506]; monooxygenase activity [GO:0004497]; oxidoreductase activity, acting on paired donors, with incorporation or reduction of molecular oxygen [GO:0016705]	Q9LIP3	AT3G26330
A0A2K3K0B1	Trifolium	0.356	0.42276	0.961	Unchanged	Pre-mRNA branch site p14-like protein	GO:0003723; GO:0005634; GO:0006397; GO:0008380	mRNA processing [GO:0006397]; RNA splicing [GO:0008380]	nucleus [GO:0005634]	RNA binding [GO:0003723]	Q9FMP4	AT5G12190
A0A2K3K0K3	Trifolium	0.855	0.040557	0.837	Up-regulated	Isocitrate dehydrogenase					P93032	AT2G17130
A0A2K3K0P0	Trifolium	0.0037	0.986726	0.978	Unchanged	Histone H3.2	GO:0000786; GO:0003677; GO:0030527; GO:0046982		nucleosome [GO:0000786]	DNA binding [GO:0003677]; protein heterodimerization activity [GO:0046982]; structural constituent of chromatin [GO:0030527]	P59226	AT5G65360
A0A2K3K0P1	Trifolium	0.159	0.886769	0.976	Unchanged	Thiosulfate sulfurtransferase 18-like protein	GO:0016740			transferase activity [GO:0016740]	Q9FKW8	AT5G66170
A0A2K3K0R5	Trifolium	-0.446	0.64807	0.971	Unchanged	Putative F-box/LRR protein					Q9M8N0	AT1G80630
A0A2K3K0R8	Trifolium	-0.582	0.115462	0.914	Unchanged	Mitochondrial rho GTPase 1-like protein					Q8RXF8	AT5G27540
A0A2K3K0U7	Trifolium	-0.0371	0.971936	0.977	Unchanged	Protein disulfide isomerase-like 2-3-like	GO:0016853			isomerase activity [GO:0016853]	O48773	AT2G32920
A0A2K3K0X0	Trifolium	-0.06	0.916296	0.977	Unchanged	G3BP-like protein	GO:0016020		membrane [GO:0016020]		F4K7E0	#N/A
A0A2K3K0Y2	Trifolium	-2.76	0.00050432	0.253	Down-regulated	Adenylyltransferase and sulfurtransferase mocs3-like protein	GO:0008641; GO:0016779			nucleotidyltransferase activity [GO:0016779]; ubiquitin-like modifier activating enzyme activity [GO:0008641]	A0A1P8B9T0	#N/A
A0A2K3K108	Trifolium	0.312	0.358041	0.957	Unchanged	WRKY transcription factor	GO:0003700; GO:0005634; GO:0043565		nucleus [GO:0005634]	DNA-binding transcription factor activity [GO:0003700]; sequence-specific DNA binding [GO:0043565]	Q8S8P5	AT2G38470
A0A2K3K163	Trifolium	0.159	0.702088	0.972	Unchanged	Wall-associated receptor kinase 20-like protein	GO:0004672; GO:0005524; GO:0016310	phosphorylation [GO:0016310]		ATP binding [GO:0005524]; protein kinase activity [GO:0004672]	Q9LZM4	AT5G02070
A0A2K3K194	Trifolium	-0.833	0.0292993	0.801	Down-regulated	Anthranilate phosphoribosyltransferase-like protein	GO:0016757			glycosyltransferase activity [GO:0016757]	F4I5H7	AT1G70570
A0A2K3K1A3	Trifolium	-0.551	0.49052	0.965	Unchanged	cellulase (EC 3.2.1.4)	GO:0008810; GO:0030245	cellulose catabolic process [GO:0030245]		cellulase activity [GO:0008810]	A0A1P8B606	#N/A
A0A2K3K1D3	Trifolium	0.0409	0.944797	0.977	Unchanged	Large ribosomal subunit protein uL16m (60S ribosomal protein L16, mitochondrial)	GO:0003735; GO:0005739; GO:0005840; GO:0006412; GO:0009507; GO:0019843; GO:1990904	translation [GO:0006412]	chloroplast [GO:0009507]; mitochondrion [GO:0005739]; ribonucleoprotein complex [GO:1990904]; ribosome [GO:0005840]	rRNA binding [GO:0019843]; structural constituent of ribosome [GO:0003735]	Q95747	#N/A
A0A2K3K1G7	Trifolium	0.309	0.639819	0.97	Unchanged	Putative LRR receptor-like protein kinase	GO:0016301; GO:0016310	phosphorylation [GO:0016310]		kinase activity [GO:0016301]	C0LGD9	AT1G07560
A0A2K3K1J4	Trifolium	-1.69	0.00275786	0.501	Down-regulated	Isoflavone 2'-hydroxylase-like protein	GO:0004497; GO:0005506; GO:0016020; GO:0016705; GO:0020037		membrane [GO:0016020]	heme binding [GO:0020037]; iron ion binding [GO:0005506]; monooxygenase activity [GO:0004497]; oxidoreductase activity, acting on paired donors, with incorporation or reduction of molecular oxygen [GO:0016705]	O23155	AT4G37330
A0A2K3K1P7	Trifolium	0.386	0.236903	0.945	Unchanged	Stromal 70 kDa heat shock-related protein chloroplastic-like	GO:0005524; GO:0140662			ATP binding [GO:0005524]; ATP-dependent protein folding chaperone [GO:0140662]	Q9STW6	AT4G24280
A0A2K3K1R5	Trifolium	-1.42	0.019078	0.743	Down-regulated	Embryo-specific 3	GO:0005737		cytoplasm [GO:0005737]		Q681K2	AT2G41475
A0A2K3K1U3	Trifolium	-0.235	0.703374	0.972	Unchanged	Caffeic acid 3-O-methyltransferase-like protein	GO:0008757; GO:0032259; GO:0046983	methylation [GO:0032259]		protein dimerization activity [GO:0046983]; S-adenosylmethionine-dependent methyltransferase activity [GO:0008757]	Q9FK25	AT5G54160
A0A2K3K283	Trifolium	-0.207	0.677224	0.971	Unchanged	Uncharacterized protein					A0A1P8B868	#N/A
A0A2K3K2C7	Trifolium	5.42	0.0190487	0.742	Up-regulated	Pleiotropic drug resistance protein 1-like	GO:0005524; GO:0016887			ATP binding [GO:0005524]; ATP hydrolysis activity [GO:0016887]	Q9M9E1	AT1G15520
A0A2K3K2C8	Trifolium	-0.787	0.156393	0.929	Unchanged	Plastid-lipid-associated protein chloroplastic-like					O81439	AT4G04020
A0A2K3K2F5	Trifolium	-1.27	0.16694	0.932	Unchanged	Cellulose synthase A catalytic subunit 1	GO:0016020; GO:0016760; GO:0030244	cellulose biosynthetic process [GO:0030244]	membrane [GO:0016020]	cellulose synthase (UDP-forming) activity [GO:0016760]	O48946	AT4G32410
A0A2K3K2H1	Trifolium	0.649	0.4701	0.964	Unchanged	WD repeat domain phosphoinositide-interacting protein 3-like					F4IZI7	#N/A
A0A2K3K2H3	Trifolium	-1.49	0.00234649	0.48	Down-regulated	Ataxin-10					O81325	AT4G00231
A0A2K3K2P7	Trifolium	-0.448	0.269896	0.949	Unchanged	26S proteasome non-ATPase regulatory subunit 4-like protein	GO:0000502		proteasome complex [GO:0000502]		P55034	AT4G38630
A0A2K3K2U4	Trifolium	0.224	0.643693	0.97	Unchanged	DEAD-box ATP-dependent RNA helicase 42-like protein	GO:0003723; GO:0004386; GO:0005524; GO:0016787			ATP binding [GO:0005524]; helicase activity [GO:0004386]; hydrolase activity [GO:0016787]; RNA binding [GO:0003723]	Q8H0U8	AT1G20920
A0A2K3K2V5	Trifolium	0.362	0.670376	0.971	Unchanged	Phosphoglycerate mutase family protein					Q9M217	AT3G60415
A0A2K3K2V8	Trifolium	-0.371	0.212679	0.941	Unchanged	Ap-1 complex subunit mu-1-like protein	GO:0006886; GO:0016192; GO:0030131	intracellular protein transport [GO:0006886]; vesicle-mediated transport [GO:0016192]	clathrin adaptor complex [GO:0030131]		O22715	AT1G60780
A0A2K3K2W6	Trifolium	1.44	0.035407	0.822	Up-regulated	UDP-glycosyltransferase 79B6-like protein	GO:0008194			UDP-glycosyltransferase activity [GO:0008194]	Q9FN28	AT5G53990
A0A2K3K302	Trifolium	0.154	0.803795	0.974	Unchanged	Putative carboxylesterase 2-like protein	GO:0016787			hydrolase activity [GO:0016787]	Q9SX78	AT1G47480
A0A2K3K3C1	Trifolium	-0.0354	0.96408	0.977	Unchanged	Cdp-diacylglycerol-glycerol-3-phosphate 3-phosphatidyltransferase-like protein	GO:0008654; GO:0016020; GO:0016780	phospholipid biosynthetic process [GO:0008654]	membrane [GO:0016020]	phosphotransferase activity, for other substituted phosphate groups [GO:0016780]	Q9M2W3	AT3G55030
A0A2K3K3D8	Trifolium	-1.13	0.0982803	0.905	Unchanged	Regulator of nonsense transcripts UPF3-like protein	GO:0000184; GO:0003676	nuclear-transcribed mRNA catabolic process, nonsense-mediated decay [GO:0000184]		nucleic acid binding [GO:0003676]	Q9FVW4	AT1G33980
A0A2K3K3I4	Trifolium	1.08	0.300223	0.952	Unchanged	Leu-rich receptor serine/threonine protein kinase BAK1	GO:0004674; GO:0005524; GO:0016310	phosphorylation [GO:0016310]		ATP binding [GO:0005524]; protein serine/threonine kinase activity [GO:0004674]	F4JIX9	#N/A
A0A2K3K3J8	Trifolium	-1.64	0.0112441	0.675	Down-regulated	U4/U6 small nuclear ribonucleoprotein Prp4-like	GO:1990904		ribonucleoprotein complex [GO:1990904]		O22212	AT2G41500
A0A2K3K3L5	Trifolium	0.273	0.483652	0.965	Unchanged	Mitochondrial chaperone BCS1					Q9LH84	AT3G28510
A0A2K3K3R3	Trifolium	0.36	0.465637	0.964	Unchanged	Protein AAR2					Q9C711	AT1G66510
A0A2K3K3T6	Trifolium	-0.0797	0.767424	0.974	Unchanged	Eukaryotic translation initiation factor 3 subunit a	GO:0003743; GO:0005852		eukaryotic translation initiation factor 3 complex [GO:0005852]	translation initiation factor activity [GO:0003743]	Q9LD55	AT4G11420
A0A2K3K3U4	Trifolium	-0.308	0.231862	0.944	Unchanged	Small nuclear ribonucleoprotein Sm D2 (Sm-D2) (snRNP core protein D2)	GO:0003723; GO:0005737; GO:0006397; GO:0008380; GO:0030532	mRNA processing [GO:0006397]; RNA splicing [GO:0008380]	cytoplasm [GO:0005737]; small nuclear ribonucleoprotein complex [GO:0030532]	RNA binding [GO:0003723]	Q8RUH0	AT2G47640
A0A2K3K3W6	Trifolium	-1.29	0.182051	0.935	Unchanged	Putative polygalacturonase-like protein	GO:0004650; GO:0005975	carbohydrate metabolic process [GO:0005975]		polygalacturonase activity [GO:0004650]	Q9SMT3	AT3G48950
A0A2K3K3Z2	Trifolium	-2.39	0.0236667	0.773	Down-regulated	Vacuolar sorting-associated protein 20-like	GO:0007034	vacuolar transport [GO:0007034]			Q9FY89	AT5G09260
A0A2K3K4B3	Trifolium	-0.617	0.286082	0.951	Unchanged	Pathogen-related protein					F4IBV0	#N/A
A0A2K3K4E5	Trifolium	-2.13	0.00353791	0.53	Down-regulated	Phospho-2-dehydro-3-deoxyheptonate aldolase (EC 2.5.1.54)	GO:0003849; GO:0008652; GO:0009073; GO:0009423; GO:0009507	amino acid biosynthetic process [GO:0008652]; aromatic amino acid family biosynthetic process [GO:0009073]; chorismate biosynthetic process [GO:0009423]	chloroplast [GO:0009507]	3-deoxy-7-phosphoheptulonate synthase activity [GO:0003849]	Q9SK84	AT1G22410
A0A2K3K4H5	Trifolium	-0.367	0.253869	0.947	Unchanged	Long chain acyl-CoA synthetase 8-like protein	GO:0004467			long-chain fatty acid-CoA ligase activity [GO:0004467]	A0A1P8AQK5	#N/A
A0A2K3K4J2	Trifolium	-0.452	0.0539991	0.863	Unchanged	Glycine-tRNA ligase 1 mitochondrial-like	GO:0004812; GO:0005524; GO:0006418	tRNA aminoacylation for protein translation [GO:0006418]		aminoacyl-tRNA ligase activity [GO:0004812]; ATP binding [GO:0005524]	O23627	AT1G29880
A0A2K3K4Q2	Trifolium	0.392	0.556244	0.968	Unchanged	Plasma membrane H+-ATPase					Q9LV11	AT5G62670
A0A2K3K4V6	Trifolium	0.571	0.197921	0.939	Unchanged	Peptidyl serine alpha-galactosyltransferase	GO:0016020; GO:0016757		membrane [GO:0016020]	glycosyltransferase activity [GO:0016757]	Q8VYF9	AT3G01720
A0A2K3K4Z1	Trifolium	-0.244	0.214472	0.941	Unchanged	60S ribosomal protein l18a-like	GO:0003735; GO:0005840; GO:0006412	translation [GO:0006412]	ribosome [GO:0005840]	structural constituent of ribosome [GO:0003735]	P51418	AT2G34480
A0A2K3K501	Trifolium	-1.11	0.00118383	0.371	Down-regulated	Aspartate-tRNA ligase cytoplasmic-like	GO:0004815; GO:0005524; GO:0005737; GO:0006422	aspartyl-tRNA aminoacylation [GO:0006422]	cytoplasm [GO:0005737]	aspartate-tRNA ligase activity [GO:0004815]; ATP binding [GO:0005524]	Q9M084	AT4G31180
A0A2K3K504	Trifolium	-0.482	0.172774	0.933	Unchanged	RNA recognition motif-containing protein	GO:0003723			RNA binding [GO:0003723]	O22703	AT1G60650
A0A2K3K510	Trifolium	-0.104	0.664076	0.971	Unchanged	60S ribosomal protein L27	GO:0003735; GO:0005840; GO:0006412; GO:1990904	translation [GO:0006412]	ribonucleoprotein complex [GO:1990904]; ribosome [GO:0005840]	structural constituent of ribosome [GO:0003735]	P51419	AT4G15000
A0A2K3K5F7	Trifolium	-1.34	0.00100803	0.349	Down-regulated	Dolichyl-diphosphooligosaccharide--protein glycosyltransferase subunit 2 (Ribophorin-2)	GO:0006487; GO:0008250; GO:0016740	protein N-linked glycosylation [GO:0006487]	oligosaccharyltransferase complex [GO:0008250]	transferase activity [GO:0016740]	Q93Z16	AT4G21150
A0A2K3K5F8	Trifolium	-0.00847	0.984986	0.978	Unchanged	Blue copper protein	GO:0009055			electron transfer activity [GO:0009055]	O80517	AT2G44790
A0A2K3K5G3	Trifolium	0.0284	0.944961	0.977	Unchanged	Carboxypeptidase (EC 3.4.16.-)	GO:0004185; GO:0005576; GO:0006508	proteolysis [GO:0006508]	extracellular region [GO:0005576]	serine-type carboxypeptidase activity [GO:0004185]	Q56WF8	AT3G45010
A0A2K3K5G8	Trifolium	-0.106	0.74995	0.973	Unchanged	Ribonuclease H	GO:0003676; GO:0004523			nucleic acid binding [GO:0003676]; RNA-DNA hybrid ribonuclease activity [GO:0004523]	O64712	AT2G02650
A0A2K3K5I7	Trifolium	0.485	0.359432	0.957	Unchanged	Protein RCC2-like					F4HQZ1	AT1G19880
A0A2K3K5K4	Trifolium	-0.742	0.378218	0.959	Unchanged	Beta-glucosidase 44-like protein	GO:0004553; GO:0005975	carbohydrate metabolic process [GO:0005975]		hydrolase activity, hydrolyzing O-glycosyl compounds [GO:0004553]	Q9LV33	AT3G18080
A0A2K3K5L2	Trifolium	-0.077	0.842676	0.975	Unchanged	Uncharacterized protein	GO:0005789; GO:0070072	vacuolar proton-transporting V-type ATPase complex assembly [GO:0070072]	endoplasmic reticulum membrane [GO:0005789]		A0A1P8BD54	AT5G52980
A0A2K3K5V8	Trifolium	0.176	0.482381	0.965	Unchanged	EDS1 EP domain-containing protein	GO:0006952; GO:0052689	defense response [GO:0006952]		carboxylic ester hydrolase activity [GO:0052689]	Q4F883	AT5G14930
A0A2K3K618	Trifolium	0.0248	0.919387	0.977	Unchanged	Putative inactive purple acid phosphatase 2-like protein	GO:0003993; GO:0005576; GO:0046872		extracellular region [GO:0005576]	acid phosphatase activity [GO:0003993]; metal ion binding [GO:0046872]	Q9ZQ81	AT2G03450
A0A2K3K621	Trifolium	0.261	0.312052	0.954	Unchanged	U4/U6 small nuclear ribonucleoprotein Prp4-like	GO:1990904		ribonucleoprotein complex [GO:1990904]		O22212	AT2G41500
A0A2K3K626	Trifolium	1.13	0.144161	0.925	Unchanged	Ketol-acid reductoisomerase chloroplastic-like	GO:0016491; GO:0016853			isomerase activity [GO:0016853]; oxidoreductase activity [GO:0016491]	Q05758	AT3G58610
A0A2K3K664	Trifolium	0.141	0.800194	0.974	Unchanged	1-phosphatidylinositol phosphodiesterase-like protein	GO:0006629; GO:0008081	lipid metabolic process [GO:0006629]		phosphoric diester hydrolase activity [GO:0008081]	Q9SZP6	AT4G38690
A0A2K3K670	Trifolium	0.315	0.19408	0.938	Unchanged	Proliferation-associated protein 2G4-like					Q96327	AT3G51800
A0A2K3K6N0	Trifolium	-0.145	0.747986	0.973	Unchanged	Ribonuclease H					F4ICS8	AT1G43760
A0A2K3K6U7	Trifolium	0.144	0.547334	0.967	Unchanged	XH/XS domain protein	GO:0080188	gene silencing by RNA-directed DNA methylation [GO:0080188]			Q9S9P3	AT1G15910
A0A2K3K714	Trifolium	-0.37	0.147759	0.926	Unchanged	U2 small nuclear ribonucleoprotein B	GO:1990904		ribonucleoprotein complex [GO:1990904]		Q8GYT5	AT3G13700
A0A2K3K7A4	Trifolium	0.271	0.638621	0.97	Unchanged	UDP-glycosyltransferase 73C2-like protein	GO:0008194; GO:0071704	organic substance metabolic process [GO:0071704]		UDP-glycosyltransferase activity [GO:0008194]	Q9SCP6	AT3G53150
A0A2K3K7C0	Trifolium	0.602	0.326521	0.955	Unchanged	laccase (EC 1.10.3.2)	GO:0046274; GO:0048046; GO:0052716	lignin catabolic process [GO:0046274]	apoplast [GO:0048046]	hydroquinone:oxygen oxidoreductase activity [GO:0052716]	A0A178V5P5	#N/A
A0A2K3K7E4	Trifolium	-0.558	0.506158	0.966	Unchanged	Vacuolar sorting-associated protein 16	GO:0006886; GO:0007033	intracellular protein transport [GO:0006886]; vacuole organization [GO:0007033]			Q93VQ0	AT2G38020
A0A2K3K7G8	Trifolium	0.778	0.0639783	0.877	Unchanged	Cysteine proteinase rd21a-like protein	GO:0006508; GO:0008234	proteolysis [GO:0006508]		cysteine-type peptidase activity [GO:0008234]	P43297	AT1G47128
A0A2K3K7K6	Trifolium	-0.0214	0.942626	0.977	Unchanged	Pentatricopeptide repeat-containing protein at1g10270-like protein					Q9SY69	AT1G10270
A0A2K3K7L0	Trifolium	0.472	0.10269	0.908	Unchanged	Putative inactive purple acid phosphatase 1-like protein	GO:0016787			hydrolase activity [GO:0016787]	Q8H1R2	AT4G24890
A0A2K3K7Q5	Trifolium	-0.219	0.377834	0.959	Unchanged	Myosin-H heavy chain-like protein					A0A1P8ARX4	#N/A
A0A2K3K7V4	Trifolium	0.602	0.269061	0.949	Unchanged	Pentatricopeptide (PPR) repeat protein					Q9LQ14	AT1G62930
A0A2K3K880	Trifolium	-0.431	0.220259	0.942	Unchanged	Dipeptidyl peptidase family member 6	GO:0006508; GO:0008236	proteolysis [GO:0006508]		serine-type peptidase activity [GO:0008236]	F4K2Y3	AT5G36210
A0A2K3K8C4	Trifolium	0.023	0.905202	0.976	Unchanged	Ubiquitin carboxyl-terminal hydrolase 14-like protein	GO:0016787			hydrolase activity [GO:0016787]	Q8L6Y1	AT3G20630
A0A2K3K8E6	Trifolium	0.0389	0.898442	0.976	Unchanged	26S protease regulatory subunit 6b	GO:0000502; GO:0006508; GO:0008233	proteolysis [GO:0006508]	proteasome complex [GO:0000502]	peptidase activity [GO:0008233]	Q9SEI4	AT5G58290
A0A2K3K8G4	Trifolium	-0.781	0.0831783	0.895	Unchanged	cinnamyl-alcohol dehydrogenase (EC 1.1.1.195)	GO:0008270; GO:0009809; GO:0016616	lignin biosynthetic process [GO:0009809]		oxidoreductase activity, acting on the CH-OH group of donors, NAD or NADP as acceptor [GO:0016616]; zinc ion binding [GO:0008270]	P48523	AT3G19450
A0A2K3K8S7	Trifolium	-0.161	0.652915	0.971	Unchanged	Dolichyl-diphosphooligosaccharide--protein glycosyltransferase subunit 1	GO:0006487; GO:0008250; GO:0016740	protein N-linked glycosylation [GO:0006487]	oligosaccharyltransferase complex [GO:0008250]	transferase activity [GO:0016740]	Q9SFX3	AT1G76400
A0A2K3K8T0	Trifolium	-0.237	0.649331	0.971	Unchanged	DNA-directed RNA polymerase (EC 2.7.7.6)	GO:0000428; GO:0003677; GO:0003899; GO:0006351; GO:0032549	DNA-templated transcription [GO:0006351]	DNA-directed RNA polymerase complex [GO:0000428]	DNA binding [GO:0003677]; DNA-directed 5'-3' RNA polymerase activity [GO:0003899]; ribonucleoside binding [GO:0032549]	P38420	AT4G21710
A0A2K3K8U5	Trifolium	-0.51	0.238454	0.945	Unchanged	Amine oxidase (EC 1.4.3.-)	GO:0005507; GO:0009308; GO:0042221; GO:0048038; GO:0052593; GO:0052594; GO:0052596	amine metabolic process [GO:0009308]; response to chemical [GO:0042221]		aminoacetone:oxygen oxidoreductase(deaminating) activity [GO:0052594]; copper ion binding [GO:0005507]; phenethylamine:oxygen oxidoreductase (deaminating) activity [GO:0052596]; quinone binding [GO:0048038]; tryptamine:oxygen oxidoreductase (deaminating) activity [GO:0052593]	F4IAX0	AT1G31690
A0A2K3K8Y9	Trifolium	0.352	0.482729	0.965	Unchanged	Aspartyl-tRNA synthetase	GO:0003677; GO:0004812; GO:0005737		cytoplasm [GO:0005737]	aminoacyl-tRNA ligase activity [GO:0004812]; DNA binding [GO:0003677]	F4JJT9	AT4G33760
A0A2K3K969	Trifolium	0.491	0.220079	0.942	Unchanged	Putative inactive receptor kinase	GO:0004713; GO:0005524; GO:0016310	phosphorylation [GO:0016310]		ATP binding [GO:0005524]; protein tyrosine kinase activity [GO:0004713]	Q93Y06	AT5G67200
A0A2K3K9G1	Trifolium	-1.17	0.0764868	0.89	Unchanged	Isoflavone 2'-hydroxylase-like protein	GO:0004497; GO:0005506; GO:0016020; GO:0016705; GO:0020037		membrane [GO:0016020]	heme binding [GO:0020037]; iron ion binding [GO:0005506]; monooxygenase activity [GO:0004497]; oxidoreductase activity, acting on paired donors, with incorporation or reduction of molecular oxygen [GO:0016705]	Q9LVD6	AT5G57220
A0A2K3K9P9	Trifolium	-0.122	0.49612	0.965	Unchanged	Peptidyl-prolyl cis-trans isomerase (PPIase) (EC 5.2.1.8)	GO:0003755; GO:0006457	protein folding [GO:0006457]		peptidyl-prolyl cis-trans isomerase activity [GO:0003755]	Q8W4D0	AT3G44600
A0A2K3K9R2	Trifolium	-0.61	0.247523	0.946	Unchanged	Ubiquitin-fold modifier 1	GO:0071569	protein ufmylation [GO:0071569]			Q9CA23	AT1G77710
A0A2K3K9R3	Trifolium	0.786	0.193951	0.938	Unchanged	Elongation factor Ts mitochondrial-like	GO:0003746			translation elongation factor activity [GO:0003746]	Q5XF75	AT4G11120
A0A2K3K9V2	Trifolium	0.296	0.500146	0.965	Unchanged	xyloglucan:xyloglucosyl transferase (EC 2.4.1.207)	GO:0004553; GO:0016762; GO:0044042; GO:0048046	glucan metabolic process [GO:0044042]	apoplast [GO:0048046]	hydrolase activity, hydrolyzing O-glycosyl compounds [GO:0004553]; xyloglucan:xyloglucosyl transferase activity [GO:0016762]	Q38857	AT5G57560
A0A2K3K9Y3	Trifolium	0.343	0.832721	0.975	Unchanged	Uncharacterized protein					#N/A	#N/A
A0A2K3K9Z5	Trifolium	1.63	0.132988	0.922	Unchanged	Eukaryotic translation initiation factor 3 subunit e-like protein	GO:0003743; GO:0005852; GO:0008757		eukaryotic translation initiation factor 3 complex [GO:0005852]	S-adenosylmethionine-dependent methyltransferase activity [GO:0008757]; translation initiation factor activity [GO:0003743]	Q9C5Z3	AT3G57290
A0A2K3KAC1	Trifolium	0.216	0.675222	0.971	Unchanged	Hydroxyproline-rich glycoprotein	GO:0003729; GO:0006402; GO:0032451	mRNA catabolic process [GO:0006402]		demethylase activity [GO:0032451]; mRNA binding [GO:0003729]	F4HWB0	AT1G14710
A0A2K3KAE0	Trifolium	0.186	0.759503	0.973	Unchanged	Protein root hair defective 3	GO:0005525; GO:0016020		membrane [GO:0016020]	GTP binding [GO:0005525]	Q9FKE9	AT5G45160
A0A2K3KAN2	Trifolium	-1.86	0.00746742	0.634	Down-regulated	ABC transporter C family member 3-like protein	GO:0005524; GO:0016887			ATP binding [GO:0005524]; ATP hydrolysis activity [GO:0016887]	F4JB38	#N/A
A0A2K3KAU4	Trifolium	-0.968	0.0705237	0.884	Unchanged	Phosphoglucan water dikinase	GO:0016301; GO:0016310	phosphorylation [GO:0016310]		kinase activity [GO:0016301]	B3H4K8	#N/A
A0A2K3KAV9	Trifolium	0.519	0.510243	0.966	Unchanged	Potassium transporter 6-like protein	GO:0005886; GO:0015079		plasma membrane [GO:0005886]	potassium ion transmembrane transporter activity [GO:0015079]	Q8W4I4	AT1G70300
A0A2K3KAX4	Trifolium	0.0702	0.939363	0.977	Unchanged	Quinone oxidoreductase PIG3-like protein					A8MRW5	#N/A
A0A2K3KAY2	Trifolium	-0.303	0.541801	0.967	Unchanged	L-3-cyanoalanine synthase mitochondrial-like					A0A1I9LTP2	#N/A
A0A2K3KAY8	Trifolium	-2.25	0.000949059	0.341	Down-regulated	D-alanine-d-alanine ligase family protein	GO:0016874			ligase activity [GO:0016874]	A0A1I9LPE1	#N/A
A0A2K3KAZ5	Trifolium	-0.248	0.25316	0.947	Unchanged	Aspartyl aminopeptidase	GO:0004177; GO:0006508; GO:0008270	proteolysis [GO:0006508]		aminopeptidase activity [GO:0004177]; zinc ion binding [GO:0008270]	Q9LST0	AT5G60160
A0A2K3KB24	Trifolium	-0.272	0.45466	0.963	Unchanged	Sulfite oxidase-like protein	GO:0016491; GO:0030151			molybdenum ion binding [GO:0030151]; oxidoreductase activity [GO:0016491]	A8MRF8	#N/A
A0A2K3KB38	Trifolium	0.0869	0.785876	0.974	Unchanged	Elongation factor G mitochondrial-like	GO:0003746			translation elongation factor activity [GO:0003746]	A0A1P8AQG8	#N/A
A0A2K3KBA5	Trifolium	-2.2	0.00513446	0.586	Down-regulated	Ribosomal protein S18	GO:0005840		ribosome [GO:0005840]		#N/A	#N/A
A0A2K3KBD9	Trifolium	1.24	0.38135	0.959	Unchanged	Uncharacterized protein					#N/A	#N/A
A0A2K3KBE8	Trifolium	1.44	0.0107441	0.671	Up-regulated	Multiple inositol polyphosphate phosphatase 1-like protein					Q941B2	AT1G09870
A0A2K3KBN0	Trifolium	-0.0796	0.833223	0.975	Unchanged	Putative beta-xylosyltransferase irx10l-like protein	GO:0000139; GO:0016757		Golgi membrane [GO:0000139]	glycosyltransferase activity [GO:0016757]	A0A1P8BEB5	#N/A
A0A2K3KBS9	Trifolium	-0.149	0.871331	0.976	Unchanged	Tubulin alpha chain-like protein	GO:0005200; GO:0005525; GO:0005874; GO:0007017; GO:0016787	microtubule-based process [GO:0007017]	microtubule [GO:0005874]	GTP binding [GO:0005525]; hydrolase activity [GO:0016787]; structural constituent of cytoskeleton [GO:0005200]	B9DFF8	#N/A
A0A2K3KC29	Trifolium	-0.433	0.482561	0.965	Unchanged	Uncharacterized protein					Q9FGP9	AT5G22790
A0A2K3KC34	Trifolium	0.278	0.346168	0.956	Unchanged	Large subunit GTPase-like protein					Q9SHS8	AT2G27200
A0A2K3KCE4	Trifolium	0.676	0.0371788	0.828	Up-regulated	Glucan endo-1,3-beta-glucosidase-like protein 2-like	GO:0009506; GO:0098552		plasmodesma [GO:0009506]; side of membrane [GO:0098552]		A0A178WIT1	#N/A
A0A2K3KCI5	Trifolium	-1.96	0.0274777	0.793	Down-regulated	Ribosomal protein L2	GO:0003735; GO:0005840; GO:0006412; GO:1990904	translation [GO:0006412]	ribonucleoprotein complex [GO:1990904]; ribosome [GO:0005840]	structural constituent of ribosome [GO:0003735]	P93311	#N/A
A0A2K3KCK1	Trifolium	0.0228	0.949346	0.977	Unchanged	Heat shock cognate 70 kDa protein 2-like	GO:0005524; GO:0140662			ATP binding [GO:0005524]; ATP-dependent protein folding chaperone [GO:0140662]	F4KCE5	#N/A
A0A2K3KCM6	Trifolium	-0.348	0.401954	0.96	Unchanged	60S ribosomal protein l10a-1-like	GO:0005840		ribosome [GO:0005840]		Q8VZB9	AT1G08360
A0A2K3KCQ0	Trifolium	2.22	0.0112371	0.675	Up-regulated	Dynamin-related protein 3a-like	GO:0003924; GO:0005525; GO:0005737		cytoplasm [GO:0005737]	GTP binding [GO:0005525]; GTPase activity [GO:0003924]	Q8S944	AT4G33650
A0A2K3KCS2	Trifolium	-2.39	0.000267733	0.181	Down-regulated	ABC transporter B family member	GO:0005524; GO:0016020; GO:0140359		membrane [GO:0016020]	ABC-type transporter activity [GO:0140359]; ATP binding [GO:0005524]	Q9FWX7	AT1G02520
A0A2K3KD04	Trifolium	0.137	0.574447	0.968	Unchanged	Nuclear pore protein	GO:0004386; GO:0005643; GO:0015031; GO:0016020; GO:0017056; GO:0051028	mRNA transport [GO:0051028]; protein transport [GO:0015031]	membrane [GO:0016020]; nuclear pore [GO:0005643]	helicase activity [GO:0004386]; structural constituent of nuclear pore [GO:0017056]	O22224	AT2G41620
A0A2K3KDL5	Trifolium	-0.299	0.577308	0.968	Unchanged	NAD(P)H-dependent 6'-deoxychalcone synthase-like protein	GO:0016491; GO:0044281; GO:0071704	organic substance metabolic process [GO:0071704]; small molecule metabolic process [GO:0044281]		oxidoreductase activity [GO:0016491]	Q1PFI5	AT1G59950
A0A2K3KDQ2	Trifolium	-0.805	0.103393	0.908	Unchanged	Histone H1	GO:0000786; GO:0003677; GO:0005634; GO:0006334; GO:0008757; GO:0030527	nucleosome assembly [GO:0006334]	nucleosome [GO:0000786]; nucleus [GO:0005634]	DNA binding [GO:0003677]; S-adenosylmethionine-dependent methyltransferase activity [GO:0008757]; structural constituent of chromatin [GO:0030527]	F4INW2	#N/A
A0A2K3KDQ7	Trifolium	-0.742	0.0374926	0.829	Down-regulated	Ubiquitin-like domain-containing CTD phosphatase-like protein					Q8W3M6	AT4G06599
A0A2K3KDV2	Trifolium	-1.41	0.00108828	0.359	Down-regulated	DNA-directed RNA polymerase e subunit 1-like protein	GO:0000428		DNA-directed RNA polymerase complex [GO:0000428]		Q5D869	AT2G40030
A0A2K3KDW2	Trifolium	0.259	0.131509	0.921	Unchanged	2-oxoglutarate dehydrogenase mitochondrial-like	GO:0004591; GO:0006099; GO:0030976	tricarboxylic acid cycle [GO:0006099]		oxoglutarate dehydrogenase (succinyl-transferring) activity [GO:0004591]; thiamine pyrophosphate binding [GO:0030976]	F4IWV2	AT3G55410
A0A2K3KED9	Trifolium	-1.45	0.079366	0.892	Unchanged	Ribulose-phosphate 3-epimerase cytoplasmic	GO:0005975; GO:0016857; GO:0046872	carbohydrate metabolic process [GO:0005975]		metal ion binding [GO:0046872]; racemase and epimerase activity, acting on carbohydrates and derivatives [GO:0016857]	Q9C8T3	AT1G63290
A0A2K3KEL6	Trifolium	-0.16	0.647643	0.971	Unchanged	Dirigent protein	GO:0009699; GO:0048046	phenylpropanoid biosynthetic process [GO:0009699]	apoplast [GO:0048046]		Q67YM6	AT1G22900
A0A2K3KEP2	Trifolium	-0.111	0.865378	0.976	Unchanged	Uncharacterized protein					#N/A	#N/A
A0A2K3KER9	Trifolium	2.68	0.000392705	0.221	Up-regulated	Uncharacterized protein					Q9SX24	AT1G68610
A0A2K3KEW8	Trifolium	0.13	0.783332	0.974	Unchanged	Outer membrane lipoprotein blc-like	GO:0006950	response to stress [GO:0006950]			Q9FGT8	AT5G58070
A0A2K3KF97	Trifolium	0.18	0.670712	0.971	Unchanged	WD repeat domain phosphoinositide-interacting protein 3-like					F4IZI7	#N/A
A0A2K3KFC8	Trifolium	1.4	0.023081	0.77	Up-regulated	Histidinol dehydrogenase chloroplastic-like	GO:0016616; GO:0046872; GO:0051287			metal ion binding [GO:0046872]; NAD binding [GO:0051287]; oxidoreductase activity, acting on the CH-OH group of donors, NAD or NADP as acceptor [GO:0016616]	Q9C5U8	AT5G63890
A0A2K3KFF9	Trifolium	0.752	0.113387	0.913	Unchanged	Dynamin-related protein 3a-like	GO:0003924; GO:0005525; GO:0005737		cytoplasm [GO:0005737]	GTP binding [GO:0005525]; GTPase activity [GO:0003924]	F4JJ15	#N/A
A0A2K3KFI2	Trifolium	0.752	0.178141	0.934	Unchanged	Putative ubiquitin fusion degradaton protein					A0A1P8B7F5	AT4G15420
A0A2K3KFP2	Trifolium	0.0133	0.959026	0.977	Unchanged	XH/XS domain protein	GO:0080188	gene silencing by RNA-directed DNA methylation [GO:0080188]			A0A1P8APP5	#N/A
A0A2K3KFR8	Trifolium	-1.29	0.0439447	0.845	Down-regulated	Shewenella-like protein phosphatase 2	GO:0005829; GO:0016791; GO:0030145		cytosol [GO:0005829]	manganese ion binding [GO:0030145]; phosphatase activity [GO:0016791]	Q944L7	AT1G18480
A0A2K3KG63	Trifolium	0.746	0.339548	0.956	Unchanged	DNA gyrase subunit A chloroplastic/mitochondrial-like	GO:0003677; GO:0003918; GO:0005524; GO:0006265	DNA topological change [GO:0006265]		ATP binding [GO:0005524]; DNA binding [GO:0003677]; DNA topoisomerase type II (double strand cut, ATP-hydrolyzing) activity [GO:0003918]	Q9CAF6	AT3G10690
A0A2K3KG64	Trifolium	-1.7	0.21544	0.942	Unchanged	Uncharacterized protein					#N/A	#N/A
A0A2K3KG78	Trifolium	-0.14	0.563004	0.968	Unchanged	Acyl-peptide hydrolase-like protein	GO:0016787			hydrolase activity [GO:0016787]	F4K2Y3	AT5G36210
A0A2K3KG99	Trifolium	-0.0324	0.90705	0.976	Unchanged	Uncharacterized protein					#N/A	#N/A
A0A2K3KGN9	Trifolium	0.58	0.0392009	0.833	Unchanged	Pleiotropic drug resistance protein 1-like	GO:0005524; GO:0016887			ATP binding [GO:0005524]; ATP hydrolysis activity [GO:0016887]	Q9M9E1	AT1G15520
A0A2K3KH81	Trifolium	-0.42	0.433569	0.962	Unchanged	Quinone-oxidoreductase chloroplastic-like					Q9SV68	AT4G13010
A0A2K3KHA1	Trifolium	0.183	0.444845	0.963	Unchanged	Nucleolar protein 56-like	GO:0030515; GO:0031428; GO:0032040		box C/D RNP complex [GO:0031428]; small-subunit processome [GO:0032040]	snoRNA binding [GO:0030515]	Q9LTV0	AT3G12860
A0A2K3KHB9	Trifolium	0.574	0.126668	0.919	Unchanged	DNA replication licensing factor MCM3 (EC 3.6.4.12)	GO:0003677; GO:0004386; GO:0005524; GO:0005634; GO:0006270; GO:0016787; GO:0032508; GO:0042555	DNA duplex unwinding [GO:0032508]; DNA replication initiation [GO:0006270]	MCM complex [GO:0042555]; nucleus [GO:0005634]	ATP binding [GO:0005524]; DNA binding [GO:0003677]; helicase activity [GO:0004386]; hydrolase activity [GO:0016787]	A0A1P8BGQ6	#N/A
A0A2K3KHG7	Trifolium	0.458	0.204546	0.94	Unchanged	Gamma carbonic anhydrase mitochondrial-like	GO:0031966		mitochondrial membrane [GO:0031966]		Q9C6B3	AT1G47260
A0A2K3KHL4	Trifolium	0.756	0.173159	0.933	Unchanged	Cytoplasmic tRNA 2-thiolation protein 1-like protein	GO:0005524; GO:0006400; GO:0016020; GO:0016740	tRNA modification [GO:0006400]	membrane [GO:0016020]	ATP binding [GO:0005524]; transferase activity [GO:0016740]	O64862	AT2G44270
A0A2K3KHM3	Trifolium	1.01	0.103051	0.908	Unchanged	L-gulono-1,4-lactone dehydrogenase-like protein	GO:0016491; GO:0071949			FAD binding [GO:0071949]; oxidoreductase activity [GO:0016491]	O81032	AT2G46760
A0A2K3KHM6	Trifolium	-0.328	0.494277	0.965	Unchanged	Glycerol-3-phosphate dehydrogenase SDP6 mitochondrial-like	GO:0004368; GO:0006072; GO:0009331	glycerol-3-phosphate metabolic process [GO:0006072]	glycerol-3-phosphate dehydrogenase complex [GO:0009331]	glycerol-3-phosphate dehydrogenase (quinone) activity [GO:0004368]	Q9SS48	AT3G10370
A0A2K3KHQ0	Trifolium	0.581	0.233484	0.944	Unchanged	Glucuronokinase G	GO:0016301; GO:0016310	phosphorylation [GO:0016310]		kinase activity [GO:0016301]	Q9LY82	AT5G14470
A0A2K3KHQ5	Trifolium	0.413	0.313294	0.954	Unchanged	Annexin	GO:0005509; GO:0005544; GO:0006950	response to stress [GO:0006950]		calcium ion binding [GO:0005509]; calcium-dependent phospholipid binding [GO:0005544]	Q9C9X3	AT1G68090
A0A2K3KI53	Trifolium	0.116	0.641044	0.97	Unchanged	RNA helicase (EC 3.6.4.13)	GO:0003676; GO:0004386; GO:0005524			ATP binding [GO:0005524]; helicase activity [GO:0004386]; nucleic acid binding [GO:0003676]	Q9LU46	AT5G51280
A0A2K3KI56	Trifolium	-0.878	0.0721433	0.886	Unchanged	Putative NADH dehydrogenase					Q9FLX7	AT5G52840
A0A2K3KIA7	Trifolium	-0.65	0.424742	0.962	Unchanged	Stem-specific protein TSJT1-like					A0A1P8B9Q2	#N/A
A0A2K3KIB9	Trifolium	-0.898	0.0157923	0.716	Down-regulated	UDP-N-acetylglucosamine-dolichyl-phosphate N-acetylglucosaminephosphotransferase-like protein	GO:0003975; GO:0006488; GO:0016020; GO:0016757	dolichol-linked oligosaccharide biosynthetic process [GO:0006488]	membrane [GO:0016020]	glycosyltransferase activity [GO:0016757]; UDP-N-acetylglucosamine-dolichyl-phosphate N-acetylglucosaminephosphotransferase activity [GO:0003975]	O22211	AT2G41490
A0A2K3KIC6	Trifolium	-0.177	0.802781	0.974	Unchanged	Reverse transcriptase Ty1/copia-type domain-containing protein					Q94HW2	#N/A
A0A2K3KIG5	Trifolium	-0.432	0.246836	0.946	Unchanged	Phosphoacetylglucosamine mutase-like protein	GO:0016868; GO:0071704	organic substance metabolic process [GO:0071704]		intramolecular phosphotransferase activity [GO:0016868]	P57750	AT5G18070
A0A2K3KII3	Trifolium	0.808	0.364085	0.958	Unchanged	Serine carboxypeptidase 50-like protein	GO:0004185; GO:0006508	proteolysis [GO:0006508]		serine-type carboxypeptidase activity [GO:0004185]	Q9M9Q6	AT1G15000
A0A2K3KIK0	Trifolium	-0.723	0.0404363	0.836	Down-regulated	Cysteine synthase chloroplastic chromoplastic-like					P47999	AT2G43750
A0A2K3KIL2	Trifolium	-0.514	0.109693	0.912	Unchanged	2-methoxy-6-polyprenyl-1,4-benzoquinol methylase mitochondrial-like	GO:0008168; GO:0032259	methylation [GO:0032259]		methyltransferase activity [GO:0008168]	Q9LVC8	AT5G57300
A0A2K3KIX0	Trifolium	-0.125	0.862218	0.976	Unchanged	1-phosphatidylinositol phosphodiesterase-like protein	GO:0006629; GO:0008081	lipid metabolic process [GO:0006629]		phosphoric diester hydrolase activity [GO:0008081]	Q9SZP6	AT4G38690
A0A2K3KIX4	Trifolium	-1.26	0.0365104	0.826	Down-regulated	Ubiquitin-specific protease family C19 protein	GO:0006508; GO:0008233	proteolysis [GO:0006508]		peptidase activity [GO:0008233]	Q9ZVA7	AT1G78880
A0A2K3KIZ4	Trifolium	0.481	0.390272	0.96	Unchanged	Transcription elongation factor A protein 3-like	GO:0003746; GO:0005634		nucleus [GO:0005634]	translation elongation factor activity [GO:0003746]	Q9ZVH8	AT2G38560
A0A2K3KJA8	Trifolium	-2.23	0.00520295	0.588	Down-regulated	Protein decapping 5-like					Q9C658	AT1G26110
A0A2K3KJC2	Trifolium	-0.995	0.338827	0.956	Unchanged	Ketol-acid reductoisomerase chloroplastic-like	GO:0009082; GO:0016491; GO:0016853	branched-chain amino acid biosynthetic process [GO:0009082]		isomerase activity [GO:0016853]; oxidoreductase activity [GO:0016491]	Q05758	AT3G58610
A0A2K3KJD7	Trifolium	-0.0431	0.962859	0.977	Unchanged	Epoxide hydrolase	GO:0004301			epoxide hydrolase activity [GO:0004301]	Q8GX63	#N/A
A0A2K3KJF4	Trifolium	-0.301	0.532992	0.967	Unchanged	Uncharacterized protein					Q9SZZ6	AT4G25680
A0A2K3KJU0	Trifolium	0.0113	0.967042	0.977	Unchanged	Histone acetyltransferase HAC1-like protein	GO:0016740			transferase activity [GO:0016740]	Q9M898	#N/A
A0A2K3KJV8	Trifolium	-1.13	0.129132	0.92	Unchanged	60S ribosomal protein l3-like	GO:0003735; GO:0005840; GO:0006412; GO:1990904	translation [GO:0006412]	ribonucleoprotein complex [GO:1990904]; ribosome [GO:0005840]	structural constituent of ribosome [GO:0003735]	A8MQQ1	#N/A
A0A2K3KJW0	Trifolium	1.24	0.000109381	0.123	Up-regulated	Elongation factor 1-alpha	GO:0003746; GO:0003924; GO:0005525			GTP binding [GO:0005525]; GTPase activity [GO:0003924]; translation elongation factor activity [GO:0003746]	Q8W4H7	AT5G60390
A0A2K3KJZ0	Trifolium	-1.24	0.00318627	0.518	Down-regulated	Lamin-like protein	GO:0009055			electron transfer activity [GO:0009055]	Q39131	AT5G15350
A0A2K3KK00	Trifolium	0.0317	0.912909	0.976	Unchanged	60S ribosomal protein l39-2-like	GO:0003735; GO:0005840; GO:0006412; GO:1990904	translation [GO:0006412]	ribonucleoprotein complex [GO:1990904]; ribosome [GO:0005840]	structural constituent of ribosome [GO:0003735]	P51424	AT4G31985
A0A2K3KK77	Trifolium	-1.49	0.0571027	0.868	Unchanged	Gamma carbonic anhydrase mitochondrial-like	GO:0005737		cytoplasm [GO:0005737]		Q9C6B3	AT1G47260
A0A2K3KK97	Trifolium	0.212	0.554342	0.967	Unchanged	Phosphomannomutase (EC 5.4.2.8)	GO:0004615; GO:0005737; GO:0009298; GO:0046872	GDP-mannose biosynthetic process [GO:0009298]	cytoplasm [GO:0005737]	metal ion binding [GO:0046872]; phosphomannomutase activity [GO:0004615]	O80840	AT2G45790
A0A2K3KKA4	Trifolium	-0.0999	0.72746	0.973	Unchanged	Monothiol glutaredoxin-S15 mitochondrial-like	GO:0005739; GO:0015036; GO:0046872; GO:0051537		mitochondrion [GO:0005739]	2 iron, 2 sulfur cluster binding [GO:0051537]; disulfide oxidoreductase activity [GO:0015036]; metal ion binding [GO:0046872]	Q8LBK6	AT3G15660
A0A2K3KKN4	Trifolium	-2.57	0.00185696	0.446	Down-regulated	60S ribosomal protein l13a-4-like	GO:0003735; GO:0005840; GO:0006412; GO:1990904	translation [GO:0006412]	ribonucleoprotein complex [GO:1990904]; ribosome [GO:0005840]	structural constituent of ribosome [GO:0003735]	Q9FKC0	AT5G48760
A0A2K3KKT4	Trifolium	-0.454	0.234875	0.945	Unchanged	Glutamyl-tRNA amidotransferase subunit a	GO:0016740			transferase activity [GO:0016740]	Q9LI77	AT3G25660
A0A2K3KKW4	Trifolium	0.816	0.354424	0.957	Unchanged	Monothiol glutaredoxin-S14 chloroplastic-like					Q8H7F6	AT2G38270
A0A2K3KKZ6	Trifolium	0.559	0.187096	0.936	Unchanged	Aminoacylase-1	GO:0005737; GO:0046872		cytoplasm [GO:0005737]	metal ion binding [GO:0046872]	Q8S9L3	AT4G38220
A0A2K3KL23	Trifolium	-1.25	0.179688	0.935	Unchanged	Glutelin type-A	GO:0045735			nutrient reservoir activity [GO:0045735]	Q9LQQ3	AT1G07750
A0A2K3KLB0	Trifolium	-0.0232	0.937735	0.977	Unchanged	RNA helicase (EC 3.6.4.13)	GO:0003676; GO:0004386; GO:0005524			ATP binding [GO:0005524]; helicase activity [GO:0004386]; nucleic acid binding [GO:0003676]	Q9LU46	AT5G51280
A0A2K3KLQ6	Trifolium	0.932	0.0384819	0.831	Up-regulated	Dihydropteroate synthase	GO:0009396; GO:0016740	folic acid-containing compound biosynthetic process [GO:0009396]		transferase activity [GO:0016740]	Q9SZV3	AT4G30000
A0A2K3KM00	Trifolium	-0.0394	0.941611	0.977	Unchanged	protein-serine/threonine phosphatase (EC 3.1.3.16)					O82734	AT5G27840
A0A2K3KMB8	Trifolium	0.164	0.75126	0.973	Unchanged	Pathogenesis-related protein pr10	GO:0004864; GO:0006952; GO:0009607; GO:0009738; GO:0010427; GO:0038023	abscisic acid-activated signaling pathway [GO:0009738]; defense response [GO:0006952]; response to biotic stimulus [GO:0009607]		abscisic acid binding [GO:0010427]; protein phosphatase inhibitor activity [GO:0004864]; signaling receptor activity [GO:0038023]	#N/A	#N/A
A0A2K3KME0	Trifolium	-0.317	0.232962	0.944	Unchanged	DEAD-box ATP-dependent RNA helicase 2-like protein	GO:0003676; GO:0003724; GO:0005524; GO:0016787			ATP binding [GO:0005524]; hydrolase activity [GO:0016787]; nucleic acid binding [GO:0003676]; RNA helicase activity [GO:0003724]	Q94A52	AT3G19760
A0A2K3KMK7	Trifolium	-0.87	0.13409	0.922	Unchanged	Cop9 signalosome complex subunit 5a-like protein	GO:0008180; GO:0008237		COP9 signalosome [GO:0008180]	metallopeptidase activity [GO:0008237]	Q8LAZ7	AT1G22920
A0A2K3KMX8	Trifolium	-1.71	0.00398208	0.548	Down-regulated	26S proteasome non-ATPase regulatory subunit 1-like protein	GO:0000502		proteasome complex [GO:0000502]		Q9MAT0	AT1G04810
A0A2K3KMZ3	Trifolium	-0.648	0.105355	0.909	Unchanged	Putative beta-D-xylosidase 7-like protein	GO:0009044; GO:0045493	xylan catabolic process [GO:0045493]		xylan 1,4-beta-xylosidase activity [GO:0009044]	Q9SGZ5	AT1G78060
A0A2K3KN65	Trifolium	0.0229	0.976947	0.978	Unchanged	phenylalanine ammonia-lyase (EC 4.3.1.24)	GO:0006559; GO:0045548	L-phenylalanine catabolic process [GO:0006559]		phenylalanine ammonia-lyase activity [GO:0045548]	Q9SS45	AT3G10340
A0A2K3KNA1	Trifolium	0.213	0.610056	0.969	Unchanged	Dual-specificity kinase domain protein	GO:0016301; GO:0016310	phosphorylation [GO:0016310]		kinase activity [GO:0016301]	F4HQ88	AT1G73460
A0A2K3KNP0	Trifolium	-3.94	0.14309	0.925	Unchanged	Copia-type polyprotein					Q94HW2	#N/A
A0A2K3KP29	Trifolium	-0.542	0.0994887	0.906	Unchanged	Nuclear pore complex protein	GO:0000055; GO:0000056; GO:0005643; GO:0015031; GO:0017056; GO:0051028	mRNA transport [GO:0051028]; protein transport [GO:0015031]; ribosomal large subunit export from nucleus [GO:0000055]; ribosomal small subunit export from nucleus [GO:0000056]	nuclear pore [GO:0005643]	structural constituent of nuclear pore [GO:0017056]	Q9FFK6	AT5G05680
A0A2K3KP45	Trifolium	0.0459	0.938233	0.977	Unchanged	Disease resistance protein (TIR-NBS-LRR class)	GO:0007165	signal transduction [GO:0007165]			F4IUF0	AT2G20142
A0A2K3KP94	Trifolium	-0.0824	0.803113	0.974	Unchanged	N-alpha-acetyltransferase 15 NatA auxiliary subunit-like protein	GO:0005737; GO:0016740		cytoplasm [GO:0005737]	transferase activity [GO:0016740]	F4HS68	#N/A
A0A2K3KPA4	Trifolium	-2.06	0.0502995	0.857	Unchanged	Uncharacterized protein					Q9SD78	AT5G08060
A0A2K3KPJ5	Trifolium	-2.14	0.00302146	0.512	Down-regulated	Receptor-like protein kinase	GO:0004674; GO:0005524; GO:0016020; GO:0016310	phosphorylation [GO:0016310]	membrane [GO:0016020]	ATP binding [GO:0005524]; protein serine/threonine kinase activity [GO:0004674]	Q9FLW0	AT5G24010
A0A2K3KPP4	Trifolium	-0.827	0.125469	0.919	Unchanged	Ferredoxin-dependent glutamate synthase chloroplastic-like	GO:0016491			oxidoreductase activity [GO:0016491]	Q9ZNZ7	AT5G04140
A0A2K3KPU0	Trifolium	-0.442	0.159684	0.93	Unchanged	Mitochondrial chaperone BCS1	GO:0005524; GO:0016887			ATP binding [GO:0005524]; ATP hydrolysis activity [GO:0016887]	Q9FLD5	AT5G40010
A0A2K3KQ55	Trifolium	-0.662	0.0336319	0.817	Down-regulated	Limonoid UDP-glucosyltransferase-like protein	GO:0016740			transferase activity [GO:0016740]	Q5XF20	AT4G15480
A0A2K3KQG9	Trifolium	0.192	0.383526	0.959	Unchanged	Large ribosomal subunit protein eL28	GO:0003735; GO:0005840; GO:0006412; GO:1990904	translation [GO:0006412]	ribonucleoprotein complex [GO:1990904]; ribosome [GO:0005840]	structural constituent of ribosome [GO:0003735]	O82204	AT2G19730
A0A2K3KQI0	Trifolium	-0.159	0.721944	0.973	Unchanged	ABC transporter C family member 4-like protein	GO:0000166			nucleotide binding [GO:0000166]	Q9LZJ5	AT3G62700
A0A2K3KQQ9	Trifolium	0.405	0.621023	0.97	Unchanged	Uncharacterized protein					Q9LNU4	AT1G20200
A0A2K3KQY3	Trifolium	-0.0291	0.895964	0.976	Unchanged	Stromal 70 kDa heat shock-related protein chloroplastic-like	GO:0005524; GO:0140662			ATP binding [GO:0005524]; ATP-dependent protein folding chaperone [GO:0140662]	Q9STW6	AT4G24280
A0A2K3KR05	Trifolium	-0.136	0.782556	0.974	Unchanged	Isoflavone synthase	GO:0004497; GO:0005506; GO:0016020; GO:0016705; GO:0020037		membrane [GO:0016020]	heme binding [GO:0020037]; iron ion binding [GO:0005506]; monooxygenase activity [GO:0004497]; oxidoreductase activity, acting on paired donors, with incorporation or reduction of molecular oxygen [GO:0016705]	F4JT00	#N/A
A0A2K3KR38	Trifolium	-1.09	0.0792726	0.892	Unchanged	Altered inheritance of mitochondria protein 32-like					Q93Z74	AT3G27570
A0A2K3KR47	Trifolium	0.616	0.213802	0.941	Unchanged	Single-stranded DNA binding protein Ssb-like OB fold domain-containing protein					Q93W05	AT1G10590
A0A2K3KR86	Trifolium	0.948	0.0801614	0.893	Unchanged	Elongation factor Tu	GO:0003746; GO:0005525			GTP binding [GO:0005525]; translation elongation factor activity [GO:0003746]	Q9ZT91	AT4G02930
A0A2K3KR88	Trifolium	0.238	0.462502	0.964	Unchanged	Pentatricopeptide repeat-containing protein mitochondrial-like					Q8VYR5	AT4G35850
A0A2K3KRG4	Trifolium	1.29	0.0154806	0.714	Up-regulated	Copper transport protein atox1-like	GO:0046872; GO:0050896	response to stimulus [GO:0050896]		metal ion binding [GO:0046872]	A0A1I9LNC0	#N/A
A0A2K3KRK9	Trifolium	0.331	0.467659	0.964	Unchanged	Wall-associated receptor kinase 2-like protein	GO:0004674; GO:0005524; GO:0007166; GO:0016310	cell surface receptor signaling pathway [GO:0007166]; phosphorylation [GO:0016310]		ATP binding [GO:0005524]; protein serine/threonine kinase activity [GO:0004674]	Q39191	AT1G21250
A0A2K3KRN4	Trifolium	-0.316	0.260145	0.948	Unchanged	Quinone oxidoreductase-like protein chloroplastic-like	GO:0016628			oxidoreductase activity, acting on the CH-CH group of donors, NAD or NADP as acceptor [GO:0016628]	Q9ZUC1	AT1G23740
A0A2K3KRQ7	Trifolium	-1.04	0.0212982	0.759	Down-regulated	Uncharacterized protein					O22164	AT2G44870
A0A2K3KRR2	Trifolium	0.719	0.0260479	0.786	Up-regulated	Eukaryotic translation initiation factor 3 subunit e-like protein	GO:0003743; GO:0005852		eukaryotic translation initiation factor 3 complex [GO:0005852]	translation initiation factor activity [GO:0003743]	Q9C5Z3	AT3G57290
A0A2K3KRT3	Trifolium	0.776	0.0785763	0.891	Unchanged	Protein TOC75 chloroplastic-like					Q9STE8	AT3G46740
A0A2K3KRZ7	Trifolium	-0.787	0.329676	0.955	Unchanged	Elongation factor 1-delta-like protein	GO:0003746			translation elongation factor activity [GO:0003746]	Q9SI20	AT2G18110
A0A2K3KSE4	Trifolium	-0.165	0.788943	0.974	Unchanged	Fatty acyl-CoA reductase (EC 1.2.1.84)	GO:0006629; GO:0080019; GO:0102965	lipid metabolic process [GO:0006629]		alcohol-forming long-chain fatty acyl-CoA reductase activity [GO:0102965]; alcohol-forming very long-chain fatty acyl-CoA reductase activity [GO:0080019]	Q08891	AT3G11980
A0A2K3KSV8	Trifolium	-0.547	0.302874	0.953	Unchanged	Apoptosis inhibitor 5-like protein					F4IGU7	#N/A
A0A2K3KSX5	Trifolium	-0.126	0.822889	0.975	Unchanged	Glutamine-fructose-6-phosphate aminotransferase	GO:0008483; GO:0097367; GO:1901135	carbohydrate derivative metabolic process [GO:1901135]		carbohydrate derivative binding [GO:0097367]; transaminase activity [GO:0008483]	Q9LIP9	AT3G24090
A0A2K3KTB5	Trifolium	-0.235	0.737766	0.973	Unchanged	Protein TRANPARENT TESTA 12-like	GO:0015297; GO:0016020; GO:0042910		membrane [GO:0016020]	antiporter activity [GO:0015297]; xenobiotic transmembrane transporter activity [GO:0042910]	Q9LVD9	AT3G21690
A0A2K3KTC2	Trifolium	0.585	0.415302	0.961	Unchanged	Vacuolar sorting-associated protein 16	GO:0005737; GO:0006886; GO:0007033	intracellular protein transport [GO:0006886]; vacuole organization [GO:0007033]	cytoplasm [GO:0005737]		Q93VQ0	AT2G38020
A0A2K3KTM5	Trifolium	0.717	0.135472	0.922	Unchanged	Root border cell-specific protein	GO:0009507; GO:0020037; GO:0042167; GO:0042803	heme catabolic process [GO:0042167]	chloroplast [GO:0009507]	heme binding [GO:0020037]; protein homodimerization activity [GO:0042803]	Q8LDU1	AT3G03890
A0A2K3KU15	Trifolium	-0.677	0.0334403	0.816	Down-regulated	Ubiquitin-40S ribosomal protein S27a-like	GO:0003729; GO:0003735; GO:0005634; GO:0005737; GO:0005840; GO:0006412; GO:0046872	translation [GO:0006412]	cytoplasm [GO:0005737]; nucleus [GO:0005634]; ribosome [GO:0005840]	metal ion binding [GO:0046872]; mRNA binding [GO:0003729]; structural constituent of ribosome [GO:0003735]	P59232	AT2G47110
A0A2K3KUL2	Trifolium	0.336	0.315274	0.954	Unchanged	Splicing factor 3B subunit 1-like protein	GO:0000245; GO:0003729; GO:0005681; GO:0016020	spliceosomal complex assembly [GO:0000245]	membrane [GO:0016020]; spliceosomal complex [GO:0005681]	mRNA binding [GO:0003729]	Q9FMF9	AT5G64270
A0A2K3KUS4	Trifolium	0.497	0.341115	0.956	Unchanged	Glucose-6-phosphate 1-epimerase-like protein	GO:0003824; GO:0005975; GO:0030246	carbohydrate metabolic process [GO:0005975]		carbohydrate binding [GO:0030246]; catalytic activity [GO:0003824]	Q9LVC5	AT5G57330
A0A2K3KUT7	Trifolium	-0.377	0.623924	0.97	Unchanged	peroxidase (EC 1.11.1.7)	GO:0006979; GO:0020037; GO:0046872; GO:0140825	response to oxidative stress [GO:0006979]		heme binding [GO:0020037]; lactoperoxidase activity [GO:0140825]; metal ion binding [GO:0046872]	Q9M9Q9	AT1G14550
A0A2K3KUU8	Trifolium	-1.18	0.0627186	0.875	Unchanged	Putative polygalacturonase-like protein					Q9FPJ2	AT3G62110
A0A2K3KV41	Trifolium	0.292	0.64837	0.971	Unchanged	Glutelin type-A					Q9LQQ3	AT1G07750
A0A2K3KV55	Trifolium	-0.467	0.214454	0.941	Unchanged	26S protease regulatory subunit 7-like protein	GO:0005737; GO:0006508; GO:0008233	proteolysis [GO:0006508]	cytoplasm [GO:0005737]	peptidase activity [GO:0008233]	Q9SSB5	AT1G53750
A0A2K3KVE8	Trifolium	-0.135	0.884493	0.976	Unchanged	Serine/arginine-rich splicing factor 2	GO:0003723; GO:0006397; GO:0016607	mRNA processing [GO:0006397]	nuclear speck [GO:0016607]	RNA binding [GO:0003723]	Q9FMG4	AT5G64200
A0A2K3KVG5	Trifolium	0.288	0.307973	0.953	Unchanged	ER membrane protein complex subunit 4	GO:0005789		endoplasmic reticulum membrane [GO:0005789]		A8MQD8	AT5G10780
A0A2K3KVH9	Trifolium	-0.856	0.209901	0.941	Unchanged	Uncharacterized protein					Q8L7E5	AT5G11390
A0A2K3KVJ9	Trifolium	-0.0809	0.875573	0.976	Unchanged	2-amino-4-hydroxy-6-hydroxymethyldihydropteridine diphosphokinase (EC 2.7.6.3)	GO:0003848; GO:0004156; GO:0005524; GO:0016301; GO:0016310; GO:0046654; GO:0046656	folic acid biosynthetic process [GO:0046656]; phosphorylation [GO:0016310]; tetrahydrofolate biosynthetic process [GO:0046654]		2-amino-4-hydroxy-6-hydroxymethyldihydropteridine diphosphokinase activity [GO:0003848]; ATP binding [GO:0005524]; dihydropteroate synthase activity [GO:0004156]; kinase activity [GO:0016301]	Q9SZV3	AT4G30000
A0A2K3KVX5	Trifolium	0.0857	0.806163	0.974	Unchanged	Rapid alkalinization factor-like protein	GO:0005576		extracellular region [GO:0005576]		Q8L9P8	AT4G15800
A0A2K3KVY5	Trifolium	-1.09	0.012895	0.689	Down-regulated	Peptidyl-prolyl cis-trans isomerase	GO:0016020; GO:0016853		membrane [GO:0016020]	isomerase activity [GO:0016853]	Q93ZN3	AT4G17070
A0A2K3KW29	Trifolium	-0.126	0.862047	0.976	Unchanged	Aldehyde dehydrogenase family 2 member c4-like protein	GO:0016620			oxidoreductase activity, acting on the aldehyde or oxo group of donors, NAD or NADP as acceptor [GO:0016620]	Q56YU0	AT3G24503
A0A2K3KWJ9	Trifolium	0.112	0.754025	0.973	Unchanged	60S ribosomal protein l21-1-like	GO:0003735; GO:0005840; GO:0006412	translation [GO:0006412]	ribosome [GO:0005840]	structural constituent of ribosome [GO:0003735]	Q43291	AT1G09690
A0A2K3KWS5	Trifolium	0.629	0.00602438	0.608	Up-regulated	Transcription initiation factor IIB-like protein	GO:0003743; GO:0070897	transcription preinitiation complex assembly [GO:0070897]		translation initiation factor activity [GO:0003743]	Q9SS44	AT3G10330
A0A2K3KWV3	Trifolium	0.516	0.23033	0.944	Unchanged	Translation initiation factor IF-2-like protein	GO:0003743; GO:0003924; GO:0005525; GO:0009507		chloroplast [GO:0009507]	GTP binding [GO:0005525]; GTPase activity [GO:0003924]; translation initiation factor activity [GO:0003743]	A0A1P8B933	#N/A
A0A2K3KWW4	Trifolium	0.815	0.0901723	0.9	Unchanged	40S ribosomal protein s19-1-like	GO:0003735; GO:0005840; GO:0006412; GO:0008757; GO:1990904	translation [GO:0006412]	ribonucleoprotein complex [GO:1990904]; ribosome [GO:0005840]	S-adenosylmethionine-dependent methyltransferase activity [GO:0008757]; structural constituent of ribosome [GO:0003735]	Q9SGA6	AT3G02080
A0A2K3KWX5	Trifolium	0.23	0.688854	0.972	Unchanged	MLP-like protein 28-like	GO:0006952	defense response [GO:0006952]			Q9SSK5	AT1G70890
A0A2K3KXJ0	Trifolium	-0.079	0.748735	0.973	Unchanged	Cytochrome c oxidase assembly protein cox15-like protein	GO:0006784; GO:0016020; GO:0016653	heme A biosynthetic process [GO:0006784]	membrane [GO:0016020]	oxidoreductase activity, acting on NAD(P)H, heme protein as acceptor [GO:0016653]	Q9FKT8	AT5G56090
A0A2K3KXK1	Trifolium	-0.341	0.633623	0.97	Unchanged	Xyloglucan endotransglucosylase/hydrolase	GO:0004553; GO:0016762; GO:0044042; GO:0048046	glucan metabolic process [GO:0044042]	apoplast [GO:0048046]	hydrolase activity, hydrolyzing O-glycosyl compounds [GO:0004553]; xyloglucan:xyloglucosyl transferase activity [GO:0016762]	Q38857	AT5G57560
A0A2K3KXQ0	Trifolium	0.304	0.385623	0.959	Unchanged	Prolycopene isomerase chloroplastic-like	GO:0009507; GO:0016020; GO:0016116; GO:0016853	carotenoid metabolic process [GO:0016116]	chloroplast [GO:0009507]; membrane [GO:0016020]	isomerase activity [GO:0016853]	A0A1P8ATA5	#N/A
A0A2K3KXQ5	Trifolium	-1.58	0.0168339	0.724	Down-regulated	UOS1					Q8VYA4	#N/A
A0A2K3KXQ9	Trifolium	-0.185	0.70431	0.972	Unchanged	KRR-R motif-containing protein 1	GO:0003723; GO:0005730; GO:0006364; GO:1990904	rRNA processing [GO:0006364]	nucleolus [GO:0005730]; ribonucleoprotein complex [GO:1990904]	RNA binding [GO:0003723]	Q9FT93	AT5G08420
A0A2K3KXS5	Trifolium	0.824	0.0476173	0.852	Up-regulated	Signal peptidase complex catalytic subunit SEC11 (EC 3.4.21.89) (Signal peptidase complex catalytic subunit sec11)	GO:0004252; GO:0005789; GO:0006465	signal peptide processing [GO:0006465]	endoplasmic reticulum membrane [GO:0005789]	serine-type endopeptidase activity [GO:0004252]	Q9SSR2	AT1G52600
A0A2K3KXS6	Trifolium	-0.441	0.304792	0.953	Unchanged	Linoleate 13s-lipoxygenase 3-1 chloroplastic-like	GO:0016702; GO:0034440; GO:0046872	lipid oxidation [GO:0034440]		metal ion binding [GO:0046872]; oxidoreductase activity, acting on single donors with incorporation of molecular oxygen, incorporation of two atoms of oxygen [GO:0016702]	Q9LNR3	AT1G17420
A0A2K3KXT2	Trifolium	1.11	0.0073355	0.632	Up-regulated	Serine/threonine protein phosphatase 2A 57 kDa regulatory subunit B beta-like protein	GO:0000159; GO:0007165; GO:0019888	signal transduction [GO:0007165]	protein phosphatase type 2A complex [GO:0000159]	protein phosphatase regulator activity [GO:0019888]	O04376	AT3G09880
A0A2K3KXW1	Trifolium	-1.56	0.0370131	0.827	Down-regulated	Protein DJ-1 D-like					Q9M8R4	AT3G02720
A0A2K3KXW7	Trifolium	-0.773	0.138848	0.924	Unchanged	Phosphoglycolate phosphatase-like protein	GO:0016791			phosphatase activity [GO:0016791]	P0DKC4	AT5G36790
A0A2K3KXX0	Trifolium	-0.737	0.0318643	0.811	Down-regulated	Aldose 1-epimerase-like protein	GO:0016853; GO:0019318; GO:0030246	hexose metabolic process [GO:0019318]		carbohydrate binding [GO:0030246]; isomerase activity [GO:0016853]	Q9LVH6	AT3G17940
A0A2K3KXX5	Trifolium	-0.0848	0.822617	0.975	Unchanged	Isocitrate lyase and phosphorylmutase	GO:0004451; GO:0005737		cytoplasm [GO:0005737]	isocitrate lyase activity [GO:0004451]	F4IQ75	AT2G43180
A0A2K3KXY0	Trifolium	0.62	0.120016	0.916	Unchanged	NADPH-cytochrome P450 reductase-like protein	GO:0016491			oxidoreductase activity [GO:0016491]	Q9SB48	AT4G24520
A0A2K3KXY1	Trifolium	0.272	0.681303	0.971	Unchanged	Osmotin-like protein OSM34	GO:0050832	defense response to fungus [GO:0050832]			P50700	AT4G11650
A0A2K3KY04	Trifolium	-1.17	0.00936728	0.658	Down-regulated	aldehyde dehydrogenase (NAD(+)) (EC 1.2.1.3)	GO:0004029; GO:0043878			aldehyde dehydrogenase (NAD+) activity [GO:0004029]; glyceraldehyde-3-phosphate dehydrogenase (NAD+) (non-phosphorylating) activity [GO:0043878]	Q9SYG7	AT1G54100
A0A2K3KY05	Trifolium	-0.489	0.136769	0.923	Unchanged	Respiratory burst oxidase-like protein	GO:0016020; GO:0016491		membrane [GO:0016020]	oxidoreductase activity [GO:0016491]	O81210	AT5G51060
A0A2K3KY08	Trifolium	-0.041	0.845096	0.975	Unchanged	Mitochondrial outer membrane protein porin	GO:0005741; GO:0008308		mitochondrial outer membrane [GO:0005741]	voltage-gated monoatomic anion channel activity [GO:0008308]	Q9SRH5	AT3G01280
A0A2K3KY25	Trifolium	-0.816	0.190722	0.937	Unchanged	Late embryogenesis abundant protein	GO:0016020; GO:0098542	defense response to other organism [GO:0098542]	membrane [GO:0016020]		Q9SJ52	AT2G35980
A0A2K3KY38	Trifolium	-0.122	0.628769	0.97	Unchanged	GDP-mannose-dependent alpha-mannosyltransferase	GO:0016757; GO:1901576	organic substance biosynthetic process [GO:1901576]		glycosyltransferase activity [GO:0016757]	Q8S4F6	AT5G01220
A0A2K3KY43	Trifolium	-0.931	0.235588	0.945	Unchanged	HMG-Y-related protein A	GO:0000786; GO:0003677; GO:0005634; GO:0006334; GO:0006355; GO:0008757	nucleosome assembly [GO:0006334]; regulation of DNA-templated transcription [GO:0006355]	nucleosome [GO:0000786]; nucleus [GO:0005634]	DNA binding [GO:0003677]; S-adenosylmethionine-dependent methyltransferase activity [GO:0008757]	Q43386	AT1G14900
A0A2K3KY54	Trifolium	0.104	0.686301	0.972	Unchanged	Ketose-bisphosphate aldolase class-II family protein	GO:0005975; GO:0008270; GO:0016832	carbohydrate metabolic process [GO:0005975]		aldehyde-lyase activity [GO:0016832]; zinc ion binding [GO:0008270]	Q8VYC5	#N/A
A0A2K3KY55	Trifolium	0.465	0.030529	0.806	Unchanged	26S proteasome non-ATPase regulatory subunit 1-like protein	GO:0000502		proteasome complex [GO:0000502]		O48844	AT2G32730
A0A2K3KY74	Trifolium	0.245	0.476643	0.964	Unchanged	Peroxisomal biogenesis factor 11 family protein	GO:0005778; GO:0016559; GO:0042802; GO:0044375	peroxisome fission [GO:0016559]; regulation of peroxisome size [GO:0044375]	peroxisomal membrane [GO:0005778]	identical protein binding [GO:0042802]	Q9LQ73	AT1G01820
A0A2K3KY77	Trifolium	0.272	0.654762	0.971	Unchanged	U-box domain-containing protein (EC 2.3.2.27) (RING-type E3 ubiquitin transferase PUB)	GO:0016567; GO:0061630	protein ubiquitination [GO:0016567]		ubiquitin protein ligase activity [GO:0061630]	Q9C8D1	AT1G66160
A0A2K3KYA8	Trifolium	0.431	0.35064	0.957	Unchanged	Cleavage and polyadenylation specificity factor subunit 5	GO:0003729; GO:0005737; GO:0005849; GO:0006378	mRNA polyadenylation [GO:0006378]	cytoplasm [GO:0005737]; mRNA cleavage factor complex [GO:0005849]	mRNA binding [GO:0003729]	Q8GXS3	AT4G25550
A0A2K3KYB1	Trifolium	0.162	0.684553	0.972	Unchanged	Peroxidase (EC 1.11.1.7)	GO:0005576; GO:0006979; GO:0020037; GO:0042744; GO:0046872; GO:0140825	hydrogen peroxide catabolic process [GO:0042744]; response to oxidative stress [GO:0006979]	extracellular region [GO:0005576]	heme binding [GO:0020037]; lactoperoxidase activity [GO:0140825]; metal ion binding [GO:0046872]	O80822	AT2G41480
A0A2K3KYC1	Trifolium	0.162	0.550992	0.967	Unchanged	Flavonol synthase/flavanone 3-hydroxylase	GO:0016491; GO:0046872			metal ion binding [GO:0046872]; oxidoreductase activity [GO:0016491]	Q9C936	#N/A
A0A2K3KYC7	Trifolium	-0.344	0.399999	0.96	Unchanged	Patellin-5	GO:0007049; GO:0008289; GO:0051301	cell cycle [GO:0007049]; cell division [GO:0051301]		lipid binding [GO:0008289]	A0A1P8B4R9	#N/A
A0A2K3KYD5	Trifolium	-0.309	0.554679	0.967	Unchanged	Putative abscisic acid receptor PYL4-like protein	GO:0004864; GO:0005737; GO:0005886; GO:0009738	abscisic acid-activated signaling pathway [GO:0009738]	cytoplasm [GO:0005737]; plasma membrane [GO:0005886]	protein phosphatase inhibitor activity [GO:0004864]	Q8S8E3	AT2G40330
A0A2K3KYE3	Trifolium	0.304	0.22085	0.943	Unchanged	Aspartyl aminopeptidase	GO:0004177; GO:0006508; GO:0008237; GO:0008270	proteolysis [GO:0006508]		aminopeptidase activity [GO:0004177]; metallopeptidase activity [GO:0008237]; zinc ion binding [GO:0008270]	Q9LST0	AT5G60160
A0A2K3KYE7	Trifolium	-0.162	0.745898	0.973	Unchanged	Calcineurin subunit b-like protein	GO:0005509			calcium ion binding [GO:0005509]	Q9LS47	AT3G18430
A0A2K3KYF2	Trifolium	-2.21	0.0985917	0.906	Unchanged	Retrotransposon-related protein	GO:0003676; GO:0015074	DNA integration [GO:0015074]		nucleic acid binding [GO:0003676]	P92523	#N/A
A0A2K3KYI7	Trifolium	-0.102	0.767413	0.974	Unchanged	Bah and coiled-coil domain-containing protein 1-like	GO:0003682; GO:0046872			chromatin binding [GO:0003682]; metal ion binding [GO:0046872]	F4JL28	AT4G22140
A0A2K3KYI8	Trifolium	0.392	0.438231	0.962	Unchanged	alpha-amylase (EC 3.2.1.1) (1,4-alpha-D-glucan glucanohydrolase)	GO:0004556; GO:0005509; GO:0005975	carbohydrate metabolic process [GO:0005975]		alpha-amylase activity [GO:0004556]; calcium ion binding [GO:0005509]	Q94A41	AT1G69830
A0A2K3KYI9	Trifolium	0.0989	0.695805	0.972	Unchanged	Peptidyl-prolyl cis-trans isomerase pasticcino1-like protein	GO:0016853			isomerase activity [GO:0016853]	Q7DMA9	AT3G54010
A0A2K3KYJ7	Trifolium	-1.07	0.00260494	0.494	Down-regulated	tRNA (Guanine(10)-N2)-methyltransferase	GO:0003723; GO:0008033; GO:0008168; GO:0009451; GO:0032259	methylation [GO:0032259]; RNA modification [GO:0009451]; tRNA processing [GO:0008033]		methyltransferase activity [GO:0008168]; RNA binding [GO:0003723]	Q9LIN4	AT3G26410
A0A2K3KYK4	Trifolium	-0.439	0.405464	0.96	Unchanged	V-type proton ATPase subunit G	GO:0016471; GO:0046961		vacuolar proton-transporting V-type ATPase complex [GO:0016471]	proton-transporting ATPase activity, rotational mechanism [GO:0046961]	O82628	AT3G01390
A0A2K3KYL9	Trifolium	0.109	0.63726	0.97	Unchanged	Putative cytosolic iron-sulfur assembly protein					O80990	AT2G26060
A0A2K3KYM0	Trifolium	0.61	0.0411212	0.838	Up-regulated	Nucleoside diphosphate kinase (EC 2.7.4.6)	GO:0004550; GO:0005524; GO:0006183; GO:0006228; GO:0006241; GO:0016310; GO:0046872	CTP biosynthetic process [GO:0006241]; GTP biosynthetic process [GO:0006183]; phosphorylation [GO:0016310]; UTP biosynthetic process [GO:0006228]		ATP binding [GO:0005524]; metal ion binding [GO:0046872]; nucleoside diphosphate kinase activity [GO:0004550]	P39207	AT4G09320
A0A2K3KYM5	Trifolium	-0.497	0.307433	0.953	Unchanged	DNA (Cytosine-5)-methyltransferase	GO:0005634; GO:0008168; GO:0032259	methylation [GO:0032259]	nucleus [GO:0005634]	methyltransferase activity [GO:0008168]	O23273	AT4G14140
A0A2K3KYP0	Trifolium	1.07	0.114244	0.914	Unchanged	NAD-dependent epimerase/dehydratase family protein					Q8H124	AT2G34460
A0A2K3KYP1	Trifolium	-0.218	0.246706	0.946	Unchanged	ATP-dependent zinc metalloprotease ftsh mitochondrial-like	GO:0004176; GO:0004222; GO:0005524; GO:0005737; GO:0006508; GO:0008270; GO:0016020; GO:0016887; GO:0043231	proteolysis [GO:0006508]	cytoplasm [GO:0005737]; intracellular membrane-bounded organelle [GO:0043231]; membrane [GO:0016020]	ATP binding [GO:0005524]; ATP hydrolysis activity [GO:0016887]; ATP-dependent peptidase activity [GO:0004176]; metalloendopeptidase activity [GO:0004222]; zinc ion binding [GO:0008270]	Q8VZI8	AT1G07510
A0A2K3KYP4	Trifolium	-0.0855	0.736812	0.973	Unchanged	Eukaryotic translation initiation factor 4b-like protein	GO:0003743			translation initiation factor activity [GO:0003743]	Q9SZP8	AT4G38710
A0A2K3KYQ8	Trifolium	2.23	0.00395196	0.547	Up-regulated	E3 ubiquitin-protein ligase ring1-like protein	GO:0046872; GO:0061630			metal ion binding [GO:0046872]; ubiquitin protein ligase activity [GO:0061630]	O22197	AT2G40830
A0A2K3KYQ9	Trifolium	-0.677	0.212404	0.941	Unchanged	Putative rRNA-processing protein EBP2	GO:0005730; GO:0042254	ribosome biogenesis [GO:0042254]	nucleolus [GO:0005730]		Q9LUJ5	AT3G22660
A0A2K3KYR1	Trifolium	-0.425	0.378957	0.959	Unchanged	Putative cysteine-rich RLK (Receptor-like kinase) protein	GO:0016301; GO:0016310	phosphorylation [GO:0016310]		kinase activity [GO:0016301]	C0LGN2	AT3G14840
A0A2K3KYR3	Trifolium	0.182	0.723026	0.973	Unchanged	DEAD-box ATP-dependent RNA helicase chloroplastic-like	GO:0003676; GO:0004386; GO:0005524; GO:0008270; GO:0044238	primary metabolic process [GO:0044238]		ATP binding [GO:0005524]; helicase activity [GO:0004386]; nucleic acid binding [GO:0003676]; zinc ion binding [GO:0008270]	F4K180	#N/A
A0A2K3KYS6	Trifolium	-0.337	0.478952	0.964	Unchanged	Protein RRP5	GO:0003676; GO:0005634; GO:0006364	rRNA processing [GO:0006364]	nucleus [GO:0005634]	nucleic acid binding [GO:0003676]	F4J8K6	AT3G11964
A0A2K3KYS8	Trifolium	-0.926	0.174268	0.934	Unchanged	SKP1-like protein	GO:0005634; GO:0006511; GO:0009867; GO:0016567	jasmonic acid mediated signaling pathway [GO:0009867]; protein ubiquitination [GO:0016567]; ubiquitin-dependent protein catabolic process [GO:0006511]	nucleus [GO:0005634]		Q39255	AT1G75950
A0A2K3KYT9	Trifolium	0.0429	0.918332	0.977	Unchanged	Nascent polypeptide-associated complex subunit beta					Q9SMW7	AT1G17880
A0A2K3KYU2	Trifolium	-0.283	0.765686	0.974	Unchanged	Partner of Y14 and mago	GO:0005654; GO:0005730; GO:0005737; GO:0010628; GO:1903259	exon-exon junction complex disassembly [GO:1903259]; positive regulation of gene expression [GO:0010628]	cytoplasm [GO:0005737]; nucleolus [GO:0005730]; nucleoplasm [GO:0005654]		Q9LPZ4	AT1G11400
A0A2K3KYY4	Trifolium	0.0535	0.7825	0.974	Unchanged	Eukaryotic peptide chain release factor GTP-binding subunit erf3a-like protein	GO:0003924; GO:0005525			GTP binding [GO:0005525]; GTPase activity [GO:0003924]	Q8L835	#N/A
A0A2K3KYY6	Trifolium	-0.103	0.7624	0.973	Unchanged	60S ribosomal protein l30-like	GO:0003723; GO:0003735; GO:0022625		cytosolic large ribosomal subunit [GO:0022625]	RNA binding [GO:0003723]; structural constituent of ribosome [GO:0003735]	Q9C8F7	AT1G36240
A0A2K3KYY8	Trifolium	-0.388	0.276075	0.95	Unchanged	Zinc-metallopeptidase peroxisomal-like	GO:0046872			metal ion binding [GO:0046872]	O22941	AT2G41790
A0A2K3KYZ9	Trifolium	0.279	0.635085	0.97	Unchanged	Omega-hydroxypalmitate O-feruloyl transferase-like protein	GO:0016740			transferase activity [GO:0016740]	F4JWW6	#N/A
A0A2K3KZ02	Trifolium	0.273	0.250242	0.947	Unchanged	Histone H2A	GO:0000786; GO:0003677; GO:0005634; GO:0030527; GO:0046982		nucleosome [GO:0000786]; nucleus [GO:0005634]	DNA binding [GO:0003677]; protein heterodimerization activity [GO:0046982]; structural constituent of chromatin [GO:0030527]	Q9S9K7	AT1G54690
A0A2K3KZ06	Trifolium	-0.0135	0.961821	0.977	Unchanged	Plant synaptotagmin	GO:0005737; GO:0006869; GO:0008289; GO:0012505; GO:0016020; GO:0043229	lipid transport [GO:0006869]	cytoplasm [GO:0005737]; endomembrane system [GO:0012505]; intracellular organelle [GO:0043229]; membrane [GO:0016020]	lipid binding [GO:0008289]	B6ETT4	AT1G20080
A0A2K3KZ38	Trifolium	0.0283	0.944408	0.977	Unchanged	imidazole glycerol-phosphate synthase (EC 4.3.2.10)	GO:0000105; GO:0000107; GO:0016829	histidine biosynthetic process [GO:0000105]		imidazoleglycerol-phosphate synthase activity [GO:0000107]; lyase activity [GO:0016829]	Q9SZ30	AT4G26900
A0A2K3KZ54	Trifolium	1.23	0.0956205	0.904	Unchanged	peptidylprolyl isomerase (EC 5.2.1.8)	GO:0003755			peptidyl-prolyl cis-trans isomerase activity [GO:0003755]	Q7DMA9	AT3G54010
A0A2K3KZ63	Trifolium	1.24	0.0446513	0.846	Up-regulated	DDE Tnp4 domain-containing protein	GO:0004518; GO:0005634; GO:0046872		nucleus [GO:0005634]	metal ion binding [GO:0046872]; nuclease activity [GO:0004518]	Q9M2U3	AT3G55350
A0A2K3KZ68	Trifolium	0.154	0.782126	0.974	Unchanged	Myb/SANT-like DNA-binding domain-containing protein					Q9LMN5	AT1G21200
A0A2K3KZ73	Trifolium	-1.45	0.0127979	0.688	Down-regulated	4-coumarate-CoA ligase 9-like protein	GO:0016874			ligase activity [GO:0016874]	Q84P23	AT5G63380
A0A2K3KZ87	Trifolium	-0.0499	0.935372	0.977	Unchanged	Cyclin-dependent kinase	GO:0004674; GO:0005524; GO:0016310	phosphorylation [GO:0016310]		ATP binding [GO:0005524]; protein serine/threonine kinase activity [GO:0004674]	O80345	AT4G28980
A0A2K3KZ89	Trifolium	0.328	0.0727201	0.886	Unchanged	Transmembrane emp24 domain-containing protein p24beta3-like	GO:0016020		membrane [GO:0016020]		Q9LIL4	AT3G22845
A0A2K3KZ91	Trifolium	-1.54	0.00131192	0.389	Down-regulated	Mitochondrial inner membrane protease subunit 2	GO:0004252; GO:0006465; GO:0006627; GO:0042720	protein processing involved in protein targeting to mitochondrion [GO:0006627]; signal peptide processing [GO:0006465]	mitochondrial inner membrane peptidase complex [GO:0042720]	serine-type endopeptidase activity [GO:0004252]	Q9S724	AT3G08980
A0A2K3KZ92	Trifolium	-0.667	0.0185446	0.738	Down-regulated	ABC transporter F family member 3-like protein	GO:0005524; GO:0016887; GO:0042742	defense response to bacterium [GO:0042742]		ATP binding [GO:0005524]; ATP hydrolysis activity [GO:0016887]	Q8H0V6	AT1G64550
A0A2K3KZC0	Trifolium	-0.84	0.107487	0.911	Unchanged	Protein CW7					F4ICZ9	AT1G59520
A0A2K3KZC8	Trifolium	-0.4	0.430577	0.962	Unchanged	non-reducing end alpha-L-arabinofuranosidase (EC 3.2.1.55)	GO:0046373; GO:0046556	L-arabinose metabolic process [GO:0046373]		alpha-L-arabinofuranosidase activity [GO:0046556]	Q9SG80	AT3G10740
A0A2K3KZD1	Trifolium	0.841	0.0503988	0.857	Unchanged	Putative importin-7	GO:0006886; GO:0031267	intracellular protein transport [GO:0006886]		small GTPase binding [GO:0031267]	F4IRR2	AT2G31660
A0A2K3KZD9	Trifolium	-0.277	0.614747	0.97	Unchanged	26S proteasome non-ATPase regulatory subunit 12-like protein	GO:0000502		proteasome complex [GO:0000502]		F4KFD7	#N/A
A0A2K3KZE7	Trifolium	0.196	0.546981	0.967	Unchanged	Diacylglycerol kinase a-like protein	GO:0004143; GO:0007165; GO:0016310	phosphorylation [GO:0016310]; signal transduction [GO:0007165]		ATP-dependent diacylglycerol kinase activity [GO:0004143]	Q8VZG1	AT2G18730
A0A2K3KZE8	Trifolium	0.668	0.0212379	0.758	Up-regulated	Transcription initiation factor IIB-like protein	GO:0003743; GO:0017025; GO:0070897	transcription preinitiation complex assembly [GO:0070897]		TBP-class protein binding [GO:0017025]; translation initiation factor activity [GO:0003743]	Q9SS44	AT3G10330
A0A2K3KZF0	Trifolium	-0.915	0.155806	0.929	Unchanged	Phenylalanine ammonia-lyase (EC 4.3.1.24)	GO:0005737; GO:0006559; GO:0009800; GO:0045548	cinnamic acid biosynthetic process [GO:0009800]; L-phenylalanine catabolic process [GO:0006559]	cytoplasm [GO:0005737]	phenylalanine ammonia-lyase activity [GO:0045548]	P35510	AT2G37040
A0A2K3KZF3	Trifolium	0.455	0.18506	0.936	Unchanged	Exocyst complex component Sec8	GO:0000145; GO:0006612; GO:0006893; GO:0015031; GO:0090522	Golgi to plasma membrane transport [GO:0006893]; protein targeting to membrane [GO:0006612]; protein transport [GO:0015031]; vesicle tethering involved in exocytosis [GO:0090522]	exocyst [GO:0000145]		A0A1I9LSY6	#N/A
A0A2K3KZF7	Trifolium	0.698	0.0200263	0.75	Up-regulated	Serine/threonine protein phosphatase 5-like protein	GO:0016787; GO:0046872			hydrolase activity [GO:0016787]; metal ion binding [GO:0046872]	A0A1P8AY87	#N/A
A0A2K3KZG1	Trifolium	-0.7	0.135571	0.922	Unchanged	Feruloyl esterase a	GO:0004806; GO:0006629	lipid metabolic process [GO:0006629]		triglyceride lipase activity [GO:0004806]	F4K4J2	#N/A
A0A2K3KZG7	Trifolium	-0.59	0.176212	0.934	Unchanged	Random slug protein 5-like					Q9LM14	AT1G22180
A0A2K3KZG9	Trifolium	0.327	0.279532	0.95	Unchanged	Exocyst complex component Sec8	GO:0000145; GO:0006612; GO:0006893; GO:0006904; GO:0015031; GO:0090522	Golgi to plasma membrane transport [GO:0006893]; protein targeting to membrane [GO:0006612]; protein transport [GO:0015031]; vesicle docking involved in exocytosis [GO:0006904]; vesicle tethering involved in exocytosis [GO:0090522]	exocyst [GO:0000145]		A0A1I9LSY6	#N/A
A0A2K3KZH2	Trifolium	-0.18	0.421317	0.961	Unchanged	Protein NLRC3-like					Q93ZV8	AT1G10510
A0A2K3KZJ9	Trifolium	-1.15	0.0341531	0.819	Down-regulated	PPM-type phosphatase domain-containing protein	GO:0004722			protein serine/threonine phosphatase activity [GO:0004722]	Q94AT1	AT5G53140
A0A2K3KZK3	Trifolium	-0.334	0.543863	0.967	Unchanged	aminocyclopropanecarboxylate oxidase (EC 1.14.17.4) (Ethylene-forming enzyme)	GO:0016491; GO:0046872			metal ion binding [GO:0046872]; oxidoreductase activity [GO:0016491]	Q06588	AT1G05010
A0A2K3KZL0	Trifolium	-0.507	0.473039	0.964	Unchanged	Bifunctional aspartate aminotransferase and glutamate/aspartate-prephenate aminotransferase-like protein	GO:0008483; GO:0009058; GO:0030170	biosynthetic process [GO:0009058]		pyridoxal phosphate binding [GO:0030170]; transaminase activity [GO:0008483]	Q9SIE1	AT2G22250
A0A2K3KZL2	Trifolium	0.102	0.711793	0.972	Unchanged	Putative bifunctional methylthioribulose-1-phosphate dehydratase/enolase-phosphatase e1-like protein	GO:0005737; GO:0016829; GO:0019509; GO:0046872	L-methionine salvage from methylthioadenosine [GO:0019509]	cytoplasm [GO:0005737]	lyase activity [GO:0016829]; metal ion binding [GO:0046872]	F4JYQ5	#N/A
A0A2K3KZM3	Trifolium	-0.0866	0.803188	0.974	Unchanged	26S proteasome non-ATPase regulatory subunit 4-like protein	GO:0000502		proteasome complex [GO:0000502]		P55034	AT4G38630
A0A2K3KZN5	Trifolium	1.77	0.025376	0.783	Up-regulated	1-aminocyclopropane-1-carboxylate oxidase 1-like protein	GO:0046872			metal ion binding [GO:0046872]	P93821	AT1G04380
A0A2K3KZP3	Trifolium	0.622	0.141314	0.924	Unchanged	NAD(P)H dehydrogenase (quinone) (EC 1.6.5.2)	GO:0003955			NAD(P)H dehydrogenase (quinone) activity [GO:0003955]	Q9LK88	AT3G27890
A0A2K3KZP6	Trifolium	0.466	0.283252	0.951	Unchanged	Sister-chromatide cohesion protein					O82265	AT2G47980
A0A2K3KZP7	Trifolium	-3.37	0.00110414	0.361	Down-regulated	Fumarylacetoacetase (EC 3.7.1.2) (Fumarylacetoacetate hydrolase)	GO:0004334; GO:0006559; GO:0006572; GO:0046872	L-phenylalanine catabolic process [GO:0006559]; tyrosine catabolic process [GO:0006572]		fumarylacetoacetase activity [GO:0004334]; metal ion binding [GO:0046872]	Q8RW90	AT1G12050
A0A2K3KZP9	Trifolium	-0.0061	0.976731	0.978	Unchanged	50S ribosomal protein l3-2 chloroplastic-like	GO:0003735; GO:0005840; GO:0006412; GO:1990904	translation [GO:0006412]	ribonucleoprotein complex [GO:1990904]; ribosome [GO:0005840]	structural constituent of ribosome [GO:0003735]	Q9LRN8	AT3G17465
A0A2K3KZQ1	Trifolium	-0.255	0.576912	0.968	Unchanged	Uncharacterized protein	GO:0005634; GO:0006355; GO:0009908; GO:0010091; GO:0040008; GO:0048826; GO:0051781	cotyledon morphogenesis [GO:0048826]; flower development [GO:0009908]; positive regulation of cell division [GO:0051781]; regulation of DNA-templated transcription [GO:0006355]; regulation of growth [GO:0040008]; trichome branching [GO:0010091]	nucleus [GO:0005634]		Q9LIQ9	AT3G23980
A0A2K3KZR3	Trifolium	0.844	0.328943	0.955	Unchanged	Putative allergen Pru protein	GO:0005576		extracellular region [GO:0005576]		Q8GUG1	AT1G20030
A0A2K3KZR9	Trifolium	1.92	0.0831455	0.895	Unchanged	DUF1262 family protein					Q6NNH1	AT1G13520
A0A2K3KZS7	Trifolium	0.498	0.125374	0.919	Unchanged	Replication factor C subunit 4-like protein	GO:0005524; GO:0016887			ATP binding [GO:0005524]; ATP hydrolysis activity [GO:0016887]	Q93ZX1	AT1G21690
A0A2K3KZT3	Trifolium	-0.402	0.275146	0.95	Unchanged	Transcriptional corepressor LEUNIG-like protein	GO:0003714			transcription corepressor activity [GO:0003714]	Q9FUY2	AT4G32551
A0A2K3KZT5	Trifolium	0.616	0.20525	0.94	Unchanged	U5 small nuclear ribonucleoprotein 40 kDa-like protein	GO:1990904		ribonucleoprotein complex [GO:1990904]		Q683G3	AT5G50970
A0A2K3KZU2	Trifolium	0.657	0.28979	0.951	Unchanged	PfkB family carbohydrate kinase	GO:0016301; GO:0016310	phosphorylation [GO:0016310]		kinase activity [GO:0016301]	Q944J2	#N/A
A0A2K3KZV1	Trifolium	-0.39	0.0603154	0.872	Unchanged	UDP-glucose 6-dehydrogenase (EC 1.1.1.22)	GO:0003979; GO:0006065; GO:0051287	UDP-glucuronate biosynthetic process [GO:0006065]		NAD binding [GO:0051287]; UDP-glucose 6-dehydrogenase activity [GO:0003979]	Q9LIA8	AT3G29360
A0A2K3KZW3	Trifolium	0.22	0.676487	0.971	Unchanged	Cytochrome p450 94a1-like protein	GO:0004497; GO:0005506; GO:0016020; GO:0016705; GO:0020037		membrane [GO:0016020]	heme binding [GO:0020037]; iron ion binding [GO:0005506]; monooxygenase activity [GO:0004497]; oxidoreductase activity, acting on paired donors, with incorporation or reduction of molecular oxygen [GO:0016705]	Q9FMV7	AT5G63450
A0A2K3KZZ1	Trifolium	0.174	0.625656	0.97	Unchanged	U3 small nucleolar RNA-associated protein 18	GO:0005730; GO:0006364	rRNA processing [GO:0006364]	nucleolus [GO:0005730]		Q9FMU5	AT5G14050
A0A2K3KZZ3	Trifolium	0.443	0.348516	0.957	Unchanged	non-specific serine/threonine protein kinase (EC 2.7.11.1)	GO:0004672; GO:0005524; GO:0016310	phosphorylation [GO:0016310]		ATP binding [GO:0005524]; protein kinase activity [GO:0004672]	A0A1P8BAG1	#N/A
A0A2K3L006	Trifolium	0.553	0.369517	0.958	Unchanged	Cullin-associated NEDD8-dissociated protein 1-like	GO:0010265	SCF complex assembly [GO:0010265]			Q8L5Y6	AT2G02560
A0A2K3L024	Trifolium	-0.414	0.381555	0.959	Unchanged	Alkylated DNA repair protein alkb 8-like	GO:0008033; GO:0008175; GO:0008757; GO:0043412	macromolecule modification [GO:0043412]; tRNA processing [GO:0008033]		S-adenosylmethionine-dependent methyltransferase activity [GO:0008757]; tRNA methyltransferase activity [GO:0008175]	Q94A09	AT1G36310
A0A2K3L057	Trifolium	-0.476	0.305126	0.953	Unchanged	Hermes					Q9FY48	AT5G13530
A0A2K3L071	Trifolium	-0.588	0.0340359	0.818	Down-regulated	Glutamate decarboxylase (EC 4.1.1.15)	GO:0004351; GO:0006536; GO:0030170	glutamate metabolic process [GO:0006536]		glutamate decarboxylase activity [GO:0004351]; pyridoxal phosphate binding [GO:0030170]	Q42521	AT5G17330
A0A2K3L072	Trifolium	0.407	0.334281	0.955	Unchanged	WD repeat-containing protein 3-like					Q9LVF2	AT3G21540
A0A2K3L073	Trifolium	-0.388	0.33066	0.955	Unchanged	Nucleic acid-binding OB-fold-like protein	GO:0016020		membrane [GO:0016020]		Q9ZUC0	#N/A
A0A2K3L084	Trifolium	0.133	0.817616	0.975	Unchanged	UDP-glycosyltransferase 91A1-like protein	GO:0008194			UDP-glycosyltransferase activity [GO:0008194]	Q940V3	AT2G22590
A0A2K3L090	Trifolium	0.774	0.0318175	0.811	Up-regulated	Cystathionine beta-lyase chloroplastic-like	GO:0016829; GO:0019346; GO:0030170	transsulfuration [GO:0019346]		lyase activity [GO:0016829]; pyridoxal phosphate binding [GO:0030170]	F4J244	#N/A
A0A2K3L091	Trifolium	-0.244	0.260052	0.948	Unchanged	60S ribosomal protein L13	GO:0003735; GO:0005840; GO:0006412; GO:1990904	translation [GO:0006412]	ribonucleoprotein complex [GO:1990904]; ribosome [GO:0005840]	structural constituent of ribosome [GO:0003735]	P41127	AT3G49010
A0A2K3L098	Trifolium	0.454	0.519902	0.966	Unchanged	Carbon catabolite repressor-like protein	GO:0003824			catalytic activity [GO:0003824]	A0A1P8AWP9	#N/A
A0A2K3L0A8	Trifolium	0.189	0.507354	0.966	Unchanged	PPM-type phosphatase domain-containing protein	GO:0004722			protein serine/threonine phosphatase activity [GO:0004722]	Q9S9Z7	AT1G34750
A0A2K3L0A9	Trifolium	-1.13	0.0319368	0.811	Down-regulated	ATP synthase protein MI25	GO:0000276; GO:0015078; GO:0015986	proton motive force-driven ATP synthesis [GO:0015986]	mitochondrial proton-transporting ATP synthase complex, coupling factor F(o) [GO:0000276]	proton transmembrane transporter activity [GO:0015078]	Q04613	#N/A
A0A2K3L0B0	Trifolium	0.222	0.588326	0.969	Unchanged	Respiratory burst oxidase protein A-like	GO:0016020; GO:0016491		membrane [GO:0016020]	oxidoreductase activity [GO:0016491]	O48538	AT1G64060
A0A2K3L0B3	Trifolium	-0.453	0.238082	0.945	Unchanged	F-box/LRR-repeat protein 4-like					Q9FMW7	AT5G23340
A0A2K3L0D1	Trifolium	-0.403	0.309927	0.953	Unchanged	Dihydrolipoyl dehydrogenase-like protein	GO:0016668			oxidoreductase activity, acting on a sulfur group of donors, NAD(P) as acceptor [GO:0016668]	A8MS68	AT3G16950
A0A2K3L0E6	Trifolium	0.387	0.383281	0.959	Unchanged	Saccharopine dehydrogenase-like protein	GO:0016020		membrane [GO:0016020]		Q8LGI2	AT5G39410
A0A2K3L0E7	Trifolium	0.926	0.123107	0.918	Unchanged	Putative inactive receptor kinase	GO:0004672; GO:0005524; GO:0016020; GO:0016310	phosphorylation [GO:0016310]	membrane [GO:0016020]	ATP binding [GO:0005524]; protein kinase activity [GO:0004672]	Q9LVM0	AT5G58300
A0A2K3L0E9	Trifolium	0.67	0.0366911	0.826	Up-regulated	Er membrane protein complex subunit 8/9	GO:0072546		EMC complex [GO:0072546]		Q9FG71	AT5G55940
A0A2K3L0H0	Trifolium	-0.0623	0.806648	0.974	Unchanged	Monodehydroascorbate reductase	GO:0016491			oxidoreductase activity [GO:0016491]	P92947	AT1G63940
A0A2K3L0I0	Trifolium	0.774	0.458261	0.963	Unchanged	Nascent polypeptide-associated complex subunit alpha-like protein	GO:0005854		nascent polypeptide-associated complex [GO:0005854]		Q9LHG9	AT3G12390
A0A2K3L0I1	Trifolium	-0.916	0.0053499	0.592	Down-regulated	Transcription factor Pur-alpha 1	GO:0000977; GO:0005634; GO:0032422		nucleus [GO:0005634]	purine-rich negative regulatory element binding [GO:0032422]; RNA polymerase II transcription regulatory region sequence-specific DNA binding [GO:0000977]	Q9SKZ1	AT2G32080
A0A2K3L0I2	Trifolium	-2.29	0.000159155	0.145	Down-regulated	Tryptophan synthase (EC 4.2.1.20)	GO:0004834			tryptophan synthase activity [GO:0004834]	P25269	AT4G27070
A0A2K3L0I3	Trifolium	0.299	0.366718	0.958	Unchanged	RNA helicase (EC 3.6.4.13)	GO:0003724; GO:0003743; GO:0005524; GO:0016787			ATP binding [GO:0005524]; hydrolase activity [GO:0016787]; RNA helicase activity [GO:0003724]; translation initiation factor activity [GO:0003743]	P41377	AT1G54270
A0A2K3L0I4	Trifolium	-0.267	0.238318	0.945	Unchanged	Isocitrate dehydrogenase	GO:0004450; GO:0006102; GO:0046872	isocitrate metabolic process [GO:0006102]		isocitrate dehydrogenase (NADP+) activity [GO:0004450]; metal ion binding [GO:0046872]	A0A1P8ASL1	#N/A
A0A2K3L0J1	Trifolium	0.474	0.34997	0.957	Unchanged	UDP-glycosyltransferase 87A2-like protein	GO:0008194			UDP-glycosyltransferase activity [GO:0008194]	O64732	AT2G30150
A0A2K3L0J7	Trifolium	0.399	0.587555	0.969	Unchanged	Eukaryotic translation initiation factor 3 subunit j-like protein	GO:0003743; GO:0005852		eukaryotic translation initiation factor 3 complex [GO:0005852]	translation initiation factor activity [GO:0003743]	Q8GRX2	AT5G37475
A0A2K3L0K1	Trifolium	-0.133	0.575176	0.968	Unchanged	Putative 26S proteasome non-ATPase regulatory subunit 6-like protein	GO:0000502		proteasome complex [GO:0000502]		Q93Y35	AT4G24820
A0A2K3L0K5	Trifolium	-0.297	0.467189	0.964	Unchanged	2-isopropylmalate synthase chloroplastic-like					A0A1P8AUZ8	#N/A
A0A2K3L0N8	Trifolium	0.12	0.830024	0.975	Unchanged	non-specific serine/threonine protein kinase (EC 2.7.11.1)	GO:0004674; GO:0005524; GO:0016310	phosphorylation [GO:0016310]		ATP binding [GO:0005524]; protein serine/threonine kinase activity [GO:0004674]	Q38997	AT3G01090
A0A2K3L0P9	Trifolium	0.0512	0.831825	0.975	Unchanged	UDP-sulfoquinovose synthase chloroplastic-like protein					O48917	AT4G33030
A0A2K3L0Q5	Trifolium	-0.363	0.203322	0.94	Unchanged	phosphoribosylaminoimidazolesuccinocarboxamide synthase (EC 6.3.2.6) (SAICAR synthetase)	GO:0004639; GO:0005524; GO:0006189	'de novo' IMP biosynthetic process [GO:0006189]		ATP binding [GO:0005524]; phosphoribosylaminoimidazolesuccinocarboxamide synthase activity [GO:0004639]	P38025	AT3G21110
A0A2K3L0R0	Trifolium	-0.0384	0.904138	0.976	Unchanged	Starch synthase, chloroplastic/amyloplastic (EC 2.4.1.-)	GO:0004373; GO:0009501; GO:0009507; GO:0019252	starch biosynthetic process [GO:0019252]	amyloplast [GO:0009501]; chloroplast [GO:0009507]	glycogen (starch) synthase activity [GO:0004373]	Q9MAQ0	AT1G32900
A0A2K3L0R4	Trifolium	-0.483	0.127864	0.92	Unchanged	Receptor-like protein kinase	GO:0004672; GO:0005524; GO:0005886; GO:0016310	phosphorylation [GO:0016310]	plasma membrane [GO:0005886]	ATP binding [GO:0005524]; protein kinase activity [GO:0004672]	Q9ZUF4	AT2G05940
A0A2K3L0S3	Trifolium	-0.526	0.369245	0.958	Unchanged	DUF538 family protein					Q9SRX5	AT1G02816
A0A2K3L0T1	Trifolium	-0.0891	0.844701	0.975	Unchanged	Universal stress A-like protein					Q9M328	AT3G53990
A0A2K3L0T4	Trifolium	-1.39	0.00869236	0.65	Down-regulated	Isoflavone 2'-hydroxylase-like protein	GO:0004497; GO:0005506; GO:0016020; GO:0016705; GO:0020037		membrane [GO:0016020]	heme binding [GO:0020037]; iron ion binding [GO:0005506]; monooxygenase activity [GO:0004497]; oxidoreductase activity, acting on paired donors, with incorporation or reduction of molecular oxygen [GO:0016705]	Q0WVW6	AT1G66540
A0A2K3L0U0	Trifolium	-0.457	0.433925	0.962	Unchanged	N-alpha-acetyltransferase 15 NatA auxiliary subunit-like protein	GO:0016740			transferase activity [GO:0016740]	Q8VZM1	AT1G80410
A0A2K3L0U5	Trifolium	-0.52	0.359144	0.957	Unchanged	Proton gradient regulation 7					Q9LU39	AT3G21200
A0A2K3L0V5	Trifolium	-1.03	0.049236	0.855	Down-regulated	1-aminocyclopropane-1-carboxylate deaminase-like protein	GO:0005739; GO:0009693; GO:0019148; GO:0019447; GO:1990170	D-cysteine catabolic process [GO:0019447]; ethylene biosynthetic process [GO:0009693]; stress response to cadmium ion [GO:1990170]	mitochondrion [GO:0005739]	D-cysteine desulfhydrase activity [GO:0019148]	F4HYF3	AT1G48420
A0A2K3L0V6	Trifolium	0.104	0.805338	0.974	Unchanged	Protein tolB					A0A1P8B8B4	AT4G01870
A0A2K3L0W3	Trifolium	-0.872	0.0715283	0.885	Unchanged	Exportin 7	GO:0005049; GO:0005634		nucleus [GO:0005634]	nuclear export signal receptor activity [GO:0005049]	A0A1P8BC62	#N/A
A0A2K3L0W8	Trifolium	-0.125	0.57616	0.968	Unchanged	Glutamine-tRNA ligase	GO:0004819; GO:0005524; GO:0005737; GO:0006425; GO:0009791; GO:0048608	glutaminyl-tRNA aminoacylation [GO:0006425]; post-embryonic development [GO:0009791]; reproductive structure development [GO:0048608]	cytoplasm [GO:0005737]	ATP binding [GO:0005524]; glutamine-tRNA ligase activity [GO:0004819]	Q8W4F3	AT1G25350
A0A2K3L0X6	Trifolium	-0.886	0.104887	0.909	Unchanged	Peptidyl-prolyl cis-trans isomerase e-like protein	GO:0016853			isomerase activity [GO:0016853]	Q0WRA3	AT1G13690
A0A2K3L101	Trifolium	0.305	0.693716	0.972	Unchanged	mRNA (guanine-N(7))-methyltransferase (EC 2.1.1.56)	GO:0003723; GO:0004482			mRNA 5'-cap (guanine-N7-)-methyltransferase activity [GO:0004482]; RNA binding [GO:0003723]	Q5HZ60	AT3G52210
A0A2K3L107	Trifolium	0.0807	0.811373	0.975	Unchanged	DNA-directed RNA polymerase (EC 2.7.7.6)	GO:0000428; GO:0003677; GO:0003899; GO:0006351; GO:0032549	DNA-templated transcription [GO:0006351]	DNA-directed RNA polymerase complex [GO:0000428]	DNA binding [GO:0003677]; DNA-directed 5'-3' RNA polymerase activity [GO:0003899]; ribonucleoside binding [GO:0032549]	P38420	AT4G21710
A0A2K3L130	Trifolium	-0.0536	0.776105	0.974	Unchanged	Serine/threonine protein phosphatase 2A 55 kDa regulatory subunit B beta-like protein	GO:0000159; GO:0019888		protein phosphatase type 2A complex [GO:0000159]	protein phosphatase regulator activity [GO:0019888]	Q39247	AT1G17720
A0A2K3L138	Trifolium	0.97	0.10758	0.911	Unchanged	glutathione transferase (EC 2.5.1.18)	GO:0004364; GO:0005829; GO:0009407	toxin catabolic process [GO:0009407]	cytosol [GO:0005829]	glutathione transferase activity [GO:0004364]	O80852	AT2G30860
A0A2K3L141	Trifolium	-0.411	0.10063	0.907	Unchanged	Putative inactive receptor kinase	GO:0004672; GO:0005524; GO:0016310	phosphorylation [GO:0016310]		ATP binding [GO:0005524]; protein kinase activity [GO:0004672]	Q9LP77	AT1G48480
A0A2K3L170	Trifolium	0.0137	0.955779	0.977	Unchanged	Ubiquitin-like modifier-activating enzyme ATG7-like protein	GO:0008641; GO:0010150; GO:0050832	defense response to fungus [GO:0050832]; leaf senescence [GO:0010150]		ubiquitin-like modifier activating enzyme activity [GO:0008641]	Q94CD5	AT5G45900
A0A2K3L186	Trifolium	-0.49	0.15696	0.929	Unchanged	Sulfite oxidase-like protein	GO:0016491			oxidoreductase activity [GO:0016491]	Q9S850	AT3G01910
A0A2K3L189	Trifolium	-0.128	0.807507	0.974	Unchanged	Putative serine threonine-protein kinase	GO:0004672; GO:0005524; GO:0009742; GO:0016310	brassinosteroid mediated signaling pathway [GO:0009742]; phosphorylation [GO:0016310]		ATP binding [GO:0005524]; protein kinase activity [GO:0004672]	Q9FIL1	AT5G59010
A0A2K3L197	Trifolium	0.486	0.046015	0.849	Unchanged	Cytochrome c oxidase assembly protein cox15-like protein	GO:0006784; GO:0016020; GO:0016653	heme A biosynthetic process [GO:0006784]	membrane [GO:0016020]	oxidoreductase activity, acting on NAD(P)H, heme protein as acceptor [GO:0016653]	Q9FKT8	AT5G56090
A0A2K3L1B2	Trifolium	0.132	0.842567	0.975	Unchanged	Bifunctional monodehydroascorbate reductase and carbonic anhydrase nectarin-3-like protein	GO:0004089; GO:0008270; GO:0009570		chloroplast stroma [GO:0009570]	carbonate dehydratase activity [GO:0004089]; zinc ion binding [GO:0008270]	Q8L817	AT1G08080
A0A2K3L1B6	Trifolium	0.521	0.34037	0.956	Unchanged	SWI/SNF complex subunit SWI3A-like protein	GO:0003677; GO:0005634		nucleus [GO:0005634]	DNA binding [GO:0003677]	A0A1P8B194	#N/A
A0A2K3L1C0	Trifolium	0.216	0.715941	0.972	Unchanged	non-specific serine/threonine protein kinase (EC 2.7.11.1)	GO:0004674; GO:0016020; GO:0016310	phosphorylation [GO:0016310]	membrane [GO:0016020]	protein serine/threonine kinase activity [GO:0004674]	C0LGN2	AT3G14840
A0A2K3L1D0	Trifolium	-0.0109	0.970636	0.977	Unchanged	WRKY transcription factor	GO:0003700; GO:0005634; GO:0043565		nucleus [GO:0005634]	DNA-binding transcription factor activity [GO:0003700]; sequence-specific DNA binding [GO:0043565]	Q9ZQ70	AT2G03340
A0A2K3L1D1	Trifolium	-0.197	0.745663	0.973	Unchanged	Nucleolar complex protein 2	GO:0005634		nucleus [GO:0005634]		Q9ZPV5	AT2G18220
A0A2K3L1D6	Trifolium	0.372	0.375332	0.959	Unchanged	Exocyst subunit Exo70 family protein	GO:0000145; GO:0005546; GO:0006887; GO:0015031	exocytosis [GO:0006887]; protein transport [GO:0015031]	exocyst [GO:0000145]	phosphatidylinositol-4,5-bisphosphate binding [GO:0005546]	F4KJ98	AT5G59730
A0A2K3L1D7	Trifolium	0.142	0.841979	0.975	Unchanged	glucan endo-1,3-beta-D-glucosidase (EC 3.2.1.39) ((1->3)-beta-glucan endohydrolase) (Beta-1,3-endoglucanase)	GO:0005975; GO:0042973	carbohydrate metabolic process [GO:0005975]		glucan endo-1,3-beta-D-glucosidase activity [GO:0042973]	Q9FJU9	AT5G56590
A0A2K3L1E0	Trifolium	0.229	0.473707	0.964	Unchanged	Dihydropyrimidinase	GO:0016810			hydrolase activity, acting on carbon-nitrogen (but not peptide) bonds [GO:0016810]	Q9FMP3	AT5G12200
A0A2K3L1E4	Trifolium	0.374	0.525823	0.966	Unchanged	PHD finger protein ALFIN-LIKE	GO:0005634; GO:0006325; GO:0006355; GO:0016020; GO:0042393; GO:0046872	chromatin organization [GO:0006325]; regulation of DNA-templated transcription [GO:0006355]	membrane [GO:0016020]; nucleus [GO:0005634]	histone binding [GO:0042393]; metal ion binding [GO:0046872]	Q9SRM4	AT3G11200
A0A2K3L1G6	Trifolium	-0.55	0.00823795	0.645	Unchanged	SNW domain-containing protein 1-like	GO:0000398; GO:0005681	mRNA splicing, via spliceosome [GO:0000398]	spliceosomal complex [GO:0005681]		O80653	AT1G77180
A0A2K3L1H6	Trifolium	-0.754	0.147759	0.926	Unchanged	1-aminocyclopropane-1-carboxylate oxidase-like protein	GO:0044550; GO:0046872; GO:0051213	secondary metabolite biosynthetic process [GO:0044550]		dioxygenase activity [GO:0051213]; metal ion binding [GO:0046872]	Q8H1S4	AT1G06650
A0A2K3L1H7	Trifolium	1.16	0.0159477	0.717	Up-regulated	SNF1-related protein kinase regulatory subunit gamma-1-like protein	GO:0016301; GO:0016310	phosphorylation [GO:0016310]		kinase activity [GO:0016301]	Q8LBB2	AT3G48530
A0A2K3L1I0	Trifolium	0.0238	0.956289	0.977	Unchanged	Dicer-like protein 4-like	GO:0003723; GO:0005634; GO:0006353; GO:0010050; GO:0010267; GO:0010599; GO:0016891; GO:0051214	DNA-templated transcription termination [GO:0006353]; lsiRNA processing [GO:0010599]; RNAi-mediated antiviral immunity against RNA virus [GO:0051214]; ta-siRNA processing [GO:0010267]; vegetative phase change [GO:0010050]	nucleus [GO:0005634]	RNA binding [GO:0003723]; RNA endonuclease activity, producing 5'-phosphomonoesters [GO:0016891]	A0A1P8B9N9	#N/A
A0A2K3L1I2	Trifolium	0.601	0.0168036	0.724	Up-regulated	Putative mitochondrial-processing peptidase subunit beta-like protein	GO:0004222; GO:0005739; GO:0006508; GO:0046872	proteolysis [GO:0006508]	mitochondrion [GO:0005739]	metal ion binding [GO:0046872]; metalloendopeptidase activity [GO:0004222]	Q42290	AT3G02090
A0A2K3L1L0	Trifolium	-0.0115	0.958179	0.977	Unchanged	Eukaryotic translation initiation factor 5A (eIF-5A)	GO:0003723; GO:0003743; GO:0003746; GO:0043022; GO:0045901; GO:0045905	positive regulation of translational elongation [GO:0045901]; positive regulation of translational termination [GO:0045905]		ribosome binding [GO:0043022]; RNA binding [GO:0003723]; translation elongation factor activity [GO:0003746]; translation initiation factor activity [GO:0003743]	Q9XI91	AT1G13950
A0A2K3L1L3	Trifolium	1.04	0.0186038	0.739	Up-regulated	Small ubiquitin-related modifier (SUMO)	GO:0005634; GO:0005737		cytoplasm [GO:0005737]; nucleus [GO:0005634]		F4K3D6	#N/A
A0A2K3L1L5	Trifolium	-0.456	0.637794	0.97	Unchanged	Peroxidase (EC 1.11.1.7)	GO:0005576; GO:0006979; GO:0020037; GO:0042744; GO:0046872; GO:0140825	hydrogen peroxide catabolic process [GO:0042744]; response to oxidative stress [GO:0006979]	extracellular region [GO:0005576]	heme binding [GO:0020037]; lactoperoxidase activity [GO:0140825]; metal ion binding [GO:0046872]	Q42578	AT5G06720
A0A2K3L1M7	Trifolium	0.126	0.796103	0.974	Unchanged	beta-galactosidase (EC 3.2.1.23)	GO:0004565; GO:0005975	carbohydrate metabolic process [GO:0005975]		beta-galactosidase activity [GO:0004565]	A0A1P8AMY9	#N/A
A0A2K3L1P9	Trifolium	-0.134	0.594633	0.969	Unchanged	60S ribosomal export protein NMD3	GO:0005634; GO:0005737; GO:0015031; GO:0043023	protein transport [GO:0015031]	cytoplasm [GO:0005737]; nucleus [GO:0005634]	ribosomal large subunit binding [GO:0043023]	Q9SI58	AT2G03820
A0A2K3L1Q6	Trifolium	-0.218	0.58899	0.969	Unchanged	DUF569 domain-containing protein					A0A1P8AQI0	#N/A
A0A2K3L1R2	Trifolium	0.924	0.0896318	0.9	Unchanged	Serine/threonine-protein kinase AFC3-like protein	GO:0004674; GO:0005524; GO:0016310	phosphorylation [GO:0016310]		ATP binding [GO:0005524]; protein serine/threonine kinase activity [GO:0004674]	A0A178UXE2	#N/A
A0A2K3L1R7	Trifolium	-0.695	0.0119579	0.681	Down-regulated	GDP-D-mannose-3,5-epimerase	GO:0047918; GO:0051287			GDP-mannose 3,5-epimerase activity [GO:0047918]; NAD binding [GO:0051287]	Q93VR3	AT5G28840
A0A2K3L1S7	Trifolium	0.283	0.418303	0.961	Unchanged	Trihelix transcription factor GT-3b-like protein					O80450	AT2G38250
A0A2K3L1T2	Trifolium	0.749	0.259659	0.948	Unchanged	Membrin-11-like protein	GO:0005484; GO:0005794; GO:0015031; GO:0016020; GO:0016192	protein transport [GO:0015031]; vesicle-mediated transport [GO:0016192]	Golgi apparatus [GO:0005794]; membrane [GO:0016020]	SNAP receptor activity [GO:0005484]	Q9SJL6	AT2G36900
A0A2K3L1T3	Trifolium	0.275	0.458749	0.963	Unchanged	UDP-glucose 6-dehydrogenase (EC 1.1.1.22)	GO:0003979; GO:0006065; GO:0051287	UDP-glucuronate biosynthetic process [GO:0006065]		NAD binding [GO:0051287]; UDP-glucose 6-dehydrogenase activity [GO:0003979]	Q9LIA8	AT3G29360
A0A2K3L1U0	Trifolium	-0.644	0.0359476	0.824	Down-regulated	Fiber protein fb34	GO:0016020		membrane [GO:0016020]		Q940M6	AT4G27435
A0A2K3L1U3	Trifolium	-0.144	0.751809	0.973	Unchanged	DUF2921 family protein	GO:0016020		membrane [GO:0016020]		Q9SVS7	AT4G21700
A0A2K3L1V3	Trifolium	-0.413	0.0689973	0.882	Unchanged	60S ribosomal protein l4-like	GO:0003735; GO:0005840; GO:0006412; GO:1990904	translation [GO:0006412]	ribonucleoprotein complex [GO:1990904]; ribosome [GO:0005840]	structural constituent of ribosome [GO:0003735]	Q9SF40	AT3G09630
A0A2K3L1W5	Trifolium	-0.473	0.349933	0.957	Unchanged	Transmembrane protein 33	GO:0016020		membrane [GO:0016020]		A0A178VC85	AT3G02420
A0A2K3L1W7	Trifolium	-0.052	0.882201	0.976	Unchanged	Uncharacterized protein					Q9SA50	AT1G16520
A0A2K3L1X3	Trifolium	-0.255	0.650952	0.971	Unchanged	Geminivirus rep-interacting motor	GO:0003777; GO:0005524; GO:0005874; GO:0007018; GO:0008017	microtubule-based movement [GO:0007018]	microtubule [GO:0005874]	ATP binding [GO:0005524]; microtubule binding [GO:0008017]; microtubule motor activity [GO:0003777]	Q9LX99	AT5G10470
A0A2K3L1X9	Trifolium	0.171	0.790613	0.974	Unchanged	Gibberellin 20-oxidase	GO:0016491; GO:0046872			metal ion binding [GO:0046872]; oxidoreductase activity [GO:0016491]	Q39110	AT4G25420
A0A2K3L1Y1	Trifolium	-0.182	0.563065	0.968	Unchanged	Protein SAY1					A0A1P8B4Q3	#N/A
A0A2K3L1Y6	Trifolium	0.199	0.61737	0.97	Unchanged	Ankyrin repeat domain-containing protein					Q8GX17	#N/A
A0A2K3L1Z2	Trifolium	0.0115	0.972348	0.977	Unchanged	AT-hook motif nuclear-localized protein	GO:0003680; GO:0005634		nucleus [GO:0005634]	minor groove of adenine-thymine-rich DNA binding [GO:0003680]	Q8VYJ2	AT4G12080
A0A2K3L1Z5	Trifolium	0.364	0.111575	0.913	Unchanged	ATP synthase subunit alpha, mitochondrial	GO:0005524; GO:0005743; GO:0045261; GO:0046933		mitochondrial inner membrane [GO:0005743]; proton-transporting ATP synthase complex, catalytic core F(1) [GO:0045261]	ATP binding [GO:0005524]; proton-transporting ATP synthase activity, rotational mechanism [GO:0046933]	P92549	#N/A
A0A2K3L206	Trifolium	-0.359	0.635907	0.97	Unchanged	Annexin-like protein rj4-like	GO:0005509; GO:0005544; GO:0006950	response to stress [GO:0006950]		calcium ion binding [GO:0005509]; calcium-dependent phospholipid binding [GO:0005544]	Q94CK4	AT5G12380
A0A2K3L210	Trifolium	0.664	0.511561	0.966	Unchanged	Phosphate metabolism protein					Q9SKY5	#N/A
A0A2K3L216	Trifolium	-0.52	0.394596	0.96	Unchanged	RNA helicase (EC 3.6.4.13)	GO:0004386			helicase activity [GO:0004386]	A0A1P8AQ84	#N/A
A0A2K3L240	Trifolium	-1.23	0.0132301	0.692	Down-regulated	Arginyl-tRNA synthetase	GO:0004814; GO:0005524; GO:0005737; GO:0006420; GO:0009791; GO:0048608	arginyl-tRNA aminoacylation [GO:0006420]; post-embryonic development [GO:0009791]; reproductive structure development [GO:0048608]	cytoplasm [GO:0005737]	arginine-tRNA ligase activity [GO:0004814]; ATP binding [GO:0005524]	O23247	AT4G26300
A0A2K3L251	Trifolium	-0.239	0.387947	0.959	Unchanged	Pectinesterase (EC 3.1.1.11)	GO:0004857; GO:0005576; GO:0016020; GO:0030599; GO:0042545; GO:0045330; GO:0045490	cell wall modification [GO:0042545]; pectin catabolic process [GO:0045490]	extracellular region [GO:0005576]; membrane [GO:0016020]	aspartyl esterase activity [GO:0045330]; enzyme inhibitor activity [GO:0004857]; pectinesterase activity [GO:0030599]	Q1JPL7	AT1G11580
A0A2K3L263	Trifolium	-2.22	0.000133643	0.136	Down-regulated	starch synthase (EC 2.4.1.21)					Q0WVX5	AT4G18240
A0A2K3L273	Trifolium	0.129	0.704702	0.972	Unchanged	Uncharacterized protein					O64870	AT2G44360
A0A2K3L291	Trifolium	-0.196	0.610926	0.969	Unchanged	Ubiquitin carboxyl-terminal hydrolase (EC 3.4.19.12)	GO:0004843; GO:0006511	ubiquitin-dependent protein catabolic process [GO:0006511]		cysteine-type deubiquitinase activity [GO:0004843]	O04482	AT1G65650
A0A2K3L293	Trifolium	-0.346	0.178549	0.935	Unchanged	RNA helicase (EC 3.6.4.13)	GO:0004386			helicase activity [GO:0004386]	Q93ZG7	AT3G53110
A0A2K3L2A2	Trifolium	-0.513	0.201554	0.939	Unchanged	AMP deaminase	GO:0003876; GO:0032264	IMP salvage [GO:0032264]		AMP deaminase activity [GO:0003876]	O80452	AT2G38280
A0A2K3L2A3	Trifolium	0.2	0.352988	0.957	Unchanged	S-methyl-5-thioribose kinase (EC 2.7.1.100)	GO:0009086; GO:0016310; GO:0046522	methionine biosynthetic process [GO:0009086]; phosphorylation [GO:0016310]		S-methyl-5-thioribose kinase activity [GO:0046522]	Q9C6D2	AT1G49820
A0A2K3L2B2	Trifolium	-0.18	0.548912	0.967	Unchanged	Translationally-controlled tumor protein-like protein					P31265	AT3G16640
A0A2K3L2D5	Trifolium	-0.375	0.504078	0.965	Unchanged	TPR superfamily protein					Q9ZUS6	AT2G37400
A0A2K3L2E5	Trifolium	-0.0401	0.924863	0.977	Unchanged	H(+)-exporting diphosphatase (EC 7.1.3.1)	GO:0004427; GO:0009678; GO:0016020		membrane [GO:0016020]	diphosphate hydrolysis-driven proton transmembrane transporter activity [GO:0009678]; inorganic diphosphate phosphatase activity [GO:0004427]	P31414	AT1G15690
A0A2K3L2G5	Trifolium	0.205	0.74736	0.973	Unchanged	Protein LURP-one-related 12-like					Q9LVZ8	AT3G15810
A0A2K3L2H7	Trifolium	-0.395	0.220448	0.942	Unchanged	non-specific serine/threonine protein kinase (EC 2.7.11.1)	GO:0004674; GO:0005524; GO:0005886; GO:0016310; GO:0046872	phosphorylation [GO:0016310]	plasma membrane [GO:0005886]	ATP binding [GO:0005524]; metal ion binding [GO:0046872]; protein serine/threonine kinase activity [GO:0004674]	Q9LV48	AT3G24550
A0A2K3L2I3	Trifolium	-0.0509	0.94127	0.977	Unchanged	PB1 domain-containing protein					Q9FGF3	AT5G64430
A0A2K3L2I5	Trifolium	-0.22	0.709327	0.972	Unchanged	Peroxidase (EC 1.11.1.7)	GO:0005576; GO:0006979; GO:0020037; GO:0042744; GO:0046872; GO:0140825	hydrogen peroxide catabolic process [GO:0042744]; response to oxidative stress [GO:0006979]	extracellular region [GO:0005576]	heme binding [GO:0020037]; lactoperoxidase activity [GO:0140825]; metal ion binding [GO:0046872]	Q42578	AT5G06720
A0A2K3L2J5	Trifolium	0.0315	0.914191	0.977	Unchanged	Cullin-3a-like protein	GO:0006511; GO:0008757; GO:0031625	ubiquitin-dependent protein catabolic process [GO:0006511]		S-adenosylmethionine-dependent methyltransferase activity [GO:0008757]; ubiquitin protein ligase binding [GO:0031625]	Q9C9L0	AT1G69670
A0A2K3L2K6	Trifolium	-0.349	0.177291	0.934	Unchanged	Pre-mRNA-processing factor 6-like protein	GO:0000398	mRNA splicing, via spliceosome [GO:0000398]			Q9ZT71	AT4G03430
A0A2K3L2K8	Trifolium	-0.0085	0.961861	0.977	Unchanged	Pentatricopeptide repeat-containing protein mitochondrial-like	GO:0008380	RNA splicing [GO:0008380]			Q8LPF1	AT5G15980
A0A2K3L2L1	Trifolium	1.32	0.16386	0.931	Unchanged	Splicing factor 3B subunit 4-like protein	GO:0003729; GO:0005634; GO:0006357; GO:0009793; GO:0010075; GO:0070063	embryo development ending in seed dormancy [GO:0009793]; regulation of meristem growth [GO:0010075]; regulation of transcription by RNA polymerase II [GO:0006357]	nucleus [GO:0005634]	mRNA binding [GO:0003729]; RNA polymerase binding [GO:0070063]	Q9ZU66	AT2G18510
A0A2K3L2L2	Trifolium	-1.3	0.142107	0.925	Unchanged	Isoflavone 2'-hydroxylase-like protein	GO:0004497; GO:0005506; GO:0016020; GO:0016705; GO:0020037		membrane [GO:0016020]	heme binding [GO:0020037]; iron ion binding [GO:0005506]; monooxygenase activity [GO:0004497]; oxidoreductase activity, acting on paired donors, with incorporation or reduction of molecular oxygen [GO:0016705]	O23154	AT4G37340
A0A2K3L2Q6	Trifolium	-0.199	0.366152	0.958	Unchanged	DNA-directed RNA polymerase (EC 2.7.7.6)	GO:0000428; GO:0003677; GO:0003899; GO:0006351; GO:0016020; GO:0032549	DNA-templated transcription [GO:0006351]	DNA-directed RNA polymerase complex [GO:0000428]; membrane [GO:0016020]	DNA binding [GO:0003677]; DNA-directed 5'-3' RNA polymerase activity [GO:0003899]; ribonucleoside binding [GO:0032549]	A0A1I9LNQ8	#N/A
A0A2K3L2R6	Trifolium	0.11	0.837594	0.975	Unchanged	peroxidase (EC 1.11.1.7)	GO:0006979; GO:0020037; GO:0042744; GO:0046872; GO:0140825	hydrogen peroxide catabolic process [GO:0042744]; response to oxidative stress [GO:0006979]		heme binding [GO:0020037]; lactoperoxidase activity [GO:0140825]; metal ion binding [GO:0046872]	P24102	AT2G38380
A0A2K3L2R7	Trifolium	-0.118	0.750844	0.973	Unchanged	Putative WD repeat-containing protein	GO:0006355	regulation of DNA-templated transcription [GO:0006355]			Q0WV90	AT1G80490
A0A2K3L2T1	Trifolium	-0.361	0.539791	0.967	Unchanged	Ribosome biogenesis protein NSA2 homolog	GO:0005730; GO:0006364; GO:1990904	rRNA processing [GO:0006364]	nucleolus [GO:0005730]; ribonucleoprotein complex [GO:1990904]		Q9FNH2	AT5G06360
A0A2K3L2T2	Trifolium	0.753	0.372725	0.958	Unchanged	Nascent polypeptide-associated complex subunit alpha-like protein	GO:0005854; GO:0015031	protein transport [GO:0015031]	nascent polypeptide-associated complex [GO:0005854]		Q94JX9	AT3G49470
A0A2K3L2T5	Trifolium	0.774	0.041907	0.84	Up-regulated	Transportin-3-like protein	GO:0006606; GO:0031267	protein import into nucleus [GO:0006606]		small GTPase binding [GO:0031267]	Q8GUL2	AT5G62600
A0A2K3L2U9	Trifolium	-0.213	0.63296	0.97	Unchanged	Ribonuclease UK114-like protein					Q94JQ4	AT3G20390
A0A2K3L2V0	Trifolium	0.0533	0.917553	0.977	Unchanged	Protein kinase 2B	GO:0004674; GO:0005524; GO:0016310	phosphorylation [GO:0016310]		ATP binding [GO:0005524]; protein serine/threonine kinase activity [GO:0004674]	Q9SII6	AT2G17220
A0A2K3L2V7	Trifolium	-0.0642	0.926405	0.977	Unchanged	Putative sulfate transporter 3.4-like protein	GO:0016020; GO:0055085	transmembrane transport [GO:0055085]	membrane [GO:0016020]		Q9LW86	AT3G15990
A0A2K3L2W3	Trifolium	-0.581	0.235649	0.945	Unchanged	Thaumatin-like protein 1-like	GO:0005576		extracellular region [GO:0005576]		Q9LNT0	#N/A
A0A2K3L2W9	Trifolium	1.8	0.00248949	0.488	Up-regulated	Retrotransposon-related protein					P92523	#N/A
A0A2K3L2Z0	Trifolium	-0.556	0.0332806	0.816	Unchanged	RNA-binding (RRM/RBD/RNP motif) family protein	GO:0003723			RNA binding [GO:0003723]	Q9LKA4	AT3G15010
A0A2K3L2Z6	Trifolium	0.247	0.730846	0.973	Unchanged	Putative acyl-activating enzyme peroxisomal-like	GO:0005829		cytosol [GO:0005829]		F4HUK6	AT1G20560
A0A2K3L301	Trifolium	-0.262	0.283167	0.951	Unchanged	Transmembrane 9 superfamily member	GO:0000139; GO:0010008		endosome membrane [GO:0010008]; Golgi membrane [GO:0000139]		Q9ZPS7	AT2G01970
A0A2K3L303	Trifolium	0.277	0.310553	0.953	Unchanged	Ribonuclease H superfamily polynucleotidyl transferase	GO:0003676; GO:0016740			nucleic acid binding [GO:0003676]; transferase activity [GO:0016740]	Q0V842	AT5G61390
A0A2K3L304	Trifolium	-0.386	0.568113	0.968	Unchanged	Protein disulfide-isomerase 5-4-like	GO:0016020; GO:0016853		membrane [GO:0016020]	isomerase activity [GO:0016853]	Q9T042	AT4G27080
A0A2K3L305	Trifolium	-0.714	0.194042	0.938	Unchanged	Chitinase-like protein 2-like	GO:0004568; GO:0006032; GO:0006952; GO:0008061; GO:0016998	cell wall macromolecule catabolic process [GO:0016998]; chitin catabolic process [GO:0006032]; defense response [GO:0006952]		chitin binding [GO:0008061]; chitinase activity [GO:0004568]	Q9MA41	AT1G05850
A0A2K3L308	Trifolium	-0.405	0.607234	0.969	Unchanged	peptide-methionine (S)-S-oxide reductase (EC 1.8.4.11) (Peptide-methionine (S)-S-oxide reductase) (Protein-methionine-S-oxide reductase)	GO:0008113			peptide-methionine (S)-S-oxide reductase activity [GO:0008113]	Q9FKF7	AT5G61640
A0A2K3L316	Trifolium	0.349	0.409375	0.961	Unchanged	Annexin	GO:0005509; GO:0005544; GO:0006950	response to stress [GO:0006950]		calcium ion binding [GO:0005509]; calcium-dependent phospholipid binding [GO:0005544]	Q94CK4	AT5G12380
A0A2K3L330	Trifolium	-0.511	0.0412085	0.838	Unchanged	Oxysterol-binding protein 3c-like	GO:0008289			lipid binding [GO:0008289]	Q9LZM1	AT5G02100
A0A2K3L349	Trifolium	-0.569	0.373094	0.958	Unchanged	4-hydroxy-4-methyl-2-oxoglutarate aldolase (HMG aldolase) (EC 4.1.1.112) (EC 4.1.3.17) (Oxaloacetate decarboxylase)	GO:0008428; GO:0008948; GO:0046872; GO:0047443; GO:0051252	regulation of RNA metabolic process [GO:0051252]		4-hydroxy-4-methyl-2-oxoglutarate aldolase activity [GO:0047443]; metal ion binding [GO:0046872]; oxaloacetate decarboxylase activity [GO:0008948]; ribonuclease inhibitor activity [GO:0008428]	Q9FFE0	AT5G16450
A0A2K3L351	Trifolium	-0.142	0.609709	0.969	Unchanged	Transcription factor 25-like protein	GO:0005737		cytoplasm [GO:0005737]		O80734	AT2G46900
A0A2K3L364	Trifolium	0.272	0.659567	0.971	Unchanged	NAC domain-containing protein	GO:0003677; GO:0006355	regulation of DNA-templated transcription [GO:0006355]		DNA binding [GO:0003677]	Q93VY3	AT4G27410
A0A2K3L367	Trifolium	0.507	0.61269	0.969	Unchanged	Histone acetyltransferase GCN5-like protein	GO:0004402			histone acetyltransferase activity [GO:0004402]	Q9AR19	AT3G54610
A0A2K3L378	Trifolium	-0.663	0.182153	0.935	Unchanged	Peptidyl-prolyl cis-trans isomerase (PPIase) (EC 5.2.1.8)	GO:0003755; GO:0006457	protein folding [GO:0006457]		peptidyl-prolyl cis-trans isomerase activity [GO:0003755]	F4IX28	#N/A
A0A2K3L381	Trifolium	-1.31	0.0459824	0.849	Down-regulated	Presenilin (EC 3.4.23.-)	GO:0000139; GO:0005789; GO:0007219; GO:0016485; GO:0042500	Notch signaling pathway [GO:0007219]; protein processing [GO:0016485]	endoplasmic reticulum membrane [GO:0005789]; Golgi membrane [GO:0000139]	aspartic endopeptidase activity, intramembrane cleaving [GO:0042500]	Q9SIK7	AT2G29900
A0A2K3L391	Trifolium	-0.977	0.133624	0.922	Unchanged	Carnitinyl-CoA dehydratase-like protein					O04469	AT1G65520
A0A2K3L394	Trifolium	-0.278	0.546349	0.967	Unchanged	Large ribosomal subunit protein uL30m	GO:0003735; GO:0006412; GO:0015934	translation [GO:0006412]	large ribosomal subunit [GO:0015934]	structural constituent of ribosome [GO:0003735]	Q8L908	AT5G55140
A0A2K3L3A3	Trifolium	-0.104	0.846829	0.975	Unchanged	Omega-hydroxypalmitate O-feruloyl transferase-like protein	GO:0016740			transferase activity [GO:0016740]	F4JWW6	#N/A
A0A2K3L3B2	Trifolium	0.222	0.707787	0.972	Unchanged	Dephospho-CoA kinase	GO:0004140; GO:0005524; GO:0015937; GO:0016310	coenzyme A biosynthetic process [GO:0015937]; phosphorylation [GO:0016310]		ATP binding [GO:0005524]; dephospho-CoA kinase activity [GO:0004140]	Q9ZQH0	AT2G27490
A0A2K3L3B6	Trifolium	-0.762	0.360982	0.958	Unchanged	Tropinone reductase-like protein	GO:0016491			oxidoreductase activity [GO:0016491]	Q9LHT0	AT5G06060
A0A2K3L3B8	Trifolium	0.0712	0.708328	0.972	Unchanged	MHD domain-containing protein					Q9FKM4	AT5G57460
A0A2K3L3C6	Trifolium	-0.651	0.107166	0.91	Unchanged	Polygalacturonase	GO:0004650; GO:0005975	carbohydrate metabolic process [GO:0005975]		polygalacturonase activity [GO:0004650]	A0A1I9LS88	AT3G61490
A0A2K3L3I4	Trifolium	0.45	0.157264	0.929	Unchanged	F-box protein pp2-b1					Q9ZVQ6	AT2G02360
A0A2K3L3L0	Trifolium	-0.168	0.484034	0.965	Unchanged	Protein TONNEAU 1A-like	GO:0015630		microtubule cytoskeleton [GO:0015630]		Q9FQ24	AT3G55005
A0A2K3L3L6	Trifolium	-0.0967	0.708413	0.972	Unchanged	Tryptophan synthase beta chain 2 chloroplastic-like	GO:0016042; GO:0016787	lipid catabolic process [GO:0016042]		hydrolase activity [GO:0016787]	F4HX14	#N/A
A0A2K3L3M5	Trifolium	0.3	0.229337	0.944	Unchanged	Mitogen-activated protein kinase kinase 4-like protein	GO:0004674; GO:0005524; GO:0016310	phosphorylation [GO:0016310]		ATP binding [GO:0005524]; protein serine/threonine kinase activity [GO:0004674]	O80397	AT1G51660
A0A2K3L3N9	Trifolium	0.316	0.403125	0.96	Unchanged	Putative rRNA-processing protein EBP2	GO:0005730; GO:0042254	ribosome biogenesis [GO:0042254]	nucleolus [GO:0005730]		Q9LUJ5	AT3G22660
A0A2K3L3P6	Trifolium	0.598	0.362643	0.958	Unchanged	Ubiquitin carboxyl-terminal hydrolase (EC 3.4.19.12)	GO:0004843; GO:0006511	ubiquitin-dependent protein catabolic process [GO:0006511]		cysteine-type deubiquitinase activity [GO:0004843]	Q8GWE1	AT4G17510
A0A2K3L3P7	Trifolium	0.00227	0.997011	0.978	Unchanged	UDP-glucose 6-dehydrogenase (EC 1.1.1.22)	GO:0003979; GO:0006065; GO:0051287	UDP-glucuronate biosynthetic process [GO:0006065]		NAD binding [GO:0051287]; UDP-glucose 6-dehydrogenase activity [GO:0003979]	Q9LF33	AT5G15490
A0A2K3L3R1	Trifolium	-0.613	0.337017	0.956	Unchanged	Glutaredoxin-c6-like protein					Q8L9S3	AT4G33040
A0A2K3L3S0	Trifolium	-1.04	0.0423299	0.841	Down-regulated	Uncharacterized protein					F4JZV9	#N/A
A0A2K3L3S5	Trifolium	0.0305	0.952882	0.977	Unchanged	Putative serine-threonine protein plant-type					Q9FXA1	AT1G49750
A0A2K3L3S7	Trifolium	-0.543	0.430819	0.962	Unchanged	6,7-dimethyl-8-ribityllumazine synthase (DMRL synthase) (EC 2.5.1.78)	GO:0000906; GO:0009231; GO:0009349	riboflavin biosynthetic process [GO:0009231]	riboflavin synthase complex [GO:0009349]	6,7-dimethyl-8-ribityllumazine synthase activity [GO:0000906]	O80575	AT2G44050
A0A2K3L3T0	Trifolium	-0.309	0.359493	0.957	Unchanged	Ribosome biogenesis protein WDR12					Q9LF27	AT5G15550
A0A2K3L3U8	Trifolium	-1.73	0.0768753	0.89	Unchanged	Peroxisomal and mitochondrial division factor1	GO:0016020		membrane [GO:0016020]		Q9SHJ6	AT1G06530
A0A2K3L3Y8	Trifolium	-1.76	0.002512	0.489	Down-regulated	Protein TPlate-like	GO:0006897	endocytosis [GO:0006897]			F4J8D3	AT3G01780
A0A2K3L3Y9	Trifolium	0.411	0.395907	0.96	Unchanged	Cationic amino acid transporter vacuolar-like	GO:0016020; GO:0022857		membrane [GO:0016020]	transmembrane transporter activity [GO:0022857]	Q9SHH0	AT1G17120
A0A2K3L3Z3	Trifolium	-0.132	0.822965	0.975	Unchanged	WRKY transcription factor	GO:0003700; GO:0005634; GO:0043565		nucleus [GO:0005634]	DNA-binding transcription factor activity [GO:0003700]; sequence-specific DNA binding [GO:0043565]	A0A1P8BDI5	#N/A
A0A2K3L3Z7	Trifolium	-2.38	0.000551732	0.264	Down-regulated	Prostaglandin E synthase	GO:0016020		membrane [GO:0016020]		Q9FHX0	AT5G42150
A0A2K3L407	Trifolium	0.0711	0.912203	0.976	Unchanged	ATP synthase mitochondrial f1 complex assembly factor 1-like protein	GO:0005739; GO:0065003	protein-containing complex assembly [GO:0065003]	mitochondrion [GO:0005739]		O22958	AT2G34050
A0A2K3L411	Trifolium	-0.235	0.723463	0.973	Unchanged	NADP-dependent alkenal double bond reductase p1-like protein	GO:0016628			oxidoreductase activity, acting on the CH-CH group of donors, NAD or NADP as acceptor [GO:0016628]	Q9C677	#N/A
A0A2K3L415	Trifolium	-0.0988	0.687764	0.972	Unchanged	succinate--CoA ligase (ADP-forming) (EC 6.2.1.5)	GO:0006099; GO:0016874	tricarboxylic acid cycle [GO:0006099]		ligase activity [GO:0016874]	O82662	AT2G20420
A0A2K3L419	Trifolium	0.0853	0.772874	0.974	Unchanged	Rossmann-fold NAD(P)-binding domain protein	GO:0008641			ubiquitin-like modifier activating enzyme activity [GO:0008641]	A8MS56	AT5G37530
A0A2K3L420	Trifolium	0.0259	0.973469	0.977	Unchanged	Esterase ydii					Q9SX65	AT1G48320
A0A2K3L428	Trifolium	-0.217	0.790403	0.974	Unchanged	60S ribosomal protein l38-like	GO:0003735; GO:0005840; GO:0006412; GO:1990904	translation [GO:0006412]	ribonucleoprotein complex [GO:1990904]; ribosome [GO:0005840]	structural constituent of ribosome [GO:0003735]	O22860	AT3G59540
A0A2K3L458	Trifolium	0.452	0.31596	0.954	Unchanged	Acetolactate synthase (EC 2.2.1.6)	GO:0000287; GO:0003984; GO:0009097; GO:0009099; GO:0009635; GO:0030976; GO:0050660	isoleucine biosynthetic process [GO:0009097]; response to herbicide [GO:0009635]; valine biosynthetic process [GO:0009099]		acetolactate synthase activity [GO:0003984]; flavin adenine dinucleotide binding [GO:0050660]; magnesium ion binding [GO:0000287]; thiamine pyrophosphate binding [GO:0030976]	P17597	AT3G48560
A0A2K3L461	Trifolium	0.688	0.110994	0.912	Unchanged	Vacuolar sorting-associated protein 4B-like	GO:0005524; GO:0016887			ATP binding [GO:0005524]; ATP hydrolysis activity [GO:0016887]	Q9ZNT0	AT2G27600
A0A2K3L464	Trifolium	0.101	0.80325	0.974	Unchanged	Stress responsive A/B barrel domain protein					Q9SIP1	AT2G31670
A0A2K3L465	Trifolium	-0.291	0.336723	0.956	Unchanged	Purple acid phosphatase (EC 3.1.3.2)	GO:0003993; GO:0005576; GO:0046872		extracellular region [GO:0005576]	acid phosphatase activity [GO:0003993]; metal ion binding [GO:0046872]	A0A1P8BA48	#N/A
A0A2K3L476	Trifolium	-1.26	0.0660342	0.879	Unchanged	Golgin candidate 6-like protein	GO:0005794; GO:0006886; GO:0016192	intracellular protein transport [GO:0006886]; vesicle-mediated transport [GO:0016192]	Golgi apparatus [GO:0005794]		B0F9L4	AT3G27530
A0A2K3L479	Trifolium	0.932	0.0569535	0.868	Unchanged	Transcription elongation factor SPT5 1-like protein	GO:0003682; GO:0003723; GO:0003746; GO:0005654; GO:0006306; GO:0006357; GO:0030422; GO:0032784; GO:0080188	DNA methylation [GO:0006306]; gene silencing by RNA-directed DNA methylation [GO:0080188]; regulation of DNA-templated transcription elongation [GO:0032784]; regulation of transcription by RNA polymerase II [GO:0006357]; siRNA processing [GO:0030422]	nucleoplasm [GO:0005654]	chromatin binding [GO:0003682]; RNA binding [GO:0003723]; translation elongation factor activity [GO:0003746]	A0A1P8BFP7	#N/A
A0A2K3L483	Trifolium	0.796	0.0246062	0.779	Up-regulated	peroxidase (EC 1.11.1.7)	GO:0006979; GO:0020037; GO:0042744; GO:0046872; GO:0140825	hydrogen peroxide catabolic process [GO:0042744]; response to oxidative stress [GO:0006979]		heme binding [GO:0020037]; lactoperoxidase activity [GO:0140825]; metal ion binding [GO:0046872]	Q9FLC0	AT5G05340
A0A2K3L491	Trifolium	-0.0436	0.878421	0.976	Unchanged	Branchpoint-bridging protein	GO:0000398; GO:0005681; GO:0008270; GO:0045131	mRNA splicing, via spliceosome [GO:0000398]	spliceosomal complex [GO:0005681]	pre-mRNA branch point binding [GO:0045131]; zinc ion binding [GO:0008270]	Q9LU44	AT5G51300
A0A2K3L4B3	Trifolium	-0.688	0.247832	0.946	Unchanged	Parafibromin-like protein	GO:0006368; GO:0016593	transcription elongation by RNA polymerase II [GO:0006368]	Cdc73/Paf1 complex [GO:0016593]		Q9LJ87	AT3G22590
A0A2K3L4B4	Trifolium	-0.0167	0.972782	0.977	Unchanged	glutathione transferase (EC 2.5.1.18)	GO:0016740			transferase activity [GO:0016740]	O80852	AT2G30860
A0A2K3L4C8	Trifolium	0.591	0.15409	0.928	Unchanged	Protein SCAI-like	GO:0003714; GO:0006351	DNA-templated transcription [GO:0006351]		transcription corepressor activity [GO:0003714]	Q94BN1	#N/A
A0A2K3L4C9	Trifolium	0.496	0.0377498	0.829	Unchanged	40S ribosomal protein s15a-1-like	GO:0003735; GO:0005840; GO:0006412; GO:1990904	translation [GO:0006412]	ribonucleoprotein complex [GO:1990904]; ribosome [GO:0005840]	structural constituent of ribosome [GO:0003735]	P42798	AT5G59850
A0A2K3L4E2	Trifolium	0.309	0.700361	0.972	Unchanged	Linoleate 13s-lipoxygenase 3-1 chloroplastic-like	GO:0005737		cytoplasm [GO:0005737]		Q9LNR3	AT1G17420
A0A2K3L4F5	Trifolium	-0.117	0.793514	0.974	Unchanged	Small ribosomal subunit protein S13 mitochondrial-like	GO:0003723; GO:0003735; GO:0005840; GO:0006412; GO:1990904	translation [GO:0006412]	ribonucleoprotein complex [GO:1990904]; ribosome [GO:0005840]	RNA binding [GO:0003723]; structural constituent of ribosome [GO:0003735]	P42732	AT5G14320
A0A2K3L4I2	Trifolium	0.539	0.128697	0.92	Unchanged	Pleckstrin homology domain-containing protein					A0A1P8AMQ8	#N/A
A0A2K3L4K0	Trifolium	0.0792	0.649043	0.971	Unchanged	Protein TOC75 chloroplastic-like					Q9STE8	AT3G46740
A0A2K3L4K1	Trifolium	0.411	0.138193	0.923	Unchanged	MtN19 protein					Q8VZ21	AT5G61820
A0A2K3L4M4	Trifolium	-0.132	0.769826	0.974	Unchanged	Serine-rich adhesin for platelets-like protein	GO:0046872			metal ion binding [GO:0046872]	F4KE59	AT5G16680
A0A2K3L4P3	Trifolium	-2.47	0.00281843	0.504	Down-regulated	Transcription factor bZIP63					F4I9R1	AT1G58110
A0A2K3L4Q8	Trifolium	-0.138	0.783166	0.974	Unchanged	Stress up-regulated Nod 19 protein					Q8VZ21	AT5G61820
A0A2K3L4R4	Trifolium	-0.798	0.0108626	0.672	Down-regulated	Syntaxin-121-like protein	GO:0005484; GO:0006886; GO:0016020; GO:0016192	intracellular protein transport [GO:0006886]; vesicle-mediated transport [GO:0016192]	membrane [GO:0016020]	SNAP receptor activity [GO:0005484]	Q9ZSD4	AT3G11820
A0A2K3L4R7	Trifolium	-0.0965	0.878312	0.976	Unchanged	isoleucine--tRNA ligase (EC 6.1.1.5) (Isoleucyl-tRNA synthetase)	GO:0002161; GO:0004822; GO:0005524; GO:0006428	isoleucyl-tRNA aminoacylation [GO:0006428]		aminoacyl-tRNA editing activity [GO:0002161]; ATP binding [GO:0005524]; isoleucine-tRNA ligase activity [GO:0004822]	F4K4Q2	#N/A
A0A2K3L4Y6	Trifolium	0.012	0.976806	0.978	Unchanged	2-oxoadipate dioxygenase/decarboxylase (EC 1.13.11.93) (2-hydroxyglutarate synthase)	GO:0051213			dioxygenase activity [GO:0051213]	Q9LMJ7	AT1G07040
A0A2K3L4Z2	Trifolium	-1.31	0.103558	0.908	Unchanged	PCI domain-containing protein 2-like	GO:0016973	poly(A)+ mRNA export from nucleus [GO:0016973]			Q8GWE6	AT2G19560
A0A2K3L4Z9	Trifolium	-2.25	0.00338386	0.525	Down-regulated	Cationic amino acid transporter	GO:0016020; GO:0022857		membrane [GO:0016020]	transmembrane transporter activity [GO:0022857]	Q84MA5	AT4G21120
A0A2K3L502	Trifolium	-0.559	0.108972	0.911	Unchanged	Cellulose synthase-like protein h1	GO:0016020; GO:0016760; GO:0030244	cellulose biosynthetic process [GO:0030244]	membrane [GO:0016020]	cellulose synthase (UDP-forming) activity [GO:0016760]	O80891	AT2G32540
A0A2K3L509	Trifolium	-0.614	0.0764809	0.89	Unchanged	PPM-type phosphatase domain-containing protein	GO:0004722			protein serine/threonine phosphatase activity [GO:0004722]	Q9S9Z7	AT1G34750
A0A2K3L527	Trifolium	0.644	0.251448	0.947	Unchanged	E3 ubiquitin-protein ligase RNF170 (RING finger protein 170) (RING-type E3 ubiquitin transferase RNF170)	GO:0016020; GO:0046872; GO:0061630		membrane [GO:0016020]	metal ion binding [GO:0046872]; ubiquitin protein ligase activity [GO:0061630]	Q93WJ5	#N/A
A0A2K3L539	Trifolium	0.488	0.340144	0.956	Unchanged	Transferring glycosyl group transferase	GO:0016740			transferase activity [GO:0016740]	Q8L9Q7	AT3G23760
A0A2K3L541	Trifolium	0.129	0.613594	0.969	Unchanged	MACPF domain-containing protein at4g24290-like protein	GO:0006952; GO:0012501; GO:2000031	defense response [GO:0006952]; programmed cell death [GO:0012501]; regulation of salicylic acid mediated signaling pathway [GO:2000031]			Q9STW5	AT4G24290
A0A2K3L546	Trifolium	0.026	0.930623	0.977	Unchanged	Vesicle-associated protein 4-2-like					Q8VYN2	AT4G21450
A0A2K3L547	Trifolium	-1.01	0.103592	0.908	Unchanged	Copper transport protein	GO:0005375; GO:0016020		membrane [GO:0016020]	copper ion transmembrane transporter activity [GO:0005375]	Q93VM8	AT5G20650
A0A2K3L572	Trifolium	0.709	0.0621012	0.874	Unchanged	Trichome birefringence-like C-terminal domain-containing protein	GO:0016413			O-acetyltransferase activity [GO:0016413]	Q8VY22	AT1G29050
A0A2K3L5A1	Trifolium	-0.0929	0.705446	0.972	Unchanged	Isoleucine-tRNA ligase cytoplasmic-like	GO:0004822; GO:0005524; GO:0006418; GO:0009791; GO:0048608	post-embryonic development [GO:0009791]; reproductive structure development [GO:0048608]; tRNA aminoacylation for protein translation [GO:0006418]		ATP binding [GO:0005524]; isoleucine-tRNA ligase activity [GO:0004822]	F4JLM5	AT4G10320
A0A2K3L5A9	Trifolium	0.0288	0.940718	0.977	Unchanged	Septum site-determining protein MinD chloroplastic-like	GO:0005524			ATP binding [GO:0005524]	Q9MBA2	AT5G24020
A0A2K3L5B4	Trifolium	-1.04	0.0112953	0.675	Down-regulated	ABC transporter C family member 8-like protein	GO:0005524; GO:0016887			ATP binding [GO:0005524]; ATP hydrolysis activity [GO:0016887]	A0A1I9LPV3	#N/A
A0A2K3L5C3	Trifolium	0.0944	0.686317	0.972	Unchanged	Coatomer subunit delta	GO:0000139; GO:0006890; GO:0015031; GO:0030126	protein transport [GO:0015031]; retrograde vesicle-mediated transport, Golgi to endoplasmic reticulum [GO:0006890]	COPI vesicle coat [GO:0030126]; Golgi membrane [GO:0000139]		Q93Y22	AT5G05010
A0A2K3L5D1	Trifolium	-0.255	0.383979	0.959	Unchanged	Protein FAM63A	GO:0004843; GO:1990380			cysteine-type deubiquitinase activity [GO:0004843]; K48-linked deubiquitinase activity [GO:1990380]	Q8LE63	AT4G11860
A0A2K3L5D7	Trifolium	0.255	0.285431	0.951	Unchanged	Oberon-like PHD finger domain-containing protein	GO:0005634		nucleus [GO:0005634]		Q8VZE5	#N/A
A0A2K3L5I7	Trifolium	-0.116	0.83303	0.975	Unchanged	Defective in cullin neddylation protein					Q7XJ64	AT1G15860
A0A2K3L5I9	Trifolium	-0.14	0.797269	0.974	Unchanged	Protein trichome birefringence-like 39	GO:0016413			O-acetyltransferase activity [GO:0016413]	Q9SIN2	AT2G42570
A0A2K3L5M1	Trifolium	-0.565	0.104098	0.909	Unchanged	Cytochrome p450	GO:0004497; GO:0005506; GO:0016020; GO:0016705; GO:0020037		membrane [GO:0016020]	heme binding [GO:0020037]; iron ion binding [GO:0005506]; monooxygenase activity [GO:0004497]; oxidoreductase activity, acting on paired donors, with incorporation or reduction of molecular oxygen [GO:0016705]	P58049	AT5G25120
A0A2K3L5N0	Trifolium	-0.014	0.962779	0.977	Unchanged	Glutelin type-A	GO:0045735			nutrient reservoir activity [GO:0045735]	Q9LQQ3	AT1G07750
A0A2K3L5N2	Trifolium	1.46	0.0231075	0.77	Up-regulated	TBCC domain-containing protein 1-like					Q940S9	#N/A
A0A2K3L5N9	Trifolium	0.287	0.371629	0.958	Unchanged	Gamma-glutamyl hydrolase-like protein	GO:0008242			omega peptidase activity [GO:0008242]	Q9SYL6	AT1G78660
A0A2K3L5P6	Trifolium	-0.0695	0.789755	0.974	Unchanged	D-3-phosphoglycerate dehydrogenase chloroplastic-like	GO:0016491			oxidoreductase activity [GO:0016491]	O49485	AT4G34200
A0A2K3L5R6	Trifolium	-2.58	0.00215676	0.468	Down-regulated	Seed lipoxygenase	GO:0005737; GO:0006633; GO:0016702; GO:0031408; GO:0034440; GO:0046872	fatty acid biosynthetic process [GO:0006633]; lipid oxidation [GO:0034440]; oxylipin biosynthetic process [GO:0031408]	cytoplasm [GO:0005737]	metal ion binding [GO:0046872]; oxidoreductase activity, acting on single donors with incorporation of molecular oxygen, incorporation of two atoms of oxygen [GO:0016702]	Q06327	AT1G55020
A0A2K3L5S8	Trifolium	-0.459	0.673707	0.971	Unchanged	Exocyst subunit Exo70 family protein	GO:0000145; GO:0005546; GO:0005829; GO:0006887; GO:0015031	exocytosis [GO:0006887]; protein transport [GO:0015031]	cytosol [GO:0005829]; exocyst [GO:0000145]	phosphatidylinositol-4,5-bisphosphate binding [GO:0005546]	F4K8Y6	AT5G50380
A0A2K3L5U1	Trifolium	-0.0951	0.872009	0.976	Unchanged	Alpha/beta fold hydrolase	GO:0016020; GO:0016787		membrane [GO:0016020]	hydrolase activity [GO:0016787]	Q9STM1	#N/A
A0A2K3L5U4	Trifolium	-3	0.00297955	0.51	Down-regulated	Momilactone A synthase-like protein	GO:0016616			oxidoreductase activity, acting on the CH-OH group of donors, NAD or NADP as acceptor [GO:0016616]	Q9C826	AT1G52340
A0A2K3L5U5	Trifolium	0.296	0.534996	0.967	Unchanged	Alphavirus core protein family	GO:0031969		chloroplast membrane [GO:0031969]		Q9C9Z2	AT3G08640
A0A2K3L5U7	Trifolium	-1.7	0.00257952	0.493	Down-regulated	40S ribosomal protein S25	GO:0005840; GO:1990904		ribonucleoprotein complex [GO:1990904]; ribosome [GO:0005840]		Q9T029	AT4G39200
A0A2K3L5W7	Trifolium	0.811	0.0992232	0.906	Unchanged	UDP-glucuronate 4-epimerase 1-like protein	GO:0016020		membrane [GO:0016020]		Q9M0B6	AT4G30440
A0A2K3L5X0	Trifolium	-0.077	0.791333	0.974	Unchanged	Protoporphyrinogen oxidase chloroplastic-like	GO:0016491			oxidoreductase activity [GO:0016491]	P55826	AT4G01690
A0A2K3L5Y0	Trifolium	-1.55	0.0192529	0.744	Down-regulated	Putative plastid-lipid-associated protein chloroplastic-like					Q9LW57	AT3G23400
A0A2K3L5Y1	Trifolium	-0.687	0.367791	0.958	Unchanged	LRR receptor-like kinase resistance protein	GO:0016301; GO:0016310	phosphorylation [GO:0016310]		kinase activity [GO:0016301]	Q9SHU4	AT2G15320
A0A2K3L5Z5	Trifolium	1.23	0.0769148	0.89	Unchanged	glucan endo-1,3-beta-D-glucosidase (EC 3.2.1.39) ((1->3)-beta-glucan endohydrolase) (Beta-1,3-endoglucanase)	GO:0005975; GO:0042973	carbohydrate metabolic process [GO:0005975]		glucan endo-1,3-beta-D-glucosidase activity [GO:0042973]	Q94CD8	AT3G13560
A0A2K3L606	Trifolium	0.0282	0.943357	0.977	Unchanged	Long chain acyl-CoA synthetase 4-like protein					Q9T0A0	AT4G23850
A0A2K3L612	Trifolium	0.231	0.712627	0.972	Unchanged	U3 small nucleolar RNA-interacting protein 2-like	GO:0034511			U3 snoRNA binding [GO:0034511]	Q9M0V4	AT4G05410
A0A2K3L615	Trifolium	0.61	0.107388	0.91	Unchanged	(+)-neomenthol dehydrogenase	GO:0016491			oxidoreductase activity [GO:0016491]	Q9M2E2	AT3G61220
A0A2K3L621	Trifolium	-0.496	0.0773252	0.89	Unchanged	Calreticulin-3-like protein	GO:0005509; GO:0005783; GO:0006457; GO:0030246; GO:0051082	protein folding [GO:0006457]	endoplasmic reticulum [GO:0005783]	calcium ion binding [GO:0005509]; carbohydrate binding [GO:0030246]; unfolded protein binding [GO:0051082]	O04153	AT1G08450
A0A2K3L623	Trifolium	-0.628	0.0446717	0.846	Down-regulated	Ribosomal protein L37	GO:0003735; GO:0005840; GO:0006412; GO:0019843; GO:0046872; GO:1990904	translation [GO:0006412]	ribonucleoprotein complex [GO:1990904]; ribosome [GO:0005840]	metal ion binding [GO:0046872]; rRNA binding [GO:0019843]; structural constituent of ribosome [GO:0003735]	Q8LEM8	AT3G16080
A0A2K3L625	Trifolium	0.88	0.00706119	0.628	Up-regulated	Zeatin O-glucosyltransferase-like protein	GO:0008194; GO:0071704	organic substance metabolic process [GO:0071704]		UDP-glycosyltransferase activity [GO:0008194]	O22820	AT2G43840
A0A2K3L641	Trifolium	0.556	0.138185	0.923	Unchanged	FRIGIDA-like protein	GO:0009908; GO:0030154	cell differentiation [GO:0030154]; flower development [GO:0009908]			Q67ZB3	AT5G48385
A0A2K3L653	Trifolium	0.641	0.274978	0.95	Unchanged	Methylglutaconyl-CoA hydratase mitochondrial-like					F4JML5	AT4G16800
A0A2K3L655	Trifolium	-0.644	0.0740501	0.887	Unchanged	Putative acyl-activating enzyme peroxisomal-like	GO:0005829		cytosol [GO:0005829]		Q9FFE6	AT5G16370
A0A2K3L657	Trifolium	0.0513	0.890779	0.976	Unchanged	Ras-related protein RABB1c-like	GO:0003924; GO:0005525			GTP binding [GO:0005525]; GTPase activity [GO:0003924]	P92963	AT4G17170
A0A2K3L689	Trifolium	-0.7	0.0822578	0.894	Unchanged	allene-oxide cyclase (EC 5.3.99.6)	GO:0009507; GO:0009695; GO:0046423	jasmonic acid biosynthetic process [GO:0009695]	chloroplast [GO:0009507]	allene-oxide cyclase activity [GO:0046423]	Q93ZC5	AT1G13280
A0A2K3L695	Trifolium	0.0119	0.982048	0.978	Unchanged	SNAP25-like protein	GO:0005484; GO:0031201		SNARE complex [GO:0031201]	SNAP receptor activity [GO:0005484]	Q9S7P9	AT5G61210
A0A2K3L699	Trifolium	-0.279	0.224942	0.943	Unchanged	60S ribosomal protein L7a	GO:0003723; GO:0022625; GO:0042254	ribosome biogenesis [GO:0042254]	cytosolic large ribosomal subunit [GO:0022625]	RNA binding [GO:0003723]	Q9LZH9	AT3G62870
A0A2K3L6A3	Trifolium	-0.923	0.0346542	0.82	Down-regulated	L-ascorbate oxidase	GO:0005507; GO:0016491			copper ion binding [GO:0005507]; oxidoreductase activity [GO:0016491]	F4K6Z6	AT5G21105
A0A2K3L6A4	Trifolium	-0.908	0.240684	0.945	Unchanged	Pathogen-inducible alpha-dioxygenase	GO:0004601; GO:0006633; GO:0006979; GO:0020037; GO:0051213	fatty acid biosynthetic process [GO:0006633]; response to oxidative stress [GO:0006979]		dioxygenase activity [GO:0051213]; heme binding [GO:0020037]; peroxidase activity [GO:0004601]	Q9SGH6	AT3G01420
A0A2K3L6A9	Trifolium	-0.903	0.0212456	0.758	Down-regulated	Heat shock protein 70 kDa	GO:0005524; GO:0140662			ATP binding [GO:0005524]; ATP-dependent protein folding chaperone [GO:0140662]	A0A2H1ZEG9	#N/A
A0A2K3L6C1	Trifolium	0.122	0.768785	0.974	Unchanged	Uncharacterized protein					A8MS11	AT1G73350
A0A2K3L6D1	Trifolium	0.664	0.154355	0.928	Unchanged	Putative peroxisomal membrane protein PEX13-like	GO:0006952	defense response [GO:0006952]			Q5PNU6	#N/A
A0A2K3L6D4	Trifolium	0.0417	0.89029	0.976	Unchanged	Plasma membrane H+-ATPase	GO:0005524; GO:0016020; GO:0016887		membrane [GO:0016020]	ATP binding [GO:0005524]; ATP hydrolysis activity [GO:0016887]	Q9LV11	AT5G62670
A0A2K3L6D5	Trifolium	-1.14	0.055473	0.865	Unchanged	Actin-97-like protein	GO:0005524; GO:0005856		cytoskeleton [GO:0005856]	ATP binding [GO:0005524]	P53496	AT3G12110
A0A2K3L6E0	Trifolium	-0.381	0.552919	0.967	Unchanged	Glycosyltransferase (EC 2.4.1.-)	GO:0035251			UDP-glucosyltransferase activity [GO:0035251]	Q9LVR1	AT5G66690
A0A2K3L6F2	Trifolium	0.102	0.776811	0.974	Unchanged	Adenylyl cyclase-associated protein	GO:0003779; GO:0007010	cytoskeleton organization [GO:0007010]		actin binding [GO:0003779]	O65902	AT4G34490
A0A2K3L6F4	Trifolium	0.398	0.561399	0.968	Unchanged	Cytochrome p450 82a3-like protein	GO:0004497; GO:0005506; GO:0016020; GO:0016705; GO:0020037		membrane [GO:0016020]	heme binding [GO:0020037]; iron ion binding [GO:0005506]; monooxygenase activity [GO:0004497]; oxidoreductase activity, acting on paired donors, with incorporation or reduction of molecular oxygen [GO:0016705]	Q9SZ46	AT4G31940
A0A2K3L6H5	Trifolium	0.101	0.875289	0.976	Unchanged	phosphoethanolamine N-methyltransferase (EC 2.1.1.103)	GO:0006807; GO:0008168; GO:0032259; GO:0044249; GO:1901576	cellular biosynthetic process [GO:0044249]; methylation [GO:0032259]; nitrogen compound metabolic process [GO:0006807]; organic substance biosynthetic process [GO:1901576]		methyltransferase activity [GO:0008168]	Q9FR44	AT3G18000
A0A2K3L6I5	Trifolium	0.0302	0.959536	0.977	Unchanged	Dynamin-related protein 3a-like	GO:0003924; GO:0005525			GTP binding [GO:0005525]; GTPase activity [GO:0003924]	F4JJ15	#N/A
A0A2K3L6I6	Trifolium	0.596	0.339368	0.956	Unchanged	peptidylprolyl isomerase (EC 5.2.1.8)	GO:0003755			peptidyl-prolyl cis-trans isomerase activity [GO:0003755]	Q38931	AT3G25230
A0A2K3L6J4	Trifolium	0.0161	0.923965	0.977	Unchanged	Protein SEC13	GO:0005198; GO:0015031	protein transport [GO:0015031]		structural molecule activity [GO:0005198]	O64740	AT2G30050
A0A2K3L6K2	Trifolium	0.505	0.370453	0.958	Unchanged	Multiple inositol polyphosphate phosphatase 1-like protein					Q941B2	AT1G09870
A0A2K3L6K9	Trifolium	-0.0762	0.715659	0.972	Unchanged	Microtubule-associated TORTIFOLIA-like protein	GO:0005874; GO:0008017		microtubule [GO:0005874]	microtubule binding [GO:0008017]	Q9T041	AT4G27060
A0A2K3L6L0	Trifolium	-1.13	0.0163602	0.721	Down-regulated	isopentenyl-diphosphate Delta-isomerase (EC 5.3.3.2)	GO:0004452; GO:0008299; GO:0015995; GO:0050992	chlorophyll biosynthetic process [GO:0015995]; dimethylallyl diphosphate biosynthetic process [GO:0050992]; isoprenoid biosynthetic process [GO:0008299]		isopentenyl-diphosphate delta-isomerase activity [GO:0004452]	A0A1I9LM15	#N/A
A0A2K3L6L6	Trifolium	-1.01	0.100555	0.907	Unchanged	Aquaporin pip2-7-like protein	GO:0015267; GO:0016020		membrane [GO:0016020]	channel activity [GO:0015267]	A0A1P8AYA1	#N/A
A0A2K3L6L9	Trifolium	0.852	0.107877	0.911	Unchanged	Rhamnose biosynthetic-like enzyme	GO:0008460; GO:0009225	nucleotide-sugar metabolic process [GO:0009225]		dTDP-glucose 4,6-dehydratase activity [GO:0008460]	Q9SYM5	AT1G78570
A0A2K3L6M3	Trifolium	-0.421	0.22308	0.943	Unchanged	P-loop nucleoside triphosphate hydrolase superfamily protein	GO:0016787			hydrolase activity [GO:0016787]	A0A178VWR3	#N/A
A0A2K3L6N5	Trifolium	0.00285	0.99614	0.978	Unchanged	DUF641 domain-containing protein	GO:0009639; GO:0009959	negative gravitropism [GO:0009959]; response to red or far red light [GO:0009639]			Q2V3V8	AT3G14870
A0A2K3L6P4	Trifolium	-2.15	0.00222617	0.473	Down-regulated	Transport protein SEC31A-like	GO:0005737; GO:0006888	endoplasmic reticulum to Golgi vesicle-mediated transport [GO:0006888]	cytoplasm [GO:0005737]		F4J110	#N/A
A0A2K3L6P9	Trifolium	-1.91	0.0740395	0.887	Unchanged	Gem-like protein 5-like					Q9LYV6	AT5G13200
A0A2K3L6Q5	Trifolium	0.471	0.136146	0.923	Unchanged	Myosin-2 heavy chain-like protein	GO:0003924; GO:0005525			GTP binding [GO:0005525]; GTPase activity [GO:0003924]	F4KG14	AT5G46070
A0A2K3L6R1	Trifolium	-0.396	0.201042	0.939	Unchanged	Indole-3-acetic acid-amido synthetase					O81829	AT4G27260
A0A2K3L6R9	Trifolium	-0.175	0.333069	0.955	Unchanged	2-oxoglutarate dehydrogenase mitochondrial-like	GO:0004591; GO:0006099; GO:0030976	tricarboxylic acid cycle [GO:0006099]		oxoglutarate dehydrogenase (succinyl-transferring) activity [GO:0004591]; thiamine pyrophosphate binding [GO:0030976]	Q9FLH2	AT5G65750
A0A2K3L6T0	Trifolium	-0.2	0.64758	0.971	Unchanged	KTEL motif-containing protein					Q9FF95	AT5G23850
A0A2K3L6T1	Trifolium	-0.309	0.438882	0.962	Unchanged	GDP-D-mannose-3,5-epimerase	GO:0047918; GO:0051287			GDP-mannose 3,5-epimerase activity [GO:0047918]; NAD binding [GO:0051287]	Q93VR3	AT5G28840
A0A2K3L6T2	Trifolium	-1.75	0.0249457	0.78	Down-regulated	PTI1-like tyrosine-protein kinase	GO:0004672; GO:0005524; GO:0016310; GO:0050896	phosphorylation [GO:0016310]; response to stimulus [GO:0050896]		ATP binding [GO:0005524]; protein kinase activity [GO:0004672]	Q8LDB7	#N/A
A0A2K3L6T6	Trifolium	0.81	0.115224	0.914	Unchanged	Nodulin-26	GO:0015267; GO:0016020		membrane [GO:0016020]	channel activity [GO:0015267]	P25818	AT2G36830
A0A2K3L6U8	Trifolium	0.032	0.859938	0.976	Unchanged	AmmeMemoRadiSam system protein B					Q9SIR5	AT2G25280
A0A2K3L6V2	Trifolium	-0.0437	0.788057	0.974	Unchanged	40S ribosomal protein s2-4-like	GO:0003723; GO:0003735; GO:0006412; GO:0015935	translation [GO:0006412]	small ribosomal subunit [GO:0015935]	RNA binding [GO:0003723]; structural constituent of ribosome [GO:0003735]	Q9SCM3	AT3G57490
A0A2K3L6V9	Trifolium	-0.212	0.771551	0.974	Unchanged	Heat shock protein 70 kDa	GO:0005524; GO:0140662			ATP binding [GO:0005524]; ATP-dependent protein folding chaperone [GO:0140662]	Q9LHA8	AT3G12580
A0A2K3L6W1	Trifolium	0.321	0.556681	0.968	Unchanged	Alanine-glyoxylate aminotransferase 2 mitochondrial-like	GO:0008483; GO:0030170			pyridoxal phosphate binding [GO:0030170]; transaminase activity [GO:0008483]	A0A1I9LPN6	#N/A
A0A2K3L6W4	Trifolium	-0.595	0.185587	0.936	Unchanged	Altered inheritance of mitochondria protein 32-like					Q8LFZ9	AT4G26620
A0A2K3L6W7	Trifolium	0.514	0.132482	0.921	Unchanged	26S protease regulatory subunit 6b	GO:0000502; GO:0005524; GO:0006508; GO:0008233; GO:0016887	proteolysis [GO:0006508]	proteasome complex [GO:0000502]	ATP binding [GO:0005524]; ATP hydrolysis activity [GO:0016887]; peptidase activity [GO:0008233]	Q9SEI4	AT5G58290
A0A2K3L6X2	Trifolium	-0.802	0.00949579	0.659	Down-regulated	Respiratory burst oxidase protein B-like	GO:0004601; GO:0050664			oxidoreductase activity, acting on NAD(P)H, oxygen as acceptor [GO:0050664]; peroxidase activity [GO:0004601]	O81210	AT5G51060
A0A2K3L6X3	Trifolium	-0.64	0.00554334	0.597	Down-regulated	Acetyl-CoA acetyltransferase cytosolic 2-like protein	GO:0003985			acetyl-CoA C-acetyltransferase activity [GO:0003985]	Q9FIK7	AT5G47720
A0A2K3L6X8	Trifolium	-1.5	0.0603177	0.872	Unchanged	cytochrome-b5 reductase (EC 1.6.2.2)	GO:0005739; GO:0009703		mitochondrion [GO:0005739]	nitrate reductase (NADH) activity [GO:0009703]	P83291	AT5G20080
A0A2K3L6Y2	Trifolium	-2.42	0.0160949	0.719	Down-regulated	Tetraketide alpha-pyrone reductase 2-like protein	GO:0016491			oxidoreductase activity [GO:0016491]	Q9CA28	AT1G68540
A0A2K3L6Y8	Trifolium	-0.542	0.508347	0.966	Unchanged	Receptor-like protein kinase	GO:0016301; GO:0016310	phosphorylation [GO:0016310]		kinase activity [GO:0016301]	Q9C8I6	AT1G51800
A0A2K3L6Z6	Trifolium	0.186	0.744004	0.973	Unchanged	tRNA-dihydrouridine(16/17) synthase (NAD(P)(+))-like protein					Q9FH91	AT5G67220
A0A2K3L700	Trifolium	0.0265	0.897249	0.976	Unchanged	Tubulin-tyrosine ligase-like protein 12-like	GO:0016874			ligase activity [GO:0016874]	Q6IDC7	AT1G77550
A0A2K3L702	Trifolium	0.716	0.10887	0.911	Unchanged	Suppressor of auxin resistance 1 protein	GO:0005643; GO:0006913; GO:0033036; GO:0043170; GO:0071702; GO:0071705	macromolecule localization [GO:0033036]; macromolecule metabolic process [GO:0043170]; nitrogen compound transport [GO:0071705]; nucleocytoplasmic transport [GO:0006913]; organic substance transport [GO:0071702]	nuclear pore [GO:0005643]		Q9C811	AT1G33410
A0A2K3L706	Trifolium	-1.27	0.00352985	0.53	Down-regulated	60S acidic ribosomal protein p1-like	GO:0003735; GO:0005840; GO:0006414; GO:1990904	translational elongation [GO:0006414]	ribonucleoprotein complex [GO:1990904]; ribosome [GO:0005840]	structural constituent of ribosome [GO:0003735]	Q9FLV1	AT5G24510
A0A2K3L724	Trifolium	0.0544	0.880707	0.976	Unchanged	Calcium-transporting ATPase plasma membrane-type-like protein	GO:0005524; GO:0016020; GO:0016887		membrane [GO:0016020]	ATP binding [GO:0005524]; ATP hydrolysis activity [GO:0016887]	Q9LF79	AT5G57110
A0A2K3L735	Trifolium	-0.189	0.736748	0.973	Unchanged	Isoflavone reductase-like protein	GO:0009807	lignan biosynthetic process [GO:0009807]			P52577	AT1G75280
A0A2K3L742	Trifolium	-1.1	0.0158149	0.716	Down-regulated	40S ribosomal protein S26	GO:0003735; GO:0005840; GO:0006412; GO:1990904	translation [GO:0006412]	ribonucleoprotein complex [GO:1990904]; ribosome [GO:0005840]	structural constituent of ribosome [GO:0003735]	P49206	AT2G40590
A0A2K3L756	Trifolium	0.526	0.538625	0.967	Unchanged	DNA polymerase v-like protein	GO:0003677; GO:0005730; GO:0006355	regulation of DNA-templated transcription [GO:0006355]	nucleolus [GO:0005730]	DNA binding [GO:0003677]	Q9FGF4	AT5G64420
A0A2K3L775	Trifolium	0.231	0.498251	0.965	Unchanged	glutamine--fructose-6-phosphate transaminase (isomerizing) (EC 2.6.1.16)	GO:0004360; GO:0006541; GO:0097367; GO:1901135	carbohydrate derivative metabolic process [GO:1901135]; glutamine metabolic process [GO:0006541]		carbohydrate derivative binding [GO:0097367]; glutamine-fructose-6-phosphate transaminase (isomerizing) activity [GO:0004360]	Q9LIP9	AT3G24090
A0A2K3L783	Trifolium	-0.154	0.627475	0.97	Unchanged	Caffeic acid 3-O-methyltransferase-like protein	GO:0008171; GO:0008757; GO:0032259	methylation [GO:0032259]		O-methyltransferase activity [GO:0008171]; S-adenosylmethionine-dependent methyltransferase activity [GO:0008757]	Q9SCP7	AT3G53140
A0A2K3L792	Trifolium	0.108	0.582125	0.968	Unchanged	Putative calcium-binding protein					F4HY32	AT1G21630
A0A2K3L797	Trifolium	-0.818	0.143877	0.925	Unchanged	Respiratory burst oxidase protein C-like	GO:0016020; GO:0016491		membrane [GO:0016020]	oxidoreductase activity [GO:0016491]	O81210	AT5G51060
A0A2K3L7A4	Trifolium	-1.26	0.100519	0.907	Unchanged	Patatin (EC 3.1.1.-)	GO:0016042; GO:0016787	lipid catabolic process [GO:0016042]		hydrolase activity [GO:0016787]	O48723	AT2G26560
A0A2K3L7C8	Trifolium	0.595	0.494304	0.965	Unchanged	PAP-associated domain-containing protein 5-like	GO:1990817			poly(A) RNA polymerase activity [GO:1990817]	Q84WU1	AT5G53770
A0A2K3L7E2	Trifolium	0.26	0.474962	0.964	Unchanged	Ras-related protein RAB11D-like	GO:0003924; GO:0005525			GTP binding [GO:0005525]; GTPase activity [GO:0003924]	Q39222	AT1G16920
A0A2K3L7G2	Trifolium	2.11	0.0126167	0.686	Up-regulated	Pectinesterase (EC 3.1.1.11)	GO:0030599; GO:0042545; GO:0045330; GO:0045490	cell wall modification [GO:0042545]; pectin catabolic process [GO:0045490]		aspartyl esterase activity [GO:0045330]; pectinesterase activity [GO:0030599]	Q9LXK7	AT3G43270
A0A2K3L7G7	Trifolium	-0.0646	0.807607	0.974	Unchanged	N-alpha-acetyltransferase 11-like protein	GO:0003729; GO:0004596; GO:0005829; GO:0009414; GO:0009793; GO:0031415	embryo development ending in seed dormancy [GO:0009793]; response to water deprivation [GO:0009414]	cytosol [GO:0005829]; NatA complex [GO:0031415]	mRNA binding [GO:0003729]; peptide alpha-N-acetyltransferase activity [GO:0004596]	Q9FKI4	AT5G13780
A0A2K3L7K1	Trifolium	-0.115	0.870091	0.976	Unchanged	Translocation protein SEC63	GO:0005789		endoplasmic reticulum membrane [GO:0005789]		F4HQE1	#N/A
A0A2K3L7L1	Trifolium	1.31	0.0323826	0.813	Up-regulated	NADH dehydrogenase	GO:0016491; GO:0046872; GO:0051537			2 iron, 2 sulfur cluster binding [GO:0051537]; metal ion binding [GO:0046872]; oxidoreductase activity [GO:0016491]	O22769	AT4G02580
A0A2K3L7L3	Trifolium	-0.0737	0.849454	0.975	Unchanged	HXXXD-type acyl-transferase family protein	GO:0016740			transferase activity [GO:0016740]	Q9FMN6	AT5G42830
A0A2K3L7M2	Trifolium	-0.269	0.606379	0.969	Unchanged	Arogenate dehydratase (EC 4.2.1.91)	GO:0004664; GO:0009094; GO:0009570; GO:0047769	L-phenylalanine biosynthetic process [GO:0009094]	chloroplast stroma [GO:0009570]	arogenate dehydratase activity [GO:0047769]; prephenate dehydratase activity [GO:0004664]	Q9SGD6	AT1G08250
A0A2K3L7N1	Trifolium	0.61	0.318563	0.954	Unchanged	Protein ELC-like	GO:0005768; GO:0015031; GO:0036211	protein modification process [GO:0036211]; protein transport [GO:0015031]	endosome [GO:0005768]		Q9LHG8	AT3G12400
A0A2K3L7N2	Trifolium	0.522	0.145121	0.926	Unchanged	Cullin-3a-like protein	GO:0006511; GO:0008757; GO:0031625	ubiquitin-dependent protein catabolic process [GO:0006511]		S-adenosylmethionine-dependent methyltransferase activity [GO:0008757]; ubiquitin protein ligase binding [GO:0031625]	Q9ZVH4	AT1G26830
A0A2K3L7N4	Trifolium	0.339	0.327339	0.955	Unchanged	Ion protease mitochondrial-like	GO:0004176; GO:0004252; GO:0005524; GO:0006508; GO:0030163	protein catabolic process [GO:0030163]; proteolysis [GO:0006508]		ATP binding [GO:0005524]; ATP-dependent peptidase activity [GO:0004176]; serine-type endopeptidase activity [GO:0004252]	P93655	#N/A
A0A2K3L7N7	Trifolium	0.0524	0.798218	0.974	Unchanged	Elongation factor 1-alpha	GO:0003746; GO:0003924; GO:0005525			GTP binding [GO:0005525]; GTPase activity [GO:0003924]; translation elongation factor activity [GO:0003746]	Q8W4H7	AT5G60390
A0A2K3L7P5	Trifolium	0.00477	0.986888	0.978	Unchanged	Eukaryotic translation initiation factor 4g-like protein	GO:0003743			translation initiation factor activity [GO:0003743]	Q76E23	AT3G60240
A0A2K3L7R0	Trifolium	0.633	0.212022	0.941	Unchanged	Pistil-specific extensin-like protein					O64586	AT2G34700
A0A2K3L7S3	Trifolium	0.461	0.469678	0.964	Unchanged	Xylogalacturonan beta-xylosyltransferase-like protein	GO:0000139; GO:0006486; GO:0016757	protein glycosylation [GO:0006486]	Golgi membrane [GO:0000139]	glycosyltransferase activity [GO:0016757]	Q9M3D9	AT3G45400
A0A2K3L7S7	Trifolium	-0.226	0.77006	0.974	Unchanged	Stem-specific protein TSJT1-like					Q93V62	AT4G27450
A0A2K3L7U3	Trifolium	0.0383	0.906269	0.976	Unchanged	4-coumarate-CoA ligase 10-like protein	GO:0005737; GO:0010030; GO:0010214; GO:0033611; GO:0050203; GO:0050832	defense response to fungus [GO:0050832]; oxalate catabolic process [GO:0033611]; positive regulation of seed germination [GO:0010030]; seed coat development [GO:0010214]	cytoplasm [GO:0005737]	oxalate-CoA ligase activity [GO:0050203]	Q9SMT7	AT3G48990
A0A2K3L7V3	Trifolium	0.574	0.123443	0.918	Unchanged	Dihydropyrimidinase	GO:0016810			hydrolase activity, acting on carbon-nitrogen (but not peptide) bonds [GO:0016810]	Q9FMP3	AT5G12200
A0A2K3L7V8	Trifolium	-0.653	0.0120795	0.682	Down-regulated	RNA-binding protein 38-like					Q501B0	AT2G46780
A0A2K3L803	Trifolium	0.826	0.203223	0.94	Unchanged	caffeoyl-CoA O-methyltransferase (EC 2.1.1.104)	GO:0008171; GO:0032259	methylation [GO:0032259]		O-methyltransferase activity [GO:0008171]	A0A1P8B3H0	#N/A
A0A2K3L804	Trifolium	0.477	0.30536	0.953	Unchanged	50S ribosomal protein L20	GO:0003735; GO:0005840; GO:0006412; GO:0009536; GO:0019843; GO:1990904	translation [GO:0006412]	plastid [GO:0009536]; ribonucleoprotein complex [GO:1990904]; ribosome [GO:0005840]	rRNA binding [GO:0019843]; structural constituent of ribosome [GO:0003735]	Q8LCN1	AT1G16740
A0A2K3L809	Trifolium	-1.4	0.00650543	0.618	Down-regulated	dolichyl-diphosphooligosaccharide--protein glycotransferase (EC 2.4.99.18)	GO:0004579; GO:0006486; GO:0016020; GO:0046872	protein glycosylation [GO:0006486]	membrane [GO:0016020]	dolichyl-diphosphooligosaccharide-protein glycotransferase activity [GO:0004579]; metal ion binding [GO:0046872]	Q9FX21	AT1G34130
A0A2K3L811	Trifolium	-0.531	0.288402	0.951	Unchanged	RING-type E3 ubiquitin transferase (EC 2.3.2.27)	GO:0005789; GO:0016740; GO:0046872		endoplasmic reticulum membrane [GO:0005789]	metal ion binding [GO:0046872]; transferase activity [GO:0016740]	Q9LW77	AT3G16090
A0A2K3L813	Trifolium	-1.77	0.00183526	0.444	Down-regulated	ABC-type xenobiotic transporter (EC 7.6.2.2)	GO:0005524; GO:0016887			ATP binding [GO:0005524]; ATP hydrolysis activity [GO:0016887]	Q9LYS2	AT3G59140
A0A2K3L815	Trifolium	-1.37	0.109378	0.911	Unchanged	Apyrase 2-like protein	GO:0016787			hydrolase activity [GO:0016787]	Q9SQG2	AT3G04080
A0A2K3L818	Trifolium	0.135	0.571939	0.968	Unchanged	Serine/threonine protein phosphatase 2A 55 kDa regulatory subunit B beta-like protein	GO:0000159; GO:0019888		protein phosphatase type 2A complex [GO:0000159]	protein phosphatase regulator activity [GO:0019888]	Q39247	AT1G17720
A0A2K3L832	Trifolium	-0.106	0.62911	0.97	Unchanged	Heterogeneous nuclear ribonucleoprotein 27C	GO:0003723; GO:0005634; GO:1990904		nucleus [GO:0005634]; ribonucleoprotein complex [GO:1990904]	RNA binding [GO:0003723]	Q8W4A6	#N/A
A0A2K3L833	Trifolium	0.0785	0.83414	0.975	Unchanged	Signal peptidase complex subunit 3 (Microsomal signal peptidase 22 kDa subunit)	GO:0005787; GO:0006465	signal peptide processing [GO:0006465]	signal peptidase complex [GO:0005787]		Q9MA96	AT3G05230
A0A2K3L840	Trifolium	0.343	0.266855	0.949	Unchanged	Cucumber peeling cupredoxin-like protein	GO:0009055			electron transfer activity [GO:0009055]	O82761	AT2G31050
A0A2K3L851	Trifolium	0.304	0.336427	0.956	Unchanged	AMP deaminase (EC 3.5.4.6)	GO:0003876; GO:0032264	IMP salvage [GO:0032264]		AMP deaminase activity [GO:0003876]	O80452	AT2G38280
A0A2K3L858	Trifolium	0.607	0.0614389	0.874	Unchanged	UTP-glucose-1-phosphate uridylyltransferase	GO:0016779			nucleotidyltransferase activity [GO:0016779]	P57751	AT5G17310
A0A2K3L862	Trifolium	0.0602	0.898623	0.976	Unchanged	Transmembrane protein	GO:0016020		membrane [GO:0016020]		Q0WV86	AT3G48200
A0A2K3L867	Trifolium	0.433	0.461938	0.964	Unchanged	ADP-ribosylation factor 1-like protein	GO:0003924; GO:0005525; GO:0005794; GO:0016192	vesicle-mediated transport [GO:0016192]	Golgi apparatus [GO:0005794]	GTP binding [GO:0005525]; GTPase activity [GO:0003924]	P40940	AT2G24765
A0A2K3L869	Trifolium	-0.102	0.86343	0.976	Unchanged	Polyketide hydroxylase-like protein	GO:0071949			FAD binding [GO:0071949]	Q8GYJ7	AT1G24340
A0A2K3L872	Trifolium	-0.46	0.531981	0.967	Unchanged	non-specific serine/threonine protein kinase (EC 2.7.11.1)	GO:0004672; GO:0005524; GO:0016310	phosphorylation [GO:0016310]		ATP binding [GO:0005524]; protein kinase activity [GO:0004672]	A0A1I9LQM5	#N/A
A0A2K3L873	Trifolium	0.292	0.443953	0.963	Unchanged	RPM1-interacting protein 4-like					A0A1I9LMJ4	#N/A
A0A2K3L875	Trifolium	-0.591	0.137238	0.923	Unchanged	Putative inactive purple acid phosphatase 1-like protein	GO:0003993; GO:0005576; GO:0046872		extracellular region [GO:0005576]	acid phosphatase activity [GO:0003993]; metal ion binding [GO:0046872]	Q9LMX4	AT1G13750
A0A2K3L876	Trifolium	-0.625	0.329622	0.955	Unchanged	Cysteine synthase-like protein	GO:0004124; GO:0006535	cysteine biosynthetic process from serine [GO:0006535]		cysteine synthase activity [GO:0004124]	Q9S6Z7	AT3G04940
A0A2K3L877	Trifolium	-0.467	0.457453	0.963	Unchanged	Pollen Ole E I-like protein					Q9FS16	AT1G21310
A0A2K3L887	Trifolium	-0.895	0.115071	0.914	Unchanged	Serine/threonine protein phosphatase 2A regulatory subunit	GO:0000159; GO:0007165; GO:0019888	signal transduction [GO:0007165]	protein phosphatase type 2A complex [GO:0000159]	protein phosphatase regulator activity [GO:0019888]	Q9LVE2	AT3G21650
A0A2K3L890	Trifolium	1.07	0.21872	0.942	Unchanged	Uncharacterized protein					#N/A	#N/A
A0A2K3L899	Trifolium	-0.168	0.659177	0.971	Unchanged	Transcriptional corepressor LEUNIG-like protein					F4JUD2	#N/A
A0A2K3L8B6	Trifolium	-0.149	0.723982	0.973	Unchanged	Cysteine proteinase	GO:0006508; GO:0008234	proteolysis [GO:0006508]		cysteine-type peptidase activity [GO:0008234]	Q9FJ47	AT5G45890
A0A2K3L8C0	Trifolium	-0.744	0.211578	0.941	Unchanged	6-hydroxynicotinate 3-monooxygenase-like protein	GO:0004497			monooxygenase activity [GO:0004497]	Q9LFM4	#N/A
A0A2K3L8D9	Trifolium	-0.429	0.464318	0.964	Unchanged	Putative endo-beta-xylanase C-like protein	GO:0031176; GO:0045493	xylan catabolic process [GO:0045493]		endo-1,4-beta-xylanase activity [GO:0031176]	Q84VX1	AT4G38650
A0A2K3L8E2	Trifolium	-0.76	0.0178541	0.732	Down-regulated	Eukaryotic translation initiation factor 3 subunit g-like protein	GO:0003723; GO:0003743			RNA binding [GO:0003723]; translation initiation factor activity [GO:0003743]	Q9SSJ0	#N/A
A0A2K3L8E8	Trifolium	0.556	0.232025	0.944	Unchanged	Post-GPI attachment to proteins factor 3	GO:0000139; GO:0006506	GPI anchor biosynthetic process [GO:0006506]	Golgi membrane [GO:0000139]		Q9FX73	#N/A
A0A2K3L8F6	Trifolium	-0.249	0.626069	0.97	Unchanged	Glucose-6-phosphate 1-dehydrogenase cytoplasmic-like	GO:0004345; GO:0006006; GO:0050661	glucose metabolic process [GO:0006006]		glucose-6-phosphate dehydrogenase activity [GO:0004345]; NADP binding [GO:0050661]	Q9LK23	AT3G27300
A0A2K3L8H1	Trifolium	0.64	0.185638	0.936	Unchanged	Acyl-coenzyme A thioesterase	GO:0047617			acyl-CoA hydrolase activity [GO:0047617]	P93828	#N/A
A0A2K3L8H3	Trifolium	0.142	0.6706	0.971	Unchanged	Expp1 protein					Q8VZ18	AT3G44150
A0A2K3L8J2	Trifolium	0.182	0.684823	0.972	Unchanged	ABC transporter G family member 36-like protein	GO:0005524; GO:0016887			ATP binding [GO:0005524]; ATP hydrolysis activity [GO:0016887]	Q9XIE2	AT1G59870
A0A2K3L8J7	Trifolium	-0.0592	0.758718	0.973	Unchanged	Transmembrane protein	GO:0016020		membrane [GO:0016020]		Q9LHA3	#N/A
A0A2K3L8L1	Trifolium	-0.946	0.403317	0.96	Unchanged	Methylmalonate-semialdehyde dehydrogenase	GO:0004491			methylmalonate-semialdehyde dehydrogenase (acylating, NAD) activity [GO:0004491]	A8MQR6	#N/A
A0A2K3L8L2	Trifolium	-2.04	0.0148626	0.708	Down-regulated	14 kDa zinc-binding protein	GO:0047627			adenylylsulfatase activity [GO:0047627]	Q8GUN2	AT3G56490
A0A2K3L8L3	Trifolium	-0.0667	0.908834	0.976	Unchanged	Thaumatin-like protein 1-like					Q9LQT4	AT1G75800
A0A2K3L8L8	Trifolium	-1.77	0.00427962	0.559	Down-regulated	Fatty acyl-CoA reductase (EC 1.2.1.84)	GO:0006629; GO:0080019; GO:0102965	lipid metabolic process [GO:0006629]		alcohol-forming long-chain fatty acyl-CoA reductase activity [GO:0102965]; alcohol-forming very long-chain fatty acyl-CoA reductase activity [GO:0080019]	Q08891	AT3G11980
A0A2K3L8M1	Trifolium	-0.121	0.65691	0.971	Unchanged	Uncharacterized protein					A0A1P8B868	#N/A
A0A2K3L8M7	Trifolium	1.02	0.1403	0.924	Unchanged	Cytochrome p450	GO:0004497; GO:0005506; GO:0016020; GO:0016705; GO:0020037		membrane [GO:0016020]	heme binding [GO:0020037]; iron ion binding [GO:0005506]; monooxygenase activity [GO:0004497]; oxidoreductase activity, acting on paired donors, with incorporation or reduction of molecular oxygen [GO:0016705]	Q9LTL8	AT3G26230
A0A2K3L8R8	Trifolium	-0.721	0.182356	0.935	Unchanged	Long chain acyl-CoA synthetase peroxisomal-like	GO:0004467			long-chain fatty acid-CoA ligase activity [GO:0004467]	Q8LKS5	AT5G27600
A0A2K3L8S6	Trifolium	0.309	0.637413	0.97	Unchanged	Momilactone A synthase-like protein	GO:0016491			oxidoreductase activity [GO:0016491]	Q94K41	AT2G47140
A0A2K3L8T6	Trifolium	-1.04	0.00325995	0.521	Down-regulated	RNA-binding protein nova-2-like	GO:0003723			RNA binding [GO:0003723]	Q9LZ82	AT5G04430
A0A2K3L8T8	Trifolium	0.126	0.644513	0.97	Unchanged	Peptidyl-prolyl cis-trans isomerase (PPIase) (EC 5.2.1.8)	GO:0003755; GO:0006457	protein folding [GO:0006457]		peptidyl-prolyl cis-trans isomerase activity [GO:0003755]	Q38900	AT2G16600
A0A2K3L8V4	Trifolium	0.742	0.0711526	0.885	Unchanged	Remorin family protein	GO:1901700	response to oxygen-containing compound [GO:1901700]			Q9FFA5	AT5G23750
A0A2K3L8W4	Trifolium	0.0466	0.88009	0.976	Unchanged	Mitochondrial uncoupling protein 1-like	GO:0016020; GO:0046943		membrane [GO:0016020]	carboxylic acid transmembrane transporter activity [GO:0046943]	O81845	AT3G54110
A0A2K3L8X4	Trifolium	0.508	0.187533	0.936	Unchanged	Stearoyl-ACP desaturase	GO:0006633; GO:0045300	fatty acid biosynthetic process [GO:0006633]		acyl-[acyl-carrier-protein] desaturase activity [GO:0045300]	O22832	AT2G43710
A0A2K3L8X6	Trifolium	-0.401	0.587393	0.969	Unchanged	Phospho-2-dehydro-3-deoxyheptonate aldolase (EC 2.5.1.54)	GO:0003849; GO:0008652; GO:0009073; GO:0009423; GO:0009507	amino acid biosynthetic process [GO:0008652]; aromatic amino acid family biosynthetic process [GO:0009073]; chorismate biosynthetic process [GO:0009423]	chloroplast [GO:0009507]	3-deoxy-7-phosphoheptulonate synthase activity [GO:0003849]	Q9SK84	AT1G22410
A0A2K3L8Y8	Trifolium	-0.136	0.452026	0.963	Unchanged	40S ribosomal protein S24	GO:0003729; GO:0003735; GO:0005840; GO:0006412; GO:1990904	translation [GO:0006412]	ribonucleoprotein complex [GO:1990904]; ribosome [GO:0005840]	mRNA binding [GO:0003729]; structural constituent of ribosome [GO:0003735]	Q8LC83	AT5G28060
A0A2K3L8Y9	Trifolium	-0.435	0.713594	0.972	Unchanged	Ras-related protein RABA1f-like	GO:0003924; GO:0005525			GTP binding [GO:0005525]; GTPase activity [GO:0003924]	Q9FJH0	AT5G60860
A0A2K3L903	Trifolium	-0.106	0.673575	0.971	Unchanged	Peptidyl-prolyl cis-trans isomerase	GO:0003755			peptidyl-prolyl cis-trans isomerase activity [GO:0003755]	Q93ZN3	AT4G17070
A0A2K3L910	Trifolium	-0.00457	0.984678	0.978	Unchanged	60S ribosomal protein l21-1-like	GO:0003735; GO:0005840; GO:0006412	translation [GO:0006412]	ribosome [GO:0005840]	structural constituent of ribosome [GO:0003735]	Q43291	AT1G09690
A0A2K3L912	Trifolium	-0.911	0.0115897	0.678	Down-regulated	Cytosolic purine 5'-nucleotidase-like protein	GO:0016787; GO:0046872			hydrolase activity [GO:0016787]; metal ion binding [GO:0046872]	F4K3A9	AT5G48960
A0A2K3L914	Trifolium	-1.03	0.188803	0.937	Unchanged	Mitochondrial inner membrane protease subunit 1-like protein	GO:0006508; GO:0008233	proteolysis [GO:0006508]		peptidase activity [GO:0008233]	Q84VZ6	AT2G31140
A0A2K3L915	Trifolium	-0.734	0.177325	0.934	Unchanged	Uncharacterized protein					F4JJB2	AT4G09150
A0A2K3L917	Trifolium	0.121	0.796034	0.974	Unchanged	N-acetylornithine deacetylase-like protein					F4JPZ7	#N/A
A0A2K3L926	Trifolium	-0.338	0.12288	0.918	Unchanged	40S ribosomal protein s6-like	GO:0003735; GO:0005840; GO:0006412; GO:1990904	translation [GO:0006412]	ribonucleoprotein complex [GO:1990904]; ribosome [GO:0005840]	structural constituent of ribosome [GO:0003735]	O48549	AT4G31700
A0A2K3L927	Trifolium	0.425	0.0983615	0.905	Unchanged	ADP,ATP carrier protein	GO:0005471; GO:0005524; GO:0031969		chloroplast membrane [GO:0031969]	ATP binding [GO:0005524]; ATP:ADP antiporter activity [GO:0005471]	Q39002	AT1G80300
A0A2K3L934	Trifolium	1.44	0.0956334	0.904	Unchanged	UOS1					Q8VYA4	#N/A
A0A2K3L947	Trifolium	-0.624	0.0794727	0.892	Unchanged	Putative LRR receptor-like protein kinase	GO:0016301; GO:0016310	phosphorylation [GO:0016310]		kinase activity [GO:0016301]	C0LGD7	AT1G06840
A0A2K3L948	Trifolium	-0.103	0.80581	0.974	Unchanged	Peroxidase (EC 1.11.1.7)	GO:0005576; GO:0006979; GO:0020037; GO:0042744; GO:0046872; GO:0140825	hydrogen peroxide catabolic process [GO:0042744]; response to oxidative stress [GO:0006979]	extracellular region [GO:0005576]	heme binding [GO:0020037]; lactoperoxidase activity [GO:0140825]; metal ion binding [GO:0046872]	Q9FL16	AT5G40150
A0A2K3L957	Trifolium	0.352	0.316465	0.954	Unchanged	Glyoxylate reductase	GO:0016616; GO:0051287			NAD binding [GO:0051287]; oxidoreductase activity, acting on the CH-OH group of donors, NAD or NADP as acceptor [GO:0016616]	Q9CA90	AT1G79870
A0A2K3L961	Trifolium	-0.387	0.291266	0.952	Unchanged	Oxidoreductase family NAD-binding rossmann fold protein	GO:0000166			nucleotide binding [GO:0000166]	Q9SZ83	AT4G09670
A0A2K3L964	Trifolium	-0.945	0.147179	0.926	Unchanged	ATP synthase subunit delta mitochondrial-like					Q96252	AT5G47030
A0A2K3L967	Trifolium	-0.221	0.599143	0.969	Unchanged	Alpha-glucosidase 2-like protein	GO:0004553; GO:0005975	carbohydrate metabolic process [GO:0005975]		hydrolase activity, hydrolyzing O-glycosyl compounds [GO:0004553]	Q93Y12	#N/A
A0A2K3L969	Trifolium	-0.542	0.208425	0.94	Unchanged	Acetyl-CoA acetyltransferase cytosolic 2-like protein	GO:0003985			acetyl-CoA C-acetyltransferase activity [GO:0003985]	Q8S4Y1	AT5G48230
A0A2K3L981	Trifolium	-1.01	0.242579	0.946	Unchanged	Kunitz type trypsin inhibitor	GO:0004866; GO:0005576		extracellular region [GO:0005576]	endopeptidase inhibitor activity [GO:0004866]	Q9LMU2	AT1G17860
A0A2K3L983	Trifolium	0.0341	0.924322	0.977	Unchanged	Xylose isomerase (EC 5.3.1.5)	GO:0005737; GO:0009045; GO:0042732; GO:0046872	D-xylose metabolic process [GO:0042732]	cytoplasm [GO:0005737]	metal ion binding [GO:0046872]; xylose isomerase activity [GO:0009045]	Q9FKK7	AT5G57655
A0A2K3L995	Trifolium	-0.265	0.506489	0.966	Unchanged	Isocitrate dehydrogenase	GO:0004450; GO:0006102; GO:0046872	isocitrate metabolic process [GO:0006102]		isocitrate dehydrogenase (NADP+) activity [GO:0004450]; metal ion binding [GO:0046872]	Q9SRZ6	AT1G65930
A0A2K3L9A9	Trifolium	0.346	0.393485	0.96	Unchanged	UPF0420 C16orf58-like protein	GO:0010224; GO:0032502	developmental process [GO:0032502]; response to UV-B [GO:0010224]			Q7X6P3	AT3G45890
A0A2K3L9B5	Trifolium	0.0564	0.878333	0.976	Unchanged	6-phosphogluconate dehydrogenase NAD-binding domain protein	GO:0016616; GO:0050661; GO:0051287			NAD binding [GO:0051287]; NADP binding [GO:0050661]; oxidoreductase activity, acting on the CH-OH group of donors, NAD or NADP as acceptor [GO:0016616]	Q9SZE1	AT4G29120
A0A2K3L9B9	Trifolium	-0.212	0.824733	0.975	Unchanged	Beta-glucosidase 24-like protein	GO:0004553; GO:0005975	carbohydrate metabolic process [GO:0005975]		hydrolase activity, hydrolyzing O-glycosyl compounds [GO:0004553]	A0A1P8B0I8	#N/A
A0A2K3L9C2	Trifolium	1.8	0.101398	0.907	Unchanged	Protein ABIL3					Q9M3A3	AT3G49290
A0A2K3L9C5	Trifolium	-0.148	0.630536	0.97	Unchanged	Xaa-pro aminopeptidase P-like protein	GO:0004177			aminopeptidase activity [GO:0004177]	Q8RY11	AT3G05350
A0A2K3L9F4	Trifolium	0.569	0.468416	0.964	Unchanged	Glutathione S-transferase (EC 2.5.1.18)	GO:0004364; GO:0005829; GO:0006749; GO:0042221	glutathione metabolic process [GO:0006749]; response to chemical [GO:0042221]	cytosol [GO:0005829]	glutathione transferase activity [GO:0004364]	Q9SHH7	AT1G17180
A0A2K3L9G2	Trifolium	0.4	0.101931	0.908	Unchanged	SEC1 family transport protein SLY1-like	GO:0016192	vesicle-mediated transport [GO:0016192]			Q9SL48	AT2G17980
A0A2K3L9G4	Trifolium	0.387	0.307698	0.953	Unchanged	Late embryogenesis abundant protein	GO:0009269	response to desiccation [GO:0009269]			O80576	AT2G44060
A0A2K3L9H3	Trifolium	-0.0956	0.654567	0.971	Unchanged	RNA helicase (EC 3.6.4.13)	GO:0000398; GO:0003676; GO:0003724; GO:0005524	mRNA splicing, via spliceosome [GO:0000398]		ATP binding [GO:0005524]; nucleic acid binding [GO:0003676]; RNA helicase activity [GO:0003724]	Q38953	AT3G26560
A0A2K3L9H6	Trifolium	-0.32	0.306486	0.953	Unchanged	Putative 26S proteasome non-ATPase regulatory subunit 6-like protein	GO:0000502; GO:0008757		proteasome complex [GO:0000502]	S-adenosylmethionine-dependent methyltransferase activity [GO:0008757]	Q93Y35	AT4G24820
A0A2K3L9L6	Trifolium	1.13	0.0904436	0.9	Unchanged	Plant invertase/pectin methylesterase inhibitor protein	GO:0004857			enzyme inhibitor activity [GO:0004857]	F4HXW0	AT1G14890
A0A2K3L9M2	Trifolium	-0.567	0.0558294	0.866	Unchanged	UBA and UBX domain-containing-like protein					Q7Y175	AT4G15410
A0A2K3L9N0	Trifolium	0.97	0.0275258	0.793	Up-regulated	Phosphoglucan phosphatase LSF1 chloroplastic-like	GO:0009507		chloroplast [GO:0009507]		A0A1I9LL73	#N/A
A0A2K3L9N8	Trifolium	-0.0199	0.931382	0.977	Unchanged	60S ribosomal protein l18a-like	GO:0003735; GO:0005840; GO:0006412	translation [GO:0006412]	ribosome [GO:0005840]	structural constituent of ribosome [GO:0003735]	P51418	AT2G34480
A0A2K3L9P2	Trifolium	0.522	0.495273	0.965	Unchanged	NBS-containing resistance-like protein	GO:0006952	defense response [GO:0006952]			Q39214	AT3G07040
A0A2K3L9P4	Trifolium	-0.185	0.46953	0.964	Unchanged	RING-type E3 ubiquitin transferase (EC 2.3.2.27)	GO:0004842; GO:0016567	protein ubiquitination [GO:0016567]		ubiquitin-protein transferase activity [GO:0004842]	Q9SNC6	AT3G46510
A0A2K3L9S2	Trifolium	-0.158	0.793986	0.974	Unchanged	Uncharacterized protein					A0A1P8B1Y3	#N/A
A0A2K3L9S3	Trifolium	-1.26	0.0963825	0.904	Unchanged	Uncharacterized protein					Q93WB8	AT3G13410
A0A2K3L9T1	Trifolium	-0.46	0.137314	0.923	Unchanged	Thioredoxin domain-containing protein	GO:0003756; GO:0005783; GO:0009553; GO:0009567; GO:0009793; GO:0034976; GO:0048868	double fertilization forming a zygote and endosperm [GO:0009567]; embryo development ending in seed dormancy [GO:0009793]; embryo sac development [GO:0009553]; pollen tube development [GO:0048868]; response to endoplasmic reticulum stress [GO:0034976]	endoplasmic reticulum [GO:0005783]	protein disulfide isomerase activity [GO:0003756]	A8MSC5	#N/A
A0A2K3L9T3	Trifolium	0.0941	0.799936	0.974	Unchanged	Methyltransferase (EC 2.1.1.-)	GO:0008168; GO:0016020; GO:0032259	methylation [GO:0032259]	membrane [GO:0016020]	methyltransferase activity [GO:0008168]	Q9LZA4	AT5G04060
A0A2K3L9V4	Trifolium	-0.0316	0.939762	0.977	Unchanged	peroxidase (EC 1.11.1.7)	GO:0006979; GO:0020037; GO:0046872; GO:0140825	response to oxidative stress [GO:0006979]		heme binding [GO:0020037]; lactoperoxidase activity [GO:0140825]; metal ion binding [GO:0046872]	Q96520	AT1G71695
A0A2K3L9W6	Trifolium	-0.374	0.134791	0.922	Unchanged	AT-hook motif nuclear-localized protein	GO:0003680; GO:0005634		nucleus [GO:0005634]	minor groove of adenine-thymine-rich DNA binding [GO:0003680]	Q8VYJ2	AT4G12080
A0A2K3L9W9	Trifolium	-0.833	0.274204	0.95	Unchanged	Isoflavone reductase-like protein	GO:0009807; GO:0016491	lignan biosynthetic process [GO:0009807]		oxidoreductase activity [GO:0016491]	B3LFB7	#N/A
A0A2K3L9Y6	Trifolium	-1.64	0.0689123	0.882	Unchanged	Mitochondrial chaperone BCS1	GO:0005524; GO:0016887			ATP binding [GO:0005524]; ATP hydrolysis activity [GO:0016887]	A0A1I9LN06	#N/A
A0A2K3L9Y7	Trifolium	0.421	0.585621	0.969	Unchanged	Cytokinin hydroxylase-like protein	GO:0004497; GO:0005506; GO:0016020; GO:0016705; GO:0020037		membrane [GO:0016020]	heme binding [GO:0020037]; iron ion binding [GO:0005506]; monooxygenase activity [GO:0004497]; oxidoreductase activity, acting on paired donors, with incorporation or reduction of molecular oxygen [GO:0016705]	Q93Z79	AT5G24910
A0A2K3LA10	Trifolium	0.0334	0.856092	0.975	Unchanged	26S proteasome non-ATPase regulatory subunit 1-like protein	GO:0000502; GO:0016020		membrane [GO:0016020]; proteasome complex [GO:0000502]		O48844	AT2G32730
A0A2K3LA13	Trifolium	-0.169	0.563398	0.968	Unchanged	Protein IWS2	GO:0005634; GO:0009742; GO:0032784	brassinosteroid mediated signaling pathway [GO:0009742]; regulation of DNA-templated transcription elongation [GO:0032784]	nucleus [GO:0005634]		F4ICK7	#N/A
A0A2K3LA29	Trifolium	-0.352	0.121098	0.917	Unchanged	monodehydroascorbate reductase (NADH) (EC 1.6.5.4)	GO:0016656; GO:0050660; GO:0098869	cellular oxidant detoxification [GO:0098869]		flavin adenine dinucleotide binding [GO:0050660]; monodehydroascorbate reductase (NADH) activity [GO:0016656]	Q93WJ8	AT5G03630
A0A2K3LA39	Trifolium	0.0835	0.86213	0.976	Unchanged	Sulfhydryl oxidase (EC 1.8.3.2)	GO:0016020; GO:0016971		membrane [GO:0016020]	flavin-dependent sulfhydryl oxidase activity [GO:0016971]	Q8W4J3	AT1G15020
A0A2K3LA40	Trifolium	-0.926	0.128306	0.92	Unchanged	Plant phospholipase-like protein					O49617	#N/A
A0A2K3LA44	Trifolium	0.918	0.171722	0.933	Unchanged	Calmodulin-like protein	GO:0005509			calcium ion binding [GO:0005509]	P59220	AT3G43810
A0A2K3LA60	Trifolium	0.605	0.309001	0.953	Unchanged	Peroxidase (EC 1.11.1.7)	GO:0005576; GO:0006979; GO:0020037; GO:0042744; GO:0046872; GO:0140825	hydrogen peroxide catabolic process [GO:0042744]; response to oxidative stress [GO:0006979]	extracellular region [GO:0005576]	heme binding [GO:0020037]; lactoperoxidase activity [GO:0140825]; metal ion binding [GO:0046872]	O23044	AT1G05260
A0A2K3LA63	Trifolium	-0.239	0.566478	0.968	Unchanged	Long chain acyl-CoA synthetase 4-like protein	GO:0004467			long-chain fatty acid-CoA ligase activity [GO:0004467]	Q9T0A0	AT4G23850
A0A2K3LA68	Trifolium	-0.742	0.0246811	0.779	Down-regulated	RNA helicase (EC 3.6.4.13)	GO:0003743; GO:0004386; GO:0005524; GO:0016787			ATP binding [GO:0005524]; helicase activity [GO:0004386]; hydrolase activity [GO:0016787]; translation initiation factor activity [GO:0003743]	P41376	AT3G13920
A0A2K3LA93	Trifolium	0.0893	0.886429	0.976	Unchanged	Uncharacterized protein					#N/A	#N/A
A0A2K3LAB1	Trifolium	-0.252	0.740321	0.973	Unchanged	Fasciclin-like arabinogalactan protein 11-like	GO:0005886		plasma membrane [GO:0005886]		Q9SIL7	AT2G20520
A0A2K3LAB3	Trifolium	0.381	0.1688	0.932	Unchanged	Amidase family protein					A0A1I9LL70	#N/A
A0A2K3LAB7	Trifolium	-0.186	0.448772	0.963	Unchanged	Syntaxin-131-like protein					F4K9K4	#N/A
A0A2K3LAC1	Trifolium	-1.18	0.136483	0.923	Unchanged	thioredoxin-dependent peroxiredoxin (EC 1.11.1.24)	GO:0140824			thioredoxin-dependent peroxiredoxin activity [GO:0140824]	Q9C5R8	AT5G06290
A0A2K3LAC5	Trifolium	-0.253	0.45097	0.963	Unchanged	Embryo-specific protein					Q6NPM5	AT5G62200
A0A2K3LAD1	Trifolium	0.102	0.854302	0.975	Unchanged	Endoplasmic reticulum-golgi intermediate compartment protein 3-like					F4I1A5	AT1G22200
A0A2K3LAD2	Trifolium	-1.16	0.00885078	0.652	Down-regulated	Transcription elongation factor SPT5 1-like protein	GO:0003682; GO:0003723; GO:0003746; GO:0005654; GO:0006306; GO:0006354; GO:0006357; GO:0030422; GO:0032784; GO:0080188	DNA methylation [GO:0006306]; DNA-templated transcription elongation [GO:0006354]; gene silencing by RNA-directed DNA methylation [GO:0080188]; regulation of DNA-templated transcription elongation [GO:0032784]; regulation of transcription by RNA polymerase II [GO:0006357]; siRNA processing [GO:0030422]	nucleoplasm [GO:0005654]	chromatin binding [GO:0003682]; RNA binding [GO:0003723]; translation elongation factor activity [GO:0003746]	F4JW79	AT5G04290
A0A2K3LAD4	Trifolium	0.0894	0.814572	0.975	Unchanged	Nuclear export mediator factor NEMF-like protein	GO:0003676; GO:0005737; GO:0008270; GO:0072344	rescue of stalled ribosome [GO:0072344]	cytoplasm [GO:0005737]	nucleic acid binding [GO:0003676]; zinc ion binding [GO:0008270]	Q9LTX7	AT5G49930
A0A2K3LAD9	Trifolium	1.08	0.0975051	0.905	Unchanged	Pyrroline-5-carboxylate reductase-like protein					F4K884	#N/A
A0A2K3LAJ2	Trifolium	0.235	0.312337	0.954	Unchanged	GDP-L-fucose synthase (EC 1.1.1.271)	GO:0042351; GO:0050577	'de novo' GDP-L-fucose biosynthetic process [GO:0042351]		GDP-L-fucose synthase activity [GO:0050577]	Q9LMU0	AT1G17890
A0A2K3LAJ5	Trifolium	0.258	0.806797	0.974	Unchanged	Polygalacturonase inhibitor-like protein					Q9LH52	AT3G12145
A0A2K3LAJ9	Trifolium	1.85	0.0083498	0.646	Up-regulated	Succinate/fumarate mitochondrial transporter	GO:0015141; GO:0015742; GO:0015743; GO:0015746; GO:0031966	alpha-ketoglutarate transport [GO:0015742]; citrate transport [GO:0015746]; malate transport [GO:0015743]	mitochondrial membrane [GO:0031966]	succinate transmembrane transporter activity [GO:0015141]	Q9M038	AT5G01340
A0A2K3LAK3	Trifolium	-0.721	0.422419	0.961	Unchanged	protein-serine/threonine phosphatase (EC 3.1.3.16)	GO:0016020; GO:0017018; GO:0046872		membrane [GO:0016020]	metal ion binding [GO:0046872]; myosin phosphatase activity [GO:0017018]	A0A1P8AY87	#N/A
A0A2K3LAL1	Trifolium	0.214	0.407915	0.961	Unchanged	HD domain-containing protein 2-like	GO:0002953; GO:0005524			5'-deoxynucleotidase activity [GO:0002953]; ATP binding [GO:0005524]	A0A1P8ANS1	AT1G26160
A0A2K3LAL6	Trifolium	-0.111	0.714935	0.972	Unchanged	HSP70-binding protein 1-like					A8MQ87	AT3G09350
A0A2K3LAM0	Trifolium	-1.14	0.100999	0.907	Unchanged	Alpha-D-xylosidase	GO:0004553; GO:0005975	carbohydrate metabolic process [GO:0005975]		hydrolase activity, hydrolyzing O-glycosyl compounds [GO:0004553]	Q9S7Y7	AT1G68560
A0A2K3LAM1	Trifolium	0.499	0.553272	0.967	Unchanged	Short-chain dehydrogenase/reductase (EC 1.1.1.-)	GO:0016616			oxidoreductase activity, acting on the CH-OH group of donors, NAD or NADP as acceptor [GO:0016616]	Q9M2E2	AT3G61220
A0A2K3LAM7	Trifolium	-0.22	0.558481	0.968	Unchanged	Nodulin 6					F4J9A0	AT3G53180
A0A2K3LAM9	Trifolium	-0.0432	0.915307	0.977	Unchanged	Flavonol synthase/flavanone 3-hydroxylase	GO:0044550; GO:0046872; GO:0051213	secondary metabolite biosynthetic process [GO:0044550]		dioxygenase activity [GO:0051213]; metal ion binding [GO:0046872]	A1A6I8	AT4G16765
A0A2K3LAN7	Trifolium	0.485	0.306439	0.953	Unchanged	Glutamine synthetase	GO:0004356; GO:0006542	glutamine biosynthetic process [GO:0006542]		glutamine synthetase activity [GO:0004356]	Q56WN1	AT5G37600
A0A2K3LAQ4	Trifolium	1.23	0.137851	0.923	Unchanged	Tubulin alpha-3 chain-like protein	GO:0005200; GO:0005525; GO:0005874; GO:0007017; GO:0016787	microtubule-based process [GO:0007017]	microtubule [GO:0005874]	GTP binding [GO:0005525]; hydrolase activity [GO:0016787]; structural constituent of cytoskeleton [GO:0005200]	Q56WH1	AT5G19780
A0A2K3LAT7	Trifolium	0.186	0.570598	0.968	Unchanged	Heat shock cognate 70 kDa protein 2-like	GO:0005524; GO:0007165; GO:0016887; GO:0043531; GO:0140662	signal transduction [GO:0007165]		ADP binding [GO:0043531]; ATP binding [GO:0005524]; ATP hydrolysis activity [GO:0016887]; ATP-dependent protein folding chaperone [GO:0140662]	P22953	AT5G02500
A0A2K3LAT9	Trifolium	-0.199	0.37748	0.959	Unchanged	Developmentally-regulated gtp-binding protein 1-like	GO:0003924; GO:0005525			GTP binding [GO:0005525]; GTPase activity [GO:0003924]	Q9SVA6	AT4G39520
A0A2K3LAU8	Trifolium	0.158	0.345919	0.956	Unchanged	Elongation factor 1-alpha-like protein	GO:0003746; GO:0003924; GO:0005525			GTP binding [GO:0005525]; GTPase activity [GO:0003924]; translation elongation factor activity [GO:0003746]	Q8W4H7	AT5G60390
A0A2K3LAV5	Trifolium	1.86	0.00591691	0.606	Up-regulated	Methyltransferase (EC 2.1.1.-)	GO:0008168; GO:0016020; GO:0032259	methylation [GO:0032259]	membrane [GO:0016020]	methyltransferase activity [GO:0008168]	Q9ZPH9	AT4G00750
A0A2K3LAV6	Trifolium	-0.894	0.237789	0.945	Unchanged	RNA-binding protein					#N/A	#N/A
A0A2K3LAX6	Trifolium	-0.456	0.183647	0.936	Unchanged	Zinc finger CCCH domain-containing protein 20-like					Q9M0G2	AT4G29190
A0A2K3LAZ5	Trifolium	-2.06	0.000572071	0.269	Down-regulated	RabGAP/TBC domain protein					A0A1P8AYZ1	#N/A
A0A2K3LAZ7	Trifolium	-0.769	0.0816344	0.894	Unchanged	ADP,ATP carrier protein	GO:0005471; GO:0005524; GO:0031969		chloroplast membrane [GO:0031969]	ATP binding [GO:0005524]; ATP:ADP antiporter activity [GO:0005471]	Q39002	AT1G80300
A0A2K3LB06	Trifolium	0.609	0.703784	0.972	Unchanged	L-ascorbate oxidase	GO:0005507; GO:0016491			copper ion binding [GO:0005507]; oxidoreductase activity [GO:0016491]	Q8LPS9	AT5G66920
A0A2K3LB16	Trifolium	-0.0565	0.855268	0.975	Unchanged	Clathrin heavy chain 1-like protein	GO:0005198; GO:0006886; GO:0016192; GO:0030130; GO:0030132	intracellular protein transport [GO:0006886]; vesicle-mediated transport [GO:0016192]	clathrin coat of coated pit [GO:0030132]; clathrin coat of trans-Golgi network vesicle [GO:0030130]	structural molecule activity [GO:0005198]	Q0WNJ6	AT3G11130
A0A2K3LB50	Trifolium	-0.149	0.557657	0.968	Unchanged	Pyridoxamine 5'-phosphate oxidase family protein					Q9C8K8	AT1G51560
A0A2K3LB61	Trifolium	-0.872	0.107298	0.91	Unchanged	Cysteine synthase					P47999	AT2G43750
A0A2K3LB68	Trifolium	0.971	0.225703	0.943	Unchanged	DNA polymerase alpha catalytic subunit-like protein	GO:0005634; GO:0006259; GO:0016020	DNA metabolic process [GO:0006259]	membrane [GO:0016020]; nucleus [GO:0005634]		Q9FHA3	AT5G67100
A0A2K3LB74	Trifolium	-0.192	0.432763	0.962	Unchanged	Periodic tryptophan protein 2	GO:0005634		nucleus [GO:0005634]		Q8VYZ5	AT1G15440
A0A2K3LB90	Trifolium	-0.265	0.261267	0.948	Unchanged	Protein PELOTA-like	GO:0070481; GO:0070966; GO:0071025	nuclear-transcribed mRNA catabolic process, no-go decay [GO:0070966]; nuclear-transcribed mRNA catabolic process, non-stop decay [GO:0070481]; RNA surveillance [GO:0071025]			Q9ZT87	AT4G27650
A0A2K3LBA4	Trifolium	0.403	0.163096	0.931	Unchanged	60S ribosomal protein l7-1-like	GO:0005840		ribosome [GO:0005840]		Q9SAI5	AT1G80750
A0A2K3LBC5	Trifolium	0.278	0.416297	0.961	Unchanged	glucan endo-1,3-beta-D-glucosidase (EC 3.2.1.39) ((1->3)-beta-glucan endohydrolase) (Beta-1,3-endoglucanase)	GO:0005975; GO:0042973	carbohydrate metabolic process [GO:0005975]		glucan endo-1,3-beta-D-glucosidase activity [GO:0042973]	Q9FJU9	AT5G56590
A0A2K3LBC9	Trifolium	-0.624	0.11475	0.914	Unchanged	Mitochondrial outer membrane protein porin 4-like	GO:0005741; GO:0008308		mitochondrial outer membrane [GO:0005741]	voltage-gated monoatomic anion channel activity [GO:0008308]	Q9FKM2	AT5G57490
A0A2K3LBD0	Trifolium	-0.334	0.395276	0.96	Unchanged	Mitochondrial substrate carrier family protein c-like					Q8VZP7	AT2G35800
A0A2K3LBD3	Trifolium	1.28	0.00112083	0.363	Up-regulated	Eukaryotic translation initiation factor 3 subunit c-like protein	GO:0003723; GO:0003743; GO:0005852; GO:0031369		eukaryotic translation initiation factor 3 complex [GO:0005852]	RNA binding [GO:0003723]; translation initiation factor activity [GO:0003743]; translation initiation factor binding [GO:0031369]	O49160	AT3G56150
A0A2K3LBD7	Trifolium	-0.0198	0.916852	0.977	Unchanged	60S ribosomal protein L36	GO:0003735; GO:0005840; GO:0006412; GO:1990904	translation [GO:0006412]	ribonucleoprotein complex [GO:1990904]; ribosome [GO:0005840]	structural constituent of ribosome [GO:0003735]	Q9LZ57	AT5G02450
A0A2K3LBF1	Trifolium	-0.244	0.783212	0.974	Unchanged	XH/XS domain protein	GO:0080188	gene silencing by RNA-directed DNA methylation [GO:0080188]			Q8VZ79	AT3G48670
A0A2K3LBF2	Trifolium	0.0325	0.910223	0.976	Unchanged	Aspartic proteinase nepenthesin-1-like protein	GO:0004190; GO:0006508	proteolysis [GO:0006508]		aspartic-type endopeptidase activity [GO:0004190]	Q9M2U7	AT3G54400
A0A2K3LBH3	Trifolium	0.502	0.0947038	0.903	Unchanged	NADH dehydrogenase	GO:0046872; GO:0051536			iron-sulfur cluster binding [GO:0051536]; metal ion binding [GO:0046872]	O22769	AT4G02580
A0A2K3LBH8	Trifolium	-0.115	0.920243	0.977	Unchanged	GAG-pre-integrase domain-containing protein					Q84JT5	AT1G21280
A0A2K3LBJ3	Trifolium	-2.06	0.0111926	0.675	Down-regulated	Putative acyl-activating enzyme chloroplastic-like					Q8W471	AT4G14070
A0A2K3LBJ4	Trifolium	-0.0857	0.704096	0.972	Unchanged	Calcium-dependent protein kinase 3-like protein	GO:0004674; GO:0005524; GO:0016310	phosphorylation [GO:0016310]		ATP binding [GO:0005524]; protein serine/threonine kinase activity [GO:0004674]	Q42479	AT4G23650
A0A2K3LBK1	Trifolium	0.123	0.751871	0.973	Unchanged	Membrane-associated 30 kDa protein					A0A178W0D3	#N/A
A0A2K3LBK5	Trifolium	0.185	0.610816	0.969	Unchanged	Xyloglucan xylosyltransferase	GO:0000139; GO:0016757		Golgi membrane [GO:0000139]	glycosyltransferase activity [GO:0016757]	Q9LZJ3	AT3G62720
A0A2K3LBL3	Trifolium	-0.841	0.143262	0.925	Unchanged	Folate receptor-like domain-containing protein	GO:0016020		membrane [GO:0016020]		Q94BQ5	AT5G27830
A0A2K3LBL5	Trifolium	0.0509	0.783493	0.974	Unchanged	Cysteine-tRNA ligase-like protein	GO:0005524; GO:0016874			ATP binding [GO:0005524]; ligase activity [GO:0016874]	B3LFA4	AT5G38830
A0A2K3LBN8	Trifolium	0.264	0.32635	0.955	Unchanged	Ubiquitin fusion degradation protein	GO:0006511	ubiquitin-dependent protein catabolic process [GO:0006511]			Q8W1E7	#N/A
A0A2K3LBP4	Trifolium	-1.59	0.0493536	0.855	Down-regulated	Pectinesterase (EC 3.1.1.11)	GO:0030599; GO:0042545; GO:0045330; GO:0045490	cell wall modification [GO:0042545]; pectin catabolic process [GO:0045490]		aspartyl esterase activity [GO:0045330]; pectinesterase activity [GO:0030599]	O49006	AT3G14310
A0A2K3LBR7	Trifolium	-0.574	0.173548	0.933	Unchanged	GDSL esterase/lipase					Q9SXB7	AT1G11320
A0A2K3LBR8	Trifolium	-0.817	0.007225	0.63	Down-regulated	Cellulose synthase A catalytic subunit 1	GO:0016020; GO:0016760; GO:0030244	cellulose biosynthetic process [GO:0030244]	membrane [GO:0016020]	cellulose synthase (UDP-forming) activity [GO:0016760]	O48946	AT4G32410
A0A2K3LBS9	Trifolium	-0.44	0.587073	0.969	Unchanged	FAD/NAD(P)-binding oxidoreductase family protein					A0A1P8AWP6	AT1G56000
A0A2K3LBT4	Trifolium	-0.49	0.244676	0.946	Unchanged	Putative carboxylesterase 2-like protein	GO:0016787			hydrolase activity [GO:0016787]	Q9SX78	AT1G47480
A0A2K3LBV3	Trifolium	-0.248	0.655584	0.971	Unchanged	Peroxidase (EC 1.11.1.7)	GO:0005576; GO:0006979; GO:0020037; GO:0042744; GO:0046872; GO:0140825	hydrogen peroxide catabolic process [GO:0042744]; response to oxidative stress [GO:0006979]	extracellular region [GO:0005576]	heme binding [GO:0020037]; lactoperoxidase activity [GO:0140825]; metal ion binding [GO:0046872]	P24102	AT2G38380
A0A2K3LBV4	Trifolium	0.377	0.489884	0.965	Unchanged	chorismate mutase (EC 5.4.99.5)	GO:0004106; GO:0008652; GO:0009073; GO:0046417	amino acid biosynthetic process [GO:0008652]; aromatic amino acid family biosynthetic process [GO:0009073]; chorismate metabolic process [GO:0046417]		chorismate mutase activity [GO:0004106]	P42738	AT3G29200
A0A2K3LBV7	Trifolium	0.13	0.756435	0.973	Unchanged	U3 small nucleolar RNA-associated protein 15	GO:0005730; GO:0006364	rRNA processing [GO:0006364]	nucleolus [GO:0005730]		O82266	AT2G47990
A0A2K3LBW1	Trifolium	0.445	0.379273	0.959	Unchanged	Fatty acyl-CoA reductase (EC 1.2.1.84)	GO:0006629; GO:0080019; GO:0102965	lipid metabolic process [GO:0006629]		alcohol-forming long-chain fatty acyl-CoA reductase activity [GO:0102965]; alcohol-forming very long-chain fatty acyl-CoA reductase activity [GO:0080019]	Q08891	AT3G11980
A0A2K3LBX0	Trifolium	-0.111	0.827401	0.975	Unchanged	Elongator complex protein 2	GO:0002098; GO:0005634; GO:0005737; GO:0033588	tRNA wobble uridine modification [GO:0002098]	cytoplasm [GO:0005737]; elongator holoenzyme complex [GO:0033588]; nucleus [GO:0005634]		F4I1S7	AT1G49540
A0A2K3LBX5	Trifolium	-0.681	0.232104	0.944	Unchanged	inorganic diphosphatase (EC 3.6.1.1)	GO:0000287; GO:0004427; GO:0005737; GO:0006796	phosphate-containing compound metabolic process [GO:0006796]	cytoplasm [GO:0005737]	inorganic diphosphate phosphatase activity [GO:0004427]; magnesium ion binding [GO:0000287]	Q9LFF9	AT3G53620
A0A2K3LBX9	Trifolium	0.0815	0.883224	0.976	Unchanged	14-3-3-like protein b-like					F4KGV2	#N/A
A0A2K3LBY0	Trifolium	1.84	0.0211166	0.758	Up-regulated	Germin-like protein	GO:0030145; GO:0048046		apoplast [GO:0048046]	manganese ion binding [GO:0030145]	Q9FIC6	AT5G39150
A0A2K3LBY6	Trifolium	-0.922	0.101493	0.907	Unchanged	Nuclear speckle splicing regulatory protein 1 N-terminal domain-containing protein	GO:0000381	regulation of alternative mRNA splicing, via spliceosome [GO:0000381]			Q8S8I5	AT2G27285
A0A2K3LBZ1	Trifolium	-1.09	0.0059132	0.606	Down-regulated	DNA-directed DNA polymerase (EC 2.7.7.7)	GO:0000166; GO:0003677; GO:0003887; GO:0005634; GO:0006260	DNA replication [GO:0006260]	nucleus [GO:0005634]	DNA binding [GO:0003677]; DNA-directed DNA polymerase activity [GO:0003887]; nucleotide binding [GO:0000166]	Q9FHA3	AT5G67100
A0A2K3LC06	Trifolium	-1.61	0.0689306	0.882	Unchanged	Cytochrome p450	GO:0004497; GO:0005506; GO:0016020; GO:0016705; GO:0020037		membrane [GO:0016020]	heme binding [GO:0020037]; iron ion binding [GO:0005506]; monooxygenase activity [GO:0004497]; oxidoreductase activity, acting on paired donors, with incorporation or reduction of molecular oxygen [GO:0016705]	Q9SZ46	AT4G31940
A0A2K3LC16	Trifolium	1.5	0.184565	0.936	Unchanged	allene-oxide cyclase (EC 5.3.99.6)	GO:0009507; GO:0009695; GO:0046423	jasmonic acid biosynthetic process [GO:0009695]	chloroplast [GO:0009507]	allene-oxide cyclase activity [GO:0046423]	Q93ZC5	AT1G13280
A0A2K3LC20	Trifolium	0.46	0.5008	0.965	Unchanged	GDSL esterase/lipase	GO:0016788			hydrolase activity, acting on ester bonds [GO:0016788]	Q9LIN2	AT3G26430
A0A2K3LC26	Trifolium	-0.0704	0.905317	0.976	Unchanged	Cellulose synthase-like protein g1-like	GO:0016020; GO:0016760; GO:0030244	cellulose biosynthetic process [GO:0030244]	membrane [GO:0016020]	cellulose synthase (UDP-forming) activity [GO:0016760]	Q8RX83	AT2G32530
A0A2K3LC28	Trifolium	0.478	0.33712	0.956	Unchanged	Subtilisin-like protease-like protein	GO:0004252; GO:0005576; GO:0006508	proteolysis [GO:0006508]	extracellular region [GO:0005576]	serine-type endopeptidase activity [GO:0004252]	Q9FHA4	AT5G67090
A0A2K3LC34	Trifolium	-1.01	0.123499	0.918	Unchanged	ABC transporter I family member 20-like protein	GO:0005524; GO:0016887			ATP binding [GO:0005524]; ATP hydrolysis activity [GO:0016887]	Q9LZ98	AT5G02270
A0A2K3LC43	Trifolium	0.244	0.736932	0.973	Unchanged	L-gulonolactone oxidase (EC 1.1.3.8)	GO:0003885; GO:0016020; GO:0019853; GO:0050105	L-ascorbic acid biosynthetic process [GO:0019853]	membrane [GO:0016020]	D-arabinono-1,4-lactone oxidase activity [GO:0003885]; L-gulonolactone oxidase activity [GO:0050105]	O81032	AT2G46760
A0A2K3LCC1	Trifolium	0.0846	0.800327	0.974	Unchanged	Exosome complex component rrp4-like protein	GO:0000178; GO:0003723; GO:0005634		exosome (RNase complex) [GO:0000178]; nucleus [GO:0005634]	RNA binding [GO:0003723]	Q9ZVT7	AT1G03360
A0A2K3LCC2	Trifolium	-0.0129	0.966017	0.977	Unchanged	Methyltransferase (EC 2.1.1.-)	GO:0008168; GO:0016020; GO:0032259	methylation [GO:0032259]	membrane [GO:0016020]	methyltransferase activity [GO:0008168]	Q9ZPH9	AT4G00750
A0A2K3LCC8	Trifolium	-1.14	0.00579302	0.603	Down-regulated	carotenoid 9,10-dioxygenase (EC 1.14.99.n4)	GO:0016702; GO:0046872			metal ion binding [GO:0046872]; oxidoreductase activity, acting on single donors with incorporation of molecular oxygen, incorporation of two atoms of oxygen [GO:0016702]	O65572	AT3G63520
A0A2K3LCD1	Trifolium	-0.332	0.0736649	0.887	Unchanged	Phosphoserine aminotransferase (EC 2.6.1.52)	GO:0004648; GO:0006564	L-serine biosynthetic process [GO:0006564]		O-phospho-L-serine:2-oxoglutarate aminotransferase activity [GO:0004648]	Q96255	AT4G35630
A0A2K3LCD3	Trifolium	0.208	0.732989	0.973	Unchanged	Inositol-tetrakisphosphate 1-kinase (EC 2.7.1.134)	GO:0000287; GO:0005524; GO:0016310; GO:0032957; GO:0047325; GO:0052725; GO:0052726	inositol trisphosphate metabolic process [GO:0032957]; phosphorylation [GO:0016310]		ATP binding [GO:0005524]; inositol tetrakisphosphate 1-kinase activity [GO:0047325]; inositol-1,3,4-trisphosphate 5-kinase activity [GO:0052726]; inositol-1,3,4-trisphosphate 6-kinase activity [GO:0052725]; magnesium ion binding [GO:0000287]	Q9SBA5	AT5G16760
A0A2K3LCD9	Trifolium	0.176	0.814069	0.975	Unchanged	Uncharacterized protein	GO:0005769; GO:0005802; GO:0006887; GO:0048768	exocytosis [GO:0006887]; root hair cell tip growth [GO:0048768]	early endosome [GO:0005769]; trans-Golgi network [GO:0005802]		Q9FHY8	AT5G41950
A0A2K3LCF3	Trifolium	-1.43	0.0819768	0.894	Unchanged	S-adenosylmethionine-dependent methyltransferase	GO:0008168; GO:0032259	methylation [GO:0032259]		methyltransferase activity [GO:0008168]	Q0WPT7	AT2G41040
A0A2K3LCF8	Trifolium	-0.45	0.19962	0.939	Unchanged	Cop9 signalosome complex subunit 4-like protein					Q8L5U0	AT5G42970
A0A2K3LCI9	Trifolium	-1.22	0.115695	0.914	Unchanged	Kinase interacting protein	GO:0003779; GO:0016301; GO:0016310	phosphorylation [GO:0016310]		actin binding [GO:0003779]; kinase activity [GO:0016301]	F4IJK1	AT2G22560
A0A2K3LCL8	Trifolium	-0.36	0.11886	0.916	Unchanged	40S ribosomal protein s18-like	GO:0003723; GO:0003735; GO:0005840; GO:0006412; GO:1990904	translation [GO:0006412]	ribonucleoprotein complex [GO:1990904]; ribosome [GO:0005840]	RNA binding [GO:0003723]; structural constituent of ribosome [GO:0003735]	P34788	AT4G09800
A0A2K3LCN0	Trifolium	0.187	0.62381	0.97	Unchanged	Cationic amino acid transporter	GO:0016020; GO:0022857		membrane [GO:0016020]	transmembrane transporter activity [GO:0022857]	Q84MA5	AT4G21120
A0A2K3LCN3	Trifolium	0.332	0.205974	0.94	Unchanged	AP-4 complex subunit mu-1-like protein	GO:0006886; GO:0016192; GO:0030131	intracellular protein transport [GO:0006886]; vesicle-mediated transport [GO:0016192]	clathrin adaptor complex [GO:0030131]		F4JQY9	#N/A
A0A2K3LCQ0	Trifolium	1.05	0.151477	0.928	Unchanged	Ras-related protein RABA6a-like	GO:0003924; GO:0005525			GTP binding [GO:0005525]; GTPase activity [GO:0003924]	Q0WQN4	AT1G18200
A0A2K3LCT3	Trifolium	-1.35	0.0491547	0.855	Down-regulated	Putative serine protease EDA2-like protein	GO:0006508; GO:0070008	proteolysis [GO:0006508]		serine-type exopeptidase activity [GO:0070008]	Q683F9	AT4G36195
A0A2K3LCU8	Trifolium	-0.457	0.0923809	0.902	Unchanged	Methylenetetrahydrofolate reductase	GO:0004489; GO:0006555; GO:0035999	methionine metabolic process [GO:0006555]; tetrahydrofolate interconversion [GO:0035999]		methylenetetrahydrofolate reductase (NAD(P)H) activity [GO:0004489]	F4JAK1	#N/A
A0A2K3LCV4	Trifolium	0.226	0.294562	0.952	Unchanged	Arsenical pump-driving ATPase-like protein	GO:0005524; GO:0016887			ATP binding [GO:0005524]; ATP hydrolysis activity [GO:0016887]	A1L4Y1	AT3G10350
A0A2K3LCW4	Trifolium	-0.989	0.0285898	0.798	Down-regulated	DNA ligase 1-like protein	GO:0003677; GO:0003910; GO:0005524; GO:0006260; GO:0006281; GO:0006310	DNA recombination [GO:0006310]; DNA repair [GO:0006281]; DNA replication [GO:0006260]		ATP binding [GO:0005524]; DNA binding [GO:0003677]; DNA ligase (ATP) activity [GO:0003910]	Q42572	AT1G08130
A0A2K3LCW9	Trifolium	0.425	0.470768	0.964	Unchanged	D-glycerate dehydrogenase/hydroxypyruvate reductase	GO:0016616; GO:0051287			NAD binding [GO:0051287]; oxidoreductase activity, acting on the CH-OH group of donors, NAD or NADP as acceptor [GO:0016616]	Q9C9W5	AT1G68010
A0A2K3LCX8	Trifolium	-0.0951	0.824107	0.975	Unchanged	phosphomevalonate kinase (EC 2.7.4.2)	GO:0005524; GO:0016301; GO:0016310	phosphorylation [GO:0016310]		ATP binding [GO:0005524]; kinase activity [GO:0016301]	Q9C6T1	AT1G31910
A0A2K3LCY1	Trifolium	-1.26	0.063565	0.876	Unchanged	Dirigent protein	GO:0009699; GO:0048046	phenylpropanoid biosynthetic process [GO:0009699]	apoplast [GO:0048046]		Q9C523	AT1G58170
A0A2K3LCY3	Trifolium	0.109	0.60948	0.969	Unchanged	dihydrolipoyllysine-residue succinyltransferase (EC 2.3.1.61)	GO:0006099; GO:0016746	tricarboxylic acid cycle [GO:0006099]		acyltransferase activity [GO:0016746]	Q8H107	AT4G26910
A0A2K3LD07	Trifolium	-0.0586	0.821445	0.975	Unchanged	40S ribosomal protein s18-like	GO:0003723; GO:0003735; GO:0005840; GO:0006412; GO:1990904	translation [GO:0006412]	ribonucleoprotein complex [GO:1990904]; ribosome [GO:0005840]	RNA binding [GO:0003723]; structural constituent of ribosome [GO:0003735]	P34788	AT4G09800
A0A2K3LD36	Trifolium	-0.493	0.117466	0.915	Unchanged	Trafficking protein particle complex subunit 8-like protein					F4KCQ9	AT5G16280
A0A2K3LD72	Trifolium	-0.523	0.170542	0.933	Unchanged	Monoglyceride lipase					Q8VZV6	AT5G19290
A0A2K3LDA4	Trifolium	0.104	0.728705	0.973	Unchanged	Srp40 C-terminal domain-containing protein	GO:0005730		nucleolus [GO:0005730]		A0A1R7T3I7	AT5G57120
A0A2K3LDA9	Trifolium	-0.365	0.166301	0.932	Unchanged	Uncharacterized protein					Q8RWC3	AT3G19340
A0A2K3LDB2	Trifolium	0.651	0.185032	0.936	Unchanged	UPF0481 plant-like protein	GO:0016020		membrane [GO:0016020]		Q9SN06	AT3G50120
A0A2K3LDB4	Trifolium	-0.213	0.735233	0.973	Unchanged	Hydroxycinnamoyl-coenzyme A shikimate/quinate hydroxycinnamoyltransferase	GO:0016740			transferase activity [GO:0016740]	O64470	AT2G19070
A0A2K3LDC6	Trifolium	0.0109	0.966328	0.977	Unchanged	Sulfhydryl oxidase 1-like protein	GO:0016971			flavin-dependent sulfhydryl oxidase activity [GO:0016971]	A0A1P8AZ38	#N/A
A0A2K3LDD3	Trifolium	0.361	0.194253	0.938	Unchanged	Phosphoglycerate kinase (EC 2.7.2.3)	GO:0004618; GO:0005524; GO:0006096; GO:0016310	glycolytic process [GO:0006096]; phosphorylation [GO:0016310]		ATP binding [GO:0005524]; phosphoglycerate kinase activity [GO:0004618]	Q9SAJ4	AT1G79550
A0A2K3LDE6	Trifolium	0.0173	0.96234	0.977	Unchanged	Vacuolar sorting-associated protein 32-like	GO:0007034	vacuolar transport [GO:0007034]			A0A2H1ZE15	#N/A
A0A2K3LDF0	Trifolium	0.0317	0.959744	0.977	Unchanged	Cationic amino acid transporter	GO:0016020; GO:0022857		membrane [GO:0016020]	transmembrane transporter activity [GO:0022857]	Q84MA5	AT4G21120
A0A2K3LDH9	Trifolium	0.132	0.562609	0.968	Unchanged	Protein tyrosine phosphatase PTP1-like	GO:0004725			protein tyrosine phosphatase activity [GO:0004725]	F4IA41	#N/A
A0A2K3LDJ5	Trifolium	-1.86	0.00853499	0.649	Down-regulated	peroxidase (EC 1.11.1.7)	GO:0006979; GO:0020037; GO:0046872; GO:0140825	response to oxidative stress [GO:0006979]		heme binding [GO:0020037]; lactoperoxidase activity [GO:0140825]; metal ion binding [GO:0046872]	Q96510	AT3G49960
A0A2K3LDK4	Trifolium	-0.477	0.18981	0.937	Unchanged	Syntaxin-81-like protein	GO:0015031; GO:0016020	protein transport [GO:0015031]	membrane [GO:0016020]		A0A1P8AWG1	#N/A
A0A2K3LDL9	Trifolium	0.191	0.748733	0.973	Unchanged	Aminotransferase y4uB	GO:0008483			transaminase activity [GO:0008483]	Q94CE5	AT3G22200
A0A2K3LDM5	Trifolium	1.25	0.0196556	0.747	Up-regulated	DNA repair protein rad23-1					F4IF83	#N/A
A0A2K3LDN2	Trifolium	0.629	0.100691	0.907	Unchanged	Bifunctional epoxide hydrolase 2-like protein	GO:0004301			epoxide hydrolase activity [GO:0004301]	O81299	AT4G02340
A0A2K3LDN9	Trifolium	0.0897	0.821924	0.975	Unchanged	ENTH/VHS/GAT family protein	GO:0035091; GO:0043130; GO:0043328	protein transport to vacuole involved in ubiquitin-dependent protein catabolic process via the multivesicular body sorting pathway [GO:0043328]		phosphatidylinositol binding [GO:0035091]; ubiquitin binding [GO:0043130]	Q9LNC6	AT1G06210
A0A2K3LDQ4	Trifolium	-1.07	0.136656	0.923	Unchanged	Cellulose synthase-like protein h1-like	GO:0016020; GO:0016760; GO:0030244	cellulose biosynthetic process [GO:0030244]	membrane [GO:0016020]	cellulose synthase (UDP-forming) activity [GO:0016760]	A0A1P8B5F8	#N/A
A0A2K3LDR0	Trifolium	0.176	0.621463	0.97	Unchanged	PPM-type phosphatase domain-containing protein	GO:0004722			protein serine/threonine phosphatase activity [GO:0004722]	A0A1I9LMW1	#N/A
A0A2K3LDS2	Trifolium	0.159	0.637129	0.97	Unchanged	Auxin-induced in root cultures protein 12-like	GO:0016020; GO:0046872		membrane [GO:0016020]	metal ion binding [GO:0046872]	Q9FGK4	AT5G47530
A0A2K3LDS4	Trifolium	0.275	0.532983	0.967	Unchanged	Ubiquitin carboxyl-terminal hydrolase isozyme L3-like protein	GO:0004843; GO:0006511	ubiquitin-dependent protein catabolic process [GO:0006511]		cysteine-type deubiquitinase activity [GO:0004843]	Q8GWE1	AT4G17510
A0A2K3LDS7	Trifolium	1.08	0.142012	0.925	Unchanged	Hydroxycinnamoyl-coenzyme A shikimate/quinate hydroxycinnamoyltransferase	GO:0016740			transferase activity [GO:0016740]	O64470	AT2G19070
A0A2K3LDS8	Trifolium	-0.435	0.463254	0.964	Unchanged	Protein L-isoaspartate O-methyltransferase-like	GO:0004719; GO:0032259; GO:0036211	methylation [GO:0032259]; protein modification process [GO:0036211]		protein-L-isoaspartate (D-aspartate) O-methyltransferase activity [GO:0004719]	A0A1I9LP19	#N/A
A0A2K3LDT1	Trifolium	-0.629	0.255226	0.947	Unchanged	Xyloglucan endotransglucosylase/hydrolase (EC 2.4.1.207)	GO:0004553; GO:0010411; GO:0016762; GO:0042546; GO:0048046; GO:0071555	cell wall biogenesis [GO:0042546]; cell wall organization [GO:0071555]; xyloglucan metabolic process [GO:0010411]	apoplast [GO:0048046]	hydrolase activity, hydrolyzing O-glycosyl compounds [GO:0004553]; xyloglucan:xyloglucosyl transferase activity [GO:0016762]	Q38910	AT4G25810
A0A2K3LDU5	Trifolium	-0.426	0.242794	0.946	Unchanged	BTB/POZ domain-containing protein pob1-like					Q9FPW6	AT3G61600
A0A2K3LDU9	Trifolium	0.635	0.0910249	0.901	Unchanged	Rae1-like protein					Q38942	AT1G80670
A0A2K3LDW4	Trifolium	0.927	0.256201	0.948	Unchanged	Asparagine synthetase					Q93V62	AT4G27450
A0A2K3LDX4	Trifolium	-0.112	0.603662	0.969	Unchanged	26S protease regulatory subunit 6a-like protein	GO:0000502; GO:0005524; GO:0006508; GO:0008233; GO:0016887	proteolysis [GO:0006508]	proteasome complex [GO:0000502]	ATP binding [GO:0005524]; ATP hydrolysis activity [GO:0016887]; peptidase activity [GO:0008233]	Q9SEI2	AT3G05530
A0A2K3LDZ2	Trifolium	-1.25	0.0181779	0.735	Down-regulated	mTERF protein	GO:0003690; GO:0005737; GO:0006353; GO:0006355; GO:0043231	DNA-templated transcription termination [GO:0006353]; regulation of DNA-templated transcription [GO:0006355]	cytoplasm [GO:0005737]; intracellular membrane-bounded organelle [GO:0043231]	double-stranded DNA binding [GO:0003690]	Q9SD94	AT5G07900
A0A2K3LE00	Trifolium	-0.63	0.497425	0.965	Unchanged	Vacuolar-processing enzyme-like protein	GO:0004197; GO:0051603	proteolysis involved in protein catabolic process [GO:0051603]		cysteine-type endopeptidase activity [GO:0004197]	Q39119	AT4G32940
A0A2K3LE01	Trifolium	1.16	0.00867062	0.65	Up-regulated	Uncharacterized protein					F4I7R5	AT1G24090
A0A2K3LE15	Trifolium	0.587	0.209426	0.941	Unchanged	Dihydroflavonol 4-reductase-like protein	GO:0009788; GO:0016487; GO:0047886	farnesol metabolic process [GO:0016487]; negative regulation of abscisic acid-activated signaling pathway [GO:0009788]		farnesol dehydrogenase activity [GO:0047886]	F4JIW8	#N/A
A0A2K3LE32	Trifolium	-1.54	0.10333	0.908	Unchanged	SET domain-containing protein					A0A1P8ATV6	#N/A
A0A2K3LE43	Trifolium	0.197	0.675233	0.971	Unchanged	Glutaredoxin-dependent peroxiredoxin (EC 1.11.1.25)	GO:0008379; GO:0034599	cellular response to oxidative stress [GO:0034599]		thioredoxin peroxidase activity [GO:0008379]	Q9XEX2	AT1G65980
A0A2K3LE48	Trifolium	1.3	0.0136132	0.696	Up-regulated	UDP-glycosyltransferase 71D1-like protein	GO:0008194; GO:0046527			glucosyltransferase activity [GO:0046527]; UDP-glycosyltransferase activity [GO:0008194]	O82383	AT2G29730
A0A2K3LE64	Trifolium	0.395	0.285714	0.951	Unchanged	L-ascorbate oxidase	GO:0005507			copper ion binding [GO:0005507]	F4K6Z4	#N/A
A0A2K3LE76	Trifolium	-1.54	0.0455651	0.848	Down-regulated	Epoxide hydrolase	GO:0016787			hydrolase activity [GO:0016787]	A0A1P8B251	AT2G18360
A0A2K3LE87	Trifolium	0.148	0.7454	0.973	Unchanged	Superkiller viralicidic activity 2-like protein	GO:0004386; GO:0005524; GO:0016070; GO:0016787	RNA metabolic process [GO:0016070]		ATP binding [GO:0005524]; helicase activity [GO:0004386]; hydrolase activity [GO:0016787]	Q9XIF2	AT1G59760
A0A2K3LE88	Trifolium	1.13	0.0454429	0.848	Up-regulated	NADH cytochrome b5 reductase	GO:0016020; GO:0016491		membrane [GO:0016020]	oxidoreductase activity [GO:0016491]	Q9ZNT1	AT5G17770
A0A2K3LE95	Trifolium	0.381	0.193715	0.938	Unchanged	Calcium and calmodulin-dependent serine threonine-protein kinase-like protein	GO:0004674; GO:0005524; GO:0016310	phosphorylation [GO:0016310]		ATP binding [GO:0005524]; protein serine/threonine kinase activity [GO:0004674]	Q42396	AT5G23580
A0A2K3LEB2	Trifolium	-0.729	0.453837	0.963	Unchanged	(+)-neomenthol dehydrogenase	GO:0016491			oxidoreductase activity [GO:0016491]	Q9M2E2	AT3G61220
A0A2K3LEB6	Trifolium	-0.278	0.528229	0.966	Unchanged	DUF21 domain-containing protein at4g14240-like protein	GO:0010960; GO:0016020	magnesium ion homeostasis [GO:0010960]	membrane [GO:0016020]		Q67XQ0	AT4G14240
A0A2K3LEC2	Trifolium	-0.311	0.804001	0.974	Unchanged	Aspartic proteinase-like protein	GO:0004190; GO:0005764; GO:0006508; GO:0006665	proteolysis [GO:0006508]; sphingolipid metabolic process [GO:0006665]	lysosome [GO:0005764]	aspartic-type endopeptidase activity [GO:0004190]	A0A1P8AVE7	#N/A
A0A2K3LEC9	Trifolium	-0.126	0.910469	0.976	Unchanged	F-box/RNI superfamily protein					#N/A	#N/A
A0A2K3LED6	Trifolium	-0.879	0.00797813	0.641	Down-regulated	Putative serine threonine-protein kinase	GO:0004672; GO:0005524; GO:0009742; GO:0016310	brassinosteroid mediated signaling pathway [GO:0009742]; phosphorylation [GO:0016310]		ATP binding [GO:0005524]; protein kinase activity [GO:0004672]	Q944A7	AT4G35230
A0A2K3LEE4	Trifolium	-0.249	0.570061	0.968	Unchanged	U4/U6 small nuclear ribonucleoprotein Prp31-like	GO:0000244; GO:0003723; GO:0005681; GO:0046540	spliceosomal tri-snRNP complex assembly [GO:0000244]	spliceosomal complex [GO:0005681]; U4/U6 x U5 tri-snRNP complex [GO:0046540]	RNA binding [GO:0003723]	Q8RXN6	AT1G60170
A0A2K3LEE6	Trifolium	0.366	0.450876	0.963	Unchanged	Chaperone protein dnaJ					Q9FGY8	AT5G49580
A0A2K3LEE9	Trifolium	-1.15	0.0832707	0.895	Unchanged	Peroxisomal acyl-CoA oxidase 1-like protein	GO:0003997; GO:0005777; GO:0006635; GO:0071949	fatty acid beta-oxidation [GO:0006635]	peroxisome [GO:0005777]	acyl-CoA oxidase activity [GO:0003997]; FAD binding [GO:0071949]	F4JMK8	#N/A
A0A2K3LEG3	Trifolium	-1.61	0.0142949	0.703	Down-regulated	proteasome endopeptidase complex (EC 3.4.25.1)	GO:0004298; GO:0005839; GO:0051603	proteolysis involved in protein catabolic process [GO:0051603]	proteasome core complex [GO:0005839]	threonine-type endopeptidase activity [GO:0004298]	O23717	AT1G13060
A0A2K3LEH1	Trifolium	0.0658	0.722946	0.973	Unchanged	Sulfite reductase (Ferredoxin) protein	GO:0016491; GO:0020037; GO:0051536			heme binding [GO:0020037]; iron-sulfur cluster binding [GO:0051536]; oxidoreductase activity [GO:0016491]	Q9LZ66	AT5G04590
A0A2K3LEH4	Trifolium	-1.47	0.0205658	0.754	Down-regulated	Histone H2A	GO:0000786; GO:0003677; GO:0005634; GO:0030527; GO:0046982		nucleosome [GO:0000786]; nucleus [GO:0005634]	DNA binding [GO:0003677]; protein heterodimerization activity [GO:0046982]; structural constituent of chromatin [GO:0030527]	Q9S9K7	AT1G54690
A0A2K3LEH9	Trifolium	-0.0398	0.803871	0.974	Unchanged	Serine/threonine protein phosphatase BSL1-like protein	GO:0005634; GO:0016787		nucleus [GO:0005634]	hydrolase activity [GO:0016787]	Q8L7U5	AT4G03080
A0A2K3LEP3	Trifolium	-0.93	0.184198	0.936	Unchanged	Chaperone protein dnaJ mitochondrial-like	GO:0006457; GO:0051082	protein folding [GO:0006457]		unfolded protein binding [GO:0051082]	A0A1P8APZ8	#N/A
A0A2K3LER9	Trifolium	0.487	0.287828	0.951	Unchanged	Amine oxidase (EC 1.4.3.-)	GO:0005507; GO:0009308; GO:0042221; GO:0048038; GO:0052593; GO:0052594; GO:0052596	amine metabolic process [GO:0009308]; response to chemical [GO:0042221]		aminoacetone:oxygen oxidoreductase(deaminating) activity [GO:0052594]; copper ion binding [GO:0005507]; phenethylamine:oxygen oxidoreductase (deaminating) activity [GO:0052596]; quinone binding [GO:0048038]; tryptamine:oxygen oxidoreductase (deaminating) activity [GO:0052593]	F4IAX1	AT1G31710
A0A2K3LES5	Trifolium	0.324	0.731868	0.973	Unchanged	pyruvate decarboxylase (EC 4.1.1.1)	GO:0000287; GO:0004737; GO:0030976			magnesium ion binding [GO:0000287]; pyruvate decarboxylase activity [GO:0004737]; thiamine pyrophosphate binding [GO:0030976]	Q9M040	AT5G01320
A0A2K3LEU0	Trifolium	-0.209	0.372624	0.958	Unchanged	Aspartyl aminopeptidase	GO:0004177; GO:0006508; GO:0008237; GO:0008270	proteolysis [GO:0006508]		aminopeptidase activity [GO:0004177]; metallopeptidase activity [GO:0008237]; zinc ion binding [GO:0008270]	Q9LST0	AT5G60160
A0A2K3LEV5	Trifolium	0.439	0.287489	0.951	Unchanged	ABC transporter G family member 36-like protein	GO:0005524; GO:0016887; GO:0140359			ABC-type transporter activity [GO:0140359]; ATP binding [GO:0005524]; ATP hydrolysis activity [GO:0016887]	Q94A18	AT3G16340
A0A2K3LEW7	Trifolium	-0.258	0.726208	0.973	Unchanged	Lysosomal alpha-mannosidase-like protein	GO:0004559; GO:0006013	mannose metabolic process [GO:0006013]		alpha-mannosidase activity [GO:0004559]	A0A1P8BFL6	#N/A
A0A2K3LEX2	Trifolium	0.442	0.11093	0.912	Unchanged	GTP-binding nuclear protein	GO:0003924; GO:0005525; GO:0005634; GO:0006913; GO:0015031	nucleocytoplasmic transport [GO:0006913]; protein transport [GO:0015031]	nucleus [GO:0005634]	GTP binding [GO:0005525]; GTPase activity [GO:0003924]	Q8H156	AT5G55190
A0A2K3LEX7	Trifolium	1.13	0.152053	0.928	Unchanged	MATE efflux family protein FRD3-like	GO:0016020		membrane [GO:0016020]		A0A1P8AU65	#N/A
A0A2K3LEY3	Trifolium	-0.137	0.586516	0.969	Unchanged	PTI1-like tyrosine-protein kinase	GO:0004672; GO:0005524; GO:0016310; GO:0050896	phosphorylation [GO:0016310]; response to stimulus [GO:0050896]		ATP binding [GO:0005524]; protein kinase activity [GO:0004672]	Q9SSQ6	AT1G52540
A0A2K3LEY9	Trifolium	0.235	0.408503	0.961	Unchanged	Putative carboxylesterase 11-like protein	GO:0016787			hydrolase activity [GO:0016787]	Q9LK21	AT3G27320
A0A2K3LF09	Trifolium	-0.254	0.699812	0.972	Unchanged	Polyol transporter 5-like protein	GO:0016020; GO:0022857		membrane [GO:0016020]	transmembrane transporter activity [GO:0022857]	Q8VZ80	AT3G18830
A0A2K3LF12	Trifolium	0.152	0.538203	0.967	Unchanged	Uncharacterized protein					F4IMW2	AT2G36360
A0A2K3LF38	Trifolium	-0.0932	0.712716	0.972	Unchanged	60S ribosomal protein l10-like	GO:0003735; GO:0005840; GO:0006412; GO:0009507; GO:1990904	translation [GO:0006412]	chloroplast [GO:0009507]; ribonucleoprotein complex [GO:1990904]; ribosome [GO:0005840]	structural constituent of ribosome [GO:0003735]	Q08770	AT1G26910
A0A2K3LF51	Trifolium	-0.781	0.164898	0.931	Unchanged	Cycloartenol synthase-like protein	GO:0005811; GO:0016104; GO:0031559	triterpenoid biosynthetic process [GO:0016104]	lipid droplet [GO:0005811]	oxidosqualene cyclase activity [GO:0031559]	A0A1P8B2H6	#N/A
A0A2K3LF57	Trifolium	0.3	0.625855	0.97	Unchanged	Geranylgeranyl pyrophosphate synthase chloroplastic-like	GO:0008299; GO:0016740; GO:0046872	isoprenoid biosynthetic process [GO:0008299]		metal ion binding [GO:0046872]; transferase activity [GO:0016740]	P34802	AT4G36810
A0A2K3LF73	Trifolium	0.588	0.187441	0.936	Unchanged	Mitochondrial pyruvate carrier	GO:0005743; GO:0006850	mitochondrial pyruvate transmembrane transport [GO:0006850]	mitochondrial inner membrane [GO:0005743]		O49636	AT4G22310
A0A2K3LF79	Trifolium	0.584	0.229598	0.944	Unchanged	Ripening-related protein					#N/A	#N/A
A0A2K3LF86	Trifolium	-0.0441	0.841278	0.975	Unchanged	Mitotic checkpoint protein BUB3					Q9LJN8	AT3G19590
A0A2K3LF88	Trifolium	0.786	0.170799	0.933	Unchanged	Early nodulin-like protein 2-like	GO:0009055; GO:0016020		membrane [GO:0016020]	electron transfer activity [GO:0009055]	Q9LJU1	AT3G20570
A0A2K3LF89	Trifolium	0.374	0.416653	0.961	Unchanged	Isoflavonoid malonyl transferase	GO:0016740			transferase activity [GO:0016740]	Q940Z5	AT5G39050
A0A2K3LF96	Trifolium	-0.977	0.18588	0.936	Unchanged	Acidic mammalian chitinase-like protein	GO:0004553; GO:0005975; GO:0008061	carbohydrate metabolic process [GO:0005975]		chitin binding [GO:0008061]; hydrolase activity, hydrolyzing O-glycosyl compounds [GO:0004553]	O81862	AT4G19810
A0A2K3LFA4	Trifolium	0.214	0.644701	0.97	Unchanged	Cwf19-like protein 2-like					Q93ZX4	AT1G56290
A0A2K3LFB5	Trifolium	0.243	0.259194	0.948	Unchanged	4-hydroxy-tetrahydrodipicolinate synthase (EC 4.3.3.7)	GO:0008840; GO:0009089; GO:0019877	diaminopimelate biosynthetic process [GO:0019877]; lysine biosynthetic process via diaminopimelate [GO:0009089]		4-hydroxy-tetrahydrodipicolinate synthase activity [GO:0008840]	Q9FVC8	AT2G45440
A0A2K3LFC0	Trifolium	-0.815	0.034322	0.819	Down-regulated	Octicosapeptide/phox/Bem1p domain protein					F4IRM4	AT2G25290
A0A2K3LFD9	Trifolium	-0.199	0.457755	0.963	Unchanged	Embryo-specific protein	GO:0005737		cytoplasm [GO:0005737]		Q6NPM5	AT5G62200
A0A2K3LFE3	Trifolium	0.397	0.264055	0.948	Unchanged	26S proteasome non-ATPase regulatory subunit 14-like protein	GO:0000502		proteasome complex [GO:0000502]		A8MR12	#N/A
A0A2K3LFE6	Trifolium	-0.198	0.49471	0.965	Unchanged	Receptor-like protein kinase HSL1-like protein	GO:0004222; GO:0004519; GO:0006364; GO:0016301; GO:0016310; GO:0046872	phosphorylation [GO:0016310]; rRNA processing [GO:0006364]		endonuclease activity [GO:0004519]; kinase activity [GO:0016301]; metal ion binding [GO:0046872]; metalloendopeptidase activity [GO:0004222]	Q8L5Z4	AT2G25870
A0A2K3LFF0	Trifolium	-0.824	0.114286	0.914	Unchanged	Phosphoenolpyruvate carboxylase 4-like protein	GO:0005737; GO:0006099; GO:0008964; GO:0015977	carbon fixation [GO:0015977]; tricarboxylic acid cycle [GO:0006099]	cytoplasm [GO:0005737]	phosphoenolpyruvate carboxylase activity [GO:0008964]	Q8GVE8	AT1G68750
A0A2K3LFF1	Trifolium	-0.218	0.653802	0.971	Unchanged	Anthranilate phosphoribosyltransferase chloroplastic-like	GO:0000162; GO:0004048	tryptophan biosynthetic process [GO:0000162]		anthranilate phosphoribosyltransferase activity [GO:0004048]	Q02166	AT5G17990
A0A2K3LFG9	Trifolium	0.196	0.52185	0.966	Unchanged	Heat shock protein 70 kDa					Q9S7C0	AT1G79930
A0A2K3LFH4	Trifolium	0.0612	0.915017	0.977	Unchanged	Peroxisomal (S)-2-hydroxy-acid oxidase glo1	GO:0009854; GO:0016491	oxidative photosynthetic carbon pathway [GO:0009854]		oxidoreductase activity [GO:0016491]	F4JFV6	#N/A
A0A2K3LFH8	Trifolium	0.442	0.349008	0.957	Unchanged	Uncharacterized protein	GO:0003735; GO:0005739		mitochondrion [GO:0005739]	structural constituent of ribosome [GO:0003735]	Q9FHC3	AT5G52370
A0A2K3LFJ0	Trifolium	0.312	0.191206	0.937	Unchanged	Proteasome activator Blm10 mid region domain-containing protein	GO:0006281; GO:0016504; GO:0070577; GO:0070628	DNA repair [GO:0006281]		lysine-acetylated histone binding [GO:0070577]; peptidase activator activity [GO:0016504]; proteasome binding [GO:0070628]	F4JC97	AT3G13330
A0A2K3LFJ1	Trifolium	-1.16	0.0512885	0.859	Unchanged	Cytochrome p450 84a1-like protein	GO:0004497; GO:0005506; GO:0016020; GO:0016705; GO:0020037		membrane [GO:0016020]	heme binding [GO:0020037]; iron ion binding [GO:0005506]; monooxygenase activity [GO:0004497]; oxidoreductase activity, acting on paired donors, with incorporation or reduction of molecular oxygen [GO:0016705]	Q42600	AT4G36220
A0A2K3LFJ9	Trifolium	-0.163	0.341787	0.956	Unchanged	2-isopropylmalate synthase (EC 2.3.3.13)	GO:0008652; GO:0009082; GO:0046912	amino acid biosynthetic process [GO:0008652]; branched-chain amino acid biosynthetic process [GO:0009082]		acyltransferase activity, acyl groups converted into alkyl on transfer [GO:0046912]	Q9C550	AT1G74040
A0A2K3LFL4	Trifolium	-0.202	0.549431	0.967	Unchanged	Glutaredoxin domain-containing protein	GO:0008757			S-adenosylmethionine-dependent methyltransferase activity [GO:0008757]	Q9SF07	AT3G11920
A0A2K3LFM9	Trifolium	0.993	0.0277853	0.794	Up-regulated	Pathogenesis-related protein p2-like	GO:0004540; GO:0042742; GO:0050832	defense response to bacterium [GO:0042742]; defense response to fungus [GO:0050832]		RNA nuclease activity [GO:0004540]	P43082	AT3G04720
A0A2K3LFN9	Trifolium	-0.551	0.224534	0.943	Unchanged	Aspartate aminotransferase (EC 2.6.1.1)	GO:0004069; GO:0006520; GO:0009058; GO:0030170	amino acid metabolic process [GO:0006520]; biosynthetic process [GO:0009058]		L-aspartate:2-oxoglutarate aminotransferase activity [GO:0004069]; pyridoxal phosphate binding [GO:0030170]	P46643	AT2G30970
A0A2K3LFQ8	Trifolium	0.553	0.224364	0.943	Unchanged	4-hydroxy-tetrahydrodipicolinate synthase (EC 4.3.3.7)	GO:0008840; GO:0009089; GO:0019877	diaminopimelate biosynthetic process [GO:0019877]; lysine biosynthetic process via diaminopimelate [GO:0009089]		4-hydroxy-tetrahydrodipicolinate synthase activity [GO:0008840]	Q9FVC8	AT2G45440
A0A2K3LFR3	Trifolium	0.376	0.109519	0.912	Unchanged	Glycerol kinase	GO:0005975; GO:0016301; GO:0016310	carbohydrate metabolic process [GO:0005975]; phosphorylation [GO:0016310]		kinase activity [GO:0016301]	Q9M8L4	AT1G80460
A0A2K3LFR6	Trifolium	0.749	0.0790431	0.892	Unchanged	glutamate--tRNA ligase (EC 6.1.1.17) (Glutamyl-tRNA synthetase)	GO:0004818; GO:0005524; GO:0005737; GO:0006424; GO:0009791; GO:0048608	glutamyl-tRNA aminoacylation [GO:0006424]; post-embryonic development [GO:0009791]; reproductive structure development [GO:0048608]	cytoplasm [GO:0005737]	ATP binding [GO:0005524]; glutamate-tRNA ligase activity [GO:0004818]	O82462	AT5G26710
A0A2K3LFR7	Trifolium	-0.000967	0.99682	0.978	Unchanged	Exosome complex component rrp4-like protein	GO:0000178; GO:0003723; GO:0005634		exosome (RNase complex) [GO:0000178]; nucleus [GO:0005634]	RNA binding [GO:0003723]	Q9ZVT7	AT1G03360
A0A2K3LFS2	Trifolium	-1.61	0.0169842	0.725	Down-regulated	Serine/threonine protein phosphatase 2A regulatory subunit B subunit gamma-like protein	GO:0000226; GO:0000913; GO:0005737; GO:0030865; GO:0035303	cortical cytoskeleton organization [GO:0030865]; microtubule cytoskeleton organization [GO:0000226]; preprophase band assembly [GO:0000913]; regulation of dephosphorylation [GO:0035303]	cytoplasm [GO:0005737]		Q9FEE2	AT5G18580
A0A2K3LFT6	Trifolium	-0.604	0.156883	0.929	Unchanged	Lipoxygenase	GO:0005737; GO:0006633; GO:0016702; GO:0031408; GO:0034440; GO:0046872	fatty acid biosynthetic process [GO:0006633]; lipid oxidation [GO:0034440]; oxylipin biosynthetic process [GO:0031408]	cytoplasm [GO:0005737]	metal ion binding [GO:0046872]; oxidoreductase activity, acting on single donors with incorporation of molecular oxygen, incorporation of two atoms of oxygen [GO:0016702]	Q06327	AT1G55020
A0A2K3LFV2	Trifolium	0.263	0.556298	0.968	Unchanged	Fumarate hydratase mitochondrial-like	GO:0004333; GO:0006106; GO:0045239	fumarate metabolic process [GO:0006106]	tricarboxylic acid cycle enzyme complex [GO:0045239]	fumarate hydratase activity [GO:0004333]	P93033	AT2G47510
A0A2K3LFW3	Trifolium	-0.168	0.499273	0.965	Unchanged	40S ribosomal protein S30	GO:0003735; GO:0005829; GO:0005840; GO:0006412; GO:1990904	translation [GO:0006412]	cytosol [GO:0005829]; ribonucleoprotein complex [GO:1990904]; ribosome [GO:0005840]	structural constituent of ribosome [GO:0003735]	P49689	AT5G56670
A0A2K3LFY3	Trifolium	0.294	0.683052	0.972	Unchanged	Zinc finger CCHC domain-containing protein					A0A1P8BEL3	#N/A
A0A2K3LFZ0	Trifolium	0.512	0.158659	0.93	Unchanged	Cop9 signalosome complex subunit 4-like protein					Q8L5U0	AT5G42970
A0A2K3LFZ2	Trifolium	-1.78	0.0739224	0.887	Unchanged	Abscisic acid receptor PYL4	GO:0004864; GO:0005737; GO:0005886; GO:0009738	abscisic acid-activated signaling pathway [GO:0009738]	cytoplasm [GO:0005737]; plasma membrane [GO:0005886]	protein phosphatase inhibitor activity [GO:0004864]	O80920	AT2G38310
A0A2K3LFZ5	Trifolium	0.545	0.0372392	0.828	Unchanged	Methionine aminopeptidase 2B-like protein	GO:0004177; GO:0006508; GO:0008757	proteolysis [GO:0006508]		aminopeptidase activity [GO:0004177]; S-adenosylmethionine-dependent methyltransferase activity [GO:0008757]	Q56Y85	AT3G59990
A0A2K3LG04	Trifolium	0.236	0.466473	0.964	Unchanged	Phosphoglucomutase	GO:0004614; GO:0005975	carbohydrate metabolic process [GO:0005975]		phosphoglucomutase activity [GO:0004614]	Q9SGC1	AT1G70730
A0A2K3LG46	Trifolium	-0.156	0.443722	0.963	Unchanged	Transport protein SEC24-1-like	GO:0006886; GO:0006888; GO:0030127	endoplasmic reticulum to Golgi vesicle-mediated transport [GO:0006888]; intracellular protein transport [GO:0006886]	COPII vesicle coat [GO:0030127]		Q9ZQH3	AT2G27460
A0A2K3LG49	Trifolium	-0.14	0.718527	0.972	Unchanged	Hop-interacting protein thi034	GO:0003676; GO:0004523			nucleic acid binding [GO:0003676]; RNA-DNA hybrid ribonuclease activity [GO:0004523]	F4JEB4	AT3G01410
A0A2K3LG61	Trifolium	0.272	0.602012	0.969	Unchanged	Heat shock protein 70 kDa	GO:0005524; GO:0140662			ATP binding [GO:0005524]; ATP-dependent protein folding chaperone [GO:0140662]	Q9S9N1	AT1G16030
A0A2K3LG71	Trifolium	-0.98	0.0449743	0.847	Down-regulated	1-acyl-sn-glycerol-3-phosphate acyltransferase 2-like protein	GO:0016746			acyltransferase activity [GO:0016746]	Q8LG50	AT3G57650
A0A2K3LG91	Trifolium	-3.41	0.000855635	0.327	Down-regulated	Importin subunit beta-1-like protein	GO:0005737; GO:0006606; GO:0031267	protein import into nucleus [GO:0006606]	cytoplasm [GO:0005737]	small GTPase binding [GO:0031267]	Q9FJD4	AT5G53480
A0A2K3LGB5	Trifolium	0.334	0.313505	0.954	Unchanged	Uncharacterized protein					Q9ZVH7	AT2G38550
A0A2K3LGB7	Trifolium	0.0627	0.943899	0.977	Unchanged	chitinase (EC 3.2.1.14)	GO:0004553; GO:0005975	carbohydrate metabolic process [GO:0005975]		hydrolase activity, hydrolyzing O-glycosyl compounds [GO:0004553]	P19172	AT5G24090
A0A2K3LGC1	Trifolium	-0.255	0.584333	0.969	Unchanged	Mitochondria fission 1 protein	GO:0000266; GO:0005741	mitochondrial fission [GO:0000266]	mitochondrial outer membrane [GO:0005741]		Q9M1J1	AT3G57090
A0A2K3LGE0	Trifolium	-0.00707	0.990316	0.978	Unchanged	Pumilio 4-like protein					Q9SS47	AT3G10360
A0A2K3LGE2	Trifolium	1.35	0.0304378	0.805	Up-regulated	Zinc-metallopeptidase peroxisomal-like	GO:0006508; GO:0008237; GO:0046872	proteolysis [GO:0006508]		metal ion binding [GO:0046872]; metallopeptidase activity [GO:0008237]	O22941	AT2G41790
A0A2K3LGF4	Trifolium	-0.639	0.246607	0.946	Unchanged	peroxidase (EC 1.11.1.7)	GO:0006979; GO:0020037; GO:0046872; GO:0140825	response to oxidative stress [GO:0006979]		heme binding [GO:0020037]; lactoperoxidase activity [GO:0140825]; metal ion binding [GO:0046872]	Q96520	AT1G71695
A0A2K3LGF7	Trifolium	-0.115	0.601378	0.969	Unchanged	FRIGIDA-like protein	GO:0009908; GO:0030154	cell differentiation [GO:0030154]; flower development [GO:0009908]			Q9LUV4	AT3G22440
A0A2K3LGH6	Trifolium	-1.08	0.00849634	0.648	Down-regulated	HECT-type E3 ubiquitin transferase (EC 2.3.2.26)	GO:0000209; GO:0061630	protein polyubiquitination [GO:0000209]		ubiquitin protein ligase activity [GO:0061630]	B3H5A6	#N/A
A0A2K3LGH8	Trifolium	0.0659	0.736994	0.973	Unchanged	Putative NADH dehydrogenase	GO:0005743; GO:0022904	respiratory electron transport chain [GO:0022904]	mitochondrial inner membrane [GO:0005743]		Q9FLX7	AT5G52840
A0A2K3LGJ2	Trifolium	0.445	0.0998117	0.906	Unchanged	Putative serine threonine-protein kinase	GO:0004674; GO:0005524; GO:0016310	phosphorylation [GO:0016310]		ATP binding [GO:0005524]; protein serine/threonine kinase activity [GO:0004674]	P0C5E2	AT1G18390
A0A2K3LGJ5	Trifolium	0.785	0.129573	0.92	Unchanged	Calcium-transporting ATPase endoplasmic reticulum-type-like protein	GO:0000166			nucleotide binding [GO:0000166]	Q9SY55	AT1G10130
A0A2K3LGL1	Trifolium	-0.647	0.485573	0.965	Unchanged	Guanine nucleotide-binding protein alpha-2 subunit	GO:0046872			metal ion binding [GO:0046872]	C6KIE6	AT4G34390
A0A2K3LGM8	Trifolium	-0.0678	0.743616	0.973	Unchanged	40S ribosomal protein S8	GO:0003735; GO:0005840; GO:0006412; GO:1990904	translation [GO:0006412]	ribonucleoprotein complex [GO:1990904]; ribosome [GO:0005840]	structural constituent of ribosome [GO:0003735]	Q9FIF3	AT5G59240
A0A2K3LGN7	Trifolium	-1.69	0.177687	0.934	Unchanged	Dirigent protein	GO:0009699; GO:0048046	phenylpropanoid biosynthetic process [GO:0009699]	apoplast [GO:0048046]		Q9SS03	AT1G65870
A0A2K3LGN8	Trifolium	0.523	0.567854	0.968	Unchanged	Calcium-binding EF-hand protein	GO:0005509			calcium ion binding [GO:0005509]	Q9T0I9	AT4G38810
A0A2K3LGP1	Trifolium	-1.54	0.0114767	0.677	Down-regulated	GRAS family transcription factor	GO:0005634; GO:0009610	response to symbiotic fungus [GO:0009610]	nucleus [GO:0005634]		P0C884	AT2G29065
A0A2K3LGP5	Trifolium	-0.313	0.592236	0.969	Unchanged	Pectinesterase (EC 3.1.1.11)	GO:0004857; GO:0005576; GO:0016020; GO:0030599; GO:0042545; GO:0045330; GO:0045490	cell wall modification [GO:0042545]; pectin catabolic process [GO:0045490]	extracellular region [GO:0005576]; membrane [GO:0016020]	aspartyl esterase activity [GO:0045330]; enzyme inhibitor activity [GO:0004857]; pectinesterase activity [GO:0030599]	Q3E8Z8	AT5G27870
A0A2K3LGQ9	Trifolium	0.365	0.309639	0.953	Unchanged	Cytochrome c oxidase subunit 5b mitochondrial-like	GO:0005751; GO:0006123; GO:0046872	mitochondrial electron transport, cytochrome c to oxygen [GO:0006123]	mitochondrial respiratory chain complex IV [GO:0005751]	metal ion binding [GO:0046872]	Q9SSB8	AT1G80230
A0A2K3LGS3	Trifolium	0.624	0.205936	0.94	Unchanged	DNA-directed RNA polymerase iii subunit rpc5	GO:0000428; GO:0005634; GO:0006351	DNA-templated transcription [GO:0006351]	DNA-directed RNA polymerase complex [GO:0000428]; nucleus [GO:0005634]		Q9FGZ3	AT5G49530
A0A2K3LGS7	Trifolium	-1.13	0.0116141	0.678	Down-regulated	DNA damage-binding protein 1-like					B3H6I9	#N/A
A0A2K3LGU6	Trifolium	-0.168	0.551474	0.967	Unchanged	Trans-cinnamate 4-monooxygenase (EC 1.14.14.91) (Cinnamic acid 4-hydroxylase) (Cytochrome P450 73) (Cytochrome P450C4H)	GO:0004497; GO:0005506; GO:0016020; GO:0016705; GO:0020037		membrane [GO:0016020]	heme binding [GO:0020037]; iron ion binding [GO:0005506]; monooxygenase activity [GO:0004497]; oxidoreductase activity, acting on paired donors, with incorporation or reduction of molecular oxygen [GO:0016705]	P92994	AT2G30490
A0A2K3LGW2	Trifolium	-0.61	0.481193	0.964	Unchanged	Phenylalanyl-tRNA ligase chloroplastic/mitochondrial-like	GO:0004826			phenylalanine-tRNA ligase activity [GO:0004826]	Q94K73	AT3G58140
A0A2K3LGY5	Trifolium	-0.566	0.204172	0.94	Unchanged	Bifunctional dethiobiotin synthetase/7,8-diamino-pelargonic acid aminotransferase mitochondrial-like	GO:0008483			transaminase activity [GO:0008483]	B0F481	AT5G57590
A0A2K3LGY7	Trifolium	0.329	0.467184	0.964	Unchanged	Stress up-regulated Nod 19 protein					Q8VZ21	AT5G61820
A0A2K3LH00	Trifolium	-0.879	0.0179685	0.733	Down-regulated	40S ribosomal protein S25	GO:0005840; GO:1990904		ribonucleoprotein complex [GO:1990904]; ribosome [GO:0005840]		Q9SIK2	AT2G21580
A0A2K3LH12	Trifolium	1.06	0.00408813	0.552	Up-regulated	L-gulono-1,4-lactone dehydrogenase-like protein	GO:0003885; GO:0016020; GO:0019853	L-ascorbic acid biosynthetic process [GO:0019853]	membrane [GO:0016020]	D-arabinono-1,4-lactone oxidase activity [GO:0003885]	Q6NQ66	AT2G46750
A0A2K3LH22	Trifolium	-2.25	0.0563569	0.867	Unchanged	Gamma carbonic anhydrase mitochondrial-like					Q9C6B3	AT1G47260
A0A2K3LH32	Trifolium	0.0474	0.895496	0.976	Unchanged	monodehydroascorbate reductase (NADH) (EC 1.6.5.4)	GO:0016491; GO:0050660			flavin adenine dinucleotide binding [GO:0050660]; oxidoreductase activity [GO:0016491]	P92947	AT1G63940
A0A2K3LH33	Trifolium	0.806	0.302595	0.953	Unchanged	Purple acid phosphatase (EC 3.1.3.2)	GO:0003993; GO:0005576; GO:0046872		extracellular region [GO:0005576]	acid phosphatase activity [GO:0003993]; metal ion binding [GO:0046872]	A0A1P8BA48	#N/A
A0A2K3LH34	Trifolium	-0.326	0.399034	0.96	Unchanged	Cell division cycle protein 48	GO:0051301	cell division [GO:0051301]			P54609	AT3G09840
A0A2K3LH41	Trifolium	0.0653	0.701056	0.972	Unchanged	GDP-mannose 4,6-dehydratase (EC 4.2.1.47)	GO:0008446; GO:0019673; GO:0042350	GDP-L-fucose biosynthetic process [GO:0042350]; GDP-mannose metabolic process [GO:0019673]		GDP-mannose 4,6-dehydratase activity [GO:0008446]	Q9SNY3	AT5G66280
A0A2K3LH45	Trifolium	-2.4	0.00102777	0.352	Down-regulated	LRR repeats and ubiquitin-like domain-containing protein					P0C895	AT2G30105
A0A2K3LH52	Trifolium	-0.215	0.716726	0.972	Unchanged	Amine oxidase (EC 1.4.3.-)	GO:0005507; GO:0009308; GO:0042221; GO:0048038; GO:0052593; GO:0052594; GO:0052596	amine metabolic process [GO:0009308]; response to chemical [GO:0042221]		aminoacetone:oxygen oxidoreductase(deaminating) activity [GO:0052594]; copper ion binding [GO:0005507]; phenethylamine:oxygen oxidoreductase (deaminating) activity [GO:0052596]; quinone binding [GO:0048038]; tryptamine:oxygen oxidoreductase (deaminating) activity [GO:0052593]	P0DO00	#N/A
A0A2K3LH54	Trifolium	-0.645	0.230181	0.944	Unchanged	12-oxophytodienoate reductase-like protein	GO:0010181; GO:0016491			FMN binding [GO:0010181]; oxidoreductase activity [GO:0016491]	Q9FUP0	AT2G06050
A0A2K3LH67	Trifolium	0.0505	0.844425	0.975	Unchanged	glucose-1-phosphate adenylyltransferase (EC 2.7.7.27)	GO:0005524; GO:0005978; GO:0008878; GO:0009507	glycogen biosynthetic process [GO:0005978]	chloroplast [GO:0009507]	ATP binding [GO:0005524]; glucose-1-phosphate adenylyltransferase activity [GO:0008878]	P55230	AT1G27680
A0A2K3LH79	Trifolium	0.311	0.676878	0.971	Unchanged	Thiol protease SEN102-like protein	GO:0006508; GO:0008234	proteolysis [GO:0006508]		cysteine-type peptidase activity [GO:0008234]	Q9FGR9	AT5G50260
A0A2K3LH82	Trifolium	-1.91	0.00018576	0.155	Down-regulated	4-coumarate-CoA ligase 9-like protein	GO:0016874			ligase activity [GO:0016874]	Q84P23	AT5G63380
A0A2K3LH84	Trifolium	-0.256	0.338759	0.956	Unchanged	Uncharacterized protein	GO:0008174; GO:0009651; GO:0009793; GO:0016607	embryo development ending in seed dormancy [GO:0009793]; response to salt stress [GO:0009651]	nuclear speck [GO:0016607]	mRNA methyltransferase activity [GO:0008174]	F4J8G7	AT3G05680
A0A2K3LH86	Trifolium	0.2	0.44025	0.962	Unchanged	Protein tipD-like	GO:0000045	autophagosome assembly [GO:0000045]			Q6NNP0	AT5G50230
A0A2K3LH87	Trifolium	0.326	0.261778	0.948	Unchanged	C-terminal binding protein an-like	GO:0000226; GO:0005802; GO:0005829; GO:0005874; GO:0007097; GO:0008360; GO:0009651; GO:0010091; GO:0010482; GO:0010494; GO:0019900; GO:0031129; GO:0034063; GO:0042803; GO:0042814; GO:0043621; GO:0045604; GO:0048444; GO:0048530; GO:0048826; GO:2000039	cotyledon morphogenesis [GO:0048826]; floral organ morphogenesis [GO:0048444]; fruit morphogenesis [GO:0048530]; inductive cell-cell signaling [GO:0031129]; microtubule cytoskeleton organization [GO:0000226]; monopolar cell growth [GO:0042814]; nuclear migration [GO:0007097]; regulation of cell shape [GO:0008360]; regulation of epidermal cell differentiation [GO:0045604]; regulation of epidermal …	cytoplasmic stress granule [GO:0010494]; cytosol [GO:0005829]; microtubule [GO:0005874]; trans-Golgi network [GO:0005802]	kinase binding [GO:0019900]; protein homodimerization activity [GO:0042803]; protein self-association [GO:0043621]	O23702	AT1G01510
A0A2K3LH91	Trifolium	1.62	0.0192499	0.744	Up-regulated	Fasciclin-like arabinogalactan protein 17-like					Q8RWC5	AT2G35860
A0A2K3LH96	Trifolium	-0.454	0.290784	0.951	Unchanged	glutamate decarboxylase (EC 4.1.1.15)	GO:0004351; GO:0006536; GO:0030170	glutamate metabolic process [GO:0006536]		glutamate decarboxylase activity [GO:0004351]; pyridoxal phosphate binding [GO:0030170]	Q42521	AT5G17330
A0A2K3LHC4	Trifolium	0.624	0.172307	0.933	Unchanged	ATP-dependent (S)-NAD(P)H-hydrate dehydratase	GO:0005524; GO:0016836			ATP binding [GO:0005524]; hydro-lyase activity [GO:0016836]	Q94AF2	AT5G19150
A0A2K3LHE7	Trifolium	0.505	0.297125	0.952	Unchanged	Zinc finger A20 and AN1 domain stress-associated protein	GO:0003677; GO:0008270			DNA binding [GO:0003677]; zinc ion binding [GO:0008270]	Q8H0X0	AT1G51200
A0A2K3LHF2	Trifolium	-0.882	0.119291	0.916	Unchanged	Putative GPI-anchored protein					Q9C5J9	AT5G64813
A0A2K3LHG5	Trifolium	-0.572	0.237058	0.945	Unchanged	ABC transporter C family member 8-like protein	GO:0005524; GO:0016020; GO:0016887; GO:0140359		membrane [GO:0016020]	ABC-type transporter activity [GO:0140359]; ATP binding [GO:0005524]; ATP hydrolysis activity [GO:0016887]	A0A1I9LPV3	#N/A
A0A2K3LHH2	Trifolium	-0.0684	0.775023	0.974	Unchanged	CCT-beta	GO:0005524; GO:0005832; GO:0016887; GO:0051082; GO:0140662		chaperonin-containing T-complex [GO:0005832]	ATP binding [GO:0005524]; ATP hydrolysis activity [GO:0016887]; ATP-dependent protein folding chaperone [GO:0140662]; unfolded protein binding [GO:0051082]	Q940P8	AT5G20890
A0A2K3LHJ1	Trifolium	0.056	0.903805	0.976	Unchanged	Malate dehydrogenase (EC 1.1.1.37)	GO:0006099; GO:0006108; GO:0030060	malate metabolic process [GO:0006108]; tricarboxylic acid cycle [GO:0006099]		L-malate dehydrogenase activity [GO:0030060]	P57106	AT5G43330
A0A2K3LHJ2	Trifolium	0.118	0.690384	0.972	Unchanged	UDP-glycosyltransferase 85A2-like protein	GO:0008194			UDP-glycosyltransferase activity [GO:0008194]	Q9LMF1	AT1G22380
A0A2K3LHL4	Trifolium	-1.27	0.0303855	0.805	Down-regulated	peroxidase (EC 1.11.1.7)	GO:0006979; GO:0020037; GO:0046872; GO:0140825	response to oxidative stress [GO:0006979]		heme binding [GO:0020037]; lactoperoxidase activity [GO:0140825]; metal ion binding [GO:0046872]	Q96509	AT5G14130
A0A2K3LHM8	Trifolium	-1.76	0.0106005	0.67	Down-regulated	choline-phosphate cytidylyltransferase (EC 2.7.7.15)	GO:0004105			choline-phosphate cytidylyltransferase activity [GO:0004105]	A0A1P8AXC2	#N/A
A0A2K3LHN5	Trifolium	-0.0742	0.870935	0.976	Unchanged	peroxidase (EC 1.11.1.7)	GO:0006979; GO:0020037; GO:0046872; GO:0140825	response to oxidative stress [GO:0006979]		heme binding [GO:0020037]; lactoperoxidase activity [GO:0140825]; metal ion binding [GO:0046872]	Q43731	AT4G37520
A0A2K3LHN9	Trifolium	-0.381	0.173497	0.933	Unchanged	Bifunctional purine biosynthesis protein purH	GO:0003937; GO:0004643; GO:0006164	purine nucleotide biosynthetic process [GO:0006164]		IMP cyclohydrolase activity [GO:0003937]; phosphoribosylaminoimidazolecarboxamide formyltransferase activity [GO:0004643]	Q8RWT5	#N/A
A0A2K3LHP2	Trifolium	0.428	0.449066	0.963	Unchanged	Protein exordium-like 5	GO:0048046		apoplast [GO:0048046]		Q9SII5	AT2G17230
A0A2K3LHQ4	Trifolium	-0.0911	0.876432	0.976	Unchanged	50S ribosomal protein l3-2 chloroplastic-like	GO:0003735; GO:0005840; GO:0006412	translation [GO:0006412]	ribosome [GO:0005840]	structural constituent of ribosome [GO:0003735]	Q9LRN8	AT3G17465
A0A2K3LHR5	Trifolium	-0.166	0.73876	0.973	Unchanged	CHD3-type chromatin-remodeling factor pickle-like protein	GO:0003677; GO:0006338	chromatin remodeling [GO:0006338]		DNA binding [GO:0003677]	A0A1P8AZP2	#N/A
A0A2K3LHS0	Trifolium	0.477	0.463253	0.964	Unchanged	Protein SRG1-like					Q9XIA5	#N/A
A0A2K3LHS1	Trifolium	-1.21	0.0151844	0.711	Down-regulated	RING-type E3 ubiquitin transferase (EC 2.3.2.27)	GO:0016020		membrane [GO:0016020]		Q8RXX9	AT3G05200
A0A2K3LHU1	Trifolium	-0.0725	0.864271	0.976	Unchanged	40S ribosomal protein S7	GO:0003735; GO:0005840; GO:0006412; GO:1990904	translation [GO:0006412]	ribonucleoprotein complex [GO:1990904]; ribosome [GO:0005840]	structural constituent of ribosome [GO:0003735]	Q9C514	AT1G48830
A0A2K3LHU7	Trifolium	-1.89	0.00203782	0.46	Down-regulated	ATP-dependent zinc metalloprotease ftsh chloroplastic-like	GO:0004176; GO:0004222; GO:0005524; GO:0006508; GO:0016020	proteolysis [GO:0006508]	membrane [GO:0016020]	ATP binding [GO:0005524]; ATP-dependent peptidase activity [GO:0004176]; metalloendopeptidase activity [GO:0004222]	Q9FIM2	AT5G58870
A0A2K3LHY2	Trifolium	0.244	0.651408	0.971	Unchanged	Trafficking protein particle complex subunit 5-like protein	GO:0005783; GO:0005794; GO:0030008; GO:0048193	Golgi vesicle transport [GO:0048193]	endoplasmic reticulum [GO:0005783]; Golgi apparatus [GO:0005794]; TRAPP complex [GO:0030008]		Q9FGU1	AT5G58030
A0A2K3LHZ3	Trifolium	-0.352	0.0986432	0.906	Unchanged	Glycylpeptide N-tetradecanoyltransferase (EC 2.3.1.97)	GO:0004379			glycylpeptide N-tetradecanoyltransferase activity [GO:0004379]	Q9LTR9	AT5G57020
A0A2K3LI12	Trifolium	-0.915	0.00658999	0.619	Down-regulated	Coiled-coil domain-containing protein 25-like					Q9LYE1	#N/A
A0A2K3LI13	Trifolium	-0.732	0.0958781	0.904	Unchanged	SAUR-like auxin-responsive family protein	GO:0009733	response to auxin [GO:0009733]			Q8GWV6	#N/A
A0A2K3LI14	Trifolium	-2.89	0.000741229	0.306	Down-regulated	Putative isomerase	GO:0009058; GO:0016853	biosynthetic process [GO:0009058]		isomerase activity [GO:0016853]	F4JHW1	AT4G02860
A0A2K3LI16	Trifolium	-0.887	0.39092	0.96	Unchanged	Protein ASPARTIC PROTEASE IN GUARD CELL 2-like	GO:0004190; GO:0006508	proteolysis [GO:0006508]		aspartic-type endopeptidase activity [GO:0004190]	Q8S9J6	AT5G10770
A0A2K3LI48	Trifolium	0.092	0.845523	0.975	Unchanged	Protein RRP5	GO:0003676; GO:0006364	rRNA processing [GO:0006364]		nucleic acid binding [GO:0003676]	F4J8K6	AT3G11964
A0A2K3LI52	Trifolium	0.383	0.495951	0.965	Unchanged	Ferritin (EC 1.16.3.1)	GO:0004322; GO:0006826; GO:0006879; GO:0008199; GO:0009536	intracellular iron ion homeostasis [GO:0006879]; iron ion transport [GO:0006826]	plastid [GO:0009536]	ferric iron binding [GO:0008199]; ferroxidase activity [GO:0004322]	Q39101	AT5G01600
A0A2K3LI54	Trifolium	-0.912	0.133176	0.922	Unchanged	Hyccin	GO:0005737; GO:0016020		cytoplasm [GO:0005737]; membrane [GO:0016020]		Q9FMI8	AT5G64090
A0A2K3LI82	Trifolium	0.441	0.404784	0.96	Unchanged	Glutamate decarboxylase	GO:0004351; GO:0006536; GO:0030170	glutamate metabolic process [GO:0006536]		glutamate decarboxylase activity [GO:0004351]; pyridoxal phosphate binding [GO:0030170]	Q9ZPS4	AT2G02000
A0A2K3LI85	Trifolium	-1.1	0.0647974	0.878	Unchanged	40S ribosomal protein S8	GO:0003735; GO:0005840; GO:0006412; GO:1990904	translation [GO:0006412]	ribonucleoprotein complex [GO:1990904]; ribosome [GO:0005840]	structural constituent of ribosome [GO:0003735]	Q9FIF3	AT5G59240
A0A2K3LID0	Trifolium	-0.509	0.0702897	0.884	Unchanged	Keratin type I cytoskeletal 10-like	GO:0005882		intermediate filament [GO:0005882]		Q9LFX8	AT1G27090
A0A2K3LID7	Trifolium	0.0166	0.976783	0.978	Unchanged	Elongation factor 1-alpha-like protein	GO:0003746; GO:0005525			GTP binding [GO:0005525]; translation elongation factor activity [GO:0003746]	Q8W4H7	AT5G60390
A0A2K3LIE9	Trifolium	-0.105	0.631203	0.97	Unchanged	2-oxoglutarate dehydrogenase mitochondrial-like	GO:0004591; GO:0006099; GO:0030976	tricarboxylic acid cycle [GO:0006099]		oxoglutarate dehydrogenase (succinyl-transferring) activity [GO:0004591]; thiamine pyrophosphate binding [GO:0030976]	F4IWV2	AT3G55410
A0A2K3LIF8	Trifolium	-1.59	0.0226712	0.768	Down-regulated	Riboflavin synthase (EC 2.5.1.9)					Q9SKU8	AT2G20690
A0A2K3LII7	Trifolium	-0.45	0.0903412	0.9	Unchanged	Flocculation protein flo11-like					Q8VZS6	AT3G13222
A0A2K3LIJ3	Trifolium	-0.318	0.487091	0.965	Unchanged	Ethylene-responsive transcription factor rap2-12-like protein	GO:0003677; GO:0003700; GO:0005634; GO:0009873	ethylene-activated signaling pathway [GO:0009873]	nucleus [GO:0005634]	DNA binding [GO:0003677]; DNA-binding transcription factor activity [GO:0003700]	O22259	AT2G47520
A0A2K3LIJ7	Trifolium	1.02	0.19319	0.938	Unchanged	Serine/threonine protein phosphatase 2A 57 kDa regulatory subunit B beta-like protein	GO:0000159; GO:0007165; GO:0019888	signal transduction [GO:0007165]	protein phosphatase type 2A complex [GO:0000159]	protein phosphatase regulator activity [GO:0019888]	O04376	AT3G09880
A0A2K3LIK0	Trifolium	0.957	0.142902	0.925	Unchanged	Acireductone dioxygenase (Acireductone dioxygenase (Fe(2+)-requiring)) (ARD') (Fe-ARD) (EC 1.13.11.54) (Acireductone dioxygenase (Ni(2+)-requiring)) (ARD) (Ni-ARD) (EC 1.13.11.53)	GO:0005506; GO:0005634; GO:0005737; GO:0010308; GO:0010309; GO:0016151; GO:0019509	L-methionine salvage from methylthioadenosine [GO:0019509]	cytoplasm [GO:0005737]; nucleus [GO:0005634]	acireductone dioxygenase (Ni2+-requiring) activity [GO:0010308]; acireductone dioxygenase [iron(II)-requiring] activity [GO:0010309]; iron ion binding [GO:0005506]; nickel cation binding [GO:0016151]	Q8H185	AT5G43850
A0A2K3LIK1	Trifolium	-0.0877	0.830488	0.975	Unchanged	Bifunctional aspartokinase/homoserine dehydrogenase chloroplastic-like	GO:0004072; GO:0004412; GO:0009067; GO:0016310	aspartate family amino acid biosynthetic process [GO:0009067]; phosphorylation [GO:0016310]		aspartate kinase activity [GO:0004072]; homoserine dehydrogenase activity [GO:0004412]	Q84JZ4	#N/A
A0A2K3LIL0	Trifolium	-0.0945	0.753452	0.973	Unchanged	Peptidyl-prolyl cis-trans isomerase g-like protein	GO:0003743; GO:0016853			isomerase activity [GO:0016853]; translation initiation factor activity [GO:0003743]	Q9SAD7	AT1G13020
A0A2K3LIM7	Trifolium	0.398	0.623722	0.97	Unchanged	Alpha-glucosidase-like protein	GO:0004553; GO:0005975	carbohydrate metabolic process [GO:0005975]		hydrolase activity, hydrolyzing O-glycosyl compounds [GO:0004553]	Q9LYF8	AT5G11720
A0A2K3LIM8	Trifolium	-0.246	0.516678	0.966	Unchanged	TOM1-like protein 2-like	GO:0035091; GO:0043130; GO:0043328	protein transport to vacuole involved in ubiquitin-dependent protein catabolic process via the multivesicular body sorting pathway [GO:0043328]		phosphatidylinositol binding [GO:0035091]; ubiquitin binding [GO:0043130]	Q9LPL6	AT1G21380
A0A2K3LIN1	Trifolium	-0.164	0.805322	0.974	Unchanged	cellulase (EC 3.2.1.4)	GO:0008810; GO:0030245	cellulose catabolic process [GO:0030245]		cellulase activity [GO:0008810]	Q42059	AT1G64390
A0A2K3LIN2	Trifolium	-0.748	0.0758508	0.889	Unchanged	Actin-related protein 4-like					Q84M92	AT1G18450
A0A2K3LIN9	Trifolium	-0.233	0.385554	0.959	Unchanged	Arogenate dehydratase (EC 4.2.1.91)	GO:0004664; GO:0009094; GO:0009570; GO:0047769	L-phenylalanine biosynthetic process [GO:0009094]	chloroplast stroma [GO:0009570]	arogenate dehydratase activity [GO:0047769]; prephenate dehydratase activity [GO:0004664]	Q9SGD6	AT1G08250
A0A2K3LIP9	Trifolium	-0.857	0.281966	0.951	Unchanged	F-box protein	GO:0003676; GO:0008270; GO:0015074	DNA integration [GO:0015074]		nucleic acid binding [GO:0003676]; zinc ion binding [GO:0008270]	F4IWC6	AT3G20980
A0A2K3LIQ7	Trifolium	-0.725	0.530153	0.967	Unchanged	Nucleic acid-binding OB-fold-like protein					Q9XIJ0	#N/A
A0A2K3LIQ9	Trifolium	-0.114	0.832173	0.975	Unchanged	1-aminocyclopropane-1-carboxylate oxidase 6-like protein	GO:0044550; GO:0046872; GO:0051213	secondary metabolite biosynthetic process [GO:0044550]		dioxygenase activity [GO:0051213]; metal ion binding [GO:0046872]	Q84MB3	AT1G06620
A0A2K3LIS8	Trifolium	-0.0522	0.850767	0.975	Unchanged	Reticulon-like protein	GO:0005789		endoplasmic reticulum membrane [GO:0005789]		O82352	AT2G46170
A0A2K3LIT3	Trifolium	-0.282	0.693886	0.972	Unchanged	peptidylprolyl isomerase (EC 5.2.1.8)	GO:0003755			peptidyl-prolyl cis-trans isomerase activity [GO:0003755]	Q38931	AT3G25230
A0A2K3LIU3	Trifolium	-0.307	0.532839	0.967	Unchanged	Uncharacterized protein					Q8RY09	#N/A
A0A2K3LIU8	Trifolium	-0.0301	0.973088	0.977	Unchanged	Nuclear autoantigenic sperm protein	GO:0005634		nucleus [GO:0005634]		Q94K88	AT4G37210
A0A2K3LIV5	Trifolium	0.0082	0.974869	0.978	Unchanged	G-type lectin S-receptor-like serine/threonine-protein kinase	GO:0004672; GO:0005524; GO:0016020; GO:0016310; GO:0030246	phosphorylation [GO:0016310]	membrane [GO:0016020]	ATP binding [GO:0005524]; carbohydrate binding [GO:0030246]; protein kinase activity [GO:0004672]	Q8RWZ5	AT4G32300
A0A2K3LIW0	Trifolium	0.488	0.11477	0.914	Unchanged	Multiple inositol polyphosphate phosphatase 1-like protein					Q941B2	AT1G09870
A0A2K3LIW2	Trifolium	0.516	0.220654	0.943	Unchanged	tRNA pseudouridine synthase (EC 5.4.99.12)	GO:0001522; GO:0003723; GO:0008033; GO:0106029	pseudouridine synthesis [GO:0001522]; tRNA processing [GO:0008033]		RNA binding [GO:0003723]; tRNA pseudouridine synthase activity [GO:0106029]	F4I2L0	AT1G09800
A0A2K3LIX9	Trifolium	0.277	0.608617	0.969	Unchanged	MKI67 FHA domain-interacting nucleolar phosphoprotein-like protein	GO:0003723			RNA binding [GO:0003723]	Q9LZ65	AT5G04600
A0A2K3LIZ6	Trifolium	0.617	0.305878	0.953	Unchanged	adenine phosphoribosyltransferase (EC 2.4.2.7)	GO:0016757			glycosyltransferase activity [GO:0016757]	Q9SU38	AT4G12440
A0A2K3LIZ7	Trifolium	0.0589	0.907402	0.976	Unchanged	Charged multivesicular body protein 1-like	GO:0007034	vacuolar transport [GO:0007034]			Q8LE58	AT1G17730
A0A2K3LJ00	Trifolium	-0.225	0.378371	0.959	Unchanged	Calcium-transporting ATPase endoplasmic reticulum-type-like protein	GO:0005524; GO:0016020; GO:0016887		membrane [GO:0016020]	ATP binding [GO:0005524]; ATP hydrolysis activity [GO:0016887]	Q9XES1	AT1G07670
A0A2K3LJ05	Trifolium	-0.549	0.196269	0.938	Unchanged	Ap2/erf and B3 domain-containing transcription factor at1g50680-like protein	GO:0003677; GO:0003700; GO:0005634		nucleus [GO:0005634]	DNA binding [GO:0003677]; DNA-binding transcription factor activity [GO:0003700]	Q9C6M5	AT1G25560
A0A2K3LJ36	Trifolium	-0.132	0.765946	0.974	Unchanged	Serine/arginine-rich splicing factor RSZ22-like protein	GO:0003729; GO:0005681; GO:0006397; GO:0008270; GO:0008380	mRNA processing [GO:0006397]; RNA splicing [GO:0008380]	spliceosomal complex [GO:0005681]	mRNA binding [GO:0003729]; zinc ion binding [GO:0008270]	O81127	AT1G23860
A0A2K3LJ40	Trifolium	0.519	0.0259802	0.786	Unchanged	Dynamin-related protein 3a-like	GO:0003924; GO:0005525			GTP binding [GO:0005525]; GTPase activity [GO:0003924]	Q8S944	AT4G33650
A0A2K3LJ41	Trifolium	-0.105	0.874689	0.976	Unchanged	Geminivirus rep-interacting motor					Q9LX99	AT5G10470
A0A2K3LJ55	Trifolium	0.962	0.344558	0.956	Unchanged	Dirigent protein	GO:0009699; GO:0048046	phenylpropanoid biosynthetic process [GO:0009699]	apoplast [GO:0048046]		Q9C891	AT1G55210
A0A2K3LJ63	Trifolium	1.32	0.0185187	0.738	Up-regulated	Carboxylesterase 1-like protein	GO:0016787			hydrolase activity [GO:0016787]	Q9LVB8	AT5G62180
A0A2K3LJ67	Trifolium	0.408	0.411877	0.961	Unchanged	Molybdate transporter 1-like protein	GO:0015098; GO:0016020		membrane [GO:0016020]	molybdate ion transmembrane transporter activity [GO:0015098]	Q9SL95	AT2G25680
A0A2K3LJ74	Trifolium	0.325	0.555713	0.968	Unchanged	NADH dehydrogenase					Q9FYF8	AT1G67350
A0A2K3LJ84	Trifolium	0.00573	0.982541	0.978	Unchanged	Glycine cleavage system H protein	GO:0005739; GO:0005960; GO:0019464	glycine decarboxylation via glycine cleavage system [GO:0019464]	glycine cleavage complex [GO:0005960]; mitochondrion [GO:0005739]		O82179	AT2G35120
A0A2K3LJ86	Trifolium	-1.23	0.0508487	0.858	Unchanged	Putative splicing factor 3A subunit 1-like protein	GO:0003723; GO:0045292	mRNA cis splicing, via spliceosome [GO:0045292]		RNA binding [GO:0003723]	Q8RXF1	AT1G14650
A0A2K3LJ89	Trifolium	-0.936	0.0515626	0.859	Unchanged	Alcohol dehydrogenase 3-like protein	GO:0008270; GO:0016491			oxidoreductase activity [GO:0016491]; zinc ion binding [GO:0008270]	Q8VZ49	AT1G64710
A0A2K3LJ97	Trifolium	-1.67	0.00722883	0.63	Down-regulated	Plant synaptotagmin	GO:0006869; GO:0008289	lipid transport [GO:0006869]		lipid binding [GO:0008289]	Q93ZM0	AT3G18370
A0A2K3LJ99	Trifolium	-1.27	0.148382	0.927	Unchanged	Tubulin alpha chain	GO:0005200; GO:0005525; GO:0005874; GO:0007017; GO:0016787	microtubule-based process [GO:0007017]	microtubule [GO:0005874]	GTP binding [GO:0005525]; hydrolase activity [GO:0016787]; structural constituent of cytoskeleton [GO:0005200]	Q0WV25	AT1G50010
A0A2K3LJA0	Trifolium	-1.13	0.00440995	0.564	Down-regulated	Serine/threonine protein phosphatase					Q9M305	AT3G48770
A0A2K3LJA3	Trifolium	0.571	0.518915	0.966	Unchanged	Glutathione peroxidase	GO:0004602; GO:0006979	response to oxidative stress [GO:0006979]		glutathione peroxidase activity [GO:0004602]	O48646	AT4G11600
A0A2K3LJB1	Trifolium	-0.506	0.399818	0.96	Unchanged	Serine carboxypeptidase 18-like protein	GO:0004185; GO:0006508	proteolysis [GO:0006508]		serine-type carboxypeptidase activity [GO:0004185]	A0A1P8ASK8	#N/A
A0A2K3LJB6	Trifolium	-0.272	0.280832	0.95	Unchanged	DNA replication licensing factor MCM3 (EC 3.6.4.12)	GO:0000347; GO:0003677; GO:0004386; GO:0005524; GO:0006268; GO:0006270; GO:0016887; GO:0042555	DNA replication initiation [GO:0006270]; DNA unwinding involved in DNA replication [GO:0006268]	MCM complex [GO:0042555]; THO complex [GO:0000347]	ATP binding [GO:0005524]; ATP hydrolysis activity [GO:0016887]; DNA binding [GO:0003677]; helicase activity [GO:0004386]	Q9FL33	AT5G46280
A0A2K3LJC7	Trifolium	-0.0163	0.925075	0.977	Unchanged	Serine-threonine kinase receptor-associated protein	GO:0016301; GO:0016310	phosphorylation [GO:0016310]		kinase activity [GO:0016301]	Q9LW17	AT3G15610
A0A2K3LJD4	Trifolium	-0.557	0.127367	0.919	Unchanged	Beta-ureidopropionase-like protein	GO:0016810; GO:1901564	organonitrogen compound metabolic process [GO:1901564]		hydrolase activity, acting on carbon-nitrogen (but not peptide) bonds [GO:0016810]	Q8H183	AT5G64370
A0A2K3LJE0	Trifolium	0.932	0.354294	0.957	Unchanged	non-specific serine/threonine protein kinase (EC 2.7.11.1)	GO:0004672; GO:0005524; GO:0016020; GO:0016310	phosphorylation [GO:0016310]	membrane [GO:0016020]	ATP binding [GO:0005524]; protein kinase activity [GO:0004672]	C0LGP4	AT3G47570
A0A2K3LJE1	Trifolium	0.149	0.815069	0.975	Unchanged	Eukaryotic translation initiation factor 3 subunit b-like protein	GO:0003723; GO:0003743; GO:0005852; GO:0031369		eukaryotic translation initiation factor 3 complex [GO:0005852]	RNA binding [GO:0003723]; translation initiation factor activity [GO:0003743]; translation initiation factor binding [GO:0031369]	Q9C5Z1	AT5G27640
A0A2K3LJE2	Trifolium	0.261	0.674226	0.971	Unchanged	Isoflavone reductase-like protein	GO:0009807; GO:0016491	lignan biosynthetic process [GO:0009807]		oxidoreductase activity [GO:0016491]	P52577	AT1G75280
A0A2K3LJE4	Trifolium	-0.153	0.683207	0.972	Unchanged	Putative carboxylesterase 2-like protein	GO:0016787			hydrolase activity [GO:0016787]	Q9SX78	AT1G47480
A0A2K3LJF3	Trifolium	-0.362	0.238064	0.945	Unchanged	Polyadenylate-binding protein	GO:0003723			RNA binding [GO:0003723]	Q9LPI5	AT1G32790
A0A2K3LJG6	Trifolium	1.63	0.100326	0.907	Unchanged	Pathogenesis-related thaumatin family protein					P50700	AT4G11650
A0A2K3LJG8	Trifolium	-1.53	0.021543	0.76	Down-regulated	Cugbp elav-like protein family member 2-like protein	GO:0003723			RNA binding [GO:0003723]	Q8LFS6	AT4G03110
A0A2K3LJJ2	Trifolium	1.12	0.0302058	0.804	Up-regulated	Methyltransferase (EC 2.1.1.-)	GO:0008168; GO:0016020; GO:0032259	methylation [GO:0032259]	membrane [GO:0016020]	methyltransferase activity [GO:0008168]	Q93W95	AT4G00740
A0A2K3LJL8	Trifolium	-1.15	0.2618	0.948	Unchanged	Proline dehydrogenase (EC 1.5.5.2)	GO:0004657; GO:0006562	proline catabolic process [GO:0006562]		proline dehydrogenase activity [GO:0004657]	P92983	AT3G30775
A0A2K3LJN1	Trifolium	-0.114	0.870883	0.976	Unchanged	Eukaryotic translation initiation factor 6 (eIF-6)	GO:0003743; GO:0005730; GO:0005737; GO:0042256; GO:0042273; GO:0043023	cytosolic ribosome assembly [GO:0042256]; ribosomal large subunit biogenesis [GO:0042273]	cytoplasm [GO:0005737]; nucleolus [GO:0005730]	ribosomal large subunit binding [GO:0043023]; translation initiation factor activity [GO:0003743]	Q9M060	AT3G55620
A0A2K3LJN7	Trifolium	-0.72	0.116768	0.915	Unchanged	Phosphoglucan water dikinase	GO:0005524; GO:0016301; GO:0016310	phosphorylation [GO:0016310]		ATP binding [GO:0005524]; kinase activity [GO:0016301]	Q6ZY51	AT5G26570
A0A2K3LJP8	Trifolium	0.235	0.558909	0.968	Unchanged	E3 ubiquitin-protein ligase rnf14-like protein	GO:0004842; GO:0008270; GO:0016567	protein ubiquitination [GO:0016567]		ubiquitin-protein transferase activity [GO:0004842]; zinc ion binding [GO:0008270]	Q9LQM5	AT1G32340
A0A2K3LJQ7	Trifolium	-0.353	0.491437	0.965	Unchanged	Late blight resistance protein r1b-19	GO:0046872			metal ion binding [GO:0046872]	O03982	AT1G01490
A0A2K3LJR3	Trifolium	0.489	0.317516	0.954	Unchanged	Molybdenum cofactor sulfurase					F4IMJ8	AT2G23520
A0A2K3LJR7	Trifolium	-0.617	0.124559	0.918	Unchanged	Glutaredoxin-dependent peroxiredoxin (EC 1.11.1.25)	GO:0008379; GO:0034599	cellular response to oxidative stress [GO:0034599]		thioredoxin peroxidase activity [GO:0008379]	Q949U7	AT3G52960
A0A2K3LJR9	Trifolium	-1.56	0.00223287	0.473	Down-regulated	DNA-directed RNA polymerase ii subunit rpb9-like protein	GO:0000428; GO:0003899; GO:0006351	DNA-templated transcription [GO:0006351]	DNA-directed RNA polymerase complex [GO:0000428]	DNA-directed 5'-3' RNA polymerase activity [GO:0003899]	A0A1P8B3U3	#N/A
A0A2K3LJS0	Trifolium	2.35	0.0823343	0.895	Unchanged	L-ascorbate oxidase	GO:0005507			copper ion binding [GO:0005507]	Q8LPS9	AT5G66920
A0A2K3LJV2	Trifolium	-0.0762	0.774021	0.974	Unchanged	WD-40 repeat-containing protein MSI3	GO:0005634		nucleus [GO:0005634]		O22469	AT4G35050
A0A2K3LJW2	Trifolium	0.104	0.774926	0.974	Unchanged	Actin-related protein 7-like					Q8L4Y5	AT3G60830
A0A2K3LJW4	Trifolium	0.0335	0.942608	0.977	Unchanged	2-isopropylmalate synthase	GO:0019752; GO:0044249; GO:0046912; GO:1901566	carboxylic acid metabolic process [GO:0019752]; cellular biosynthetic process [GO:0044249]; organonitrogen compound biosynthetic process [GO:1901566]		acyltransferase activity, acyl groups converted into alkyl on transfer [GO:0046912]	A0A1P8AV04	#N/A
A0A2K3LJW8	Trifolium	1.06	0.0678405	0.881	Unchanged	Lipid transfer-like protein VAS-like	GO:0005886; GO:0098552		plasma membrane [GO:0005886]; side of membrane [GO:0098552]		Q3ECK0	#N/A
A0A2K3LJY3	Trifolium	1.25	0.0429299	0.842	Up-regulated	Biotin/lipoyl attachment domain-containing protein					F4IY77	AT3G56130
A0A2K3LK15	Trifolium	-0.729	0.34551	0.956	Unchanged	Embryo-specific protein	GO:0005737		cytoplasm [GO:0005737]		Q681K2	AT2G41475
A0A2K3LK18	Trifolium	0.0603	0.878227	0.976	Unchanged	procollagen-proline 4-dioxygenase (EC 1.14.11.2)	GO:0004656; GO:0005506; GO:0005789; GO:0031418		endoplasmic reticulum membrane [GO:0005789]	iron ion binding [GO:0005506]; L-ascorbic acid binding [GO:0031418]; procollagen-proline 4-dioxygenase activity [GO:0004656]	Q8LAN3	AT5G18900
A0A2K3LK27	Trifolium	0.295	0.44151	0.962	Unchanged	Large ribosomal subunit protein mL43	GO:0003735; GO:0005739; GO:0005840; GO:0032543; GO:1990904	mitochondrial translation [GO:0032543]	mitochondrion [GO:0005739]; ribonucleoprotein complex [GO:1990904]; ribosome [GO:0005840]	structural constituent of ribosome [GO:0003735]	Q9M1A3	#N/A
A0A2K3LK38	Trifolium	0.199	0.679232	0.971	Unchanged	HXXXD-type acyl-transferase family protein	GO:0016740			transferase activity [GO:0016740]	Q9FMN6	AT5G42830
A0A2K3LK39	Trifolium	0.928	0.0689813	0.882	Unchanged	FRIGIDA-like protein	GO:0009908; GO:0030154	cell differentiation [GO:0030154]; flower development [GO:0009908]			A0A1P8BA40	#N/A
A0A2K3LK48	Trifolium	-0.195	0.680142	0.971	Unchanged	Endoplasmic oxidoreductin-1-like protein	GO:0005789; GO:0015035; GO:0016972; GO:0034975; GO:0071949	protein folding in endoplasmic reticulum [GO:0034975]	endoplasmic reticulum membrane [GO:0005789]	FAD binding [GO:0071949]; protein-disulfide reductase activity [GO:0015035]; thiol oxidase activity [GO:0016972]	Q7X9I4	AT2G38960
A0A2K3LK59	Trifolium	0.229	0.82981	0.975	Unchanged	Putative carboxylesterase 12-like protein	GO:0016787			hydrolase activity [GO:0016787]	Q9SMN0	AT3G48690
A0A2K3LK66	Trifolium	0.868	0.0661381	0.879	Unchanged	sulfate adenylyltransferase (EC 2.7.7.4)	GO:0000103; GO:0004781; GO:0005524; GO:0009507	sulfate assimilation [GO:0000103]	chloroplast [GO:0009507]	ATP binding [GO:0005524]; sulfate adenylyltransferase (ATP) activity [GO:0004781]	Q9LIK9	AT3G22890
A0A2K3LK82	Trifolium	0.24	0.657508	0.971	Unchanged	Indole-3-acetic acid-amido synthetase					O82333	AT2G14960
A0A2K3LK85	Trifolium	-0.0407	0.881457	0.976	Unchanged	Uncharacterized protein					F4KDI6	AT5G58100
A0A2K3LKA7	Trifolium	0.448	0.235346	0.945	Unchanged	Proteasomal ubiquitin receptor ADRM1-like protein	GO:0000502; GO:0005634; GO:0005737		cytoplasm [GO:0005737]; nucleus [GO:0005634]; proteasome complex [GO:0000502]		A0A1P8B2X5	#N/A
A0A2K3LKE8	Trifolium	-0.0536	0.943906	0.977	Unchanged	Centromere/kinetochore protein zw12					O48626	AT2G32900
A0A2K3LKF7	Trifolium	-0.198	0.693657	0.972	Unchanged	Olee1-like protein	GO:0005615		extracellular space [GO:0005615]		Q9LP44	AT1G29140
A0A2K3LKF8	Trifolium	-1.24	0.0497921	0.856	Down-regulated	Canopy-like protein					B3H661	AT1G42480
A0A2K3LKH5	Trifolium	0.781	0.122099	0.917	Unchanged	Small heat shock protein chloroplastic-like					Q96331	AT4G25200
A0A2K3LKI7	Trifolium	-0.584	0.0603396	0.872	Unchanged	phosphatidate cytidylyltransferase (EC 2.7.7.41)	GO:0004605; GO:0016020; GO:0016024	CDP-diacylglycerol biosynthetic process [GO:0016024]	membrane [GO:0016020]	phosphatidate cytidylyltransferase activity [GO:0004605]	O49639	AT4G22340
A0A2K3LKJ4	Trifolium	0.135	0.639005	0.97	Unchanged	Ras-related protein RAB11D-like	GO:0003924; GO:0005525; GO:0016020		membrane [GO:0016020]	GTP binding [GO:0005525]; GTPase activity [GO:0003924]	P28185	AT1G06400
A0A2K3LKK5	Trifolium	-0.865	0.180164	0.935	Unchanged	Sister chromatid cohesion PDS5-like protein	GO:0005634; GO:0007064	mitotic sister chromatid cohesion [GO:0007064]	nucleus [GO:0005634]		Q8GUP3	AT4G31880
A0A2K3LKL8	Trifolium	-0.0181	0.941601	0.977	Unchanged	RNA helicase (EC 3.6.4.13)	GO:0003676; GO:0004386; GO:0005681; GO:0006397; GO:0016887	mRNA processing [GO:0006397]	spliceosomal complex [GO:0005681]	ATP hydrolysis activity [GO:0016887]; helicase activity [GO:0004386]; nucleic acid binding [GO:0003676]	Q38953	AT3G26560
A0A2K3LKM0	Trifolium	-1.74	0.0074695	0.634	Down-regulated	WRKY transcription factor	GO:0003700; GO:0005634; GO:0043565		nucleus [GO:0005634]	DNA-binding transcription factor activity [GO:0003700]; sequence-specific DNA binding [GO:0043565]	O22900	AT2G47260
A0A2K3LKM4	Trifolium	-0.59	0.253701	0.947	Unchanged	ABC transporter B family member	GO:0005524; GO:0016020; GO:0016887; GO:0140359		membrane [GO:0016020]	ABC-type transporter activity [GO:0140359]; ATP binding [GO:0005524]; ATP hydrolysis activity [GO:0016887]	O80725	AT2G47000
A0A2K3LKM8	Trifolium	0.168	0.411541	0.961	Unchanged	Adenylosuccinate synthetase, chloroplastic (AMPSase) (AdSS) (EC 6.3.4.4) (IMP--aspartate ligase)	GO:0000287; GO:0004019; GO:0005525; GO:0009507; GO:0044208	'de novo' AMP biosynthetic process [GO:0044208]	chloroplast [GO:0009507]	adenylosuccinate synthase activity [GO:0004019]; GTP binding [GO:0005525]; magnesium ion binding [GO:0000287]	Q96529	AT3G57610
A0A2K3LKQ1	Trifolium	0.513	0.0901043	0.9	Unchanged	Protein BONZAI 1-like	GO:0005544			calcium-dependent phospholipid binding [GO:0005544]	Q941L3	AT5G61900
A0A2K3LKQ3	Trifolium	0.27	0.595977	0.969	Unchanged	Putative methionine-tRNA ligase-like protein	GO:0016874			ligase activity [GO:0016874]	Q93VB0	AT2G40660
A0A2K3LKR4	Trifolium	0.196	0.760237	0.973	Unchanged	Serine/threonine-protein kinase CTR1-like protein	GO:0002229; GO:0004709; GO:0005634; GO:0005769; GO:0005783; GO:0005802; GO:0005829; GO:0005886; GO:0009414; GO:0009617; GO:0009620; GO:0009723; GO:0009788; GO:0012510; GO:0016310; GO:1900150; GO:1900424; GO:2000031	defense response to oomycetes [GO:0002229]; negative regulation of abscisic acid-activated signaling pathway [GO:0009788]; phosphorylation [GO:0016310]; regulation of defense response to bacterium [GO:1900424]; regulation of defense response to fungus [GO:1900150]; regulation of salicylic acid mediated signaling pathway [GO:2000031]; response to bacterium [GO:0009617]; response to ethylene [GO:00…	cytosol [GO:0005829]; early endosome [GO:0005769]; endoplasmic reticulum [GO:0005783]; nucleus [GO:0005634]; plasma membrane [GO:0005886]; trans-Golgi network [GO:0005802]; trans-Golgi network transport vesicle membrane [GO:0012510]	MAP kinase kinase kinase activity [GO:0004709]	A0A1P8AUW3	#N/A
A0A2K3LKS8	Trifolium	0.569	0.286878	0.951	Unchanged	E3 ubiquitin-protein ligase synoviolin					O22188	AT2G23190
A0A2K3LKU0	Trifolium	0.00149	0.997697	0.978	Unchanged	Cysteine proteinase inhibitor	GO:0004869			cysteine-type endopeptidase inhibitor activity [GO:0004869]	A0A2H1ZEH9	#N/A
A0A2K3LKU4	Trifolium	-1.9	0.0441074	0.845	Down-regulated	Ovule protein					O81297	AT4G02360
A0A2K3LKW9	Trifolium	-0.387	0.169456	0.932	Unchanged	Elongation factor 1-delta-like protein	GO:0003746; GO:0005853		eukaryotic translation elongation factor 1 complex [GO:0005853]	translation elongation factor activity [GO:0003746]	Q84WM9	AT5G12110
A0A2K3LKX3	Trifolium	0.885	0.0697611	0.883	Unchanged	Nascent polypeptide-associated complex subunit beta					Q9SMW7	AT1G17880
A0A2K3LL01	Trifolium	0.108	0.696222	0.972	Unchanged	Galactose oxidase kelch repeat-containing protein					Q8RWL1	#N/A
A0A2K3LL24	Trifolium	-1.26	0.0363298	0.825	Down-regulated	Aldehyde dehydrogenase family 7 member a1	GO:0004029			aldehyde dehydrogenase (NAD+) activity [GO:0004029]	Q9SYG7	AT1G54100
A0A2K3LL29	Trifolium	0.951	0.119135	0.916	Unchanged	Pre-mRNA-splicing factor 18	GO:0005681; GO:0006397; GO:0008380	mRNA processing [GO:0006397]; RNA splicing [GO:0008380]	spliceosomal complex [GO:0005681]		Q9SA55	AT1G03140
A0A2K3LL66	Trifolium	0.241	0.305063	0.953	Unchanged	Histone deacetylase hdt3-like protein					A0A1P8AR70	#N/A
A0A2K3LL73	Trifolium	0.525	0.0949669	0.903	Unchanged	NADH dehydrogenase	GO:0005743; GO:0070469		mitochondrial inner membrane [GO:0005743]; respirasome [GO:0070469]		Q94C12	AT3G18410
A0A2K3LL79	Trifolium	-1.14	0.0133038	0.693	Down-regulated	Flavin-containing monooxygenase FMO GS-OX-like protein 3-like protein	GO:0004499; GO:0050660; GO:0050661			flavin adenine dinucleotide binding [GO:0050660]; N,N-dimethylaniline monooxygenase activity [GO:0004499]; NADP binding [GO:0050661]	Q94BV5	AT1G62600
A0A2K3LL84	Trifolium	-0.998	0.0413657	0.839	Down-regulated	Activating molecule in BECN1-regulated autophagy protein					Q94C94	AT1G04140
A0A2K3LL99	Trifolium	-0.937	0.0167768	0.724	Down-regulated	Cinnamyl alcohol dehydrogenase-like protein	GO:0016616			oxidoreductase activity, acting on the CH-OH group of donors, NAD or NADP as acceptor [GO:0016616]	O49482	AT4G34230
A0A2K3LLA1	Trifolium	0.777	0.275012	0.95	Unchanged	Peroxidase (EC 1.11.1.7)	GO:0005576; GO:0006979; GO:0020037; GO:0042744; GO:0046872; GO:0140825	hydrogen peroxide catabolic process [GO:0042744]; response to oxidative stress [GO:0006979]	extracellular region [GO:0005576]	heme binding [GO:0020037]; lactoperoxidase activity [GO:0140825]; metal ion binding [GO:0046872]	Q9FLC0	AT5G05340
A0A2K3LLA4	Trifolium	-0.195	0.43888	0.962	Unchanged	Trehalose synthase-like protein	GO:0003824; GO:0005992	trehalose biosynthetic process [GO:0005992]		catalytic activity [GO:0003824]	Q9LMI0	AT1G06410
A0A2K3LLB2	Trifolium	0.181	0.589586	0.969	Unchanged	Universal stress A-like protein					Q9M328	AT3G53990
A0A2K3LLC8	Trifolium	-0.91	0.149205	0.927	Unchanged	Peroxidase (EC 1.11.1.7)	GO:0005576; GO:0006979; GO:0020037; GO:0042744; GO:0046872; GO:0140825	hydrogen peroxide catabolic process [GO:0042744]; response to oxidative stress [GO:0006979]	extracellular region [GO:0005576]	heme binding [GO:0020037]; lactoperoxidase activity [GO:0140825]; metal ion binding [GO:0046872]	Q9FLC0	AT5G05340
A0A2K3LLF5	Trifolium	-0.0937	0.702871	0.972	Unchanged	60S ribosomal protein l27a-3-like	GO:0003729; GO:0003735; GO:0006412; GO:0015934	translation [GO:0006412]	large ribosomal subunit [GO:0015934]	mRNA binding [GO:0003729]; structural constituent of ribosome [GO:0003735]	P49637	AT1G70600
A0A2K3LLF8	Trifolium	0.31	0.542749	0.967	Unchanged	Hydroquinone glucosyltransferase-like protein	GO:0016740			transferase activity [GO:0016740]	Q9M156	AT4G01070
A0A2K3LLG4	Trifolium	-0.127	0.521491	0.966	Unchanged	GMP synthase (glutamine-hydrolyzing) (EC 6.3.5.2)	GO:0003921; GO:0005524			ATP binding [GO:0005524]; GMP synthase activity [GO:0003921]	Q9CAD1	AT1G63660
A0A2K3LLH7	Trifolium	0.00612	0.993794	0.978	Unchanged	Starch synthase, chloroplastic/amyloplastic (EC 2.4.1.-)	GO:0004373; GO:0009501; GO:0009507; GO:0019252	starch biosynthetic process [GO:0019252]	amyloplast [GO:0009501]; chloroplast [GO:0009507]	glycogen (starch) synthase activity [GO:0004373]	Q9MAQ0	AT1G32900
A0A2K3LLI8	Trifolium	0.0296	0.939192	0.977	Unchanged	Putative inactive poly (ADP-ribose) polymerase SRO5-like protein	GO:0003950			NAD+ ADP-ribosyltransferase activity [GO:0003950]	Q9ZUD9	AT1G23550
A0A2K3LLJ6	Trifolium	-1.05	0.0172879	0.727	Down-regulated	Cysteine proteinase rd21a-like protein	GO:0006508; GO:0008234	proteolysis [GO:0006508]		cysteine-type peptidase activity [GO:0008234]	Q0WVJ5	AT1G09850
A0A2K3LLK4	Trifolium	-0.23	0.677066	0.971	Unchanged	glucan endo-1,3-beta-D-glucosidase (EC 3.2.1.39) ((1->3)-beta-glucan endohydrolase) (Beta-1,3-endoglucanase)	GO:0002215; GO:0005975; GO:0042973; GO:0050832	carbohydrate metabolic process [GO:0005975]; defense response to fungus [GO:0050832]; defense response to nematode [GO:0002215]		glucan endo-1,3-beta-D-glucosidase activity [GO:0042973]	A0A1P8B3U2	#N/A
A0A2K3LLK6	Trifolium	-0.0828	0.858016	0.975	Unchanged	Rossmann-fold NAD(P)-binding domain protein					Q8VYA4	#N/A
A0A2K3LLN3	Trifolium	-0.105	0.82655	0.975	Unchanged	Dicarboxylate transporter chloroplastic-like	GO:0009706; GO:0015140		chloroplast inner membrane [GO:0009706]	malate transmembrane transporter activity [GO:0015140]	B3H4S6	#N/A
A0A2K3LLP6	Trifolium	-1.82	0.000588296	0.272	Down-regulated	Gamma-tubulin complex component	GO:0000922; GO:0005737; GO:0005815; GO:0005874; GO:0007020; GO:0043015	microtubule nucleation [GO:0007020]	cytoplasm [GO:0005737]; microtubule [GO:0005874]; microtubule organizing center [GO:0005815]; spindle pole [GO:0000922]	gamma-tubulin binding [GO:0043015]	Q9C5H9	AT5G17410
A0A2K3LLU9	Trifolium	0.0702	0.902342	0.976	Unchanged	Amidohydrolase ytcj-like protein	GO:0016810			hydrolase activity, acting on carbon-nitrogen (but not peptide) bonds [GO:0016810]	F4IY41	#N/A
A0A2K3LLX5	Trifolium	-0.384	0.481151	0.964	Unchanged	Nuclear pore complex protein Nup85-like	GO:0005643; GO:0015031; GO:0051028	mRNA transport [GO:0051028]; protein transport [GO:0015031]	nuclear pore [GO:0005643]		Q8RXH2	AT4G32910
A0A2K3LLZ2	Trifolium	0.141	0.77165	0.974	Unchanged	Uncharacterized protein					Q8L948	#N/A
A0A2K3LLZ3	Trifolium	-1.4	0.0318258	0.811	Down-regulated	Benzyl alcohol O-benzoyltransferase-like protein	GO:0016740			transferase activity [GO:0016740]	Q9LF70	AT5G17540
A0A2K3LM08	Trifolium	-0.879	0.19789	0.939	Unchanged	phenylalanine ammonia-lyase (EC 4.3.1.24)	GO:0006559; GO:0009800; GO:0045548	cinnamic acid biosynthetic process [GO:0009800]; L-phenylalanine catabolic process [GO:0006559]		phenylalanine ammonia-lyase activity [GO:0045548]	P35510	AT2G37040
A0A2K3LM11	Trifolium	-0.739	0.195536	0.938	Unchanged	Uncharacterized protein					Q8S8A5	#N/A
A0A2K3LM13	Trifolium	-0.51	0.253656	0.947	Unchanged	diphosphoinositol-pentakisphosphate 1-kinase (EC 2.7.4.24)	GO:0000827; GO:0000829; GO:0000832; GO:0005524; GO:0005737; GO:0016310; GO:0033857; GO:0052723; GO:0052724	phosphorylation [GO:0016310]	cytoplasm [GO:0005737]	ATP binding [GO:0005524]; diphosphoinositol-pentakisphosphate kinase activity [GO:0033857]; inositol heptakisphosphate kinase activity [GO:0000829]; inositol hexakisphosphate 1-kinase activity [GO:0052723]; inositol hexakisphosphate 3-kinase activity [GO:0052724]; inositol hexakisphosphate 5-kinase activity [GO:0000832]; inositol-1,3,4,5,6-pentakisphosphate kinase activity [GO:0000827]	A0A1P8BBN0	#N/A
A0A2K3LM29	Trifolium	-0.672	0.299381	0.952	Unchanged	Late embryogenesis abundant protein	GO:0016020; GO:0098542	defense response to other organism [GO:0098542]	membrane [GO:0016020]		Q9SJ52	AT2G35980
A0A2K3LM41	Trifolium	0.631	0.274824	0.95	Unchanged	folate gamma-glutamyl hydrolase (EC 3.4.19.9)	GO:0005576; GO:0034722		extracellular region [GO:0005576]	gamma-glutamyl-peptidase activity [GO:0034722]	F4IBT7	#N/A
A0A2K3LM69	Trifolium	-0.181	0.519528	0.966	Unchanged	Disease resistance protein	GO:0006952	defense response [GO:0006952]			Q9SU72	AT3G48090
A0A2K3LM81	Trifolium	0.919	0.128297	0.92	Unchanged	Pollen-specific protein C13-like					Q9SZY5	AT4G08685
A0A2K3LM85	Trifolium	0.0548	0.74698	0.973	Unchanged	Protein root hair defective 3	GO:0000166; GO:0005783		endoplasmic reticulum [GO:0005783]	nucleotide binding [GO:0000166]	Q9FKE9	AT5G45160
A0A2K3LMA3	Trifolium	0.407	0.31102	0.953	Unchanged	26S proteasome non-ATPase regulatory subunit rpn12a-like protein	GO:0005838; GO:0006508	proteolysis [GO:0006508]	proteasome regulatory particle [GO:0005838]		Q9FHY0	AT5G42040
A0A2K3LMB0	Trifolium	-0.587	0.0367522	0.827	Down-regulated	Large ribosomal subunit protein eL28	GO:0003735; GO:0005840; GO:0006412; GO:1990904	translation [GO:0006412]	ribonucleoprotein complex [GO:1990904]; ribosome [GO:0005840]	structural constituent of ribosome [GO:0003735]	Q9M0E2	AT4G29410
A0A2K3LMC4	Trifolium	0.844	0.173385	0.933	Unchanged	Serine/threonine protein kinase-like protein ACR4-like	GO:0004674; GO:0005524; GO:0016020; GO:0016310; GO:0050896	phosphorylation [GO:0016310]; response to stimulus [GO:0050896]	membrane [GO:0016020]	ATP binding [GO:0005524]; protein serine/threonine kinase activity [GO:0004674]	Q9FNL4	AT5G46080
A0A2K3LMF4	Trifolium	-0.104	0.859943	0.976	Unchanged	DNA replication licensing factor MCM3 1-like protein	GO:0003677; GO:0005524; GO:0032508	DNA duplex unwinding [GO:0032508]		ATP binding [GO:0005524]; DNA binding [GO:0003677]	A0A1P8BGQ6	#N/A
A0A2K3LMF7	Trifolium	-0.199	0.767131	0.974	Unchanged	3-hydroxyisobutyryl-CoA hydrolase (HIB-CoA hydrolase) (HIBYL-CoA-H) (EC 3.1.2.4) (3-hydroxyisobutyryl-coenzyme A hydrolase)	GO:0003860; GO:0006574	valine catabolic process [GO:0006574]		3-hydroxyisobutyryl-CoA hydrolase activity [GO:0003860]	Q9LKJ1	AT5G65940
A0A2K3LMI4	Trifolium	-0.0302	0.891791	0.976	Unchanged	Dihydrolipoyl dehydrogenase mitochondrial-like	GO:0004148; GO:0050660			dihydrolipoyl dehydrogenase activity [GO:0004148]; flavin adenine dinucleotide binding [GO:0050660]	Q9M5K3	AT1G48030
A0A2K3LMI9	Trifolium	-0.756	0.0818382	0.894	Unchanged	Sodium/calcium exchanger family protein	GO:0005509; GO:0008324; GO:0016020		membrane [GO:0016020]	calcium ion binding [GO:0005509]; monoatomic cation transmembrane transporter activity [GO:0008324]	Q8L636	AT1G53210
A0A2K3LMJ4	Trifolium	-0.294	0.631865	0.97	Unchanged	Er membrane protein complex subunit 7	GO:0016020		membrane [GO:0016020]		Q84JM6	AT2G25310
A0A2K3LMJ5	Trifolium	0.38	0.624764	0.97	Unchanged	hydroxymethylbilane synthase (EC 2.5.1.61) (Hydroxymethylbilane synthase)	GO:0004418; GO:0006779; GO:0009507; GO:1900865	chloroplast RNA modification [GO:1900865]; porphyrin-containing compound biosynthetic process [GO:0006779]	chloroplast [GO:0009507]	hydroxymethylbilane synthase activity [GO:0004418]	Q43316	AT5G08280
A0A2K3LMK0	Trifolium	0.065	0.909778	0.976	Unchanged	Aldehyde dehydrogenase family 2 member c4-like protein	GO:0016620			oxidoreductase activity, acting on the aldehyde or oxo group of donors, NAD or NADP as acceptor [GO:0016620]	Q56YU0	AT3G24503
A0A2K3LMK3	Trifolium	-0.18	0.434976	0.962	Unchanged	40S ribosomal protein s11-like	GO:0003735; GO:0005840; GO:0006412; GO:1990904	translation [GO:0006412]	ribonucleoprotein complex [GO:1990904]; ribosome [GO:0005840]	structural constituent of ribosome [GO:0003735]	P16181	AT3G48930
A0A2K3LML8	Trifolium	-2.73	0.0423057	0.841	Down-regulated	NADP-dependent alkenal double bond reductase p1-like protein	GO:0016628			oxidoreductase activity, acting on the CH-CH group of donors, NAD or NADP as acceptor [GO:0016628]	Q39173	AT5G16990
A0A2K3LMM9	Trifolium	-0.0483	0.8383	0.975	Unchanged	WD repeat domain phosphoinositide-interacting protein 3-like	GO:0034045		phagophore assembly site membrane [GO:0034045]		F4IZI7	#N/A
A0A2K3LMN3	Trifolium	-1.24	0.00260593	0.494	Down-regulated	Protein ASPARTIC PROTEASE IN GUARD CELL 1-like	GO:0004190; GO:0006508	proteolysis [GO:0006508]		aspartic-type endopeptidase activity [GO:0004190]	Q9LS40	AT3G18490
A0A2K3LMN7	Trifolium	0.38	0.761483	0.973	Unchanged	Serine-glyoxylate aminotransferase-like protein	GO:0008483			transaminase activity [GO:0008483]	Q56YA5	AT2G13360
A0A2K3LMP8	Trifolium	-0.265	0.702626	0.972	Unchanged	O-fucosyltransferase family protein	GO:0006004; GO:0016740	fucose metabolic process [GO:0006004]		transferase activity [GO:0016740]	Q94BY4	AT5G35570
A0A2K3LMP9	Trifolium	0.0933	0.930822	0.977	Unchanged	Miraculin	GO:0004866; GO:0005576		extracellular region [GO:0005576]	endopeptidase inhibitor activity [GO:0004866]	Q9LMU2	AT1G17860
A0A2K3LMQ6	Trifolium	0.219	0.517031	0.966	Unchanged	NADP-dependent alkenal double bond reductase p1-like protein	GO:0016628			oxidoreductase activity, acting on the CH-CH group of donors, NAD or NADP as acceptor [GO:0016628]	Q39172	AT5G16970
A0A2K3LMS9	Trifolium	-0.122	0.494603	0.965	Unchanged	Eukaryotic translation initiation factor 3 subunit a	GO:0003723; GO:0003743; GO:0005852		eukaryotic translation initiation factor 3 complex [GO:0005852]	RNA binding [GO:0003723]; translation initiation factor activity [GO:0003743]	Q9LD55	AT4G11420
A0A2K3LMV8	Trifolium	-0.506	0.241312	0.946	Unchanged	12-oxophytodienoate reductase	GO:0010181; GO:0016491			FMN binding [GO:0010181]; oxidoreductase activity [GO:0016491]	Q8GYB8	AT1G76690
A0A2K3LMV9	Trifolium	0.715	0.0563984	0.867	Unchanged	Methylmalonate-semialdehyde dehydrogenase	GO:0004491			methylmalonate-semialdehyde dehydrogenase (acylating, NAD) activity [GO:0004491]	A8MQR6	#N/A
A0A2K3LMY2	Trifolium	0.944	0.0130087	0.69	Up-regulated	Exocyst complex component 3-like protein	GO:0000145; GO:0005829; GO:0006887; GO:0060321	acceptance of pollen [GO:0060321]; exocytosis [GO:0006887]	cytosol [GO:0005829]; exocyst [GO:0000145]		Q94AI6	AT1G71820
A0A2K3LMY9	Trifolium	0.0616	0.858194	0.975	Unchanged	3-deoxy-8-phosphooctulonate synthase (EC 2.5.1.55)	GO:0005737; GO:0008676; GO:0009058	biosynthetic process [GO:0009058]	cytoplasm [GO:0005737]	3-deoxy-8-phosphooctulonate synthase activity [GO:0008676]	Q6NQL4	AT1G16340
A0A2K3LMZ8	Trifolium	1.63	0.0565557	0.867	Unchanged	Epoxide hydrolase	GO:0016787			hydrolase activity [GO:0016787]	O81299	AT4G02340
A0A2K3LN04	Trifolium	0.837	0.0181742	0.735	Up-regulated	AB hydrolase-1 domain-containing protein					Q9SJM9	#N/A
A0A2K3LN13	Trifolium	-0.565	0.231165	0.944	Unchanged	DNA ligase 1-like protein	GO:0003910; GO:0005524; GO:0006281; GO:0006310	DNA recombination [GO:0006310]; DNA repair [GO:0006281]		ATP binding [GO:0005524]; DNA ligase (ATP) activity [GO:0003910]	Q42572	AT1G08130
A0A2K3LN15	Trifolium	0.11	0.665385	0.971	Unchanged	Calcium-binding mitochondrial carrier protein SCaMC-2-like	GO:0005509; GO:0005743; GO:0055085	transmembrane transport [GO:0055085]	mitochondrial inner membrane [GO:0005743]	calcium ion binding [GO:0005509]	Q9FI43	AT5G51050
A0A2K3LN19	Trifolium	-0.484	0.481289	0.964	Unchanged	Double-stranded RNA-binding protein 1-like	GO:0003725			double-stranded RNA binding [GO:0003725]	A0A1P8AQD8	#N/A
A0A2K3LN24	Trifolium	-2.17	0.0001732	0.149	Down-regulated	DEAD-box ATP-dependent RNA helicase 16-like protein	GO:0003724; GO:0003729; GO:0005524; GO:0016787			ATP binding [GO:0005524]; hydrolase activity [GO:0016787]; mRNA binding [GO:0003729]; RNA helicase activity [GO:0003724]	Q9SW44	AT4G34910
A0A2K3LN28	Trifolium	0.104	0.61716	0.97	Unchanged	Exosome complex exonuclease rrp44-like protein	GO:0003723; GO:0004527; GO:0004540; GO:0005634		nucleus [GO:0005634]	exonuclease activity [GO:0004527]; RNA binding [GO:0003723]; RNA nuclease activity [GO:0004540]	Q9SHL7	AT2G17510
A0A2K3LN31	Trifolium	0.18	0.488033	0.965	Unchanged	Copper-transporting ATPase 3-like protein	GO:0016020; GO:0046872		membrane [GO:0016020]	metal ion binding [GO:0046872]	Q9SH30	AT1G63440
A0A2K3LN57	Trifolium	0.451	0.54845	0.967	Unchanged	Trafficking protein particle complex subunit 5-like protein	GO:0005783; GO:0005794; GO:0030008; GO:0048193	Golgi vesicle transport [GO:0048193]	endoplasmic reticulum [GO:0005783]; Golgi apparatus [GO:0005794]; TRAPP complex [GO:0030008]		Q9FGU1	AT5G58030
A0A2K3LN66	Trifolium	-0.689	0.0645158	0.877	Unchanged	26S proteasome non-ATPase regulatory subunit 4-like protein	GO:0000502		proteasome complex [GO:0000502]		P55034	AT4G38630
A0A2K3LN68	Trifolium	-0.304	0.541744	0.967	Unchanged	Glycine-rich RNA-binding protein mitochondrial-like	GO:0003723			RNA binding [GO:0003723]	A8MSB9	#N/A
A0A2K3LN70	Trifolium	0.854	0.147337	0.926	Unchanged	DUF3475 domain-containing protein	GO:0045927	positive regulation of growth [GO:0045927]			Q9XID5	AT1G34320
A0A2K3LN78	Trifolium	1.49	0.116943	0.915	Unchanged	Calcium-transporting ATPase endoplasmic reticulum-type-like protein	GO:0016020		membrane [GO:0016020]		P92939	AT1G07810
A0A2K3LN94	Trifolium	0.209	0.680246	0.971	Unchanged	Long chain base biosynthesis protein 2a-like	GO:0009058; GO:0030170	biosynthetic process [GO:0009058]		pyridoxal phosphate binding [GO:0030170]	Q9LSZ9	AT5G23670
A0A2K3LN96	Trifolium	0.411	0.312302	0.954	Unchanged	Methylthioribose kinase	GO:0016301; GO:0016310	phosphorylation [GO:0016310]		kinase activity [GO:0016301]	Q9C6D2	AT1G49820
A0A2K3LN98	Trifolium	-0.399	0.245895	0.946	Unchanged	Neutral alpha-glucosidase AB					Q9FN05	AT5G63840
A0A2K3LNB8	Trifolium	-0.00209	0.997854	0.978	Unchanged	NADP-dependent alkenal double bond reductase p1-like protein	GO:0016628			oxidoreductase activity, acting on the CH-CH group of donors, NAD or NADP as acceptor [GO:0016628]	A0A1P8BEE4	AT5G17000
A0A2K3LNE2	Trifolium	-0.588	0.0149103	0.709	Down-regulated	Protein auxin response 4-like	GO:0016020		membrane [GO:0016020]		Q9FZ33	AT1G54990
A0A2K3LNF7	Trifolium	0.833	0.0548462	0.864	Unchanged	Leguminosin group486 secreted peptide					#N/A	#N/A
A0A2K3LNG8	Trifolium	-0.831	0.0298226	0.803	Down-regulated	Peptide transporter PTR2-like protein	GO:0006857; GO:0016020; GO:0022857	oligopeptide transport [GO:0006857]	membrane [GO:0016020]	transmembrane transporter activity [GO:0022857]	P46032	AT2G02040
A0A2K3LNG9	Trifolium	0.105	0.856922	0.975	Unchanged	Isoflavone 2'-hydroxylase-like protein	GO:0004497; GO:0005506; GO:0016020; GO:0016705; GO:0020037		membrane [GO:0016020]	heme binding [GO:0020037]; iron ion binding [GO:0005506]; monooxygenase activity [GO:0004497]; oxidoreductase activity, acting on paired donors, with incorporation or reduction of molecular oxygen [GO:0016705]	Q9SZT7	AT4G37370
A0A2K3LNN4	Trifolium	-0.332	0.553143	0.967	Unchanged	Secologanin synthase-like protein	GO:0004497; GO:0005506; GO:0016020; GO:0016705; GO:0020037		membrane [GO:0016020]	heme binding [GO:0020037]; iron ion binding [GO:0005506]; monooxygenase activity [GO:0004497]; oxidoreductase activity, acting on paired donors, with incorporation or reduction of molecular oxygen [GO:0016705]	A0A1I9LP41	#N/A
A0A2K3LNN8	Trifolium	-0.197	0.680824	0.971	Unchanged	Membrin-11-like protein	GO:0005737; GO:0015031; GO:0016020	protein transport [GO:0015031]	cytoplasm [GO:0005737]; membrane [GO:0016020]		Q9SJL6	AT2G36900
A0A2K3LNP6	Trifolium	1.77	0.00208816	0.463	Up-regulated	Isoliquiritigenin 2'-O-methyltransferase-like protein	GO:0008757; GO:0032259; GO:0046983	methylation [GO:0032259]		protein dimerization activity [GO:0046983]; S-adenosylmethionine-dependent methyltransferase activity [GO:0008757]	Q9FK25	AT5G54160
A0A2K3LNQ5	Trifolium	0.411	0.536879	0.967	Unchanged	Kanadaptin-like protein					Q0WW94	AT5G38840
A0A2K3LNU1	Trifolium	0.405	0.485442	0.965	Unchanged	Arginyl-tRNA synthetase	GO:0004814; GO:0005524; GO:0005737; GO:0006420; GO:0009791; GO:0048608	arginyl-tRNA aminoacylation [GO:0006420]; post-embryonic development [GO:0009791]; reproductive structure development [GO:0048608]	cytoplasm [GO:0005737]	arginine-tRNA ligase activity [GO:0004814]; ATP binding [GO:0005524]	A0A1P8B7W2	#N/A
A0A2K3LNV4	Trifolium	-0.704	0.0511574	0.858	Unchanged	Apoptosis inhibitor 5-like protein					F4IGU7	#N/A
A0A2K3LNX2	Trifolium	-0.18	0.357649	0.957	Unchanged	Hydroxyproline-rich glycoprotein family protein	GO:0003723			RNA binding [GO:0003723]	F4JEN1	#N/A
A0A2K3LNY6	Trifolium	-0.514	0.169322	0.932	Unchanged	CYTH domain-containing protein	GO:0016462			pyrophosphatase activity [GO:0016462]	Q9SIY3	AT2G11890
A0A2K3LNZ3	Trifolium	0.0536	0.857262	0.975	Unchanged	Endoplasmic reticulum resident protein 29 C-terminal domain-containing protein	GO:0005783; GO:0009553; GO:0009567; GO:0009793; GO:0034976; GO:0048868	double fertilization forming a zygote and endosperm [GO:0009567]; embryo development ending in seed dormancy [GO:0009793]; embryo sac development [GO:0009553]; pollen tube development [GO:0048868]; response to endoplasmic reticulum stress [GO:0034976]	endoplasmic reticulum [GO:0005783]		O22263	AT2G47470
A0A2K3LP07	Trifolium	0.646	0.0808097	0.893	Unchanged	MHD2 domain-containing protein					Q0WQB7	AT2G25800
A0A2K3LP16	Trifolium	-1.2	0.0725532	0.886	Unchanged	Ent-kaur-16-ene synthase chloroplastic-like	GO:0010333			terpene synthase activity [GO:0010333]	Q9SAK2	AT1G79460
A0A2K3LP24	Trifolium	-1.98	0.0208288	0.756	Down-regulated	RING-type E3 ubiquitin transferase (EC 2.3.2.27)	GO:0004672; GO:0005524			ATP binding [GO:0005524]; protein kinase activity [GO:0004672]	A0A1P8BC68	AT5G12000
A0A2K3LP42	Trifolium	0.0312	0.95339	0.977	Unchanged	RNA-dependent RNA polymerase (EC 2.7.7.48)	GO:0003723; GO:0003968; GO:0031047	regulatory ncRNA-mediated gene silencing [GO:0031047]		RNA binding [GO:0003723]; RNA-dependent RNA polymerase activity [GO:0003968]	Q9LQV2	AT1G14790
A0A2K3LP49	Trifolium	-0.748	0.146973	0.926	Unchanged	Cullin-1-like protein	GO:0006511; GO:0008757; GO:0031625	ubiquitin-dependent protein catabolic process [GO:0006511]		S-adenosylmethionine-dependent methyltransferase activity [GO:0008757]; ubiquitin protein ligase binding [GO:0031625]	Q94AH6	AT4G02570
A0A2K3LP58	Trifolium	-1.33	0.0264955	0.788	Down-regulated	Putative anion transporter 5-like protein	GO:0005315; GO:0016020		membrane [GO:0016020]	inorganic phosphate transmembrane transporter activity [GO:0005315]	Q9FKV1	AT5G44370
A0A2K3LPB4	Trifolium	0.176	0.485149	0.965	Unchanged	Phosphoribosylformylglycinamidine synthase	GO:0006541	glutamine metabolic process [GO:0006541]			Q9M8D3	AT1G74260
A0A2K3LPE0	Trifolium	0.525	0.042342	0.841	Unchanged	Putative N-acetyl-gamma-glutamyl-phosphate chloroplastic-like	GO:0008652; GO:0016620; GO:0046983	amino acid biosynthetic process [GO:0008652]		oxidoreductase activity, acting on the aldehyde or oxo group of donors, NAD or NADP as acceptor [GO:0016620]; protein dimerization activity [GO:0046983]	Q93Z70	AT2G19940
A0A2K3LPF0	Trifolium	-0.113	0.55404	0.967	Unchanged	Lactoylglutathione lyase-like protein	GO:0004462; GO:0046872			lactoylglutathione lyase activity [GO:0004462]; metal ion binding [GO:0046872]	O65398	AT1G11840
A0A2K3LPF4	Trifolium	-0.0854	0.839849	0.975	Unchanged	Elongation factor 1-gamma-like protein	GO:0003746; GO:0004364; GO:0042221	response to chemical [GO:0042221]		glutathione transferase activity [GO:0004364]; translation elongation factor activity [GO:0003746]	O04487	AT1G09640
A0A2K3LPF6	Trifolium	0.423	0.239139	0.945	Unchanged	chorismate mutase (EC 5.4.99.5)	GO:0004106; GO:0008652; GO:0009073; GO:0046417	amino acid biosynthetic process [GO:0008652]; aromatic amino acid family biosynthetic process [GO:0009073]; chorismate metabolic process [GO:0046417]		chorismate mutase activity [GO:0004106]	P42738	AT3G29200
A0A2K3LPF8	Trifolium	-0.858	0.00209707	0.464	Down-regulated	Peptidyl-prolyl cis-trans isomerase (PPIase) (EC 5.2.1.8)	GO:0003755			peptidyl-prolyl cis-trans isomerase activity [GO:0003755]	Q9C835	AT3G66654
A0A2K3LPG6	Trifolium	-0.607	0.250839	0.947	Unchanged	beta-N-acetylhexosaminidase (EC 3.2.1.52)	GO:0004563; GO:0005975; GO:0102148	carbohydrate metabolic process [GO:0005975]		beta-N-acetylhexosaminidase activity [GO:0004563]; N-acetyl-beta-D-galactosaminidase activity [GO:0102148]	A7WM73	AT3G55260
A0A2K3LPI4	Trifolium	-1.18	0.15348	0.928	Unchanged	Peptide chain release factor 2-like protein	GO:0003747; GO:0005737		cytoplasm [GO:0005737]	translation release factor activity [GO:0003747]	F4I532	AT1G56350
A0A2K3LPK6	Trifolium	-1.59	0.00927416	0.657	Down-regulated	Cytochrome p450	GO:0004497; GO:0005506; GO:0016020; GO:0016705; GO:0020037		membrane [GO:0016020]	heme binding [GO:0020037]; iron ion binding [GO:0005506]; monooxygenase activity [GO:0004497]; oxidoreductase activity, acting on paired donors, with incorporation or reduction of molecular oxygen [GO:0016705]	Q9LXM3	AT3G44250
A0A2K3LPL2	Trifolium	-0.73	0.0650939	0.878	Unchanged	Proliferating cell nuclear antigen large form protein	GO:0003677; GO:0006275; GO:0030337	regulation of DNA replication [GO:0006275]		DNA binding [GO:0003677]; DNA polymerase processivity factor activity [GO:0030337]	Q9ZW35	AT2G29570
A0A2K3LPP1	Trifolium	-0.229	0.36056	0.957	Unchanged	Dirigent protein	GO:0009699; GO:0048046	phenylpropanoid biosynthetic process [GO:0009699]	apoplast [GO:0048046]		Q9C523	AT1G58170
A0A2K3LPQ1	Trifolium	-1.95	0.00385423	0.543	Down-regulated	Coatomer subunit delta	GO:0000139; GO:0006890; GO:0015031; GO:0030126	protein transport [GO:0015031]; retrograde vesicle-mediated transport, Golgi to endoplasmic reticulum [GO:0006890]	COPI vesicle coat [GO:0030126]; Golgi membrane [GO:0000139]		Q93Y22	AT5G05010
A0A2K3LPQ2	Trifolium	0.702	0.276207	0.95	Unchanged	Pre-mRNA-splicing factor syf1-like protein	GO:0000398; GO:0005634	mRNA splicing, via spliceosome [GO:0000398]	nucleus [GO:0005634]		Q9LKU3	AT5G28740
A0A2K3LPQ4	Trifolium	-0.173	0.575688	0.968	Unchanged	Copper ion binding protein	GO:0005762		mitochondrial large ribosomal subunit [GO:0005762]		Q9M0V5	AT4G05400
A0A2K3LPS2	Trifolium	0.584	0.110259	0.912	Unchanged	NADH-ubiquinone reductase complex 1 MLRQ subunit	GO:0016020		membrane [GO:0016020]		Q9LJ47	#N/A
A0A2K3LPV6	Trifolium	0.861	0.116865	0.915	Unchanged	Methylecgonone reductase-like protein	GO:0016491			oxidoreductase activity [GO:0016491]	Q9SXC0	AT1G59960
A0A2K3LPY1	Trifolium	-0.389	0.489883	0.965	Unchanged	Nucleobase-ascorbate transporter 6-like protein	GO:0016020; GO:0022857; GO:0071702	organic substance transport [GO:0071702]	membrane [GO:0016020]	transmembrane transporter activity [GO:0022857]	Q27GI3	AT5G62890
A0A2K3LPZ9	Trifolium	0.773	0.0772112	0.89	Unchanged	Isoflavonoid malonyl transferase	GO:0016740			transferase activity [GO:0016740]	Q940Z5	AT5G39050
A0A2K3LQ00	Trifolium	-0.446	0.0870112	0.898	Unchanged	60S ribosomal protein l35-like	GO:0000463; GO:0003735; GO:0006412; GO:0022625	maturation of LSU-rRNA from tricistronic rRNA transcript (SSU-rRNA, 5.8S rRNA, LSU-rRNA) [GO:0000463]; translation [GO:0006412]	cytosolic large ribosomal subunit [GO:0022625]	structural constituent of ribosome [GO:0003735]	O80626	AT2G39390
A0A2K3LQ57	Trifolium	0.397	0.129115	0.92	Unchanged	Elongator complex protein 2	GO:0002098; GO:0005634; GO:0005737; GO:0033588	tRNA wobble uridine modification [GO:0002098]	cytoplasm [GO:0005737]; elongator holoenzyme complex [GO:0033588]; nucleus [GO:0005634]		F4I1S7	AT1G49540
A0A2K3LQ61	Trifolium	0.432	0.229137	0.944	Unchanged	Seryl-tRNA ligase	GO:0004828; GO:0005524; GO:0006434	seryl-tRNA aminoacylation [GO:0006434]		ATP binding [GO:0005524]; serine-tRNA ligase activity [GO:0004828]	Q39230	AT5G27470
A0A2K3LQ71	Trifolium	-0.133	0.657127	0.971	Unchanged	Peptide-methionine (R)-S-oxide reductase (EC 1.8.4.12)	GO:0006979; GO:0030091; GO:0033743; GO:0046872	protein repair [GO:0030091]; response to oxidative stress [GO:0006979]		metal ion binding [GO:0046872]; peptide-methionine (R)-S-oxide reductase activity [GO:0033743]	Q9C5C8	AT4G21860
A0A2K3LQ79	Trifolium	-0.255	0.72037	0.972	Unchanged	Uncharacterized protein					Q9LHC4	AT3G32930
A0A2K3LQ87	Trifolium	0.106	0.5994	0.969	Unchanged	60S ribosomal protein l32-1-like	GO:0003735; GO:0005840; GO:0006412; GO:1990904	translation [GO:0006412]	ribonucleoprotein complex [GO:1990904]; ribosome [GO:0005840]	structural constituent of ribosome [GO:0003735]	P49211	AT4G18100
A0A2K3LQ89	Trifolium	0.985	0.0426202	0.842	Up-regulated	V-type proton ATPase subunit C	GO:0033180; GO:0046961		proton-transporting V-type ATPase, V1 domain [GO:0033180]	proton-transporting ATPase activity, rotational mechanism [GO:0046961]	Q9SDS7	AT1G12840
A0A2K3LQB2	Trifolium	-0.276	0.444492	0.963	Unchanged	U4/U6 small nuclear ribonucleoprotein Prp4-like	GO:1990904		ribonucleoprotein complex [GO:1990904]		O22212	AT2G41500
A0A2K3LQB5	Trifolium	-1.3	0.178702	0.935	Unchanged	Disease resistance protein	GO:0006952; GO:0043531; GO:0051707	defense response [GO:0006952]; response to other organism [GO:0051707]		ADP binding [GO:0043531]	Q9LRR4	AT3G14470
A0A2K3LQC7	Trifolium	0.783	0.124388	0.918	Unchanged	Receptor-like protein kinase	GO:0016301; GO:0016310	phosphorylation [GO:0016310]		kinase activity [GO:0016301]	A0A1P8AWX3	#N/A
A0A2K3LQD1	Trifolium	0.599	0.205079	0.94	Unchanged	DNA-binding storekeeper transcriptional regulator	GO:0003677; GO:0006355	regulation of DNA-templated transcription [GO:0006355]		DNA binding [GO:0003677]	F4K5T4	AT5G28040
A0A2K3LQD4	Trifolium	-0.0405	0.873097	0.976	Unchanged	ER membrane protein complex subunit 10	GO:0005783; GO:0016020		endoplasmic reticulum [GO:0005783]; membrane [GO:0016020]		O80798	AT1G65270
A0A2K3LQD5	Trifolium	0.208	0.726368	0.973	Unchanged	Pescadillo-like protein	GO:0005730; GO:0042254	ribosome biogenesis [GO:0042254]	nucleolus [GO:0005730]		Q9LYK7	AT5G14520
A0A2K3LQE8	Trifolium	-0.00183	0.99574	0.978	Unchanged	Protein ASPARTIC PROTEASE IN GUARD CELL 2-like	GO:0004190; GO:0006508	proteolysis [GO:0006508]		aspartic-type endopeptidase activity [GO:0004190]	F4K5B9	AT5G07030
A0A2K3LQG5	Trifolium	-0.637	0.403119	0.96	Unchanged	Nucleolar protein 6-like	GO:0003723; GO:0005730		nucleolus [GO:0005730]	RNA binding [GO:0003723]	Q0WVM5	AT1G63810
A0A2K3LQH4	Trifolium	0.165	0.748679	0.973	Unchanged	SWI/SNF complex component SNF12-like protein					Q9FMT4	AT5G14170
A0A2K3LQH5	Trifolium	0.582	0.500487	0.965	Unchanged	Haloacid dehalogenase-like hydrolase domain-containing protein 3-like	GO:0016787			hydrolase activity [GO:0016787]	Q9ZVB6	AT2G41250
A0A2K3LQK0	Trifolium	0.476	0.273672	0.95	Unchanged	Oligopeptidase A	GO:0004222; GO:0006508; GO:0046872	proteolysis [GO:0006508]		metal ion binding [GO:0046872]; metalloendopeptidase activity [GO:0004222]	Q94AM1	AT5G65620
A0A2K3LQL2	Trifolium	0.232	0.613244	0.969	Unchanged	Annexin	GO:0005509; GO:0005544; GO:0006950	response to stress [GO:0006950]		calcium ion binding [GO:0005509]; calcium-dependent phospholipid binding [GO:0005544]	F4KGH1	#N/A
[truncated: 6,746 more rows]

## Sheet: Trifolium-EnrichBP
Biological Process (BP) GO terms from the GO enrichment analysis of nodule DAPs belonging to infected root cells.
[truncated: 374 more rows]

[truncated: 6 more sheets: Trifolium-EnrichMF, Trifolium-EnrichCC, Rhizobium-GrpsBP, Rhizobium-GrpsMF, Rhizobium-GrpsCC, Feuil1]
